# Supplementary material for: A High-Dimensional, Deep-Sequencing Study of Lung Adenocarcinoma in Female Never-Smokers
Source: PLoS One. 2013 Feb 6;8(2):e55596. doi: 10.1371/journal.pone.0055596 (PMC3566005; doi:10.1371/journal.pone.0055596)
Supplement: File S2 — List of differentially expressed genes and isoforms (DEGs and DEIs). (XLS) [file pone.0055596.s002.xls]

## Sheet: DEG list
UP regulated in cancer			DOWN regulated in cancer
Gene Symbol	nPatDE	nPat2fold	Gene Symbol	nPatDE	nPat2fold		Number of up-regulated genes in tumors
FUT3	6	6	BMPER	6	6		nPatDE	nPat2fold					Sum
KRT80	6	6	ITM2A	6	6			6	5	4	3	2
HS6ST2	6	6	ADAMTS8	6	6		6	98	89	36	6		229
MMP1	6	6	HSPB2	6	6		5	6	89	31	4		130
GPR110	6	6	MMRN2	6	6		4		5	85	7	1	98
SLC25A10	6	6	FHL1	6	6		3		3	2	81		86
CHRNB1	6	6	ANGPTL1	6	6		Sum	104	186	154	98	1	543
GLB1L2	6	6	UPK3B	6	6
PPAP2C	6	6	ITIH5	6	6		Number of down-regulated genes in tumors
MUC20	6	6	CASKIN2	6	6		nPatDE	nPat2fold							Sum
NME1	6	6	CCDC48	6	6			6	5	4	3	2	1	0
PDIA4	6	6	FGFBP2	6	6		6	289	180	104	36	4			613
CHEK1	6	6	MYADM	6	6		5	3	103	61	12	1			180
MDK	6	6	GJA4	6	6		4	1	4	44	19	1	2	1	72
FERMT1	6	6	EGFL7	6	6		3	1	2	3	40	4	1		51
MMP11	6	6	THBD	6	6		Sum	294	289	212	107	10	3	1	916
EPHX3	6	6	LRRC36	6	6
CCNO	6	6	CCBE1	6	6
SRD5A3	6	6	ITLN1	6	6
CRABP2	6	6	FCN1	6	6		Number of differentially regulated genes
FBXO32	6	6	MYOC	6	6		nPatDE	nPat2fold (UP)					nPat2fold (DOWN)							Sum
NHS	6	6	GPD1	6	6			6	5	4	3	2	6	5	4	3	2	1	0
CEACAM6	6	6	CLDN5	6	6		6	98	89	36	6		289	180	104	36	4			842
IKZF2	6	6	ZFP36	6	6		5	6	89	31	4		3	103	61	12	1			310
FUT2	6	6	KLF2	6	6		4		5	85	7	1	1	4	44	19	1	2	1	170
B3GNT3	6	6	TCF21	6	6		3		3	2	81		1	2	3	40	4	1		137
PTK6	6	6	SIK1	6	6		Sum	104	186	154	98	1	294	289	212	107	10	3	1	1459
CEACAM5	6	6	AATK	6	6
PLAT	6	6	GRASP	6	6
SLFN13	6	6	RNF122	6	6
ABCC3	6	6	CD93	6	6
B4GALNT3	6	6	NES	6	6
PYCR1	6	6	IL6	6	6
CDH3	6	6	C1orf183	6	6
SPINK1	6	6	C20orf160	6	6
FAM83A	6	6	LYVE1	6	6
DEPTOR	6	6	HIGD1B	6	6
OCIAD2	6	6	MDGA1	6	6
P2RY6	6	6	C11orf96	6	6
GOLM1	6	6	ADAMTS1	6	6
FUT8	6	6	C10orf116	6	6
TK1	6	6	AOC3	6	6
PRDX4	6	6	KANK3	6	6
SPAG4	6	6	PEAR1	6	6
ST14	6	6	MT1M	6	6
FHL2	6	6	GNLY	6	6
SPDEF	6	6	PPM1F	6	6
LOC100128338	6	6	PRX	6	6
KNTC1	6	6	PCDH12	6	6
CCNB1	6	6	ARHGEF4	6	6
GREM1	6	6	CXCR1	6	6
COL10A1	6	6	LTBP4	6	6
TMEM45B	6	6	DENND2A	6	6
MYBL2	6	6	NTNG1	6	6
LAD1	6	6	CAMP	6	6
ENC1	6	6	FIGF	6	6
SEZ6L2	6	6	HSPA12B	6	6
MSL3P1	6	6	GADD45B	6	6
CTHRC1	6	6	STARD8	6	6
MANEAL	6	6	HIC1	6	6
CDH1	6	6	C17orf91	6	6
FLJ22184	6	6	CXCL3	6	6
CDC20	6	6	ADCY4	6	6
CST1	6	6	NOTCH4	6	6
COL11A1	6	6	EDNRB	6	6
TRIM2	6	6	HSPB6	6	6
HMGB3	6	6	ANKRD29	6	6
PVRL4	6	6	FAM150B	6	6
AGR2	6	6	ANXA8L1	6	6
ENPP5	6	6	SLIT2	6	6
LOC100499467	6	6	PKN3	6	6
PVT1	6	6	KCNK3	6	6
KRT15	6	6	INMT	6	6
ERO1L	6	6	ADH1B	6	6
EPHB2	6	6	DACH1	6	6
ENPP3	6	6	TSPAN7	6	6
TSPAN6	6	6	FUT1	6	6
STK39	6	6	KCNMB4	6	6
KIF2C	6	6	FPR2	6	6
GPT2	6	6	VWF	6	6
SBK1	6	6	BAALC	6	6
SULF1	6	6	PDK4	6	6
TMPRSS4	6	6	RAMP2	6	6
RALGPS2	6	6	GDF10	6	6
SRPX2	6	6	FHL5	6	6
GALNT7	6	6	PKNOX2	6	6
ETV4	6	6	F10	6	6
CP	6	6	SOCS2	6	6
RCC1	6	6	PPP1R15A	6	6
PODXL2	6	6	TEK	6	6
SIX1	6	6	SASH1	6	6
FGF11	6	6	CLEC3B	6	6
ECT2	6	6	PTRF	6	6
SPTBN2	6	6	FXYD6	6	6
SERINC2	6	6	LRRC32	6	6
IGFBP3	6	6	CXCR2	6	6
FER1L4	6	6	RAMP3	6	6
KCNK5	6	6	KIAA0040	6	6
TFAP2C	6	5	CASS4	6	6
GCNT1	6	5	PCDH17	6	6
PPP1R14B	6	5	CES1	6	6
RHPN1	6	5	RAPGEF4	6	6
PDXDC1	6	5	LAMC3	6	6
GMDS	6	5	TMOD1	6	6
ANKRD22	6	5	HBA2	6	6
CLDN4	6	5	TNNC1	6	6
PLAU	6	5	AFAP1L1	6	6
LGR4	6	5	SEMA5A	6	6
KDELR3	6	5	DES	6	6
C1orf106	6	5	GRK5	6	6
HN1L	6	5	TGFBR3	6	6
HOOK1	6	5	CD36	6	6
EFNA4	6	5	STXBP6	6	6
CLDN3	6	5	ZBED2	6	6
SGPP2	6	5	CLDN18	6	6
GRHL1	6	5	DUSP1	6	6
NLN	6	5	FRMD3	6	6
MMP7	6	5	TBX2	6	6
RNF43	6	5	PDE2A	6	6
CLIC6	6	5	GIMAP8	6	6
CXCL14	6	5	TIE1	6	6
BLNK	6	5	NKD1	6	6
ALDH18A1	6	5	CA4	6	6
SLC41A2	6	5	SPOCK2	6	6
KIF20A	6	5	CDH5	6	6
ITGA11	6	5	TNXB	6	6
FUCA1	6	5	ABHD6	6	6
SMPDL3B	6	5	FOSB	6	6
FGD6	6	5	S100A12	6	6
TESC	6	5	COL6A6	6	6
TPBG	6	5	NR4A3	6	6
FAM111B	6	5	CAV2	6	6
IGSF9	6	5	SYNM	6	6
PDK1	6	5	PLAC9	6	6
MACC1	6	5	PTPRB	6	6
GRAMD3	6	5	HBA1	6	6
SLC22A18	6	5	FCN3	6	6
SULT1C2	6	5	COX7A1	6	6
PROM2	6	5	TSPAN18	6	6
PRSS22	6	5	FXYD1	6	6
MAD2L1	6	5	PTN	6	6
GSDMB	6	5	ACVRL1	6	6
CAPN13	6	5	S1PR1	6	6
ZNF117	6	5	ID1	6	6
CDCA5	6	5	C20orf46	6	6
HOXD1	6	5	NOVA2	6	6
SLC2A1	6	5	CYP4B1	6	6
MFSD4	6	5	TMEM88	6	6
UNC5CL	6	5	HBB	6	6
ATP1B1	6	5	DLL4	6	6
TMEM92	6	5	NRN1	6	6
GOLGA7B	6	5	DPT	6	6
POU2AF1	6	5	ERG	6	6
DIO2	6	5	STX11	6	6
DERL3	6	5	SFTPA1	6	6
EPCAM	6	5	JUND	6	6
CD79A	6	5	ESAM	6	6
SLC5A3	6	5	SLC5A4	6	6
TMPRSS13	6	5	ARHGEF15	6	6
GJB2	6	5	EMCN	6	6
SLC39A11	6	5	FAM162B	6	6
ST6GALNAC1	6	5	MME	6	6
SERTAD4	6	5	ABCA8	6	6
SYT7	6	5	EML1	6	6
TMED3	6	5	CAV1	6	6
EHF	6	5	SLC25A25	6	6
TMEM177	6	5	LOC100302650	6	6
VSTM2L	6	5	KLF9	6	6
SPP1	6	5	PTH1R	6	6
CCNB2	6	5	PTPLA	6	6
TOP2A	6	5	TAL1	6	6
RRM2	6	5	AGAP11	6	6
PGM2L1	6	5	LOC100507632	6	6
ADAM28	6	5	BMP6	6	6
PLK1	6	5	SHANK3	6	6
RAMP1	6	5	C5AR1	6	6
BUB1	6	5	RASIP1	6	6
C16orf75	6	5	SOCS3	6	6
NQO1	6	5	MAP3K8	6	6
ANKRD56	6	5	S100A8	6	6
MKI67	6	5	APOBEC3A	6	6
HOXB2	6	5	ROBO4	6	6
AHNAK2	6	5	KL	6	6
DSP	6	5	AREG	6	6
C11orf80	6	5	GATA6	6	6
STEAP3	6	5	GKN2	6	6
IGLL5	6	5	FGD5	6	6
ITGB8	6	4	HBEGF	6	6
ZDHHC9	6	4	RTKN2	6	6
SLC35F2	6	4	CDO1	6	6
CAPN8	6	4	LAMP3	6	6
CEACAM1	6	4	ID2	6	6
CD24	6	4	CFP	6	6
TSPAN1	6	4	CSRNP1	6	6
COL3A1	6	4	CLEC1A	6	6
SPINT2	6	4	ADAMTS4	6	6
SOX4	6	4	LILRA5	6	6
TGFA	6	4	ECSCR	6	6
ESRP1	6	4	ADRB2	6	6
LRIG3	6	4	CLIC5	6	6
COL1A1	6	4	NCKAP5	6	6
TNFRSF21	6	4	SFTPA2	6	6
FOXM1	6	4	CTNNAL1	6	6
THBS2	6	4	CXCL2	6	6
CFB	6	4	ADAMTS15	6	6
TXNDC17	6	4	HAS1	6	6
PHKA1	6	4	LDB2	6	6
MAL2	6	4	GPIHBP1	6	6
RAB27B	6	4	CDC42EP2	6	6
GALNT6	6	4	BTNL9	6	6
STEAP1	6	4	PDLIM2	6	6
F2RL1	6	4	SCARA5	6	6
RAB38	6	4	STARD9	6	6
TRPV4	6	4	SLCO2A1	6	6
COL5A2	6	4	PRF1	6	6
PCDH7	6	4	FOXF1	6	6
DPP4	6	4	SH3BP5	6	6
LAPTM4B	6	4	SOX7	6	6
PIGR	6	4	EPAS1	6	6
VCAN	6	4	SEMA3B	6	6
C16orf88	6	4	ADAMTSL3	6	6
CIT	6	4	C13orf15	6	6
PC	6	4	SDPR	6	6
SFRP2	6	3	ARHGAP31	6	6
SLC12A2	6	3	HSPB8	6	6
CAPN5	6	3	MYCT1	6	6
LY6E	6	3	PTPRM	6	6
SRPK1	6	3	AQP1	6	6
SCGB3A1	6	3	SEMA6A	6	6
DLGAP5	5	6	MGAT3	6	6
ZWINT	5	6	LPHN2	6	6
PSAT1	5	6	C11orf9	6	6
ACHE	5	6	COX4I2	6	6
HIST1H2BD	5	6	EGR1	6	6
GJB1	5	6	CLIC3	6	6
C8orf73	5	5	GPM6A	6	6
SCG5	5	5	ITPRIP	6	6
AFAP1-AS1	5	5	LHFP	6	6
TMEM159	5	5	CYYR1	6	6
STK32A	5	5	PECAM1	6	6
ARSE	5	5	S100A3	6	6
CXCL13	5	5	NR4A2	6	6
ERV3-1	5	5	NDRG4	6	6
PCSK1N	5	5	TTLL7	6	6
LOC151009	5	5	ANKRD1	6	6
CILP	5	5	ABLIM3	6	6
HABP2	5	5	GPR146	6	6
PKIB	5	5	FAM107A	6	6
FCGBP	5	5	STARD13	6	6
PLEK2	5	5	RHOJ	6	6
TOX3	5	5	TGM1	6	6
MX2	5	5	SFTPC	6	6
CEP55	5	5	ZNF331	6	6
RHBDL2	5	5	CORO2B	6	6
THNSL1	5	5	LDLR	6	6
ARHGAP40	5	5	SOSTDC1	6	6
XDH	5	5	PGM5	6	6
TFAP2A	5	5	HEG1	6	6
IGFL2	5	5	FOS	6	6
WFDC3	5	5	CLEC14A	6	6
C20orf103	5	5	ANXA8L2	6	6
IGF2BP3	5	5	SVEP1	6	6
CXCL17	5	5	FLI1	6	6
FAM190A	5	5	BCL6B	6	6
MZB1	5	5	FCGR3B	6	6
HOXB7	5	5	MFAP4	6	6
ALG1L	5	5	ITLN2	6	6
HKDC1	5	5	KIAA1462	6	6
MUC21	5	5	JUNB	6	6
PHLDA2	5	5	SH2D3C	6	6
SCIN	5	5	C19orf59	6	6
FA2H	5	5	AGER	6	6
CDKN3	5	5	ZDHHC14	6	6
KIAA0101	5	5	GRIA1	6	6
ACE2	5	5	FSTL3	6	6
C8orf39	5	5	SCN4B	6	6
DNAJC22	5	5	LAMA3	6	6
CENPF	5	5	CD300E	6	6
ANKRD36BP2	5	5	ACE	6	6
CES3	5	5	LIMS2	6	6
COMP	5	5	SCUBE1	6	6
KCNN4	5	5	GSTM5	6	6
UHRF1	5	5	NR4A1	6	6
ANLN	5	5	SOX17	6	6
IQGAP3	5	5	KLF4	6	6
RPS10P7	5	5	NPR1	6	6
SLC9A7	5	5	GRRP1	6	6
CLDN2	5	5	FGFR4	6	6
GYG2	5	5	ABI3BP	6	6
ABP1	5	5	KANK2	6	5
RHOV	5	5	HLX	6	5
PTPRH	5	5	FOSL1	6	5
CDCA8	5	5	GPR4	6	5
LY6D	5	5	SERPING1	6	5
CDCA7	5	5	DOCK4	6	5
UBE2T	5	5	ARHGAP6	6	5
NT5E	5	5	LPL	6	5
CHAD	5	5	CYS1	6	5
ERI2	5	5	ST6GALNAC2	6	5
METTL7B	5	5	SYT15	6	5
REEP6	5	5	PPAP2B	6	5
CRLF1	5	5	ATOH8	6	5
SPACA4	5	5	MAFK	6	5
TMEM184A	5	5	RAI2	6	5
CR2	5	5	FPR1	6	5
PPP1R14D	5	5	PTGER2	6	5
BACE2	5	5	SELP	6	5
GCNT3	5	5	PTPN21	6	5
TMC5	5	5	SLC2A3	6	5
IL13RA2	5	5	KDM6B	6	5
POF1B	5	5	ADARB1	6	5
TUBB3	5	5	LMO2	6	5
WFDC2	5	5	DAPK2	6	5
NUSAP1	5	5	HECW2	6	5
TPX2	5	5	DLL1	6	5
SCUBE3	5	5	LIN7A	6	5
GINS2	5	5	HYAL2	6	5
GATM	5	5	NFKBIA	6	5
ZNF486	5	5	KIF17	6	5
SPAG5	5	5	AKAP12	6	5
C10orf81	5	5	BMP5	6	5
COL17A1	5	5	KLF6	6	5
LOC440335	5	5	PPARG	6	5
GRHL2	5	5	TMEM139	6	5
LOC100130557	5	4	TNS1	6	5
TONSL	5	4	TMEM204	6	5
ATAD2	5	4	FAR2	6	5
FAP	5	4	GBP4	6	5
CD180	5	4	C10orf54	6	5
COL9A2	5	4	TMEM100	6	5
CCBP2	5	4	EGR3	6	5
SDC1	5	4	BCHE	6	5
PROM1	5	4	SULT1C4	6	5
HHLA2	5	4	TBX3	6	5
WISP1	5	4	FAM105A	6	5
PPAT	5	4	AOX1	6	5
FRK	5	4	DARC	6	5
EFHC2	5	4	NDST1	6	5
GGCT	5	4	NKG7	6	5
S100A2	5	4	PLA2G2A	6	5
C6orf141	5	4	CSPG4	6	5
AURKB	5	4	MFNG	6	5
HELLS	5	4	DNAJB4	6	5
PCP4L1	5	4	FAM189A2	6	5
GPR160	5	4	APOLD1	6	5
PNMAL1	5	4	TUBB6	6	5
TRIP13	5	4	KRT4	6	5
LRRC15	5	4	PCDHGB7	6	5
PPP1R1B	5	4	PDGFB	6	5
IGFBP2	5	4	CFD	6	5
EGLN3	5	4	APLN	6	5
STX1A	5	4	HYAL1	6	5
IYD	5	4	JPH1	6	5
SLC17A9	5	4	REEP1	6	5
MSI2	5	4	GIPC3	6	5
MEG3	5	3	CRIM1	6	5
MPV17L	5	3	RGS2	6	5
CLEC5A	5	3	OLFML1	6	5
LRP8	5	3	VIPR1	6	5
HMMR	4	5	UNC13D	6	5
DNAH14	4	5	C14orf139	6	5
DIO1	4	5	GALNTL4	6	5
HIST1H2BG	4	5	NPNT	6	5
C8orf47	4	5	GATA2	6	5
SLC6A3	4	4	PHACTR1	6	5
SERPIND1	4	4	HERC2P3	6	5
PLEKHN1	4	4	CBFA2T3	6	5
HOXC6	4	4	DCHS1	6	5
NAALADL2	4	4	PER1	6	5
AK4	4	4	PEBP4	6	5
ARHGEF38	4	4	CALCRL	6	5
CLDN9	4	4	IGSF10	6	5
KCNQ3	4	4	WISP2	6	5
PKMYT1	4	4	WNT11	6	5
SLC27A2	4	4	LMCD1	6	5
ARHGEF19	4	4	NEDD9	6	5
NEK2	4	4	GPC3	6	5
BUB1B	4	4	SELE	6	5
ACSM3	4	4	GNG11	6	5
XKRX	4	4	GCOM1	6	5
CBLC	4	4	MARCO	6	5
NCAPG	4	4	AMIGO1	6	5
CST2	4	4	OLFML2A	6	5
ALDH1L1	4	4	DOCK6	6	5
TNFRSF17	4	4	ABCG2	6	5
KIF26B	4	4	HSPC159	6	5
VTCN1	4	4	PDE5A	6	5
GLB1L3	4	4	SLIT3	6	5
DNA2	4	4	CX3CR1	6	5
FCRL5	4	4	WWC2	6	5
CD207	4	4	MCAM	6	5
TMEM156	4	4	EMP2	6	5
C4BPB	4	4	C6orf145	6	5
SYT12	4	4	IER2	6	5
NUF2	4	4	SPARCL1	6	5
AMBP	4	4	MAFF	6	5
EFNA3	4	4	SNX22	6	5
UGT8	4	4	PRKCE	6	5
S100P	4	4	MYH10	6	5
GDF15	4	4	ST6GALNAC5	6	5
MMP10	4	4	GYPC	6	5
RECQL4	4	4	JAM2	6	5
MB	4	4	ID4	6	5
TRIM46	4	4	ARHGAP29	6	5
S100B	4	4	VAMP5	6	5
MPP6	4	4	SNAI1	6	5
GALNT14	4	4	SLC19A1	6	5
ZHX1-C8ORF76	4	4	ADAMTSL4	6	5
SGK2	4	4	FAM43A	6	5
ODZ4	4	4	YPEL4	6	5
LGSN	4	4	NOSTRIN	6	5
MAP7D2	4	4	ABCA3	6	5
TMEM59L	4	4	CYR61	6	5
KLHDC7A	4	4	ARHGEF10	6	5
DNAJC12	4	4	FCRL6	6	5
SIX4	4	4	IL3RA	6	5
TNS4	4	4	GAS6	6	5
SOX2	4	4	GIMAP1	6	5
SLC29A4	4	4	CCL21	6	5
LOC283104	4	4	GZMH	6	5
NELL1	4	4	MYL9	6	5
CDCA3	4	4	P2RY14	6	5
EFNA5	4	4	SOX18	6	5
HS3ST1	4	4	2011-09-04	6	5
NDC80	4	4	GJD3	6	5
GPR87	4	4	A2M	6	5
FCRL2	4	4	TBX4	6	5
LRRC31	4	4	TACC1	6	5
RAB19	4	4	FLT4	6	5
P4HA3	4	4	FEZ1	6	5
RAD51AP1	4	4	SEMA6D	6	5
CDC6	4	4	RND1	6	5
QPRT	4	4	TPPP	6	5
TUBB2B	4	4	ATF3	6	5
KIF11	4	4	AQP4	6	5
CCNE1	4	4	KIAA1274	6	5
SUSD4	4	4	GIMAP7	6	5
CD1A	4	4	FOXF2	6	5
CA9	4	4	SCN7A	6	5
C4orf7	4	4	LAMA4	6	5
KIF4A	4	4	JDP2	6	5
LYPD1	4	4	SPTBN1	6	5
EEF1A2	4	4	ELMO1	6	5
GSDMC	4	4	GIMAP6	6	5
GFRA3	4	4	FAM13C	6	5
MELK	4	4	CNN1	6	5
CENPK	4	4	THSD1	6	5
C17orf57	4	4	TOX2	6	5
TEX9	4	4	CCRL1	6	5
CAPN12	4	3	MMP19	6	5
TRIM6	4	3	FABP4	6	5
DOK5	4	3	LILRB2	6	5
BCAS1	4	3	ITGA8	6	5
BIRC5	4	3	FMO2	6	5
CD19	4	3	PPARGC1A	6	5
BCL2L14	4	3	FBLN1	6	5
EYA2	4	2	ID3	6	5
MIA	3	5	CTSW	6	5
HOXC4	3	5	PLEKHH2	6	5
PODNL1	3	5	PRG4	6	5
CDC45	3	4	KAL1	6	5
RPS15AP10	3	4	MMRN1	6	5
MND1	3	3	FKBP1B	6	5
SRPK3	3	3	DUSP8	6	5
PRAME	3	3	DUOX1	6	5
HCAR1	3	3	PLA1A	6	5
ZNF774	3	3	C14orf132	6	5
CHRDL2	3	3	NOTCH1	6	5
LOC728192	3	3	HCAR2	6	5
LOC729966	3	3	PTGER4	6	4
C7orf10	3	3	IL7R	6	4
PITX1	3	3	LRP4	6	4
HOXA10	3	3	FBLN5	6	4
ABCB9	3	3	SLC39A8	6	4
RET	3	3	CHI3L2	6	4
PNOC	3	3	ROBO2	6	4
MYO3B	3	3	LILRA6	6	4
ALDH3B2	3	3	ALDH3B1	6	4
PRELID2	3	3	FAM69B	6	4
FBXO16	3	3	PRELP	6	4
TBX6	3	3	LIMCH1	6	4
FOXA3	3	3	NRARP	6	4
SLC22A18AS	3	3	CRISPLD2	6	4
PLEKHG7	3	3	SERTAD1	6	4
C2CD4A	3	3	GPX3	6	4
HIST1H2AE	3	3	RHOB	6	4
CATSPERB	3	3	FAM167A	6	4
GPR172B	3	3	CAMK2N1	6	4
HOXC10	3	3	KLF10	6	4
C6orf222	3	3	PPP1R16B	6	4
MEX3A	3	3	NHSL1	6	4
RGS17	3	3	TENC1	6	4
LOC100129480	3	3	IL18R1	6	4
MYEOV	3	3	CRYAB	6	4
TBX15	3	3	LOC284454	6	4
CHODL	3	3	TIMP3	6	4
ATP10B	3	3	PTGDS	6	4
CAPNS2	3	3	FAM65A	6	4
ACY3	3	3	WNT2	6	4
TRIM17	3	3	CD300C	6	4
SYCP2	3	3	PCOLCE2	6	4
CHST6	3	3	WFS1	6	4
RASAL1	3	3	COL13A1	6	4
VIL1	3	3	NFIL3	6	4
MCM10	3	3	CA2	6	4
ERN2	3	3	FOSL2	6	4
ATP6V0A4	3	3	ITGA5	6	4
FCRLA	3	3	PDZD2	6	4
RAB26	3	3	DPEP2	6	4
DPEP1	3	3	PLLP	6	4
NCCRP1	3	3	TNFRSF10D	6	4
CABYR	3	3	C4orf31	6	4
STIL	3	3	MYO1F	6	4
STYK1	3	3	ANGPT1	6	4
TMEM63C	3	3	ARRB1	6	4
MYBPH	3	3	LIFR	6	4
ESPN	3	3	CACNA2D2	6	4
HOXC11	3	3	GLIPR2	6	4
HOXB9	3	3	EFEMP1	6	4
LOC642587	3	3	DENND3	6	4
TFF1	3	3	CD97	6	4
CCDC160	3	3	PHLDB2	6	4
C2orf15	3	3	MRGPRF	6	4
GPX2	3	3	PLA2G4F	6	4
SLC4A11	3	3	OSR1	6	4
PLA2G4E	3	3	FYN	6	4
ADAMTS14	3	3	CAT	6	4
STRA6	3	3	TNFAIP3	6	4
ZNF572	3	3	LHX6	6	4
LGI2	3	3	CRTAC1	6	4
ALOX12P2	3	3	FZD4	6	4
MESP1	3	3	ZNF423	6	4
TMPRSS11E	3	3	CD34	6	4
STK31	3	3	RASL12	6	4
BCL2L15	3	3	TRPV2	6	4
MFSD6L	3	3	KIAA1324L	6	4
CILP2	3	3	MT2A	6	4
BARX2	3	3	OTUD1	6	4
WISP3	3	3	MFSD2A	6	4
LEMD1	3	3	HAS2	6	4
CLDN10	3	3	AQP9	6	4
RHBDL1	3	3	FIBIN	6	4
KRT16	3	3	CX3CL1	6	4
			HLF	6	4
			FAM46B	6	4
			GPR153	6	4
			CRIP1	6	4
			CDKN1C	6	4
			G0S2	6	4
			PKDCC	6	4
			CHRDL1	6	4
			PNPLA6	6	4
			ABTB1	6	4
			EMP1	6	4
			LEPR	6	4
			TEAD4	6	4
			EMP3	6	4
			PLA2G1B	6	4
			KLF13	6	4
			EHD2	6	4
			ANXA3	6	4
			S100A4	6	4
			NKD2	6	4
			SHROOM4	6	4
			HLA-E	6	4
			PKIG	6	4
			RECK	6	4
			PTGIR	6	4
			CETP	6	4
			GPR133	6	4
			NEBL	6	4
			MCOLN3	6	4
			ICAM2	6	4
			RCAN1	6	3
			CCDC102B	6	3
			OASL	6	3
			MYH11	6	3
			PTGIS	6	3
			PITPNM2	6	3
			GJA5	6	3
			LMOD1	6	3
			C10orf10	6	3
			IL11RA	6	3
			CD274	6	3
			FASN	6	3
			C7	6	3
			HPCAL1	6	3
			SEMA3F	6	3
			SFTPD	6	3
			THSD4	6	3
			NDRG2	6	3
			NLRC4	6	3
			NRGN	6	3
			DAB2IP	6	3
			EGFL6	6	3
			VGLL3	6	3
			CADM3	6	3
			SYDE1	6	3
			TMEM108	6	3
			FERMT2	6	3
			TOM1L2	6	3
			EGR2	6	3
			LATS2	6	3
			APOL3	6	3
			GMFG	6	3
			IL33	6	3
			SPN	6	3
			SLC1A1	6	3
			FLNC	6	3
			HEYL	6	2
			SYNPO	6	2
			AMOTL2	6	2
			OLR1	6	2
			CD300LG	5	6
			NFASC	5	6
			ADAM33	5	6
			C2CD4B	5	5
			LOC90246	5	5
			IL1B	5	5
			RXFP1	5	5
			GFOD1	5	5
			RASGRP4	5	5
			RSPO1	5	5
			RETN	5	5
			SLC19A3	5	5
			RGS9	5	5
			CXCR7	5	5
			WNT2B	5	5
			SHISA3	5	5
			ARC	5	5
			AVPI1	5	5
			SLC6A4	5	5
			PPP1R14A	5	5
			IL1RL1	5	5
			HHIP	5	5
			TCEAL2	5	5
			C13orf33	5	5
			MASP1	5	5
			ARHGEF26	5	5
			C1orf115	5	5
			PDZD4	5	5
			SGCE	5	5
			CPB2	5	5
			GPA33	5	5
			SEMA3G	5	5
			CSF3	5	5
			RSPO2	5	5
			GLT25D2	5	5
			CD244	5	5
			SSTR1	5	5
			NXF3	5	5
			SRPX	5	5
			KIAA1683	5	5
			FAM101B	5	5
			GPR97	5	5
			ABCA9	5	5
			SLC11A1	5	5
			ADRA1A	5	5
			SGCG	5	5
			OGN	5	5
			CCDC85A	5	5
			P2RY1	5	5
			ECEL1P2	5	5
			SH3GL3	5	5
			C2orf40	5	5
			DISP1	5	5
			F2RL3	5	5
			ODF3L1	5	5
			MEIS1	5	5
			LEPREL1	5	5
			ARAP3	5	5
			PDE1C	5	5
			WIF1	5	5
			C8orf84	5	5
			GPER	5	5
			TNFAIP8L3	5	5
			EXOC3L1	5	5
			DNASE1L3	5	5
			SGCA	5	5
			FGD3	5	5
			FFAR2	5	5
			C3orf54	5	5
			PCSK9	5	5
			CLEC4E	5	5
			TWIST2	5	5
			TMEM178	5	5
			GIMAP5	5	5
			HOXA5	5	5
			FAM167B	5	5
			CD52	5	5
			MAPK4	5	5
			AGTR1	5	5
			ASPA	5	5
			MYC	5	5
			WFDC1	5	5
			DUOXA1	5	5
			PHOSPHO1	5	5
			RASGRP2	5	5
			EFNB2	5	5
			ACADL	5	5
			HCAR3	5	5
			NXPH3	5	5
			MMP25	5	5
			ANO2	5	5
			MEFV	5	5
			GPBAR1	5	5
			C1QTNF7	5	5
			DUSP2	5	5
			PID1	5	5
			LOC158376	5	5
			PADI4	5	5
			RBP4	5	5
			ZBTB16	5	5
			CGNL1	5	5
			TBX5	5	5
			MAMDC2	5	5
			TARP	5	5
			GPM6B	5	5
			DPP6	5	5
			GHR	5	4
			CCL5	5	4
			S1PR4	5	4
			SPRYD7	5	4
			CD101	5	4
			ALOX15	5	4
			FBXL7	5	4
			IL18RAP	5	4
			CITED4	5	4
			BMP2	5	4
			CEBPD	5	4
			PRAM1	5	4
			ADORA2A	5	4
			FBN3	5	4
			SLC5A9	5	4
			ACSS3	5	4
			MSRB3	5	4
			WASF3	5	4
			CCL4	5	4
			STC2	5	4
			SMAD6	5	4
			PI16	5	4
			TBX21	5	4
			MAP2	5	4
			MAPK11	5	4
			MT1X	5	4
			LOC401093	5	4
			NCRNA00312	5	4
			B3GALNT1	5	4
			IGFBP6	5	4
			LILRA2	5	4
			IRF1	5	4
			CCL2	5	4
			CEBPB	5	4
			SLC2A6	5	4
			ZNF366	5	4
			DOK2	5	4
			GAS2L1	5	4
			GPRC5D	5	4
			EFR3B	5	4
			ARID5A	5	4
			VSIG4	5	4
			RRAS	5	4
			EDN1	5	4
			O3FAR1	5	4
			GZMB	5	4
			STAC	5	4
			TRPC6	5	4
			OSCAR	5	4
			NPR3	5	4
			NCF1	5	4
			DKK2	5	4
			POLR3H	5	4
			LRRN3	5	4
			LOC643733	5	4
			ADRB1	5	4
			HK3	5	4
			KCNJ8	5	4
			WNT9A	5	4
			ENG	5	4
			FGR	5	4
			NFATC1	5	3
			KLK11	5	3
			SFTA1P	5	3
			PDE4C	5	3
			CD247	5	3
			ADAMTS9	5	3
			CH25H	5	3
			CD69	5	3
			CSF3R	5	3
			PREX1	5	3
			RTN1	5	3
			RFX2	5	3
			LILRB3	5	2
			ST6GALNAC3	4	6
			HBG2	4	5
			BEST1	4	5
			CXorf36	4	5
			CCL23	4	5
			LILRA1	4	4
			EMR1	4	4
			BDNF	4	4
			SEC14L6	4	4
			KHDRBS2	4	4
			C19orf38	4	4
			TDRD10	4	4
			RADIL	4	4
			RNF182	4	4
			LGI4	4	4
			GPR17	4	4
			CNTN6	4	4
			PRKG2	4	4
			EPHB6	4	4
			USHBP1	4	4
			SERPINB2	4	4
			SAMD5	4	4
			ACTG2	4	4
			LGI3	4	4
			TMEM150B	4	4
			KIF26A	4	4
			C1QTNF2	4	4
			NR5A2	4	4
			TBXA2R	4	4
			LOC728643	4	4
			BMX	4	4
			ABCB1	4	4
			ANKRD33B	4	4
			RAB40A	4	4
			C13orf36	4	4
			ACTN2	4	4
			DUOXA2	4	4
			CST7	4	4
			CALB2	4	4
			HOXA4	4	4
			S1PR5	4	4
			LRRC4B	4	4
			BTNL8	4	4
			BEX1	4	4
			ST8SIA6	4	4
			KLF15	4	4
			PLAC2	4	4
			GPRIN2	4	4
			CNTFR	4	4
			COL6A5	4	3
			NDUFA4L2	4	3
			REM1	4	3
			PHEX	4	3
			KLRF1	4	3
			ADRA2C	4	3
			C14orf49	4	3
			FGF2	4	3
			HMGCS2	4	3
			EMR3	4	3
			KLRD1	4	3
			BDKRB1	4	3
			GLT1D1	4	3
			ADRA1B	4	3
			C3orf36	4	3
			MMP28	4	3
			ATP1A2	4	3
			NECAB1	4	3
			ART4	4	3
			GALNTL1	4	2
			RSPO4	4	1
			DAZAP2	4	1
			N4BP2L2	4	0
			MAL	3	6
			OLFM1	3	5
			LOC100190938	3	5
			LGALS2	3	4
			PCDHA12	3	4
			CNRIP1	3	4
			ODAM	3	3
			WT1	3	3
			GZMM	3	3
			IL1R2	3	3
			LRCH2	3	3
			TMSB15A	3	3
			VIP	3	3
			COLEC10	3	3
			FGF18	3	3
			SAMD14	3	3
			NOTUM	3	3
			DOC2B	3	3
			ENHO	3	3
			RP11-165H20.1	3	3
			HSPB7	3	3
			ATP1B2	3	3
			LOC731424	3	3
			GIPC2	3	3
			FOLR3	3	3
			GJC2	3	3
			LCN6	3	3
			TNNT2	3	3
			LOC554223	3	3
			CHRM1	3	3
			LOC100131825	3	3
			TUBB1	3	3
			PLA2G5	3	3
			SH2D1B	3	3
			C19orf76	3	3
			AOC2	3	3
			PCDHGA2	3	3
			CEACAM3	3	3
			PNMT	3	3
			PPBP	3	3
			TNF	3	3
			ABCA10	3	3
			MT1A	3	3
			VTN	3	3
			NMUR1	3	3
			CMTM2	3	3
			RELN	3	2
			LPHN3	3	2
			WNT3A	3	2
			N4BP3	3	2
			QRICH2	3	1

## Sheet: DEG_reads.edgeR.FVKM.2fold
Entrez GeneID	Gene Symbol	reads P1N	reads P1T	reads P3N	reads P3T	reads P4N	reads P4T	reads P5N	reads P5T	reads P6N	reads P6T	reads P8N	reads P8T	logConc	logFC	LR.statistic	p.value	edgeR FDR	edgeR P1.FDR	edgeR P3.FDR	edgeR P4.FDR	edgeR P5.FDR	edgeR P6.FDR	edgeR P8.FDR	FVKM P1N	FVKM P1T	FVKM P3N	FVKM P3T	FVKM P4N	FVKM P4T	FVKM P5N	FVKM P5T	FVKM P6N	FVKM P6T	FVKM P8N	FVKM P8T	nPatDE	nPat2fold
2525	FUT3	87	649	134	318	80	195	89	249	87	280	39	401	-11.589	2.01578	33.5998	6.77011e-09	1.50375e-07	6.70651e-114	8.33823e-29	2.70483e-19	1.63468e-21	1.70017e-20	8.08745e-76	1.914	15.471	2.616	8.005	1.838	5.95	2.412	7.733	2.432	7.208	1.551	16.328	6	6+
144501	KRT80	262	801	111	1319	223	948	81	510	290	718	138	470	-10.7776	2.19157	39.1243	3.97668e-10	1.10704e-08	9.40189e-71	0	5.84867e-152	3.18546e-85	1.10992e-33	5.76341e-43	2.673	8.918	1.004	15.423	3.103	13.44	1.724	12.529	3.784	9.53	2.564	8.944	6	6+
90161	HS6ST2	60	1316	36	238	28	570	42	567	31	961	49	1181	-10.9225	4.18832	122.524	1.77218e-28	8.85668e-26	0	3.14454e-48	1.73122e-166	2.30141e-129	1.3729e-220	5.98836e-283	0.72	12.767	1.336	2.692	0.261	8.915	1.193	10.668	1.756	12.519	0.793	19.596	6	6+
4312	MMP1	111	360	5	810	6	2270	237	3494	9	223	45	104	-10.5098	4.25401	95.952	1.17702e-22	2.6854e-20	1.96985e-34	5.93133e-264	0	0	1.21147e-49	3.56233e-06	3.261	9.029	0.103	21.472	0.244	73.036	7.31	112.775	0.442	6.077	1.879	4.468	6	6+
266977	GPR110	37	188	15	582	7	223	37	221	16	154	34	326	-11.9378	3.56445	85.998	1.80113e-20	2.93068e-18	4.85768e-27	5.04181e-183	2.90075e-69	1.68187e-36	3.73855e-26	4.27155e-60	4.065	17.549	1.731	68.183	1.177	38.812	2.885	24.087	1.994	21.022	5.744	65.961	6	6+
1468	SLC25A10	189	459	253	522	230	401	160	306	128	422	26	167	-11.365	1.42303	17.8524	2.38716e-05	0.000252171	3.30646e-30	6.91474e-38	1.66065e-23	1.85657e-14	2.48278e-31	9.61664e-26	4.036	10.625	4.823	12.767	5.112	11.9	4.141	9.129	3.461	10.619	1.003	6.626	6	6+
1140	CHRNB1	82	522	121	216	61	292	59	132	26	228	41	121	-11.9052	1.97272	31.6973	1.80171e-08	3.61893e-07	2.22691e-84	6.66356e-13	7.73487e-51	8.88334e-09	5.7733e-37	6.67426e-10	1.365	9.432	1.795	4.119	1.059	6.755	1.195	3.078	0.549	4.467	1.235	3.744	6	6+
89944	GLB1L2	200	899	264	750	263	1342	208	376	206	1015	163	915	-10.6604	1.98958	34.1028	5.2276e-09	1.18624e-07	3.84368e-115	1.1009e-81	6.55539e-241	2.1423e-15	3.9924e-112	3.11391e-127	2.483	12.124	2.912	10.665	3.414	23.145	3.155	6.548	3.246	14.802	3.661	21.1	6	6+
8612	PPAP2C	547	2254	262	4038	191	864	257	642	179	458	51	1458	-10.1316	2.59929	50.3281	1.30074e-12	5.74788e-11	1.15684e-266	0	1.67232e-144	2.02973e-46	2.86885e-23	0	27.273	125.699	10.938	263.703	7.851	67.32	14.381	48.949	13.433	36.073	5.357	107.694	6	6+
200958	MUC20	385	791	165	1179	356	652	124	265	171	1145	165	1017	-10.689	1.9069	30.4048	3.50652e-08	6.71551e-07	5.66932e-38	2.34228e-244	2.49914e-41	1.6051e-15	5.89783e-157	6.60053e-150	6.835	48.436	3.717	53.225	3.328	23.821	3.646	21.441	8.495	70.961	4.384	23.27	6	6+
4830	NME1	427	813	285	1013	267	714	292	723	152	388	238	534	-10.7819	1.37465	17.0526	3.63583e-05	0.000368143	4.7676e-33	6.20959e-136	2.18707e-76	2.2889e-51	6.43618e-20	1.46804e-26	42.801	88.808	25.275	116.293	28.114	99.382	36.092	102.418	19.441	45.596	43.333	99.561	6	6+
9601	PDIA4	4152	17108	4062	14165	3414	8201	4000	20823	2260	7115	1601	4795	-8.1251	1.82726	29.9458	4.4429e-08	8.34137e-07	0	0	0	0	0	0	55.453	248.241	48.27	216.72	47.632	152.198	65.186	390.309	38.339	111.765	38.718	119.076	6	6+
1111	CHEK1	28	123	21	112	13	55	46	111	16	113	31	69	-12.9474	2.00175	30.8726	2.75535e-08	5.37e-07	5.45327e-16	4.53173e-21	1.48004e-09	2.61202e-08	1.74393e-16	0.000361451	0.836	3.97	0.562	3.828	0.402	2.282	1.653	4.606	0.603	3.983	1.668	3.824	6	6+
4192	MDK	1987	12719	1044	2282	1139	5363	1430	3528	899	5303	528	1626	-9.01	1.9624	33.7624	6.22711e-09	1.39198e-07	0	2.0307e-177	0	1.50905e-247	0	5.70176e-130	142.102	972.473	68.095	186.722	82.942	533.579	118.998	342.654	79.925	452.277	67.248	215.169	6	6+
55612	FERMT1	93	599	100	949	39	280	74	322	41	281	63	240	-11.5183	2.64124	56.0696	6.99514e-14	3.83363e-12	1.55889e-97	1.7826e-219	4.60891e-60	2.0555e-42	6.53641e-40	8.35601e-25	0.684	4.798	0.653	8.002	0.301	2.863	0.668	3.337	0.384	2.429	0.841	3.286	6	6+
4320	MMP11	510	1233	42	1897	34	3068	158	2207	31	15027	12	461	-9.43759	5.3294	146.448	1.03624e-33	9.45683e-31	2.62823e-78	0	0	0	0	2.45448e-118	9.172	24.06	0.673	39.078	0.637	76.676	3.454	55.557	0.707	318.202	0.39	15.41	6	6+
79852	EPHX3	83	564	117	539	103	344	70	146	77	427	37	143	-11.669	2.08004	36.303	1.689e-09	4.21546e-08	5.3097e-94	2.62036e-88	1.99524e-46	2.33256e-08	4.45826e-52	2.32647e-15	2.178	16.02	2.746	16.197	2.807	12.545	2.217	5.337	2.554	13.218	1.751	6.969	6	6+
10309	CCNO	80	500	16	237	24	79	25	56	29	115	6	137	-12.3781	2.61014	48.6911	2.9963e-12	1.23804e-10	5.181e-80	1.36227e-62	2.93671e-11	0.000258716	2.8954e-11	9.66721e-33	2.453	16.576	0.44	8.321	0.763	3.367	0.922	2.386	1.122	4.164	0.331	7.799	6	6+
79644	SRD5A3	472	1823	564	2445	419	871	377	836	334	755	267	1171	-10.3081	1.63837	23.8677	1.0319e-06	1.46447e-05	1.99279e-203	0	3.18261e-67	5.758e-50	2.16377e-29	2.51658e-135	4.455	18.715	4.729	26.439	4.139	11.423	4.356	11.099	4.01	8.374	4.569	20.558	6	6+
1382	CRABP2	184	1322	202	1819	60	1137	248	2177	59	2151	20	710	-10.3321	3.96559	112.2	3.22947e-26	1.18924e-23	3.0069e-226	0	0	0	0	2.05526e-180	9.513	79.29	9.444	107.646	3.186	81.748	15.159	154.56	3.82	135.852	1.852	68.036	6	6+
114907	FBXO32	158	400	117	779	104	299	100	642	84	1045	49	129	-11.2811	2.26709	41.4064	1.2365e-10	3.81678e-09	9.81304e-28	4.009e-156	2.46641e-35	2.79931e-108	2.41417e-191	4.82302e-09	7.216	19.67	4.82	40.727	4.891	18.987	5.426	41.133	4.815	56.564	4.015	10.925	6	6+
4810	NHS	252	1245	232	2633	115	757	166	315	109	1613	159	2898	-10.3361	2.99035	67.1318	2.53943e-16	2.22095e-14	3.60542e-170	0	9.4857e-156	1.68362e-14	5.70807147510284e-313	0	1.206	6.505	0.983	14.445	0.579	5.036	0.981	2.136	0.718	9.065	1.386	25.868	6	6+
4680	CEACAM6	4600	103885	11924	181582	12247	55301	2773	20481	10942	36376	4691	42616	-6.49778	3.11901	74.4308	6.28024e-18	7.08722e-16	0	0	0	0	0	0	70.27	1723.23	162.201	3177.5	195.272	1173.92	51.605	438.615	212.159	653.869	129.686	1210.27	6	6+
22807	IKZF2	371	1005	309	871	124	415	207	401	221	691	322	802	-10.9396	1.47017	19.5555	9.77207e-06	0.000112825	1.1258e-75	8.81202e-94	7.63558e-56	3.85158e-19	4.30526e-47	1.26315e-47	1.537	4.462	1.114	5.64	0.597	2.347	1.099	2.311	1.149	3.301	2.385	6.083	6	6+
2524	FUT2	166	614	39	821	50	1456	28	59	43	596	25	796	-11.1408	3.59367	83.1198	7.72275e-20	1.11794e-17	1.36818e-66	1.47976e-234	0	0.000453951	2.95774e-114	1.59676e-200	4.111	27.923	0.795	27.459	1.468	73.773	0.579	2.027	1.221	11.567	2.61	29.756	6	6+
10331	B3GNT3	100	643	31	2592	12	605	37	457	26	312	12	400	-11.0331	4.48064	125.219	4.55669e-29	2.73271e-26	5.23917e-104	0	6.79598e-199	8.0135e-102	1.65012e-56	9.42029e-101	1.472	10.28	0.406	43.708	0.184	12.376	0.664	9.434	0.486	5.404	0.32	10.947	6	6+
5753	PTK6	116	852	243	860	166	484	130	307	151	998	54	160	-11.1782	2.00662	34.482	4.30215e-09	9.91243e-08	6.16397e-148	1.34115e-115	1.20438e-56	4.10891e-21	9.91561e-136	7.59166e-13	1.86	14.835	3.471	15.799	2.778	10.787	2.538	6.9	3.073	18.837	1.567	4.77	6	6+
1048	CEACAM5	140	3353	303	71966	502	18572	1095	24860	1655	35362	162	23718	-7.48461	5.60527	189.57	3.94689e-43	1.1835e-39	0	0	0	0	0	0	1.516	39.467	2.916	892.592	5.684	279.382	14.496	378.281	22.78	450.013	3.178	477.552	6	6+
5327	PLAT	2314	3907	4228	5423	1715	12456	2237	8776	1175	3255	831	2190	-8.8052	1.48899	19.0296	1.28706e-05	0.000143969	6.18881e-113	1.27816e-124	0	0	4.25904e-182	2.3251e-140	31.858	72.431	51.813	110.823	26.085	276.834	43.704	209.798	22.764	61.539	21.663	70.144	6	6+
146857	SLFN13	1138	2871	500	2136	540	980	454	862	478	1307	465	1855	-10.0779	1.48119	19.7816	8.68155e-06	0.000101406	7.38581e-193	0	2.20997e-60	3.58061e-38	6.80942e-72	2.07496e-196	5.17	14.224	2.01	11.12	2.578	6.185	2.545	5.539	2.773	6.963	3.841	15.69	6	6+
8714	ABCC3	415	1748	417	1376	213	1627	245	1062	229	958	93	903	-10.4584	2.3965	48.0444	4.16677e-12	1.66909e-10	1.27263e-210	8.1428e-173	0	1.25776e-138	4.69608e-91	2.51607e-167	21.12	98.002	15.168	68.63	16.36	87.473	11.418	62.911	11.964	49.074	8.145	73.499	6	6+
283358	B4GALNT3	437	2002	526	1280	387	869	462	1331	542	1191	241	1223	-10.1971	1.64947	24.2569	8.43032e-07	1.21533e-05	7.40454e-258	6.94847e-116	1.28063e-74	5.48374e-116	7.87408e-43	1.4278e-158	4.973	24.767	5.322	16.688	4.605	13.742	6.426	21.283	7.841	15.934	4.969	25.884	6	6+
5831	PYCR1	145	921	237	1063	121	720	153	698	81	592	24	142	-10.959	2.54433	53.8798	2.13135e-13	1.06012e-11	6.23158e-148	4.34849e-170	3.51908e-141	1.05828e-94	3.47973e-86	5.49758e-21	6.039	43.886	7.948	49.746	4.753	46.31	7.014	32.387	3.372	26.661	2.423	21.313	6	6+
1001	CDH3	737	2562	244	1970	226	1815	206	1750	210	2618	151	484	-9.98477	2.75649	60.7215	6.57483e-15	4.3262e-13	7.47072e-258	0	0	0	0	3.12845e-41	6.631	25.076	1.95	20.308	2.128	22.691	2.27	22.155	2.404	27.678	2.463	8.101	6	6+
6690	SPINK1	42	10500	74	1386	0	92	11	80	0	101	0	167	-10.0257	5.97143	162.858	2.68707e-37	3.5251e-34	0	0	4.78008e-30	1.08109e-14	1.63457e-27	6.747e-50	8.367	2161.66	14.228	315.16	0	25.571	2.315	20.219	0	24.754	0	60.945	6	6+
84985	FAM83A	8	416	3	1399	2	39	42	1072	5	536	1	89	-11.2634	6.09174	177.263	1.91906e-40	4.02812e-37	1.88557e-116	0	1.78763e-11	1.82579e-280	6.47705e-139	5.72656e-25	0.844	33.198	0.216	120.13	0.36	4.32	4.724	82.8	0.291	49.592	0.276	18.391	6	6+
64798	DEPTOR	189	1339	167	1085	130	369	189	468	92	1376	82	274	-10.7967	2.36755	45.8197	1.29652e-11	4.79119e-10	3.78291e-228	5.45771e-215	2.5895e-42	5.54677e-34	3.30188e-267	1.31689e-24	2.887	22.211	2.272	18.986	2.073	7.833	3.517	10.023	1.784	24.734	2.267	7.781	6	6+
132299	OCIAD2	221	1764	151	989	243	820	249	571	213	1123	154	959	-10.4948	2.32641	45.6278	1.42994e-11	5.23814e-10	3.78051127147388e-318	1.33557e-196	6.95344e-110	2.0375e-36	4.47451e-131	2.38113e-142	25.744	223.653	21.817	138.095	28.463	142.32	34.219	92.44	31.181	152.034	41.037	316.544	6	6+
5031	P2RY6	109	253	47	189	25	87	76	508	19	514	10	308	-11.7408	2.87187	58.4621	2.07242e-14	1.25e-12	8.43545e-16	1.05295e-28	9.43837e-13	7.45638e-88	6.78883e-115	8.99046e-77	3.74	9.377	1.448	7.426	0.888	4.15	3.127	24.173	0.822	20.847	0.618	20.547	6	6+
51280	GOLM1	1743	6255	1197	12980	1075	4411	1073	2889	823	4528	1016	7188	-8.69334	2.37135	47.2289	6.31635e-12	2.43713e-10	0	0	0	1.05467e-229	0	0	23.755	92.609	14.516	202.646	15.303	83.534	17.839	55.249	14.245	72.585	25.071	182.144	6	6+
2530	FUT8	493	1580	347	1021	301	601	255	755	232	680	308	813	-10.5044	1.49974	20.5297	5.87119e-06	7.11526e-05	8.5703e-146	2.79298e-115	1.0077e-43	4.89171e-68	1.77354e-42	6.56355e-53	7.776	26.94	4.908	18.441	4.92	13.177	4.834	16.541	4.617	12.67	8.751	23.809	6	6+
7083	TK1	145	621	109	395	122	289	181	397	89	546	50	129	-11.3813	1.76249	26.9978	2.03689e-07	3.38246e-06	3.10086e-76	1.82299e-54	3.28304e-27	5.84411e-24	1.88992e-71	8.65391e-09	3.89	18.031	2.616	12.135	3.398	10.775	5.858	14.831	3.017	17.281	2.419	6.427	6	6+
10549	PRDX4	1123	2540	1055	2295	839	1444	825	1981	528	2621	598	3582	-9.53708	1.57513	22.1798	2.48271e-06	3.27955e-05	1.63321e-142	5.66957e-177	5.66487e-80	1.40443e-133	9.89406e-290	0	62.454	151.682	53.147	146.079	47.841	111.685	54.073	150.954	36.717	173.17	59.496	369.095	6	6+
6676	SPAG4	90	250	29	221	66	111	64	283	19	203	23	181	-12.0722	2.30126	41.1736	1.39289e-10	4.23721e-09	2.2582e-20	4.89737e-48	8.58218e-07	1.27971e-37	3.04468e-36	6.26177e-31	2.75	8.26	0.794	7.733	2.091	4.715	2.352	12.018	0.733	7.326	1.266	10.269	6	6+
6768	ST14	2641	8029	2850	7460	2214	5765	1496	4965	1861	6233	745	2861	-8.65125	1.67196	25.5428	4.32679e-07	6.64856e-06	0	0	0	0	0	5.66371e-292	31.231	103.197	29.967	101.06	27.369	94.726	21.614	82.473	27.968	86.659	15.959	62.915	6	6+
2274	FHL2	672	1327	293	1527	431	846	411	1614	216	1194	186	890	-10.2415	1.88364	30.7124	2.9924e-08	5.81041e-07	1.1809e-57	2.34754e-268	1.29691e-59	2.23888e-193	4.40433e-144	2.49875e-110	22.397	47.784	8.762	58.276	14.874	39.196	16.44	74.639	9.076	47.027	11.161	55.062	6	6+
25803	SPDEF	36	592	92	673	27	171	8	124	15	171	5	341	-11.6908	3.77352	97.1588	6.39853e-23	1.56169e-20	2.48733e-137	7.30624e-141	7.30565e-35	3.1806e-29	3.85775e-31	6.03977e-93	0.8	14.258	1.826	17.13	0.624	5.282	0.215	3.848	0.422	4.479	0.201	14.08	6	6+
100128338	LOC100128338	222	1747	163	1820	83	280	98	276	105	1026	55	167	-10.472	2.48167	49.4474	2.03758e-12	8.80017e-11	6.707581206513e-313	0	2.72685e-38	4.79794e-24	4.54148e-171	8.98464e-14	3.238	27.67	2.116	30.404	1.264	5.674	1.742	5.645	1.944	17.603	1.452	4.528	6	6+
9735	KNTC1	649	1383	374	1168	305	633	381	1020	189	945	393	789	-10.1631	1.46235	19.348	1.08936e-05	0.000124472	4.01823e-70	1.43233e-139	4.1669e-49	7.00159e-81	1.76465e-105	6.68383e-31	3.493	8.105	1.785	7.203	1.721	4.733	2.519	7.74	1.296	5.971	3.839	7.901	6	6+
891	CCNB1	146	498	119	694	91	180	124	305	50	462	102	275	-11.1569	1.90421	30.5959	3.17758e-08	6.12465e-07	4.46514e-50	7.12711e-131	8.93651e-14	6.0677e-22	1.83735e-75	2.94975e-19	2.877	10.643	2.092	15.665	1.868	4.93	2.966	8.405	1.249	10.724	3.633	10.071	6	6+
26585	GREM1	457	890	14	885	16	1605	278	3532	12	1751	26	162	-10.0061	4.56271	111.066	5.72454e-26	2.07169e-23	7.05828e-38	1.35976e-288	0	0	0	1.44348e-24	4.536	9.644	0.123	10.068	0.167	22.137	3.413	49.804	0.599	20.406	0.47	2.999	6	6+
1300	COL10A1	191	1792	11	1232	13	2405	48	897	16	8037	28	434	-9.55577	5.70312	174.227	8.83236e-40	1.68538e-36	0	0	0	5.5605e-222	0	1.16673e-93	2.268	23.123	0.116	16.756	0.161	39.674	0.696	14.958	0.241	112.184	0.602	9.582	6	6+
120224	TMEM45B	272	1448	325	3253	257	583	202	864	201	1254	282	629	-10.0121	2.17075	39.4842	3.30716e-10	9.36806e-09	1.60331e-208	0	3.59599e-51	1.35165e-111	2.03108e-164	1.067e-30	5.066	29.259	5.398	69.402	4.989	15.091	4.571	22.517	4.746	27.506	9.497	21.774	6	6+
4605	MYBL2	159	414	43	394	75	207	126	514	46	339	47	96	-11.3706	2.02896	33.4903	7.16208e-09	1.57746e-07	3.22733e-30	7.40881e-91	1.00457e-23	5.63561e-64	1.57063e-49	0.000109917	2.33	6.589	0.561	6.614	1.147	4.215	2.251	10.564	0.856	5.845	1.247	2.616	6	6+
3898	LAD1	563	1817	808	2765	312	1456	322	977	398	2062	150	512	-9.77406	1.94553	33.5147	7.07283e-09	1.55944e-07	3.96624e-169	0	7.12127e-248	2.12687e-90	5.47913e-236	8.68618e-47	7.812	27.387	9.977	43.949	4.521	28.073	5.449	19.02	7.013	33.655	3.768	13.209	6	6+
8507	ENC1	1131	12852	2169	5213	1180	3508	1829	3680	1146	4078	1366	3528	-8.54071	1.77793	27.5691	1.51578e-07	2.57413e-06	0	0	0	2.19029e-181	0	6.79431e-219	7.706	95.315	13.114	40.696	8.424	33.21	15.29	35.324	9.943	32.631	16.886	44.722	6	6+
26470	SEZ6L2	299	3478	638	1447	358	2010	367	666	429	3458	129	800	-9.62605	2.33631	44.4931	2.55255e-11	8.87052e-10	0	4.79956e-119	0	5.44931e-27	0	9.51453e-119	4.666	58.931	8.892	25.874	5.82	43.613	6.945	14.545	8.494	63.673	3.644	23.245	6	6+
151507	MSL3P1	27	171	42	354	27	203	23	116	14	216	22	99	-12.1301	2.89104	62.4003	2.80278e-15	1.94802e-13	1.59197e-28	5.19528e-79	1.0206e-44	1.84076e-17	3.32627e-43	2.23262e-12	0.564	3.874	0.783	8.472	0.587	5.895	0.583	3.387	0.371	5.318	0.831	3.844	6	6+
115908	CTHRC1	353	949	113	1025	55	1427	281	1926	33	4815	85	329	-9.97032	3.44587	78.6715	7.33447e-19	9.50311e-17	8.6146e-71	3.48645e-233	0	0	0	9.04824e-35	13.207	38.319	3.8	43.909	2.127	74.226	12.575	99.754	1.554	213.097	5.719	22.842	6	6+
149175	MANEAL	86	502	155	273	105	272	86	217	42	183	45	158	-11.6498	1.70571	24.9789	5.79625e-07	8.67783e-06	4.83618e-77	7.68765e-16	1.11402e-28	1.18321e-16	4.35649e-19	2.27305e-15	2.362	13.672	3.272	9.089	2.588	9.141	2.481	8.86	2.314	5.383	1.926	6.945	6	6+
999	CDH1	6087	14175	6572	13504	3559	23979	3688	10751	4255	17648	3790	8848	-7.6422	1.66381	24.4531	7.6141e-07	1.10679e-05	0	0	0	0	0	0	48.27	122.31	46.265	122.688	29.555	264.2	35.848	120.026	42.945	164.391	54.507	130.522	6	6+
80164	FLJ22184	80	380	130	236	114	266	72	187	101	342	33	146	-11.6674	1.63629	23.1999	1.46005e-06	2.01621e-05	6.94576e-51	2.42507e-14	6.70209e-25	6.65484e-15	1.63797e-26	1.37468e-17	0.679	3.508	0.979	2.294	1.013	3.136	0.748	2.233	1.09	3.409	0.508	2.304	6	6+
991	CDC20	88	338	41	454	27	132	92	236	26	131	35	73	-11.8885	2.10276	34.7882	3.67597e-09	8.57317e-08	4.02318e-38	1.84493e-111	1.62357e-23	3.52802e-18	1.0818e-15	0.000637235	2.226	9.259	0.928	13.154	0.71	4.641	2.812	8.322	0.832	3.909	1.598	3.43	6	6+
1469	CST1	74	513	0	261	1	474	5	76	0	206	0	137	-11.8452	6.07821	159.383	1.54368e-36	1.90599e-33	4.41986e-87	5.69869e-85	1.20617e-155	2.68235e-18	1.08537e-57	6.25528e-41	5.277	38.991	0	21.272	0.073	46.938	0.415	7.32	0	17.422	0	17.967	6	6+
1301	COL11A1	21	237	12	880	31	1138	63	1442	2	21300	17	240	-9.16906	5.45101	165.481	7.18168e-38	1.00496e-34	6.698e-50	8.65872e-287	0	0	0	9.66884e-51	0.12	2.96	0.122	9.2	0.186	12.853	0.441	12.602	0.015	177.507	0.177	3.628	6	6+
23321	TRIM2	1180	7390	1793	4126	423	3777	1072	2243	793	3071	915	2108	-8.93866	1.89095	30.4948	3.3477e-08	6.42893e-07	0	0	0	1.53568e-119	3.86416e-268	6.06497e-108	6.675	45.515	8.995	26.742	2.508	29.684	7.447	19.03	5.844	20.395	9.393	22.187	6	6+
3149	HMGB3	661	4655	348	1418	442	873	635	3076	307	3255	307	7655	-9.13959	2.7083	58.0106	2.60708e-14	1.52856e-12	0	3.78024e-212	4.16283e-62	0	0	0	7.252	55.524	3.394	17.823	5.071	13.309	8.518	47.429	4.282	41.979	6.103	156.194	6	6+
81607	PVRL4	460	1798	307	1574	223	1183	252	948	302	2477	194	1067	-9.92404	2.39769	49.2098	2.29993e-12	9.81019e-11	3.43139e-203	2.52984e-274	4.95147e-217	1.60038e-109	0	4.78788e-146	5.103	21.683	3.027	20.003	2.587	18.235	3.417	14.778	4.259	32.301	3.899	22.012	6	6+
10551	AGR2	1060	14742	1259	8862	591	4464	459	862	500	1269	541	9071	-8.5253	2.71699	55.2819	1.04425e-13	5.52112e-12	0	0	0	1.51138e-37	1.51284e-61	0	52.832	790.236	56.701	505.589	30.278	309.392	27.088	59.059	31.228	75.037	48.317	838.08	6	6+
59084	ENPP5	151	578	286	522	113	495	332	795	333	964	327	862	-10.5516	1.55505	21.5827	3.38889e-06	4.35596e-05	2.012e-64	3.64221e-31	1.36162e-81	6.02778e-54	1.83485e-58	4.90655e-56	2.037	8.471	3.433	8.067	1.592	9.279	5.465	15.051	5.706	15.297	7.988	21.623	6	6+
100499467	LOC100499467	89	523	24	472	20	124	19	87	12	200	19	185	-11.729	3.19438	73.2203	1.15958e-17	1.25462e-15	2.50215e-80	9.7858e-134	4.26219e-25	1.11669e-12	7.27752e-41	1.20896e-34	1.601	10.211	0.385	9.728	0.375	3.101	0.416	2.191	0.274	4.237	0.618	6.187	6	6+
5820	PVT1	103	277	16	688	45	189	40	79	29	106	18	70	-11.7714	2.18513	34.8468	3.56691e-09	8.34664e-08	2.96982e-21	1.88683e-219	8.19747e-31	0.000218267	9.37735e-10	5.01685e-08	2.256	6.575	0.313	17.256	1.026	5.752	1.061	2.416	0.804	2.736	0.712	2.848	6	6+
3866	KRT15	336	4445	47	1649	145	2964	381	8835	170	424	55	378	-9.2911	3.75154	93.2835	4.53146e-22	9.32504e-20	0	0	0	0	7.71006e-21	1.94544e-59	7.622	109.268	0.952	42.844	3.422	93.45	10.465	279.785	4.881	11.338	2.253	15.932	6	6+
30001	ERO1L	1206	2317	762	4913	419	1336	813	4540	619	3374	649	1830	-9.15245	2.00059	34.2166	4.93061e-09	1.12615e-07	5.33965e-94	0	1.59439e-169	0	0	3.9225e-130	14.191	29.635	7.973	66.23	5.154	21.845	11.689	75.046	9.257	46.679	13.835	40.045	6	6+
2048	EPHB2	371	929	234	746	137	994	297	626	113	564	79	299	-10.5939	1.89075	30.5632	3.23173e-08	6.2176e-07	2.43711e-62	2.52906e-91	2.29536e-213	1.26381e-34	1.02001e-63	1.75197e-30	4.943	12.027	3.222	7.052	1.301	11.259	2.887	6.985	1.138	5.438	1.133	4.391	6	6+
5169	ENPP3	77	1147	80	2815	40	227	51	413	20	581	94	254	-10.5206	3.51779	85.6198	2.18079e-20	3.49425e-18	1.91904e-258	0	9.76989e-44	2.20906e-78	4.34803e-132	5.99096e-18	0.954	15.445	0.882	39.958	0.518	3.908	0.772	7.186	0.315	8.465	2.11	5.852	6	6+
7105	TSPAN6	836	3888	630	2811	478	1217	492	885	448	1302	473	1782	-9.55419	1.71301	26.1178	3.21212e-07	5.11552e-06	0	0	1.84224e-122	1.11706e-34	3.36215e-79	1.48543e-178	16.768	84.566	11.275	64.579	9.986	33.923	11.974	24.817	11.385	30.764	17.146	66.421	6	6+
27347	STK39	552	1237	488	2047	365	1185	465	978	361	898	431	1161	-9.95899	1.49665	20.1228	7.26269e-06	8.58839e-05	4.81028e-69	1.52309680631340e-312	6.55843e-153	5.23013e-53	2.66907e-42	2.73044e-77	6.595	16.062	5.184	28.016	4.558	19.671	6.786	16.411	5.481	12.614	9.327	25.793	6	6+
11004	KIF2C	75	441	31	443	54	124	115	241	35	184	55	113	-11.6306	2.01939	32.2277	1.37124e-08	2.84974e-07	1.5159e-68	4.11648e-116	1.23419e-11	1.21611e-13	3.32789e-22	2.09423e-05	1.03	6.579	0.379	6.969	0.775	2.366	1.926	4.644	0.61	2.972	1.367	2.885	6	6+
84706	GPT2	159	931	230	985	170	737	170	369	123	997	84	502	-10.7906	2.29257	44.4194	2.6505e-11	9.13532e-10	5.08111e-143	6.15945e-153	1.53504e-119	6.45657e-22	1.07519e-152	2.88825e-73	1.707	10.867	2.195	12.115	1.909	10.994	2.232	5.568	1.679	12.581	1.634	10.023	6	6+
388228	SBK1	126	1236	180	924	154	878	146	429	174	564	59	190	-10.8662	2.22775	41.2018	1.37295e-10	4.18261e-09	3.77172e-243	3.195e-161	2.00517e-168	1.31892e-38	1.5368e-40	1.18363e-16	0.958	10.227	1.215	8.049	1.226	9.275	1.361	4.593	1.684	5.037	0.814	2.687	6	6+
23213	SULF1	1401	3363	1604	4734	1680	6414	1960	12069	1187	16775	735	4482	-8.455	2.34405	45.763	1.33459e-11	4.91458e-10	1.86504e-208	0	0	0	0	0	10.196	26.636	10.36	39.473	12.807	64.856	17.494	123.705	10.998	143.384	9.703	60.682	6	6+
56649	TMPRSS4	207	2173	9	3388	7	1079	70	1096	18	715	3	2235	-10.0896	6.0849	189.856	3.41803e-43	1.1835e-39	0	0	0	6.96548e-259	8.57341e-170	0	4.043	70.822	0.099	133.672	0.091	18.622	1.075	19.369	0.806	17.324	0.068	51.964	6	6+
55103	RALGPS2	455	848	272	912	105	238	233	858	213	1019	222	472	-10.7216	1.5512	21.3396	3.84705e-06	4.86443e-05	6.57727e-33	6.47303e-117	1.58794e-21	3.14026e-97	2.26445e-109	2.84778e-21	2.947	5.979	1.563	6.768	0.713	2.142	1.852	7.83	1.757	7.75	2.609	5.687	6	6+
27286	SRPX2	356	803	348	1273	248	744	284	2159	165	1458	148	1142	-10.2762	2.32181	44.678	2.32247e-11	8.11125e-10	1.28859e-45	2.18991e-175	5.86517e-90	0	3.87722e-232	1.34669e-190	6.634	16.234	5.783	27.173	4.817	19.268	6.429	56.296	3.898	31.997	4.987	39.553	6	6+
51809	GALNT7	703	3733	841	3927	340	2085	623	1304	409	1480	598	2402	-9.08867	2.07022	37.0251	1.16619e-09	3.00347e-08	0	0	0	5.72828e-70	1.70676e-120	6.72136e-256	6.228	35.972	6.616	39.855	3.153	25.663	6.759	16.254	4.61	15.404	9.605	39.579	6	6+
2118	ETV4	63	920	85	1185	96	970	100	367	61	609	52	373	-10.4181	3.22258	79.4545	4.93465e-19	6.55559e-17	6.93563e-206	#NUM!	5.01326e-236	5.77659e-42	2.21135e-103	5.07115e-60	1.163	18.419	1.399	25.048	1.846	24.876	2.242	9.477	1.427	13.234	1.735	12.793	6	6+
1356	CP	3126	18819	309	9708	293	1710	754	7570	323	27047	677	45197	-7.25391	4.35358	122.928	1.44576e-28	7.87775e-26	0	0	0	0	0	0	30.811	202.273	2.695	109.644	3.035	23.414	9.17	105.524	4.064	312.556	12.129	829.231	6	6+
1104	RCC1	653	2028	537	1168	418	1804	478	966	340	1355	256	700	-9.63163	1.59202	22.8133	1.78522e-06	2.42535e-05	3.52884e-180	1.0003e-90	3.73838e-291	7.7059e-49	2.96843e-122	7.95011e-48	11.042	37.22	8.086	22.624	7.375	42.39	9.846	22.896	7.294	26.955	7.83	21.993	6	6+
50512	PODXL2	167	971	123	274	94	688	153	274	90	948	23	143	-10.6289	2.28247	41.5736	1.13518e-10	3.54047e-09	5.42713e-148	4.52524e-23	7.58664e-149	2.58532e-11	1.08404e-163	9.30333e-22	3.17	19.991	2.082	5.957	1.859	18.147	3.527	7.275	2.165	21.19	0.789	5.044	6	6+
6495	SIX1	106	638	35	1136	28	171	36	294	59	906	30	863	-10.5431	3.69498	96.3974	9.399e-23	2.24187e-20	2.73143e-99	0	3.62397e-34	7.35392e-56	2.67922e-177	9.63471e-214	1.582	10.339	0.465	19.418	0.436	3.546	0.655	6.151	1.118	15.906	0.81	23.941	6	6+
2256	FGF11	50	330	36	155	24	169	30	361	13	437	17	291	-11.3535	3.4066	83.0225	8.11262e-20	1.16633e-17	1.30824e-54	7.25054e-25	1.51588e-36	4.23131e-79	3.32099e-101	1.21037e-64	0.723	5.185	0.464	2.569	0.363	3.397	0.529	7.325	0.239	7.437	0.445	7.827	6	6+
1894	ECT2	393	783	304	1727	148	383	257	458	219	693	312	730	-10.1448	1.46378	18.9327	1.35415e-05	0.000150548	2.64174e-35	4.77183422722851e-319	3.93323e-40	4.87872e-18	5.416e-48	4.41107e-39	3.886	8.419	2.67	19.562	1.531	5.262	3.11	6.368	2.754	8.052	5.591	13.424	6	6+
6712	SPTBN2	430	1842	328	2531	348	883	232	1027	158	1202	51	579	-9.73925	2.52542	52.6966	3.89256e-13	1.84435e-11	4.93943e-225	0	1.80228e-88	3.87243e-136	3.55638e-177	1.45729e-114	2.035	9.493	1.376	13.723	1.727	5.805	1.349	6.855	0.953	6.676	0.438	5.098	6	6+
347735	SERINC2	673	4015	1227	4184	766	2646	649	1504	724	1822	210	755	-9.04855	1.79651	28.5966	8.91395e-08	1.57362e-06	0	0	0	4.97347e-96	2.35893e-86	1.8727e-72	15.162	98.023	24.691	107.961	17.954	82.849	17.705	47.305	20.647	48.384	8.544	31.603	6	6+
3486	IGFBP3	2443	6796	4413	7416	1876	3943	1856	3953	1222	15901	1127	2658	-8.02053	1.5617	21.3712	3.78419e-06	4.79361e-05	0	0	8.43315e-306	2.31892e-217	0	1.15046e-141	37.993	115.376	60.873	132.215	30.635	85.237	35.598	87.155	24.319	290.647	31.94	77.144	6	6+
80307	FER1L4	387	1342	102	1669	116	515	151	827	22	685	29	318	-10.1836	3.14849	73.6679	9.24304e-18	1.01577e-15	3.95577e-135	0	7.04372e-85	6.65035e-127	4.51777e-157	9.87026e-62	2.205	8.323	0.515	10.893	0.693	4.076	1.057	6.639	0.16	4.58	0.3	3.369	6	6+
8645	KCNK5	497	1938	659	1598	420	2333	392	1501	657	2931	301	2702	-9.23401	2.19831	41.346	1.27533e-10	3.91362e-09	1.97755e-218	2.72763e-143	0	1.0249e-175	4.83584e-295	0	5.076	21.521	5.98	18.696	4.487	33.105	4.898	21.552	8.532	35.179	5.571	51.321	6	6+
7022	TFAP2C	222	483	142	284	120	258	108	257	186	1467	166	295	-11.1643	1.41323	17.5183	2.84558e-05	0.000294957	1.96976e-26	2.72266e-20	1.60165e-21	9.24812e-18	1.33377e-220	3.52117e-09	3.05	7.208	1.736	4.469	1.722	4.925	1.81	4.954	3.245	23.706	4.129	7.535	6	5+
2650	GCNT1	277	833	335	1488	272	414	276	393	236	1828	190	1057	-10.5196	1.75969	26.2892	2.93927e-07	4.72398e-06	9.49594e-72	1.97776e-236	2.15906e-18	3.31442e-08	4.44363e-272	8.09355e-146	1.971	6.449	2.115	12.128	3.189	8.352	3.164	3.938	2.137	15.272	2.452	13.989	6	5+
26472	PPP1R14B	557	938	440	1095	542	1229	666	1292	508	1669	254	870	-10.239	1.32458	16.0425	6.1937e-05	0.00059249	7.28621e-28	4.12455e-102	1.13568e-106	1.02444e-59	2.6495e-120	5.54013e-79	26.237	47.555	18.706	59.043	26.274	80.496	37.228	83.786	30.015	93.208	21.456	75.982	6	5+
114822	RHPN1	341	1456	408	2028	274	372	225	531	164	2299	36	127	-10.4361	1.98754	32.5155	1.18246e-08	2.49196e-07	6.25099e-178	0	1.53969e-12	1.42277e-35	0	1.35634e-12	3.487	16.192	3.708	23.761	2.931	5.286	2.815	7.635	2.133	27.633	0.667	2.416	6	5+
23042	PDXDC1	2773	9040	3791	8712	2681	8879	2220	2793	2430	11214	1905	4358	-8.44009	1.43846	18.6954	1.53355e-05	0.000168795	0	0	0	2.59027e-30	0	3.83165e-219	27.7	98.724	33.49	99.724	28.207	123.158	27.486	39.649	31.13	131.41	34.734	81.268	6	5+
2762	GMDS	219	311	212	686	251	567	161	412	160	471	135	517	-11.1361	1.41721	17.8032	2.44971e-05	0.000258129	6.97133e-06	4.55028e-85	1.65814e-49	2.64913e-31	1.24064e-29	3.16545e-53	5.537	8.514	4.793	19.862	6.594	19.923	4.917	14.518	5.115	14.044	6.159	24.278	6	5+
118932	ANKRD22	301	463	19	702	160	582	30	284	33	294	114	773	-11.2245	2.79209	55.8412	7.85684e-14	4.26137e-12	6.57843e-11	3.71267e-220	3.64153e-83	9.89121e-58	1.8437e-47	6.40875e-121	2.95	4.948	0.165	7.883	1.648	7.923	0.363	3.936	0.413	3.378	2.031	14.1	6	5+
1364	CLDN4	2739	5561	3330	8893	1485	3555	1103	4167	1868	5330	711	1352	-8.95235	1.38279	17.4845	2.89654e-05	0.000299352	1.36755e-252	0	0	0	7.29226585974322e-312	8.11055e-46	62.728	137.998	68.128	233.262	35.377	113.153	30.578	133.202	54.145	143.892	29.404	57.526	6	5+
5328	PLAU	2494	1383	1002	2795	1322	2601	1602	5746	814	8868	1109	6406	-9.05612	1.68315	22.2215	2.42933e-06	3.21511e-05	2.67477e-57	7.47657e-296	3.79625e-182	0	0	0	45.218	27.322	16.177	58.069	25.098	65.463	35.736	147.56	18.872	189.024	36.613	216.583	6	5+
55366	LGR4	263	2669	575	3623	275	2263	367	445	385	1721	246	1423	-9.98647	2.41096	45.9607	1.20646e-11	4.49001e-10	0	0	0	0.000123005	9.91404e-174	7.73607e-202	1.904	21.029	3.694	30.051	2.086	22.763	3.259	4.537	3.548	14.633	3.231	19.165	6	5+
11015	KDELR3	87	333	125	268	70	251	114	173	44	240	41	169	-11.9939	1.69963	24.5648	7.18513e-07	1.05356e-05	1.68927e-37	2.5643e-21	1.08208e-35	6.59222e-05	2.28493e-29	4.69694e-19	6.426	26.279	8.429	22.647	5.558	25.793	9.78	17.331	4.359	23.798	6.72	23.093	6	5+
55765	C1orf106	559	2526	426	3114	293	1447	143	476	253	1061	312	555	-10.2308	2.04263	35.321	2.79594e-09	6.66139e-08	0	0	9.01773e-255	2.2033e-49	6.50046e-101	3.28982e-16	5.745	26.822	3.695	35.75	2.993	22.541	2.284	6.536	4.512	18.153	5.522	10.079	6	5+
90861	HN1L	1691	5838	1501	3672	1159	4246	1314	1357	1091	4298	978	2767	-9.24532	1.46354	19.0821	1.25215e-05	0.000140699	0	0	0	0.00176601	0	8.74521e-197	17.747	66.62	14	44.15	12.723	61.918	16.867	20.021	14.559	53.018	18.601	54.009	6	5+
51361	HOOK1	527	1200	402	1919	228	934	273	545	386	1437	581	706	-10.4311	1.48325	19.0734	1.25786e-05	0.000141084	6.75447e-69	0	8.99733e-146	3.34946e-27	7.76314e-121	0.000848219	3.394	8.413	2.297	14.161	1.539	8.358	2.158	4.946	3.166	10.868	6.79	8.46	6	5+
1945	EFNA4	37	254	76	139	51	211	56	117	40	185	26	97	-12.3897	1.84922	27.9804	1.22549e-07	2.11364e-06	6.61289e-43	4.15136e-09	1.02257e-33	3.19609e-07	2.75755e-20	2.23246e-10	2.124	17.49	3.354	7.462	5.223	19.104	4.921	9.725	2.689	11.898	2.516	10.803	6	5+
1365	CLDN3	836	2353	603	3181	406	1116	135	939	498	1428	44	84	-10.2339	1.81185	27.8236	1.32892e-07	2.27707e-06	7.20836e-185	0	2.64215e-122	1.04083e-165	3.84872e-85	0.00101215	28.823	87.622	18.664	125.579	14.486	53.489	5.581	44.891	21.638	58.197	2.73	5.375	6	5+
130367	SGPP2	628	1312	185	1247	92	2380	247	994	442	808	127	517	-10.492	2.19889	36.7441	1.347e-09	3.41055e-08	4.93499e-64	6.13969e-251	0	7.91344e-122	4.84775e-18	2.21396e-56	24.409	55.012	6.467	55.493	3.694	128.61	11.47	53.439	21.615	37.162	8.873	37.284	6	5+
29841	GRHL1	228	922	349	739	181	238	105	374	134	383	174	793	-11.1565	1.54724	21.1074	4.34238e-06	5.40929e-05	2.11913e-107	1.80785e-55	1.24366e-07	2.15649e-41	2.22312e-23	9.99074e-95	2.461	10.82	3.348	9.138	2.043	3.57	1.386	5.674	1.839	4.859	3.403	15.919	6	5+
57486	NLN	418	919	374	1354	251	707	327	480	228	915	268	894	-10.7219	1.50733	20.2979	6.62725e-06	7.91274e-05	1.21731e-49	1.93555e-184	4.93504e-80	6.23894e-11	9.16154e-84	2.95511e-79	1.792	4.292	1.422	6.653	1.129	4.212	1.724	2.904	1.246	4.605	2.086	7.134	6	5+
4316	MMP7	3037	10224	342	24886	194	1116	306	2316	97	783	1041	1261	-8.86693	2.69593	51.324	7.8311e-13	3.55021e-11	0	0	2.67811e-214	0	2.80026e-119	6.53989e-06	125.204	454.401	12.694	1174.59	8.252	63.968	15.042	131.89	5.027	38.218	77.092	96.438	6	5+
54894	RNF43	204	974	653	1779	295	568	296	958	256	1129	136	241	-10.6735	1.59633	22.7278	1.86647e-06	2.52756e-05	4.41261e-130	1.1547e-183	3.01626e-39	1.4534e-95	3.57174e-113	1.138e-07	1.709	8.876	4.857	17.072	2.587	6.611	3.038	11.294	2.729	11.11	2.066	3.755	6	5+
54102	CLIC6	1971	15701	1084	6198	709	7987	569	914	681	11697	1154	2635	-8.74921	2.55907	50.1055	1.45696e-12	6.41124e-11	0	0	0	7.81453e-27	0	2.69068e-132	20.129	174.358	9.837	72.514	7.574	113.333	7.109	13.124	8.844	140.392	21.359	50.048	6	5+
9547	CXCL14	855	1772	202	511	102	3973	176	1094	101	6415	142	229	-9.94143	2.72866	48.1954	3.85788e-12	1.55985e-10	6.59529e-85	5.14123e-49	0	1.86719e-181	0	1.14839e-05	17.949	40.329	3.785	12.287	2.229	115.912	4.48	32.091	2.685	158.677	5.386	8.933	6	5+
29760	BLNK	201	304	121	348	87	168	124	465	67	207	108	218	-11.6647	1.31096	15.0894	0.000102535	0.00092928	3.23599e-07	9.07057e-39	2.62289e-12	4.82486e-54	2.17723e-14	1.67659e-09	5.805	9.65	4.593	12.36	2.96	6.011	6.801	20.063	2.392	11.405	5.085	10.511	6	5+
5832	ALDH18A1	1328	3057	1227	2932	812	2155	1206	1866	802	2818	664	1690	-9.52444	1.31755	16.0209	6.26462e-05	0.000598396	6.14091e-177	2.35477e-257	2.15279e-226	8.80704e-48	2.29684e-220	9.79441e-103	15.124	37.993	12.385	38.274	9.713	34.108	16.942	30.105	11.679	37.691	13.77	35.89	6	5+
84102	SLC41A2	434	1340	279	1188	136	286	176	379	181	739	333	569	-10.7492	1.49014	19.819	8.5134e-06	9.96633e-05	1.51229e-118	6.66251e-184	2.80635e-23	4.9684e-22	8.54157e-69	8.99763e-15	4.773	16.022	2.728	14.969	1.564	4.371	2.367	5.858	2.531	9.554	6.636	11.638	6	5+
10112	KIF20A	56	337	46	458	28	131	146	246	34	302	43	105	-11.8891	2.25922	39.6235	3.07953e-10	8.78252e-09	9.04559e-53	7.5492e-108	1.62357e-23	9.6117e-09	8.39127e-49	8.96854e-07	0.631	4.126	0.461	5.91	0.33	2.05	2.01	3.893	0.487	3.999	0.877	2.199	6	5+
22801	ITGA11	230	362	239	516	92	1381	176	588	100	4571	51	144	-10.4135	2.348	39.1141	3.99742e-10	1.11134e-08	1.60499e-09	3.07193e-40	0	1.00594e-60	0	5.71306e-11	1.74	2.98	1.605	4.471	0.729	14.513	1.632	6.263	0.963	40.608	0.7	2.026	6	5+
2517	FUCA1	2877	8127	2195	3484	1920	8348	1880	4911	1416	2347	1340	3603	-8.79936	1.34222	16.1693	5.79249e-05	0.000558752	0	6.2668e-149	0	0	8.36388e-35	7.41909e-238	55.719	170.716	37.92	77.287	38.741	224.686	44.205	133.026	34.755	53.538	46.911	129.682	6	5+
27293	SMPDL3B	211	1341	206	387	262	1156	170	423	151	752	99	229	-10.8637	1.80403	28.1068	1.148e-07	1.99145e-06	4.90125e-215	3.2635e-24	4.49171e-190	1.20198e-30	9.55174e-84	1.86735e-12	15.114	63.506	10.953	17.259	12.787	73.149	7.911	23.801	9.269	42.908	6.932	16.55	6	5+
55785	FGD6	943	4116	1118	2428	572	1303	739	1158	725	2543	1147	2270	-9.55625	1.35325	16.7735	4.21169e-05	0.000420768	0	1.15864e-186	1.38867e-113	3.01398e-31	2.45758e-198	3.42559e-84	3.767	17.912	3.959	11.114	2.397	7.232	3.631	6.528	3.692	11.923	8.32	16.876	6	5+
54997	TESC	116	200	102	382	151	482	141	273	80	262	41	238	-11.6005	1.63126	22.6846	1.90892e-06	2.57839e-05	3.4439e-07	3.3324e-54	5.43013e-62	2.07308e-13	2.00157e-19	3.4763e-34	14.121	27.685	14.816	47.023	18.268	79.514	10.962	24.564	8.018	32.643	10.05	40.934	6	5+
7162	TPBG	483	1104	555	1267	288	414	365	653	286	1974	247	610	-10.3942	1.3395	16.1377	5.88995e-05	0.000567371	9.15574e-64	3.01588e-105	3.74282e-16	1.01115e-25	1.47253e-275	9.55073e-36	6.893	17.113	7.05	20.713	4.292	8.21	6.351	13.072	5.183	33.141	6.381	16.185	6	5+
374393	FAM111B	51	278	11	188	18	92	75	119	13	282	76	185	-12.1761	2.50138	44.8926	2.0814e-11	7.30577e-10	2.0346e-41	4.40521e-52	4.86085e-17	0.000407512	1.40497e-60	3.8038e-11	0.603	3.573	0.116	5.234	0.223	2.219	2.403	2.228	0.575	4.488	1.84	4.064	6	5+
57549	IGSF9	41	443	136	356	136	282	72	234	90	277	25	100	-11.7191	1.88372	29.541	5.47463e-08	1.008e-06	2.63766e-90	4.9094e-36	1.93354e-22	6.84047e-24	3.79224e-19	2.36572e-11	0.592	6.509	2.031	8.371	2.072	7.463	0.875	3.269	2.077	3.209	0.449	3.833	6	5+
5163	PDK1	379	677	213	715	211	543	233	1025	172	659	224	658	-10.7619	1.63957	23.778	1.08113e-06	1.52815e-05	6.57161e-24	1.28746e-91	9.31824e-56	3.20848e-135	1.59584e-57	9.37673e-50	3.172	6.165	1.583	6.857	1.849	6.315	2.39	12.076	1.832	6.48	3.4	10.245	6	5+
346389	MACC1	1143	2987	917	2697	581	4120	506	803	668	2644	615	1854	-9.53174	1.69589	25.09	5.4716e-07	8.25064e-06	1.60165e-211	6.36679e-302	0	7.90048e-23	1.092e-236	7.91236e-144	4.629	13.176	3.291	12.514	2.468	23.179	2.52	4.588	3.448	12.565	4.522	13.971	6	5+
65983	GRAMD3	488	1701	425	893	334	615	231	307	258	1170	375	1919	-10.3388	1.49365	19.8017	8.59051e-06	0.00010051	5.20879e-172	5.43711e-66	3.41228e-39	4.25768e-05	6.37601e-120	3.80675e-250	8.884	33.777	6.876	18.635	6.374	15.565	8.421	7.882	7.249	25.08	12.424	65.22	6	5+
5002	SLC22A18	211	742	330	609	211	721	242	309	144	520	51	451	-10.7576	1.6603	23.3994	1.31618e-06	1.83444e-05	2.55438e-76	1.27377e-36	4.77524e-98	0.000186072	4.43015e-43	4.48862e-80	6.329	24.071	8.87	20.92	6.563	30.064	8.736	12.886	5.453	18.419	2.757	25.12	6	5+
6819	SULT1C2	442	1312	208	683	114	607	128	240	59	805	204	628	-10.5788	2.02119	34.032	5.42119e-09	1.22356e-07	1.32443e-110	3.90738e-86	9.04691e-112	4.54881e-11	2.52765e-152	1.64153e-50	8.534	22.544	2.913	12.311	1.979	15.275	2.809	5.36	1.191	14.939	5.868	18.507	6	5+
150696	PROM2	166	1221	217	1467	115	674	150	256	158	3474	63	1099	-10.0669	2.99115	66.9246	2.821e-16	2.42675e-14	1.28581e-211	1.98472e-296	5.46643e-131	1.55202e-09	0	1.65373e-245	2.497	20.173	3.608	25.495	1.905	14.099	3.086	5.368	3.008	61.737	2.738	54.569	6	5+
64063	PRSS22	129	526	151	293	84	383	47	143	88	166	56	159	-11.471	1.57467	21.1313	4.28871e-06	5.35197e-05	9.31156e-63	7.06614e-20	2.32488e-64	8.56137e-14	6.70959e-05	4.22646e-12	4.157	18.319	4.364	10.812	2.804	17.157	1.819	6.398	3.577	6.32	3.25	9.512	6	5+
4085	MAD2L1	74	155	31	249	36	66	82	177	32	200	69	115	-12.0192	1.58627	20.3223	6.54347e-06	7.82161e-05	1.11991e-08	3.49052e-55	3.21565e-05	9.82823e-11	5.9872e-27	0.00172482	2.259	5.117	0.848	8.706	1.139	2.801	3.012	7.51	1.233	7.211	3.796	6.519	6	5+
55876	GSDMB	397	1386	209	1850	364	802	284	421	153	878	172	521	-10.2643	1.82453	28.2524	1.06482e-07	1.85482e-06	1.15947e-140	0	2.50911e-67	4.04227e-10	6.87088e-109	2.67844e-41	11.484	44.706	5.311	61.518	11.298	32.284	10.625	18.093	5.865	29.825	9.346	35.883	6	5+
92291	CAPN13	540	1367	534	3459	374	827	191	257	278	644	225	3659	-9.75667	1.80308	26.0463	3.33319e-07	5.30027e-06	1.00495e-92	0	7.74965e-70	0.000120151	1.74569e-26	0	8.048	22.124	7.085	59.052	5.819	17.127	3.469	5.371	5.259	11.292	6.069	101.38	6	5+
51351	ZNF117	415	2047	717	2008	266	586	513	599	265	1907	645	2459	-9.88327	1.70583	25.232	5.08311e-07	7.71472e-06	4.61007e-279	1.02633e-213	2.66526e-49	6.54912e-05	1.97564e-272	5.42616e-249	2.612	14.05	3.993	14.482	1.759	5.124	3.984	5.332	2.129	14.073	7.379	28.81	6	5+
113130	CDCA5	83	263	40	361	47	127	105	264	47	204	62	102	-11.8696	1.76261	25.5087	4.404e-07	6.75236e-06	5.75496e-25	7.30805e-83	1.00158e-14	7.003e-20	8.6056e-21	0.00424867	1.285	4.422	0.552	6.404	0.76	2.733	1.981	5.731	0.924	3.718	1.738	2.937	6	5+
3231	HOXD1	89	476	51	116	33	359	49	76	97	974	77	167	-11.4616	2.05562	32.7537	1.04606e-08	2.22912e-07	2.52745e-69	1.41579e-10	1.86705e-89	0.00761716	1.58475e-164	2.38427e-08	1.869	10.83	0.955	2.789	0.722	10.473	1.248	2.227	2.577	24.069	2.918	6.508	6	5+
6513	SLC2A1	1541	2632	326	3152	458	1096	489	2215	665	2255	206	1715	-9.58475	2.0873	35.5969	2.4267e-09	5.89543e-08	4.88677e-79	0	4.05152e-102	1.05603e-297	1.06444e-168	5.18122e-297	16.265	30.201	3.057	38.111	5.057	16.072	6.313	32.853	8.922	27.965	3.939	33.653	6	5+
148808	MFSD4	321	1568	584	1897	466	2293	540	638	494	1805	381	1178	-9.90458	1.72089	25.664	4.06333e-07	6.29907e-06	1.58314e-212	1.41787e-234	0	1.84563e-05	6.3671e-148	1.05466e-94	3.01	15.993	4.865	20.38	4.573	29.876	6.199	8.416	5.893	19.889	6.477	20.547	6	5+
222643	UNC5CL	168	435	68	241	101	146	63	408	56	425	51	355	-11.4801	2.06527	34.7578	3.7338e-09	8.69838e-08	2.04702e-31	8.99734e-33	1.86438e-06	5.10824e-70	5.15175e-63	2.94304e-56	2.12	5.964	0.763	3.483	1.332	2.56	0.97	7.227	0.898	6.305	1.165	8.328	6	5+
481	ATP1B1	3958	21823	5154	9195	2898	13786	3294	3448	3321	8973	4382	11730	-7.78082	1.45137	18.3495	1.83868e-05	0.000199245	0	0	0	9.66717e-09	0	0	73.758	440.726	85.429	196.196	56.331	356.834	74.603	89.682	78.253	196.413	147.249	405.18	6	5+
162461	TMEM92	51	230	115	212	63	288	56	115	142	210	53	172	-11.7675	1.46161	17.9042	2.32304e-05	0.00024639	2.42715e-30	2.82863e-13	2.68777e-49	1.40649e-06	0.00986743	2.67211e-15	0.756	3.703	1.518	3.6	0.975	5.932	1.012	2.39	2.672	3.663	1.422	4.74	6	5+
401647	GOLGA7B	113	160	120	356	104	247	60	396	45	508	57	372	-11.3708	2.0893	34.6433	3.96003e-09	9.14424e-08	0.00157641	5.96596e-41	1.87958e-23	7.96978e-68	2.87924e-90	7.74166e-57	1.554	2.389	1.468	5.607	1.494	4.719	1.006	7.637	0.785	8.213	1.418	9.506	6	5+
5450	POU2AF1	995	731	85	967	144	1304	295	2424	26	183	71	438	-10.2658	2.62017	48.1922	3.86432e-12	1.55985e-10	8.00719e-07	3.89062e-238	1.66473e-305	0	2.11023e-26	2.18496e-65	12.99	10.369	0.987	14.462	1.964	23.656	4.701	44.422	0.431	2.81	1.679	10.633	6	5+
1734	DIO2	192	330	52	489	20	576	81	379	13	1447	49	184	-10.964	3.20583	65.9476	4.63073e-16	3.82673e-14	3.47829e-11	8.67956e-114	3.77697e-177	1.19799e-52	0	5.66004e-19	1.223	2.298	0.293	3.57	0.134	5.097	0.638	3.428	0.106	10.828	0.57	2.19	6	5+
91319	DERL3	183	249	66	547	107	594	213	1255	36	272	32	192	-10.9815	2.41596	45.1225	1.85089e-11	6.54043e-10	0.000278437	2.50416e-121	3.54903e-112	1.40608e-201	1.44249e-40	2.58708e-28	14.246	26.186	5.488	48.996	7.88	55.149	22.681	127.246	3.232	24.959	4.76	32.474	6	5+
4072	EPCAM	1632	10645	3108	12004	1800	3282	1658	2635	2170	10271	3041	6414	-8.23044	1.62432	23.3196	1.37197e-06	1.90586e-05	0	0	2.73501e-201	7.53681e-73	0	2.02681e-273	40.324	284.856	68.655	339.689	46.227	112.71	49.517	90.782	67.815	299.288	135.613	294.396	6	5+
973	CD79A	432	309	60	658	56	346	236	1478	30	290	72	334	-10.8433	2.42559	42.3575	7.60233e-11	2.4512e-09	0.000385124	2.60978e-160	2.13988e-69	1.19626e-245	2.13777e-48	1.32328e-40	33.694	18.105	5.416	36.832	3.513	23.515	13.898	112.183	2.911	16.877	6.432	30.724	6	5+
6526	SLC5A3	794	1638	907	1211	340	1225	550	1460	432	5119	878	2910	-9.44205	1.69666	24.5442	7.26243e-07	1.06303e-05	1.14317e-77	5.1329e-33	1.78447e-173	2.13828e-114	0	1.60477e-253	2.53	5.687	2.56	4.422	1.137	5.423	2.157	6.566	1.755	19.135	5.08	17.252	6	5+
84000	TMPRSS13	34	180	79	129	54	134	48	144	82	159	31	148	-12.1017	1.56713	20.4247	6.2025e-06	7.48221e-05	9.42493e-27	4.48423e-07	3.81365e-14	1.20029e-13	5.45146e-05	6.7107e-19	1.324	7.67	2.759	5.764	2.197	7.265	2.279	7.948	4.108	7.359	2.216	10.861	6	5+
2706	GJB2	218	274	27	484	17	232	50	902	25	1747	23	108	-10.8895	3.60227	78.0767	9.91186e-19	1.25331e-16	0.00285929	1.16983e-133	1.36255e-61	3.22638e-221	0	7.34027e-14	3.786	5.165	0.418	9.629	0.308	5.6	1.056	21.936	0.551	35.721	0.723	3.487	6	5+
201266	SLC39A11	660	1446	542	2892	482	1490	367	903	379	1403	321	662	-9.83181	1.60521	22.8678	1.73536e-06	2.36835e-05	2.50991e-77	0	4.5625e-184	1.68288e-63	7.86478e-117	8.73344e-28	13.054	24.046	7.032	48.489	7.402	33.116	6.62	18.725	7.094	27.074	8.556	18.071	6	5+
55808	ST6GALNAC1	427	2943	136	2048	170	1822	164	1123	268	530	118	593	-9.94203	2.76992	58.1688	2.40558e-14	1.42234e-12	0	0	0	2.02209e-196	3.03842e-15	1.17043e-76	6.755	50.547	1.916	37.113	2.806	40.054	3.159	24.898	5.38	9.867	3.378	17.439	6	5+
56256	SERTAD4	99	330	173	373	92	144	109	226	97	622	129	202	-11.3243	1.35008	15.9699	6.43575e-05	0.000612884	6.56161e-33	2.02585e-29	1.78059e-07	1.22397e-12	9.66595e-84	0.000104905	2.032	7.344	3.169	8.769	1.966	4.108	2.714	6.484	2.522	15.042	4.785	7.705	6	5+
9066	SYT7	161	929	352	500	170	832	316	1695	127	782	49	244	-10.4607	2.16997	39.2324	3.76241e-10	1.05438e-08	2.01793e-141	5.646e-17	1.98383e-146	4.31922e-257	5.28218e-102	1.48645e-31	1.337	8.396	2.596	4.758	1.479	9.603	3.217	19.818	1.343	7.631	0.738	3.77	6	5+
23423	TMED3	1282	4343	1687	2665	1182	2070	884	1404	823	3536	470	1765	-9.18217	1.35853	16.832	4.08384e-05	0.000409946	0	6.49894e-113	2.89887e-118	3.38729e-39	0	2.61999e-176	39.748	145.577	46.886	94.619	37.985	89.214	32.957	60.48	32.198	129.485	26.253	101.602	6	5+
26298	EHF	2072	10330	2636	9587	777	4815	1089	1678	1602	6133	1983	8029	-8.561	1.9425	32.6418	1.10806e-08	2.35645e-07	0	0	0	2.10611e-42	0	0	15.391	83.741	17.359	81.623	6.061	49.704	9.978	17.662	15.221	53.521	26.83	111.247	6	5+
80775	TMEM177	30	145	78	126	38	102	40	67	36	115	11	48	-12.6667	1.50754	18.3548	1.83356e-05	0.000198794	1.37805e-20	9.78641e-07	8.34128e-12	0.00659471	3.32995e-09	2.5769e-06	1.043	5.446	2.435	5.017	1.367	4.931	2.026	3.23	1.578	4.728	0.688	3.098	6	5+
128434	VSTM2L	320	669	191	544	124	398	98	283	229	487	40	1003	-11.0091	1.86215	27.9104	1.27062e-07	2.18251e-06	3.24789e-33	8.3253e-60	3.95477e-51	2.54678e-25	4.83021e-17	1.87941e-242	6.606	14.974	3.519	12.863	2.665	11.419	2.454	8.165	5.988	11.845	1.492	38.476	6	5+
6696	SPP1	1269	938	60	2997	90	15598	181	1540	49	25986	182	24690	-8.18916	5.86524	142.908	6.15588e-33	5.16848e-30	4.7884e-08	0	0	1.7025e-297	0	0	150.399	87.558	8.477	403.034	8.953	2763.18	12.138	166.303	3.711	2533.13	21.757	2518.15	6	5+
9133	CCNB2	52	249	36	320	30	85	67	158	29	168	58	94	-12.1904	1.93046	29.575	5.37948e-08	9.96116e-07	2.706e-34	1.40643e-73	1.16623e-10	5.06288e-11	1.79071e-21	0.00806491	1.449	7.507	0.898	10.211	0.868	3.292	2.251	6.127	1.021	5.524	2.914	4.864	6	5+
7153	TOP2A	317	1918	138	2952	81	815	506	1647	105	1822	339	432	-10.0831	2.82459	56.9529	4.46366e-14	2.55295e-12	2.34143e-298	0	1.2022e-198	7.90877e-165	0	0.00158078	2.084	13.722	0.805	22.229	0.558	7.442	4.081	15.252	0.879	14.062	4.042	5.282	6	5+
6241	RRM2	182	431	54	645	63	194	191	593	51	441	183	256	-10.8144	1.96054	30.5841	3.19711e-08	6.15663e-07	5.58977e-27	2.24657e-161	1.29773e-24	7.86583e-57	6.99466e-70	0.000891902	2.176	5.602	0.574	8.836	0.788	3.224	2.79	9.961	0.775	6.201	3.964	5.693	6	5+
283209	PGM2L1	448	1125	301	1438	151	568	315	439	158	1497	237	2250	-9.81438	2.12994	36.8568	1.27133e-09	3.23851e-08	1.5166e-75	1.73338e-239	1.74278e-83	1.87189e-08	7.10374e-246	0	1.957	5.352	1.165	7.196	0.692	3.447	1.692	2.705	0.88	7.674	1.879	18.287	6	5+
10863	ADAM28	357	534	47	913	64	222	162	527	42	225	93	1029	-10.5648	2.39348	42.9236	5.69186e-11	1.86094e-09	2.49365e-11	3.21999e-257	5.3043e-31	3.78588e-53	5.02299e-27	3.17947e-200	11.081	15.103	1.098	27.316	3.364	8.061	5.109	19.181	1.387	6.934	4.383	49.93	6	5+
5347	PLK1	84	189	102	380	75	159	139	357	42	412	44	76	-11.2812	1.63443	22.3147	2.31426e-06	3.0764e-05	1.99171e-11	9.24877e-54	1.36371e-13	4.05977e-27	2.2731e-69	0.00801896	1.567	3.825	1.697	8.12	1.458	4.122	3.15	9.318	0.993	9.051	1.484	2.635	6	5+
10267	RAMP1	107	798	197	376	158	221	68	281	106	496	15	116	-10.9254	1.93888	30.8335	2.81142e-08	5.46912e-07	1.94911e-139	2.87534e-24	1.89204e-08	5.12632e-36	1.27228e-52	5.97243e-20	5.941	47.582	9.909	23.896	8.996	17.067	4.45	21.38	7.36	32.72	1.49	11.934	6	5+
699	BUB1	115	353	93	522	40	183	125	469	38	223	93	155	-11.1243	1.95922	31.7653	1.73975e-08	3.51371e-07	9.11243e-32	4.42573e-96	2.25075e-31	1.84665e-54	3.78068e-29	0.000222514	1.28	4.272	0.92	6.656	0.466	2.83	1.701	7.336	0.538	2.918	1.876	3.209	6	5+
116028	C16orf75	60	189	34	212	30	120	27	64	30	337	42	78	-11.8022	2.02947	32.0235	1.52319e-08	3.12835e-07	2.54525e-18	8.84219e-42	1.40057e-19	4.48078e-05	4.6767e-60	0.00244621	1.818	6.193	0.923	7.356	0.942	5.054	0.984	2.695	1.147	12.058	2.293	4.388	6	5+
1728	NQO1	276	645	208	1758	252	1020	137	60	174	1034	90	702	-10.1528	1.92442	27.5076	1.5648e-07	2.6488e-06	3.63649e-39	0	1.04859e-157	4.77926e-06	1.87822e-131	2.39844e-118	20.674	63.325	11.733	197.287	18.771	133.321	12.546	12.194	16.891	74.668	9.302	77.414	6	5+
345079	ANKRD56	72	215	105	253	59	239	86	261	96	199	67	168	-11.4033	1.51243	19.7823	8.67812e-06	0.000101406	3.48664e-19	3.53605e-23	1.02007e-37	1.07867e-24	5.67794e-07	1.08598e-10	0.979	3.177	1.271	3.942	0.838	4.518	1.427	4.982	1.659	3.184	1.65	4.249	6	5+
4288	MKI67	373	867	148	1866	132	628	526	1346	97	949	324	515	-9.95176	2.09639	34.8255	3.60619e-09	8.42916e-08	7.27068e-52	0	2.0199e-108	2.93577e-100	3.22136e-158	1.02603e-10	1.234	3.122	0.434	7.072	0.457	2.886	2.135	6.273	0.409	3.686	1.944	3.169	6	5+
3212	HOXB2	64	210	184	600	118	142	124	255	154	421	35	286	-11.0493	1.55417	20.4826	6.01773e-06	7.27605e-05	6.23515e-21	1.74764e-75	0.000556383	4.56901e-14	7.64455e-24	2.82009e-49	1.719	6.106	4.423	18.46	3.292	5.302	4.019	9.54	5.229	13.345	1.696	14.27	6	5+
113146	AHNAK2	1402	755	3023	7846	506	1760	2167	8032	643	5193	783	1837	-8.47736	1.5137	18.4832	1.71413e-05	0.000187198	8.6742e-36	0	6.79859e-241	0	0	2.75286e-97	2.8	1.643	5.344	17.95	1.061	4.882	5.331	22.65	1.637	12.159	2.839	6.825	6	5+
1832	DSP	2512	6755	2432	13041	1001	1737	2670	12953	2037	5194	977	1270	-8.03984	1.47811	19.0302	1.28664e-05	0.000143969	0	0	1.11674e-97	0	2.02568e-250	8.79221e-10	12.24	39.658	10.528	80.724	6.421	13.805	18.115	106.666	12.87	30.843	10.888	11.51	6	5+
79703	C11orf80	268	609	238	657	211	264	151	321	132	617	134	362	-10.6249	1.32745	15.8373	6.9027e-05	0.000652353	1.42616e-35	2.10605e-69	2.83448e-07	1.37732e-18	2.37436e-65	5.67193e-25	4.71	11.614	3.728	13.226	3.867	6.448	3.227	7.897	2.942	12.765	4.259	11.824	6	5+
55240	STEAP3	1723	2346	748	1418	711	2683	464	1387	563	3230	305	1926	-9.13973	1.72478	25.4278	4.59243e-07	7.00037e-06	4.86894e-31	8.29051e-88	0	6.82406e-126	0	8.37117e-288	17.64	26.115	6.805	16.632	7.614	38.167	5.809	19.955	7.327	38.866	5.658	36.67	6	5+
100423062	IGLL5	7174	7873	2066	13096	2966	12448	5692	39349	551	1532	944	5144	-7.4087	2.01036	32.5023	1.19054e-08	2.50647e-07	1.41706e-20	0	0	0	6.49359e-87	0	466.792	559.397	121.871	978.127	200.045	1129.6	443.01	3591.95	45.941	119.592	112.561	633.13	6	5+
3696	ITGB8	482	1028	545	1862	233	1617	335	635	341	640	339	525	-10.3979	1.36849	16.1139	5.96451e-05	0.000572975	1.17698e-52	8.03504e-241	0	2.96042e-28	1.04643e-15	6.01469e-10	2.039	4.737	2.043	9.025	1.034	9.503	1.742	3.79	1.839	3.177	2.604	4.133	6	4+
51114	ZDHHC9	2169	4960	1595	2588	1387	3573	1379	2161	1725	8094	1012	4001	-9.09845	1.39372	17.6242	2.69144e-05	0.000281061	4.27205e-283	6.84705e-117	0	2.03937e-57	0	0	19.004	47.274	13.637	25.978	12.721	43.495	14.799	26.643	20.229	83.317	16.076	65.205	6	4+
54733	SLC35F2	453	1475	847	1172	243	689	796	617	147	1167	421	1213	-10.42	1.35043	15.5261	8.13743e-05	0.000756107	5.57499e-139	1.47162e-35	1.0272e-78	0.00957089	4.9174e-176	7.92708e-89	5.605	19.834	9.321	16.613	3.142	11.846	12.028	10.721	2.311	16.98	9.435	27.91	6	4+
388743	CAPN8	954	4591	986	1344	1016	3983	1351	898	641	4224	636	4847	-9.44936	1.71149	23.3056	1.382e-06	1.91854e-05	0	1.09829e-38	0	2.71565e-12	0	0	15.954	83.335	14.692	25.746	17.723	92.562	27.49	21.036	13.599	83.148	19.24	150.674	6	4+
634	CEACAM1	270	1258	221	2031	274	1110	209	409	231	576	194	505	-10.7007	1.88029	29.7565	4.89866e-08	9.1317e-07	5.57293e-165	0	7.55708e-172	5.77261e-20	1.30408e-27	1.97047e-32	8.112	35.099	4.451	35.475	4.596	30.651	6.686	10.881	6.725	8.891	12.053	38.393	6	4+
100133941	CD24	4598	6985	602	18620	739	30103	706	2429	957	5570	1315	2512	-8.3676	2.59684	45.2013	1.77785e-11	6.33566e-10	1.34033e-142	0	0	5.5835e-257	0	2.05245e-85	86.222	142.091	10.067	399.939	14.442	784.477	16.081	63.728	22.748	123.005	44.581	87.546	6	4+
10103	TSPAN1	3338	6908	869	23165	792	2369	495	756	902	824	373	4856	-8.86597	1.88033	24.8697	6.13392e-07	9.09901e-06	0	0	9.82086e-283	3.66467e-19	0.000330035	0	88.034	197.218	20.504	699.661	21.694	86.84	15.758	27.774	30.069	25.638	17.746	237.868	6	4+
1281	COL3A1	40321	52752	46738	78409	14226	96084	72722	185338	9328	205079	9129	11618	-5.97548	1.64843	21.0767	4.41263e-06	5.48378e-05	0	0	0	0	0	4.2428e-70	278.373	396.391	286.324	620.208	102.896	921.647	615.939	1802.48	81.996	1662.72	114.336	149.221	6	4+
10653	SPINT2	2272	10660	3980	10430	3486	6408	2357	6682	3541	7942	1713	2843	-8.55472	1.35675	16.7896	4.17619e-05	0.000418217	0	0	0	0	6.31507e-294	2.54072e-64	142.021	680.184	235.845	836.735	201.247	598.067	146.824	507.788	255.162	480.206	130.86	220.092	6	4+
6659	SOX4	1413	4946	1579	5612	613	2222	1651	2370	689	3246	1301	1566	-9.24413	1.47019	18.9171	1.36521e-05	0.000151538	0	0	1.60435168924214e-314	1.11437e-46	0	9.7183e-07	10.971	41.786	10.882	49.921	4.984	23.97	15.715	25.908	6.809	29.603	18.32	22.618	6	4+
7039	TGFA	407	885	316	462	226	403	226	702	225	476	221	1140	-10.8091	1.29917	15.0544	0.000104455	0.000945046	4.04313e-47	4.063e-17	1.10407e-24	2.0689e-67	2.16945e-16	9.39674e-150	3.701	8.783	2.545	4.815	2.159	5.093	2.536	9.043	2.616	5.082	3.659	19.329	6	4+
54845	ESRP1	733	3264	1403	4121	598	1316	617	990	744	2749	1014	1552	-9.55421	1.38118	17.2585	3.26232e-05	0.000333245	0	0	8.83263e-110	9.80865e-29	4.43548e-228	1.86372e-26	9.248	41.167	21.224	66.848	9.038	34.833	10.109	16.106	19.48	57.567	21.254	33.438	6	4+
121227	LRIG3	655	3814	1555	1822	696	1680	725	1257	440	2084	539	2657	-9.38459	1.61022	22.5628	2.03383e-06	2.73303e-05	0	5.47117e-30	8.03833e-158	1.12896e-44	1.74443e-221	0	7.215	45.673	15.225	22.992	8.017	25.713	9.763	19.458	6.161	26.984	10.758	54.429	6	4+
1277	COL1A1	33639	28421	29569	45418	12190	67740	49301	130225	7001	333669	3258	12667	-5.64654	1.90757	26.8106	2.24403e-07	3.69719e-06	5.86784e-40	0	0	0	0	0	214.29	197.084	167.105	331.488	81.374	599.537	385.465	1168.95	56.796	2495.87	37.656	150.125	6	4+
27242	TNFRSF21	3456	3892	1590	7164	1149	3721	1641	4767	1249	1575	964	3549	-8.7235	1.35806	15.6109	7.78028e-05	0.00072665	4.03389e-14	0	0	0	0.000457433	0	36.731	44.975	15.019	87.229	12.773	54.951	21.33	71.217	16.878	19.676	18.567	70.151	6	4+
2305	FOXM1	155	537	107	681	100	200	257	346	57	468	113	165	-11.2444	1.61049	21.4166	3.69549e-06	4.69827e-05	1.30346e-54	6.48808e-134	4.35757e-15	4.405e-06	1.48174e-72	0.00434395	1.832	6.985	1.119	9.236	1.25	3.287	3.796	5.883	0.873	6.513	2.463	3.67	6	4+
7058	THBS2	2679	3644	1973	5199	1173	8406	2992	9634	507	26990	538	1022	-8.2325	2.08518	32.5297	1.17385e-08	2.4763e-07	2.43647e-47	0	0	0	0	6.58233e-35	17.376	25.728	11.354	38.635	7.972	75.751	23.816	88.046	4.188	205.565	6.331	12.333	6	4+
629	CFB	3758	6859	1595	7698	3128	3964	3742	7129	1014	5422	1429	9744	-8.38709	1.63812	22.9731	1.64281e-06	2.24642e-05	1.17441e-243	0	1.74438e-98	1.33764701564328e-312	0	0	57.045	113.06	21.559	133.856	49.561	83.615	69.203	151.716	19.537	96.844	39.257	274.978	6	4+
84817	TXNDC17	317	1609	308	308	304	886	256	409	164	692	194	735	-10.4806	1.47943	18.9749	1.32446e-05	0.000147561	4.48325e-224	0.00508968	1.1999e-103	2.41989e-12	1.32809e-66	1.87971e-74	13.495	74.696	11.601	15.025	13.6	52.396	13.448	24.625	8.912	34.539	15.012	58.244	6	4+
5255	PHKA1	283	1219	354	869	237	354	235	293	213	689	257	786	-10.5462	1.31238	15.4737	8.36614e-05	0.000774957	3.59644e-150	5.87691e-80	5.1042e-15	0.000847151	5.02988e-49	1.59704e-62	1.86	8.742	2.062	6.546	1.636	3.233	1.905	2.728	1.79	5.318	3.076	9.633	6	4+
114569	MAL2	2948	18202	4853	5869	2295	5234	2214	5210	3246	17437	4520	6778	-7.93521	1.42956	17.9846	2.22699e-05	0.000237402	0	1.47621e-107	0	0	0	2.48594e-103	41.513	278.414	60.822	94.673	33.749	102.416	38.018	102.921	58.042	288.843	115.227	177.457	6	4+
5874	RAB27B	81	175	105	468	25	275	74	118	76	137	115	369	-11.6001	1.65021	21.7955	3.03318e-06	3.92518e-05	4.84868e-10	6.31499e-75	7.89897e-69	0.000376918	0.000876789	8.07743e-32	2.672	6.239	3.108	17.681	0.854	12.613	2.931	5.403	3.162	5.341	6.832	22.6	6	4+
11226	GALNT6	596	904	348	1902	380	395	311	796	379	968	192	1364	-10.158	1.47021	18.1595	2.0315e-05	0.000218002	2.70658e-19	0	5.34605e-05	1.39718e-59	1.40474e-47	1.37678e-218	5.055	8.341	2.621	18.481	3.374	4.654	3.231	9.501	4.09	9.645	2.953	21.518	6	4+
26872	STEAP1	277	610	133	557	150	188	280	417	43	230	84	550	-11.044	1.56904	20.727	5.29628e-06	6.4746e-05	1.15719e-33	2.12703e-85	2.02599e-05	3.17037e-10	1.18087e-27	1.27652e-84	9.493	22.574	4.078	21.843	5.331	8.945	11.592	19.896	1.86	9.281	5.183	34.91	6	4+
2150	F2RL1	438	1595	381	2825	221	1036	165	285	226	451	237	528	-10.1514	1.688	24.002	9.62332e-07	1.37692e-05	1.47896e-168	0	2.81536e-177	6.48706e-11	2.23666e-13	6.33676e-26	6.045	23.912	4.679	44.662	3.186	19.868	2.778	5.519	3.961	7.321	5.922	13.549	6	4+
23682	RAB38	118	388	139	169	124	239	99	156	89	364	93	435	-11.3974	1.35231	15.9239	6.59425e-05	0.000626021	1.59776e-37	0.000412513	5.19962e-17	3.65731e-05	2.00894e-34	1.23958e-53	3.525	12.535	3.72	5.781	3.841	9.924	3.559	6.479	3.356	12.839	5.007	24.129	6	4+
59341	TRPV4	289	430	110	478	151	622	104	146	85	193	57	276	-11.4088	1.48818	18.4841	1.71329e-05	0.000187198	2.80139e-09	2.50242e-75	1.78419e-97	0.00137215	2.11087e-08	7.61952e-35	4.938	7.998	1.676	9.362	2.694	14.788	2.166	3.513	1.851	5.824	1.77	8.803	6	4+
1290	COL5A2	4649	5529	3920	6420	2632	7453	4238	12458	1712	26848	1445	1776	-8.11708	1.37871	15.701	7.41831e-05	0.000695446	1.55113e-31	6.6819e-294	0	0	0	5.99724e-09	25.153	32.572	18.808	39.797	14.929	56.023	28.165	95.031	11.8	170.526	14.189	17.878	6	4+
5099	PCDH7	192	616	333	563	80	223	243	509	115	958	51	125	-11.0992	1.5891	21.8859	2.89349e-06	3.76763e-05	9.52173e-58	1.16066e-28	1.36964e-25	9.30227e-28	2.68778e-148	6.31243e-08	3.187	11.535	3.685	8.396	1.767	3.737	5.06	7.65	1.526	15.549	4.043	3.947	6	4+
1803	DPP4	1763	1955	1202	4840	748	6111	1160	2426	961	11862	1415	2460	-8.39517	1.81935	25.9533	3.49782e-07	5.52855e-06	1.3668e-06	0	0	2.18752e-129	0	1.80721e-64	17.445	21.038	10.567	54.869	7.744	84.021	14.047	33.758	12.094	137.942	25.379	45.275	6	4+
55353	LAPTM4B	2171	18059	3510	38698	2500	5166	2188	3056	2556	20210	3185	4398	-7.34158	1.95537	30.1542	3.99027e-08	7.53878e-07	0	0	0	7.68763e-54	0	3.39884e-45	39.718	358.45	57.254	810.935	47.674	131.341	48.642	78.243	59.286	435.377	105.36	149.544	6	4+
5284	PIGR	10196	72154	18353	45790	8778	113723	8275	4177	13952	17521	6946	37291	-6.12398	1.67015	20.0776	7.43631e-06	8.76407e-05	0	0	0	1.65051e-216	2.23663e-32	0	91.31	702.892	145.968	469.804	82.283	1415.05	90.759	52.632	158.964	184.356	112.778	621.178	6	4+
1462	VCAN	2082	5048	2357	2153	1111	4553	1620	4461	1116	10431	897	1149	-8.39183	1.40742	16.6142	4.58072e-05	0.000455037	9.58336662910037e-318	1.78028e-06	0	0	0	3.40496e-08	20.553	54.045	20.759	24.345	11.425	62.465	19.41	61.58	13.96	121.297	16.005	21.079	6	4+
400506	C16orf88	161	559	203	700	119	349	309	389	188	590	118	178	-10.6507	1.32965	15.5609	7.98916e-05	0.000743977	2.74151e-57	3.6689e-92	8.95565e-42	5.13684e-05	1.58527e-40	0.000811036	3.41	12.834	3.838	16.979	2.624	10.272	7.933	11.51	5.042	14.723	4.515	7.005	6	4+
11113	CIT	747	17329	1102	6649	1012	9227	355	425	537	2060	516	360	-8.30533	2.07288	29.7195	4.99291e-08	9.28265e-07	0	0	0	0.000280141	3.42723e-178	1.10357e-06	3.291	83.234	4.303	33.567	4.68	56.483	1.925	2.645	3.019	10.656	4.133	2.955	6	4+
5091	PC	475	691	482	524	330	1133	248	409	187	1399	86	961	-10.067	1.60924	20.7428	5.25291e-06	6.42533e-05	5.05293e-13	7.35543e-07	7.73656e-154	2.31825e-13	5.62337e-205	8.54864e-188	10.193	18.111	6.277	14.794	6.184	40.893	15.646	30.215	7.998	51.069	1.543	17.691	6	4+
6423	SFRP2	1400	2324	1768	2545	804	7933	4010	9778	431	21047	466	294	-8.58113	1.68762	19.7272	8.93191e-06	0.000104098	2.41508e-64	6.63394e-85	0	0	0	3.12057e-09	29.118	52.406	32.821	60.628	17.411	229.306	101.138	284.205	11.355	515.769	17.513	11.363	6	3+
6558	SLC12A2	1344	4681	1519	9974	632	1683	1796	2223	1022	1923	2241	4121	-9.04633	1.36418	16.1982	5.70469e-05	0.000552313	0	0	5.07415e-178	3.26723e-22	3.4175e-45	3.20892e-126	7.314	27.739	7.331	62.193	3.606	12.725	12.006	17.057	7.086	12.286	22.135	41.729	6	3+
726	CAPN5	695	1265	652	2663	401	779	408	581	346	545	102	704	-10.058	1.32404	15.0581	0.000104253	0.000943624	1.75752e-45	0	5.02476e-54	9.99462e-12	2.71605e-07	2.24559e-111	6.076	12.031	5.062	26.672	3.67	9.462	4.369	7.148	3.849	5.598	1.617	11.448	6	3+
4061	LY6E	3161	29500	5129	27867	7385	4872	2907	4015	3973	15011	1072	1751	-7.73366	1.39185	15.7736	7.13936e-05	0.000673506	0	0	5.46577e-15	2.71602e-67	0	6.74149e-38	132.036	1326.67	268.168	1332.31	318.553	282.829	144.748	230.881	207.906	740.096	80.156	135.22	6	3+
6732	SRPK1	1231	3155	985	2748	718	1958	819	1537	705	1819	730	1338	-9.40225	1.27938	15.1046	0.000101714	0.00092303	7.14348e-217	8.40959e-291	6.64174e-212	8.24225e-66	2.83052e-90	3.35739e-41	16.651	32.902	11.22	35.071	6.603	27.799	12.105	33.367	18.696	18.659	23.211	21.816	6	3+
92304	SCGB3A1	814	991	755	1481	1809	40348	504	622	1599	1133	184	40837	-7.49176	1.69357	17.3538	3.10277e-05	0.000318314	1.24412e-07	1.80374e-97	0	8.07137e-07	6.35242e-29	0	120.33	153.419	105.251	250.088	263.558	8310.94	81.725	119.799	285.876	203.451	47.42	11100.9	6	3+
9787	DLGAP5	35	141	16	268	10	55	80	385	8	116	42	48	-12.362	2.48319	42.689	6.41719e-11	2.08509e-09	1.97321e-17	1.97197e-73	1.43937e-11	1.66454e-54	2.31679e-23	0.745713	0.483	2.269	0.196	4.994	0.145	2.464	1.361	7.542	0.142	2.833	1.059	2.821	5	6+
11130	ZWINT	97	187	43	270	53	123	85	189	26	224	77	105	-12.0118	1.60459	20.8129	5.064e-06	6.2147e-05	8.23592e-09	5.89237e-53	9.2032e-12	7.64887e-12	5.53742e-36	0.0741588	4.021	17.817	1.334	21.057	1.914	11.42	3.608	9.315	1.157	9.181	4.882	13.557	5	6+
29968	PSAT1	65	320	55	316	37	209	53	220	29	224	37	60	-11.9176	2.23344	39.4579	3.35207e-10	9.48247e-09	8.69715e-45	9.29228e-60	5.81927e-41	4.77618e-28	3.48069e-34	0.0403689	1.683	8.247	1.096	8.225	1.442	7.761	1.393	7.257	0.798	7.143	1.636	3.459	5	6+
43	ACHE	249	949	81	343	68	463	52	117	39	506	27	40	-11.3268	2.10367	34.4711	4.32625e-09	9.93522e-08	3.93785e-105	1.74766e-53	6.92062e-97	9.26819e-08	3.33432e-94	0.198823	5.332	23.217	1.563	12.233	1.93	13.787	1.735	3.6	1.829	14.825	1.038	2.322	5	6+
3017	HIST1H2BD	52	186	47	97	30	43	30	131	21	231	18	210	-12.2105	2.11254	33.8071	6.08578e-09	1.36475e-07	4.67891e-20	5.00415e-08	0.0257393	4.25898e-18	8.92597e-41	6.61798e-42	11.163	44.305	9.803	23.758	6.176	12.882	6.73	35.387	5.326	61.219	8.819	103.403	5	6+
2705	GJB1	5	494	67	1371	55	374	43	54	50	449	41	162	-11.3354	3.13283	64.4105	1.01019e-15	7.73863e-14	7.56457e-145	0	7.15654e-79	0.223454	1.74404e-72	1.25331e-17	0.141	39.482	3.725	112.019	4.915	31.32	1.731	6.615	2.985	38.717	2.09	11.842	5	6+
642475	C8orf73	102	488	83	484	73	349	79	417	52	1636	6	31	-11.2126	2.83862	59.8108	1.0443e-14	6.68287e-13	3.50945e-66	4.55248e-91	1.01941e-60	1.25679e-62	0	7.24547e-05	1.234	6.415	0.893	6.706	0.923	5.866	1.167	7.084	0.799	23.267	0.131	0.697	5	5+
6447	SCG5	13	110	26	65	18	66	25	48	12	146	20	41	-13.0752	1.99758	29.0154	7.18049e-08	1.28819e-06	3.35013e-21	5.21715e-07	1.6964e-10	0.00386232	7.14605e-27	0.0158333	0.974	7.183	1.271	2.841	0.72	3.499	2.424	2.601	0.623	6.558	1.393	3.109	5	5+
84740	AFAP1-AS1	12	2015	13	752	12	2811	29	516	13	4478	9	63	-10.1752	6.24965	193.113	6.65015e-44	3.55043e-40	0	5.099e-245	0	1.24084e-126	0	1.07986e-10	0.066	12.101	0.064	4.754	0.069	21.547	0.197	4.009	0.091	28.973	0.09	0.646	5	5+
57146	TMEM159	305	1645	667	2024	486	1251	509	512	436	1799	208	875	-10.1758	1.64473	23.4849	1.25898e-06	1.76174e-05	7.16786e-239	5.46042e-234	1.27525e-127	0.175601	1.83814e-168	1.86267e-97	6.663	38.951	13.011	50.643	11.049	37.982	13.472	15.621	12.06	46.317	8.208	35.517	5	5+
202374	STK32A	19	65	18	19	5	22	12	37	8	138	17	114	-13.2942	2.1083	29.1555	6.67943e-08	1.20551e-06	1.94572e-07	0.555529	0.000236347	0.00026727	5.49796e-29	2.87932e-18	1.793	6.689	1.623	2.361	0.523	3.271	1.046	3.943	0.746	12.369	2.271	15.836	5	5+
415	ARSE	63	1166	221	419	70	518	153	155	80	562	60	730	-11.1132	2.48359	44.4255	2.64217e-11	9.12156e-10	5.58791e-278	7.58069e-27	6.73035e-113	0.471815	6.81888e-80	2.14294e-147	1.166	23.404	3.646	8.88	1.35	13.319	3.439	4.013	1.876	12.244	2.007	25.102	5	5+
10563	CXCL13	234	242	3	162	3	147	101	1128	0	69	23	231	-11.7921	3.82943	80.5409	2.84754e-19	3.85611e-17	0.427656	6.49513e-53	2.82382e-48	4.42883e-241	2.88976e-20	1.35926e-43	8.912	9.945	0.103	7.064	0.118	7.784	4.599	59.451	0	3.109	1.575	16.325	5	5+
2086	ERV3-1	207	745	411	2230	250	651	485	516	349	1725	539	2947	-10.2407	1.81173	27.8495	1.31131e-07	2.24873e-06	1.91789e-78	0	1.7129e-67	0.0234181	2.98216e-190	0	2.861	11.228	5.026	35.314	3.631	12.498	8.271	10.086	6.157	27.951	13.54	75.813	5	5+
27344	PCSK1N	115	1036	153	800	93	69	64	186	103	627	14	188	-11.4058	2.23156	37.6359	8.52619e-10	2.25966e-08	1.77947e-197	1.03613e-141	1	2.34184e-17	4.37549e-81	2.59654e-39	5.78	55.993	6.95	46.023	4.804	4.822	3.807	12.847	6.486	37.389	1.261	17.514	5	5+
151009	LOC151009	213	1366	355	1153	333	789	346	355	236	908	229	1245	-10.6249	1.73158	25.5297	4.35622e-07	6.684e-06	6.78696e-220	4.1097e-143	5.79177e-73	0.187477	8.81889e-80	9.6218e-170	3.992	27.749	5.917	24.74	6.511	20.537	7.877	9.28	5.591	19.996	7.738	43.259	5	5+
8483	CILP	878	932	206	1106	96	982	542	1027	118	5140	49	134	-10.2268	2.27345	35.9708	2.00295e-09	4.90571e-08	0.0185929	2.8824e-198	1.29012e-239	2.32639e-45	0	7.41374e-10	7.51	8.673	1.565	10.838	0.86	11.67	5.68	12.363	1.284	51.65	0.76	2.132	5	5+
3026	HABP2	73	501	5	1440	4	1867	8	75	12	3357	13	555	-10.5755	6.10504	173.832	1.07708e-39	1.884e-36	1.66781e-84	0	0	1.68688e-15	0	1.47978e-144	1.026	7.64	0.062	23.176	0.22	36.441	0.258	1.777	0.214	55.291	0.33	14.451	5	5+
5570	PKIB	65	73	41	136	18	54	27	101	23	118	22	182	-12.7944	1.84289	25.8064	3.77432e-07	5.90776e-06	0.421428	7.6034e-18	4.41663e-07	3.8738e-12	3.15006e-14	7.99833e-32	1.957	2.376	1.105	4.689	0.562	2.26	0.979	4.224	0.873	4.191	1.192	10.164	5	5+
8857	FCGBP	1199	2586	569	4660	322	3659	174	116	575	9683	140	2766	-9.36836	2.75581	49.9073	1.61182e-12	7.04834e-11	5.69677e-133	0	0	0.0292965	0	0	3.269	7.68	1.367	14.549	0.924	13.846	0.587	0.447	1.997	30.827	0.692	13.987	5	5+
26499	PLEK2	110	260	81	829	78	133	92	124	89	252	34	191	-11.8658	1.6385	21.6445	3.28155e-06	4.23094e-05	1.22296e-16	1.27791e-197	4.4203e-08	0.0101315	1.59572e-15	4.95828e-27	3.286	8.4	2.168	28.359	2.416	5.523	3.308	5.15	3.356	8.889	1.83	10.595	5	5+
27324	TOX3	43	393	115	1896	22	464	21	19	25	603	48	800	-11.1942	3.58128	82.363	1.13256e-19	1.60624e-17	2.12454e-75	0	7.82359e-137	1	4.21545e-133	5.18324e-177	1.328	6.092	1.461	30.996	0.465	9.202	0.683	0.38	0.453	10.649	1.408	21.227	5	5+
4600	MX2	1577	8199	672	4116	1369	2795	918	763	655	2314	463	1365	-9.45982	1.57924	21.1581	4.22919e-06	5.28712e-05	0	0	1.0985e-207	0.152311	4.57909e-182	2.43797e-103	21.133	119.366	8.012	63.184	19.164	52.045	15.01	14.349	11.148	36.471	11.234	34.011	5	5+
55165	CEP55	70	160	33	238	17	97	91	181	23	203	87	81	-12.4393	1.78024	23.9611	9.83022e-07	1.40079e-05	2.63882e-10	1.05226e-50	6.83465e-19	1.00893e-09	1.08064e-32	0.945161	1.164	2.891	0.488	4.535	0.295	2.243	1.844	4.218	0.634	3.971	2.618	2.504	5	5+
54933	RHBDL2	45	411	20	644	21	107	23	33	29	170	20	76	-12.2175	2.62626	47.7324	4.88546e-12	1.93483e-10	7.59115e-79	9.16596e-198	5.77225e-20	0.197534	6.47742e-22	1.83124e-08	1.036	10.251	0.411	16.978	0.503	3.423	0.641	1.06	0.845	4.613	0.831	3.25	5	5+
79896	THNSL1	81	474	137	278	76	289	103	106	71	335	124	261	-11.8389	1.52294	19.5092	1.00117e-05	0.000115401	3.1831e-73	3.41261e-20	4.0504e-43	0.555176	3.91317e-36	4.13321e-12	0.83	5.283	1.248	3.265	0.815	4.116	1.292	1.528	0.925	4.036	2.304	4.976	5	5+
343578	ARHGAP40	14	676	37	788	55	495	5	10	8	273	7	392	-11.5324	4.42743	113.059	2.09474e-26	7.85153e-24	8.36535e-187	1.95853e-225	9.78245e-116	0.343159	1.82974e-64	5.51736e-105	0.197	10.312	0.462	12.677	0.807	9.659	0.086	0.197	0.143	4.51	0.178	10.235	5	5+
7498	XDH	28	192	25	1056	13	696	60	878	15	685	15	993	-11.0095	4.9345	148.644	3.43029e-34	3.27281e-31	4.92847e-33	0	6.18056e-229	6.05101e-204	1.56468e-166	6.2196e-272	0.185	1.383	0.147	8.005	0.09	6.398	0.487	8.184	0.126	5.322	0.18	12.222	5	5+
7020	TFAP2A	12	295	13	748	10	98	15	159	10	143	6	153	-12.0396	4.32142	114.914	8.21949e-27	3.25523e-24	4.28817e-75	8.1239e-244	1.17714e-23	1.03268e-33	1.37081e-27	3.04811e-37	0.158	4.226	0.152	11.298	0.138	1.795	0.413	2.942	0.167	2.217	0.143	3.751	5	5+
147920	IGFL2	12	5	1	11	0	10	0	16	2	104	0	10	-14.3137	3.32839	36.0787	1.89507e-09	4.66872e-08	0.207033	0.00604204	0.0020251	4.91834e-05	9.13667e-26	0.00243069	1.482	0.689	0.115	2.373	0.443	3.316	0	2.608	0.301	15.558	0	2.276	5	5+
140686	WFDC3	10	51	3	61	9	22	15	180	7	966	2	95	-12.1963	3.98958	84.9242	3.10028e-20	4.92316e-18	2.53531e-08	5.22251e-17	0.00422251	1.3034e-39	1.87157e-255	2.37957e-25	0.496	2.719	0.134	3.461	0.459	1.516	0.881	12.266	0.435	56.803	0.178	8.729	5	5+
24141	C20orf103	107	245	68	171	96	315	200	385	50	737	47	76	-11.6326	1.63992	22.0255	2.69058e-06	3.52765e-05	4.69187e-15	3.40963e-17	8.85443e-42	4.96014e-18	7.59919e-143	0.0194474	4.69	11.683	2.224	8.106	2.387	14.88	7.954	24.301	3.005	42.364	2.66	3.384	5	5+
10643	IGF2BP3	52	1053	33	386	15	184	48	394	22	395	26	21	-11.581	3.27744	70.1146	5.5958e-17	5.59313e-15	2.94165e-256	1.49057e-95	5.24564e-48	1.17392e-75	2.96456e-81	0.783404	0.481	10.591	0.271	4.089	0.145	2.364	0.543	5.126	0.259	4.292	0.436	0.361	5	5+
284340	CXCL17	2353	15064	4167	10436	2404	10055	2309	2183	2602	7681	1833	3795	-8.37507	1.47928	18.9032	1.37524e-05	0.000152571	0	0	0	0.245319	0	1.186e-155	142.045	975.206	228.329	720.972	148.489	844.259	163.646	180.087	196.069	551.495	197.69	424.303	5	5+
401145	FAM190A	43	151	48	185	24	82	29	68	23	172	37	91	-12.5958	1.8657	28.0041	1.21061e-07	2.09141e-06	2.72178e-16	2.59519e-27	4.03363e-12	3.31718e-05	2.85166e-26	4.66011e-06	0.87	3.312	0.866	4.286	0.506	2.305	0.712	1.923	0.589	4.098	1.352	3.42	5	5+
51237	MZB1	464	415	92	668	153	504	169	1135	30	67	68	305	-11.1003	1.83928	25.8788	3.63547e-07	5.72028e-06	0.603586	1.48915e-139	6.90598e-67	3.53454e-196	0.00204542	3.63855e-36	29.236	28.021	5.268	48.165	9.852	44.171	12.475	97.583	2.357	5.024	7.649	35.584	5	5+
3217	HOXB7	22	211	84	356	27	127	28	73	22	101	29	9	-12.4187	1.79746	22.823	1.7763e-06	2.4148e-05	3.08012e-42	1.15328e-55	2.55602e-22	1.82051e-06	2.63684e-11	0.00401182	0.718	7.441	2.459	13.303	0.913	5.761	1.097	3.307	0.905	3.894	1.704	0.545	5	5+
200810	ALG1L	8	152	12	110	9	82	2	6	7	83	1	77	-13.1036	3.71388	74.9649	4.79161e-18	5.49596e-16	4.77859e-37	1.94949e-26	6.29821e-20	0.29846	9.40161e-16	1.83488e-21	2.272	21.682	0.798	19.258	0.944	17.914	0.56	0.663	2.401	7.376	0.261	19.755	5	5+
80201	HKDC1	69	488	204	985	152	1092	110	89	109	344	76	939	-10.9656	2.25131	38.0317	6.96063e-10	1.86833e-08	7.95243e-84	1.60061e-165	3.29205e-233	0.690467	1.64249e-24	5.0976e-190	0.721	5.546	1.895	11.795	1.662	15.86	1.406	1.308	1.449	4.226	1.44	18.254	5	5+
394263	MUC21	101	1272	34	694	112	6305	8	100	143	3735	78	742	-9.91438	4.27644	122.904	1.46371e-28	7.87775e-26	1.76196e-272	4.28226e-197	0	2.13037e-22	0	1.10589e-136	1.075	14.725	0.322	8.465	1.247	93.276	0.104	1.497	1.936	46.742	1.505	14.693	5	5+
7262	PHLDA2	238	189	39	86	49	110	39	224	110	329	17	81	-11.858	1.41956	15.9268	6.58385e-05	0.000625317	0.122584	9.10135e-08	3.37577e-10	4.7117e-36	9.80893e-22	9.92232e-11	12.917	11.019	1.916	5.342	2.728	8.302	2.497	16.67	7.469	21.206	1.651	8.146	5	5+
85477	SCIN	175	845	230	956	172	571	224	222	294	894	174	850	-10.5467	1.71811	25.0345	5.63141e-07	8.47335e-06	3.33392e-114	5.11481e-145	1.85028e-75	0.553348	3.40615e-58	3.82653e-107	2.786	14.603	3.599	17.431	2.857	12.63	4.713	4.952	7.536	16.747	5.011	25.152	5	5+
79152	FA2H	97	197	150	306	47	124	50	82	62	196	24	214	-11.8331	1.50362	18.8289	1.42984e-05	0.000158209	3.79675e-10	2.43371e-22	3.86964e-14	0.00240201	2.26034e-14	1.56044e-38	1.605	3.538	2.211	5.8	0.811	2.851	1.007	1.901	1.301	3.817	0.718	6.582	5	5+
1033	CDKN3	20	41	7	72	10	32	27	54	8	63	21	27	-13.2331	1.70457	19.9583	7.91503e-06	9.29695e-05	0.00554172	1.13592e-17	6.07145e-05	0.00144469	3.85905e-10	0.577027	1.601	3.566	0.789	9.054	0.829	3.571	2.564	9.605	0.811	6.018	3.045	4.052	5	5+
9768	KIAA0101	10	67	11	45	8	23	8	40	8	49	30	48	-13.3292	1.99434	26.7272	2.34295e-07	3.84508e-06	3.85034e-12	1.24968e-07	0.000706271	1.35205e-06	3.91712e-07	0.0811008	2.335	8.207	0.686	6.546	0.748	4.023	2.421	6.253	1.292	6.758	3.305	6.25	5	5+
59272	ACE2	65	654	98	187	49	145	69	43	63	187	58	196	-11.6752	1.47693	17.2159	3.33639e-05	0.000339956	5.81537e-130	1.10677e-12	9.2945e-18	0.0912275	9.13847e-13	4.30835e-18	0.721	7.889	0.967	2.377	0.569	2.236	0.936	0.671	0.889	2.439	1.166	4.045	5	5+
55472	C8orf39	6	50	7	35	10	25	7	24	15	64	5	13	-13.614	2.04228	25.8182	3.75134e-07	5.88056e-06	1.44015e-09	3.26699e-07	0.0015835	0.00144503	3.89996e-07	0.11728	0.496	4.406	0.53	3.31	0.838	2.876	0.667	2.678	1.535	6.327	0.734	1.987	5	5+
79962	DNAJC22	19	99	16	291	21	82	13	13	18	80	2	86	-12.5718	2.61622	43.6421	3.94271e-11	1.3199e-09	6.05106e-15	1.31535e-80	1.44264e-13	1	3.31694e-09	9.32383e-23	0.433	2.444	0.326	7.594	0.498	2.597	0.359	0.413	0.519	2.149	0.082	3.641	5	5+
1063	CENPF	256	953	98	1008	71	430	277	518	69	723	204	233	-10.6938	2.10607	34.1198	5.18215e-09	1.1772e-07	6.13752e-103	1.02242e-239	1.98832e-85	8.84788e-23	3.67728e-124	0.232901	0.918	3.723	0.311	4.142	0.267	2.142	1.222	2.622	0.315	3.043	1.328	1.555	5	5+
645784	ANKRD36BP2	62	123	26	217	17	99	67	269	5	16	33	144	-12.328	2.14501	33.3939	7.52588e-09	1.64894e-07	3.21481e-06	2.60344e-48	2.17054e-19	3.14244e-33	0.0444914	3.61349e-17	1.509	3.243	0.566	6.049	0.43	3.349	1.972	9.132	0.154	0.459	1.45	6.511	5	5+
23491	CES3	40	265	74	499	616	962	35	88	43	626	20	166	-11.1694	2.43372	45.4317	1.58052e-11	5.71984e-10	1.29904e-44	2.10092e-101	1.02455e-43	4.86067e-07	6.98505e-121	3.85753e-29	0.587	4.242	0.962	8.389	9.486	19.609	0.633	1.829	0.807	10.788	0.534	4.542	5	5+
1311	COMP	261	1735	31	484	98	1736	41	408	6	9560	23	50	-9.73363	3.90069	93.5916	3.87832e-22	8.30673e-20	2.84571e-285	4.71371e-130	0	1.3227e-83	0	0.00368592	4.277	30.866	0.453	9.086	1.675	39.535	0.818	9.368	0.125	184.404	0.682	1.523	5	5+
3783	KCNN4	482	463	99	1439	212	1400	183	1786	94	704	54	414	-10.4112	2.74617	54.2022	1.80887e-13	9.12698e-12	0.933273	0	6.85107e-288	0	2.40856e-103	7.7564e-69	8.827	9.199	1.617	30.186	4.047	35.63	4.072	45.773	2.183	15.182	1.788	14.091	5	5+
29128	UHRF1	138	361	39	260	53	118	125	510	38	238	66	147	-11.6645	1.88337	29.4493	5.74e-08	1.05041e-06	1.06335e-26	3.20061e-53	7.01256e-11	2.40161e-63	8.27029e-32	7.95742e-08	1.841	4.047	0.608	3.071	0.834	1.69	1.973	7.392	0.877	2.884	1.233	2.818	5	5+
54443	ANLN	94	608	57	579	32	209	227	481	43	587	132	154	-11.2391	2.36428	41.5988	1.12061e-10	3.51069e-09	4.06525e-99	1.48437e-137	1.65384e-43	7.49357e-27	7.08824e-112	0.259648	0.75	5.28	0.404	5.294	0.267	2.318	2.221	5.404	0.437	5.503	1.911	2.286	5	5+
128239	IQGAP3	129	465	103	822	60	344	227	514	73	534	61	126	-11.1625	2.11846	36.5851	1.46143e-09	3.68696e-08	2.401e-49	4.24214e-178	4.51951e-67	2.21716e-32	5.52661e-78	5.58308e-06	0.802	3.146	0.568	5.852	0.391	2.97	1.732	4.501	0.578	3.896	0.688	1.457	5	5+
376693	RPS10P7	30	90	44	107	11	33	39	34	31	126	9	46	-12.813	1.4561	16.0746	6.08951e-05	0.000583914	1.93326e-08	1.2557e-10	9.53586e-05	1	1.11261e-12	9.06268e-07	2.54	8.115	3.415	10.36	0.943	3.887	3.803	3.879	3.246	12.756	1.351	7.195	5	5+
84679	SLC9A7	261	251	85	301	52	168	92	179	75	464	66	253	-11.4926	1.55522	19.9169	8.08809e-06	9.4843e-05	1	2.0816e-41	2.50887e-22	3.02485e-09	4.29201e-61	2.95798e-26	4.879	5.09	1.417	6.445	1.013	4.364	2.089	4.682	1.777	10.215	2.231	8.79	5	5+
9075	CLDN2	63	213	84	784	23	389	33	349	54	1312	20	24	-11.0938	3.03913	61.7322	3.93499e-15	2.6992e-13	7.22391e-22	1.36062e-180	1.02803e-108	3.65834e-74	1.22246e-287	0.772792	0.89	3.268	1.056	12.686	0.339	7.636	0.568	6.916	0.969	21.802	0.511	0.63	5	5+
8908	GYG2	72	401	35	201	50	129	55	75	12	404	13	429	-11.6731	2.77342	52.8686	3.56623e-13	1.71416e-11	5.33758e-60	4.31111e-38	4.87565e-14	0.047378	1.25181e-94	7.15592e-108	1.089	6.608	0.472	3.485	0.791	2.714	1.016	1.598	0.308	7.21	0.358	12.118	5	5+
26	ABP1	51	493	13	3020	17	142	25	58	15	552	7	73	-10.8057	3.89661	89.9915	2.39184e-21	4.56407e-19	5.86995e-97	0	1.39454e-32	0.000125243	2.38856e-129	1.72594e-14	0.849	8.904	0.193	57.557	0.295	3.283	0.506	1.352	0.317	10.811	0.211	2.258	5	5+
171177	RHOV	117	273	9	188	24	50	12	110	25	384	14	464	-11.7894	3.14171	64.0576	1.20836e-15	9.02612e-14	2.37706e-17	1.21889e-54	0.000102337	7.02336e-23	1.01449e-75	1.03999e-116	2.901	7.33	0.199	5.338	0.618	1.723	0.36	3.803	0.784	11.228	0.626	21.37	5	5+
5794	PTPRH	8	109	22	477	40	205	22	338	11	212	4	135	-11.8429	3.96262	102.842	3.62893e-24	1.07783e-21	7.09497e-25	1.5774e-136	8.8723e-38	5.69497e-80	1.01243e-44	2.16035e-34	0.233	1.905	0.324	11.114	0.6	5.108	0.778	8.064	0.485	4.434	0.258	5.599	5	5+
55143	CDCA8	39	219	43	377	32	86	75	205	26	156	26	54	-12.011	2.07196	33.7314	6.32722e-09	1.41135e-07	3.91583e-33	7.10936e-85	4.13429e-10	2.54442e-17	5.89847e-21	0.004083	0.687	4.184	0.675	7.603	0.587	2.104	1.605	5.053	0.581	3.234	0.828	1.767	5	5+
8581	LY6D	6	131	2	1694	4	20	3	93	0	372	0	87	-11.3978	6.34748	153.968	2.35341e-35	2.4699e-32	2.91331e-33	0	0.000201773	1.28595e-25	1.87732e-103	5.09751e-26	0.406	9.481	0.123	131.073	0.276	1.881	0.237	8.559	0	29.971	0	10.889	5	5+
83879	CDCA7	136	250	27	1159	39	123	76	462	32	1207	74	59	-10.9852	2.56433	40.785	1.69929e-10	5.09545e-09	3.98262e-10	0	1.78262e-16	2.4716e-76	7.82713e-285	0.357711	2.235	4.476	0.395	21.832	0.67	2.811	1.525	10.691	1.017	23.39	2.211	1.81	5	5+
29089	UBE2T	57	216	29	169	25	70	30	98	13	171	34	55	-12.3118	2.03532	31.7529	1.75088e-08	3.53036e-07	9.21387e-25	1.27461e-32	5.54581e-09	2.1398e-10	1.2787e-32	0.0527138	3.103	12.63	1.429	10.53	1.396	5.299	1.926	7.315	0.885	11.056	3.312	5.548	5	5+
4907	NT5E	338	3546	968	3137	385	296	484	827	190	2047	357	1777	-9.61435	1.93686	29.5602	5.42073e-08	1.00159e-06	0	0	1	1.25016e-28	0	5.82021e-227	7.047	66.242	15.958	65.615	6.366	6.523	10.359	22.08	6.292	31.746	6.631	39.652	5	5+
1101	CHAD	29	193	47	81	54	86	50	46	52	175	11	95	-12.3627	1.48888	17.224	3.32216e-05	0.000338834	1.15763e-32	2.07417e-05	5.76569e-05	1	7.94501e-14	2.60082e-17	0.726	5.232	1.052	2.322	1.405	2.992	1.513	1.605	1.646	5.167	0.497	4.418	5	5+
112479	ERI2	33	137	48	128	24	88	48	39	26	183	31	74	-12.4302	1.5777	19.4271	1.04512e-05	0.000119678	1.91766e-17	6.38291e-14	1.95221e-13	0.904637	2.11023e-26	6.84688e-05	2.36	10.475	3.255	10.473	1.748	8.755	3.994	3.788	2.312	15.608	4.628	9.792	5	5+
196410	METTL7B	13	356	30	175	23	126	60	50	13	126	18	77	-12.2134	2.52901	43.3637	4.54545e-11	1.50487e-09	1.16383e-91	1.02795e-33	1.62674e-24	1	2.23133e-21	1.87357e-09	0.372	11.029	0.769	5.739	0.683	5.016	2.07	1.992	0.47	4.259	0.929	4.095	5	5+
92840	REEP6	68	173	78	220	88	73	46	114	62	303	12	70	-12.0105	1.47462	17.7578	2.50883e-05	0.000263697	7.08038e-13	1.53718e-24	0.895111	8.43327e-09	4.74613e-34	1.08608e-10	2.187	6.015	2.25	8.104	2.933	3.264	1.778	5.092	2.516	11.515	0.695	4.18	5	5+
9244	CRLF1	150	745	52	199	89	2601	26	45	40	229	11	311	-10.7746	2.85283	56.1405	6.74731e-14	3.7088e-12	2.10976e-102	1.98562e-29	0	0.0146898	8.07047e-29	1.80895e-76	3.484	18.748	1.079	5.294	2.15	83.963	0.731	1.459	1.176	6.27	0.461	13.42	5	5+
171169	SPACA4	19	65	22	27	26	61	16	38	5	43	7	25	-13.3167	1.56898	17.323	3.15345e-05	0.000323198	1.94572e-07	0.175389	1.05571e-06	0.00265207	2.62602e-07	0.00323177	0.971	3.572	1.017	1.58	1.365	4.336	0.967	2.668	0.32	2.608	0.641	2.369	5	5+
202915	TMEM184A	116	548	150	349	118	346	85	318	112	290	23	152	-11.32	1.86098	29.4831	5.64067e-08	1.03494e-06	8.75282e-73	1.46175e-30	5.8596e-41	2.28819e-37	2.36032e-15	6.92165e-24	0.762	3.925	0.872	2.626	0.814	3.157	0.689	2.954	0.939	2.233	0.275	1.858	5	5+
1380	CR2	273	484	9	205	5	1403	104	1389	5	113	8	289	-11.0319	4.38717	104.29	1.7481e-24	5.5595e-22	3.97757e-17	3.50572e-60	0	3.36727643029349e-315	3.67472e-25	9.68333e-74	3.586	8.765	0.08	4.214	0.26	25.224	1.277	25.292	0.064	1.506	0.146	7.532	5	5+
54866	PPP1R14D	3	43	0	169	2	20	14	184	0	20	1	10	-13.2511	4.63555	84.0768	4.75918e-20	7.23878e-18	6.34081e-10	5.20705e-55	7.66043e-06	1.39724e-41	4.58226e-06	0.0141893	0.3	5.415	0	19.424	0.206	2.796	1.651	28.376	0	2.43	0.184	1.911	5	5+
25825	BACE2	608	1373	997	2385	483	2006	664	531	309	2156	345	934	-9.93879	1.45489	18.0263	2.17873e-05	0.000232731	2.09315e-77	2.96975e-210	1.70927398458713e-315	0.069266	2.27509e-302	4.99395e-63	15.804	37.142	23.78	109.286	12.592	65.551	31.978	29.027	16.389	108.811	14.563	42.714	5	5+
9245	GCNT3	47	2089	14	6037	19	2278	10	26	5	390	23	991	-10.0086	5.91225	172.315	2.30981e-39	3.72945e-36	0	0	0	0.00632069	3.75869e-99	7.93554e-260	0.861	41.506	0.229	126.637	0.363	57.975	0.223	0.666	0.116	8.41	0.762	33.731	5	5+
79838	TMC5	1127	3898	951	4384	541	4024	487	362	540	2591	719	4271	-9.31387	1.97172	31.1554	2.38177e-08	4.68981e-07	0	0	0	0.0125126	1.66841e-278	0	16.055	60.336	12.07	71.549	8.045	79.672	8.456	7.24	9.777	43.464	18.56	113.231	5	5+
3598	IL13RA2	35	281	15	131	6	81	26	87	12	79	16	24	-12.7195	2.52336	43.8393	3.56479e-11	1.20104e-09	4.1198e-52	8.34631e-30	1.36945e-22	1.04541e-09	1.02364e-11	0.338949	1.143	9.919	0.44	4.9	0.203	3.678	1.02	3.945	0.494	3.049	0.941	1.455	5	5+
79983	POF1B	147	468	123	1186	28	526	54	56	75	658	73	1012	-11.0046	2.7849	54.2301	1.78338e-13	9.02001e-12	6.06487e-44	1.42127e-276	3.91833e-151	0.653784	2.01584e-104	3.30854e-212	1.44	4.987	1.071	13.313	0.287	7.161	0.648	0.772	0.935	7.577	1.297	18.443	5	5+
10381	TUBB3	353	304	67	405	88	520	253	2721	45	1748	24	217	-10.5787	2.93713	58.1727	2.40093e-14	1.42234e-12	0.378452	3.91474e-78	1.33687e-101	0	0	2.70502e-39	9.501	8.844	1.608	12.477	2.462	19.439	8.22	101.653	1.525	55.324	1.161	10.809	5	5+
10406	WFDC2	1877	10078	1168	8106	776	6630	712	689	776	4966	371	4572	-8.78079	2.52954	48.9779	2.58865e-12	1.08889e-10	0	0	0	0.354726	0	0	227.923	1290.66	132.196	1124.98	93.909	1121.15	96.75	110.556	115.036	727.82	79.113	1023.02	5	5+
51203	NUSAP1	121	293	74	362	41	106	139	228	28	319	97	139	-11.3372	1.62528	21.4942	3.54907e-06	4.53409e-05	1.69529e-19	4.24709e-62	1.61891e-11	8.70514e-08	7.28807e-57	0.0139962	2.298	6.109	1.245	7.888	0.821	2.8	3.277	7.173	0.686	7.136	3.384	4.957	5	5+
22974	TPX2	133	476	69	805	49	237	253	605	52	524	134	163	-10.7507	2.12616	35.0495	3.2143e-09	7.59777e-08	5.13545e-50	7.87403e-200	2.75115e-42	3.0588e-41	1.90737e-89	0.131519	1.404	5.464	0.647	9.736	0.541	3.476	3.267	8.978	0.698	6.502	2.564	3.2	5	5+
222663	SCUBE3	96	596	102	347	90	816	119	1612	38	551	67	47	-10.5036	2.60424	47.6437	5.11173e-12	2.00552e-10	5.01182e-95	1.81229e-45	1.63991e-191	0	1.30991e-106	0.135517	0.714	4.825	0.673	2.957	0.701	8.433	1.085	16.886	0.36	4.814	0.904	0.65	5	5+
51659	GINS2	48	114	20	74	20	28	42	78	11	103	21	82	-12.4482	1.63164	20.4014	6.27837e-06	7.55203e-05	4.20238e-08	2.03432e-11	0.0753924	0.000338521	7.66722e-18	2.787e-09	1.874	4.8	0.702	3.307	0.806	1.52	1.958	4.211	0.54	4.758	1.473	5.939	5	5+
2628	GATM	191	1308	304	709	188	427	274	232	184	703	197	491	-10.3533	1.41605	17.236	3.30119e-05	0.000336859	3.27116e-219	3.95364e-61	1.0294e-37	0.687934	5.18936e-61	1.76963e-29	2.954	21.966	4.187	12.561	3.035	9.177	5.162	5.03	3.612	12.795	5.514	14.118	5	5+
90649	ZNF486	73	404	159	613	39	273	83	192	52	201	81	68	-11.1979	1.75625	24.4436	7.65176e-07	1.11109e-05	3.70175e-60	2.31369e-88	5.73719e-58	8.6878e-13	2.13492e-18	0.494567	2.106	12.609	4.108	20.254	1.168	10.948	2.885	7.704	1.894	6.844	4.212	3.642	5	5+
10615	SPAG5	308	787	129	782	178	324	255	533	93	479	148	153	-10.5758	1.42173	17.1909	3.3806e-05	0.000343959	7.69778e-55	2.26616e-150	1.42058e-20	4.10187e-29	3.35273e-55	0.930708	3.124	8.681	1.163	9.087	1.889	4.566	3.165	7.602	1.2	5.71	2.721	2.886	5	5+
79949	C10orf81	137	280	9	766	12	46	18	18	43	296	14	197	-11.3959	2.56077	41.1468	1.41212e-10	4.28951e-09	5.87143e-14	7.93203e-250	5.29335e-08	1	4.27374e-42	9.88514e-42	9.93	21.647	0.592	63.499	0.887	4.636	1.518	1.761	3.85	25.436	1.795	26.253	5	5+
1308	COL17A1	193	1545	61	1270	32	1017	46	68	45	581	66	468	-10.3172	3.31294	74.9782	4.7593e-18	5.48888e-16	3.66077e-279	0	0	0.0198216	9.89335e-109	1.66847e-75	1.302	11.349	0.365	9.82	0.226	9.536	0.381	0.647	0.387	4.604	0.808	5.876	5	5+
440335	LOC440335	129	690	77	454	70	596	40	37	42	277	57	239	-11.0059	2.22764	38.1997	6.3861e-10	1.72293e-08	1.20037e-99	4.17206e-86	3.55048e-136	1	1.89776e-38	5.77874e-27	39.272	237.11	22.734	189.006	32.503	269.531	22.933	44.747	39.025	179.302	31.698	136.281	5	5+
79977	GRHL2	585	2803	1156	3188	526	1209	534	552	520	2294	461	960	-9.30834	1.4123	17.7054	2.57887e-05	0.000270653	0	0	4.63969e-107	0.0592173	1.11464e-228	2.1026e-40	4.25	22.161	7.453	26.534	4.003	12.203	4.758	5.648	4.809	19.572	6.075	12.974	5	5+
100130557	LOC100130557	50	389	44	156	70	96	74	118	54	165	46	168	-12.1899	1.60141	21.1495	4.24812e-06	5.30763e-05	2.14499e-70	1.13688e-21	0.000579846	0.000376918	1.48639e-11	6.11143e-17	0.626	5.307	0.487	2.238	0.921	1.67	1.143	2.085	0.861	2.419	1.045	3.908	5	4+
4796	TONSL	100	523	222	599	154	178	143	420	107	647	28	46	-11.3948	1.54521	20.1156	7.28981e-06	8.61252e-05	3.82342e-75	1.10875e-61	0.000519928	6.27345e-38	2.20532e-83	0.0719358	0.848	4.827	1.672	5.821	1.368	2.098	1.486	5.014	1.155	6.448	0.431	0.726	5	4+
29028	ATAD2	534	2170	407	2891	382	533	472	1020	341	1469	497	424	-10.1371	1.43239	17.1856	3.38994e-05	0.000344743	2.15402e-253	0	7.30858e-19	3.74664e-58	2.29873e-143	0.0502762	3.624	16.03	2.451	22.48	2.716	5.026	3.93	9.752	2.947	11.708	6.119	5.354	5	4+
2191	FAP	451	729	314	692	179	892	411	1592	175	4336	400	416	-10.188	1.79422	24.7916	6.38766e-07	9.44869e-06	1.55347e-19	2.38173e-55	2.90675e-158	1.68082e-188	0	0.695592	6.459	11.341	4.003	11.353	2.677	17.753	7.177	31.983	3.182	73.058	10.371	11.077	5	4+
4064	CD180	213	176	95	368	69	245	147	800	133	270	74	296	-11.5837	1.56766	19.739	8.87734e-06	0.00010352	0.313308	1.54781e-53	7.69734e-35	9.18565e-123	1.06956e-08	8.30894e-32	3.129	2.808	1.242	6.193	1.058	5.001	2.632	16.481	2.48	4.667	1.968	8.084	5	4+
1298	COL9A2	382	3077	250	1112	295	919	211	230	177	909	106	169	-10.5847	1.72278	24.5105	7.39077e-07	1.07956e-05	0	2.83619e-177	3.87261e-114	0.0986442	6.4647e-104	0.000386264	5.379	47.065	3.133	17.938	4.338	17.982	3.623	4.544	3.165	15.058	2.702	4.425	5	4+
1238	CCBP2	152	899	158	683	78	55	119	166	42	142	43	643	-11.4867	1.76455	23.6043	1.18325e-06	1.66575e-05	1.38987e-138	2.78638e-107	0.862719	0.000677663	1.69411e-11	1.4317e-138	2.024	13.006	1.872	10.419	1.085	1.018	1.934	3.102	0.71	2.224	1.037	15.921	5	4+
6382	SDC1	2427	15336	9217	7502	4815	6075	4374	24017	4575	21789	2234	4793	-7.96931	1.46785	18.1032	2.09247e-05	0.000224201	0	0.0554982	5.56682e-148	0	0	5.96059e-212	30.492	209.378	102.998	107.973	63.217	106.054	67.098	423.671	73.029	321.911	50.834	111.974	5	4+
8842	PROM1	982	2181	23	2323	49	290	138	160	153	325	96	1003	-10.5994	2.28693	35.4704	2.58951e-09	6.24039e-08	1.45486e-118	0	2.4195e-57	0.0741731	1.25365e-11	4.31522e-191	10.04	24.513	0.208	27.248	0.53	4.122	1.767	2.353	2.024	3.901	1.806	19.244	5	4+
11148	HHLA2	180	2533	101	366	61	1970	50	13	63	165	70	119	-10.9047	1.91457	23.1751	1.47898e-06	2.03833e-05	0	6.33311e-51	0	3.63607e-05	2.42144e-09	0.000925496	2.685	41.026	1.341	6.254	0.95	40.832	0.909	0.272	1.192	2.895	1.889	3.299	5	4+
8840	WISP1	529	659	53	341	108	641	169	554	55	928	150	123	-11.0867	1.91028	26.451	2.70311e-07	4.37795e-06	3.61398e-06	5.97177e-68	4.92934e-125	1.98671e-56	1.77945e-187	0.200681	4.744	6.431	0.422	3.504	1.013	7.988	3.284	12.948	1.066	9.787	2.441	2.054	5	4+
5471	PPAT	191	585	183	554	96	242	168	290	103	494	156	192	-11.3678	1.36238	16.2957	5.41868e-05	0.000527787	9.37414e-52	1.66362e-64	1.20964e-24	5.13104e-11	4.54034e-54	0.0804195	2	6.66	1.703	6.645	1.051	3.521	2.152	4.269	1.371	6.08	2.96	3.739	5	4+
2444	FRK	139	314	124	391	29	343	73	111	63	308	72	74	-11.7905	1.55216	19.0281	1.28811e-05	0.000143969	2.13491e-18	3.93956e-48	1.89248e-87	0.00180968	1.12238e-34	1	1.932	4.742	1.534	6.227	0.421	6.626	1.238	2.165	1.112	5.037	1.812	1.913	5	4+
80258	EFHC2	287	455	97	246	49	301	61	44	70	481	84	339	-11.5821	1.55737	19.1611	1.20134e-05	0.000135644	7.13016e-12	3.79924e-24	3.83199e-60	0.386342	2.15593e-67	3.36634e-37	3.451	5.945	1.037	3.388	0.616	5.028	0.896	0.743	1.069	6.799	1.829	7.579	5	4+
79017	GGCT	173	458	119	333	137	128	148	226	84	592	220	635	-11.3244	1.33221	15.3426	8.96706e-05	0.000823354	6.93784e-34	1.48664e-36	0.173753	3.04733e-06	1.65715e-84	6.03732e-47	13.008	35.861	12.251	28.578	10.191	15.691	15.402	22.535	12.559	65.786	28.755	86.481	5	4+
6273	S100A2	52	84	16	94	12	61	11	35	13	47	35	41	-13.1951	1.55714	17.4789	2.90509e-05	0.000299792	0.00354411	1.14883e-18	8.68696e-12	0.000290879	9.28817e-05	0.709011	2.688	4.668	0.748	5.563	0.637	4.386	0.672	2.485	0.842	2.884	3.241	3.929	5	4+
135398	C6orf141	45	79	30	61	24	114	19	60	11	155	12	132	-12.8024	2.16765	33.8934	5.82169e-09	1.30973e-07	0.00114603	5.21051e-05	1.0493e-20	1.9108e-06	5.80071e-30	4.39501e-26	1.139	2.166	0.679	1.769	0.631	4.011	0.581	2.117	0.352	4.628	0.548	6.207	5	4+
9212	AURKB	49	142	23	122	33	49	34	91	27	90	27	33	-12.8324	1.37483	14.9661	0.000109462	0.000986321	1.48506e-12	1.56016e-22	0.00591373	7.95077e-08	1.70244e-07	0.643937	1.801	5.635	0.76	5.136	1.254	2.504	1.496	4.633	1.25	3.913	1.785	2.251	5	4+
3070	HELLS	99	198	40	261	32	97	48	143	24	171	57	100	-12.0317	1.78102	25.4673	4.49934e-07	6.87926e-06	6.92962e-10	1.66943e-52	1.636e-12	1.83403e-13	1.80458e-25	0.00148643	1.233	2.68	0.443	3.724	0.417	1.679	0.73	2.501	0.38	2.504	1.286	2.316	5	4+
654790	PCP4L1	50	830	275	149	149	83	53	254	168	691	105	581	-11.0505	1.58589	17.7063	2.57777e-05	0.000270653	2.8192e-193	0.000371857	0.0362934	1.68091e-36	6.34745e-65	2.03067e-80	1.492	26.793	7.354	5.093	4.612	3.444	1.904	10.54	6.33	24.353	5.648	32.201	5	4+
26996	GPR160	226	2167	424	1594	116	847	153	173	197	1086	214	295	-10.2569	1.91971	28.9812	7.30827e-08	1.30665e-06	0	4.15578e-224	2.00906e-182	0.0905257	4.82595e-131	0.000619303	4.657	48.421	7.798	37.625	2.489	24.259	3.824	4.983	5.143	26.368	7.969	11.297	5	4+
55228	PNMAL1	136	1124	62	210	41	299	67	148	19	285	38	62	-11.4905	2.28511	39.7465	2.89155e-10	8.30282e-09	2.99922e-206	6.62475e-28	8.38872e-65	1.80047e-09	3.91877e-56	0.0342621	2.04	19.537	0.645	3.987	0.739	4.858	2.09	3.461	0.595	6.121	1.543	1.414	5	4+
9319	TRIP13	20	68	14	62	16	31	16	109	17	56	13	27	-13.1029	1.78897	23.026	1.59822e-06	2.19258e-05	1.15787e-07	9.54462e-11	0.00287342	8.16326e-20	3.82891e-05	0.0549427	2.914	4.696	1.118	8.689	1.111	3.547	1.751	7.301	1.185	3.63	2.204	3.504	5	4+
131578	LRRC15	239	333	227	648	116	907	123	1034	42	8377	44	86	-9.77877	2.5631	43.8441	3.55598e-11	1.2e-09	7.20904e-06	3.94743e-71	1.77896e-200	5.08038e-199	0	0.00058148	1.554	2.356	1.309	4.827	0.79	8.192	0.981	9.47	1.036	63.942	0.519	1.04	5	4+
84152	PPP1R1B	257	1427	545	2431	408	459	393	1581	412	479	260	642	-10.0489	1.4452	17.5165	2.84831e-05	0.000295094	6.42434e-211	0	4.96061e-08	2.36779e-193	0.539846	1.53743e-37	9.06	54.324	17.254	98.13	14.88	22.495	16.601	77.251	18.299	19.965	16.493	42.006	5	4+
3485	IGFBP2	979	5457	937	702	1282	5390	1241	642	787	6041	333	3863	-9.16777	1.73327	21.4618	3.6094e-06	4.60702e-05	0	0.437121	0	6.05421e-31	0	0	30.25	182.296	25.951	24.838	41.059	231.503	46.111	27.562	30.685	220.452	18.537	221.612	5	4+
112399	EGLN3	300	224	186	1426	104	175	173	241	102	661	143	2324	-10.686	1.7936	23.2261	1.44026e-06	1.99282e-05	0.0145549	3.31888e-304	4.27556e-10	5.95204e-05	4.04624e-89	0	4.413	3.578	2.436	24.026	1.597	3.577	3.101	4.971	1.905	11.439	3.807	63.551	5	4+
6804	STX1A	135	128	69	229	108	156	47	331	56	102	25	203	-11.5404	1.50305	17.4246	2.98928e-05	0.000307724	1	1.48194e-29	8.7714e-07	6.66862e-59	0.00436384	4.18672e-35	2.773	2.872	1.26	5.394	2.328	4.456	1.19	9.658	1.475	3.506	0.938	7.798	5	4+
389434	IYD	69	657	161	714	66	543	23	19	43	321	95	151	-10.9519	2.09133	32.1431	1.43227e-08	2.96484e-07	1.11149e-127	3.82026e-114	2.1789e-123	1	5.30622e-48	0.000911801	0.35	7.36	2.184	6.784	1.808	4.594	1.556	0.137	0.316	4.685	2.695	3.036	5	4+
63910	SLC17A9	455	715	170	303	186	410	85	428	93	533	33	62	-10.7584	1.43836	17.5928	2.73618e-05	0.000285449	1.61746e-17	1.25094e-17	3.77786e-35	9.5946e-63	8.80281e-67	0.00675937	7.007	11.956	2.331	5.345	2.99	8.774	1.595	9.24	1.818	9.659	0.92	1.775	5	4+
124540	MSI2	137	271	61	425	45	271	126	153	69	156	78	152	-11.3374	1.47476	17.5721	2.76611e-05	0.000287857	9.54283e-13	4.71617e-88	4.4452e-54	0.0308377	7.00137e-07	3.07841e-06	12.536	26.366	5.318	44.475	4.157	34.512	13.205	18.804	8.805	17.105	12.639	25.693	5	4+
55384	MEG3	236	283	244	128	207	602	249	287	101	977	52	7364	-10.1746	1.57255	16.3875	5.16247e-05	0.00050494	0.00973072	0.000255166	1.97707e-70	0.0133414	1.36721e-162	0	8.915	11.58	8.361	5.542	8.055	31.701	11.105	14.967	4.823	44.189	3.555	521.648	5	3+
255027	MPV17L	31	171	22	67	17	55	15	5	13	62	16	57	-13.1369	1.59851	17.8677	2.36807e-05	0.000250533	2.93343e-26	7.73061e-09	1.09936e-07	0.0815857	1.63776e-07	3.26436e-06	2.136	4.058	0.864	3.688	0.343	2.081	0.783	0.174	0.321	2.879	2.876	3.616	5	3+
23601	CLEC5A	282	251	187	242	116	786	129	169	122	1147	204	718	-11.0331	1.43514	16.0735	6.09307e-05	0.000583989	0.703221	7.04315e-07	4.54075e-164	0.0037196	1.70017e-188	1.92197e-67	3.124	3.023	1.842	3.072	1.344	12.1	1.747	2.631	1.718	14.939	4.095	14.794	5	3+
7804	LRP8	146	204	65	317	83	387	76	127	40	159	49	60	-11.9493	1.38024	15.4274	8.57357e-05	0.000791378	0.00051893	2.0473e-54	3.96179e-66	7.70962e-05	2.69158e-15	0.452319	1.887	2.869	0.751	4.695	1.119	6.955	1.196	2.312	0.66	2.428	1.152	1.449	5	3+
3161	HMMR	41	149	21	152	18	65	67	91	14	167	67	66	-12.6332	1.76584	22.9953	1.62402e-06	2.22362e-05	1.18673e-16	5.7887e-32	2.83449e-10	0.0243477	7.84352e-31	1	0.58	2.299	0.264	2.463	0.267	2.739	1.167	1.825	0.254	2.843	1.728	3.636	4	5+
127602	DNAH14	11	111	12	61	10	31	11	10	15	64	14	28	-13.376	1.81622	21.7135	3.16559e-06	4.08646e-05	6.36048e-23	6.89295e-12	9.83681e-05	1	3.89996e-07	0.0620852	0.702	7.306	0.669	4.286	0.628	2.647	0.792	0.839	1.149	4.675	1.535	3.184	4	5+
1733	DIO1	16	104	14	93	4	41	6	8	6	246	12	14	-12.5762	2.59553	38.4522	5.61121e-10	1.52762e-08	8.90708e-18	4.34456e-19	4.29815e-10	1	4.76634e-59	1	0.852	5.288	0.503	5.876	0.518	2.268	0.285	0.476	0.301	12.365	0.861	2.156	4	5+
8339	HIST1H2BG	5	4	2	12	4	18	7	33	6	46	2	107	-13.4059	2.68435	34.3644	4.57001e-09	1.04836e-07	1	0.0126875	0.00104597	1.64942e-05	1.83136e-07	7.93687e-29	1.048	0.864	0.407	2.871	0.806	5.266	1.539	8.73	1.489	11.893	0.719	41.056	4	5+
203111	C8orf47	4	46	0	235	2	7	2	3	6	24	7	29	-13.0113	3.1236	39.6576	3.0262e-10	8.65394e-09	6.21929e-10	1.40849e-76	0.172719	1	0.00275447	0.000517977	1.141	13.501	0.193	76.89	0.593	4.601	0.564	1.083	2.064	9.064	3.518	15.828	4	5+
6531	SLC6A3	23	426	16	91	53	250	15	18	11	213	28	465	-12.072	3.06001	62.4102	2.78877e-15	1.94473e-13	4.87901e-102	6.48293e-18	4.64589e-43	0.582024	5.40009e-45	3.70267e-102	0.225	4.536	0.139	1.021	0.543	3.401	0.18	0.248	0.137	2.451	0.497	8.467	4	4+
3053	SERPIND1	161	3753	54	24	75	765	87	109	99	740	29	66	-10.7622	1.98008	25.4855	4.45709e-07	6.82878e-06	0	0.0358819	2.76478e-187	0.0467674	7.8893e-109	0.000365129	2.953	74.681	0.883	0.504	1.434	19.499	1.939	2.798	2.302	15.982	0.962	2.25	4	4+
84069	PLEKHN1	20	37	14	39	15	94	13	65	8	125	3	29	-13.3198	2.41079	37.9758	7.16277e-10	1.91524e-08	0.0198503	6.76283e-05	1.77786e-19	5.65656e-10	9.24854e-26	4.67132e-06	0.402	1.142	0.54	3.097	0.49	4.648	0.323	2.953	0.376	4.811	0.238	1.505	4	4+
3223	HOXC6	3	97	37	227	26	88	15	20	0	97	7	1	-13.0289	2.46136	33.8718	5.88647e-09	1.32146e-07	8.51907e-27	1.82511e-44	1.6088e-12	0.388276	2.43382e-26	0.128146	0.087	5.129	2.124	8.712	0.781	4.371	1.077	0.806	0.355	3.316	0.794	0.406	4	4+
254827	NAALADL2	126	413	98	347	45	89	132	118	68	387	84	354	-11.7318	1.55122	20.0826	7.41689e-06	8.75101e-05	4.83079e-40	2.92569e-47	5.20026e-07	1	2.05009e-48	2.65092e-40	0.978	3.489	0.675	3.087	0.366	0.96	1.256	1.29	0.672	3.529	1.183	5.113	4	4+
205	AK4	344	180	283	816	157	183	186	338	69	1356	151	1270	-10.8737	1.54756	17.3032	3.18647e-05	0.000326264	2.44771e-10	1.58956e-90	0.000265327	4.22189e-14	3.84546e-284	1.18327e-220	1.906	1.086	1.391	5.181	0.912	1.409	1.266	2.64	0.487	8.821	1.518	13.093	4	4+
54848	ARHGEF38	23	137	36	151	14	41	34	38	28	141	42	104	-12.7846	1.71797	22.7942	1.80307e-06	2.44485e-05	1.20614e-21	6.06423e-24	8.48222e-06	0.528049	5.95677e-17	7.4105e-07	0.702	4.523	0.985	5.279	0.443	1.74	1.249	1.612	1.079	5.084	2.311	5.896	4	4+
9080	CLDN9	67	514	46	130	45	66	19	227	48	172	9	24	-12.235	2.0168	30.3289	3.6466e-08	6.95837e-07	6.94305e-92	3.13482e-15	0.00135664	3.07695e-50	5.00495e-15	0.0196676	1.294	10.763	0.792	2.875	0.905	1.771	0.445	6.129	1.174	3.911	0.314	0.861	4	4+
3786	KCNQ3	231	855	312	347	142	800	95	390	55	4934	385	1537	-10.2368	2.37993	41.8832	9.68922e-11	3.0583e-09	4.2821e-92	2.26582e-05	6.90379e-152	3.64817e-49	0	9.12068e-163	0.801	3.231	0.959	1.379	0.517	3.855	0.405	1.909	0.243	20.081	2.425	9.921	4	4+
9088	PKMYT1	46	84	12	83	25	49	32	106	10	137	7	9	-13.0584	1.81846	22.8628	1.73983e-06	2.37136e-05	0.000413545	1.10964e-17	0.000273081	3.15842e-11	4.66938e-27	1	0.968	2.882	0.211	2.211	0.518	1.337	1.499	4.041	0.252	3.151	0.432	0.443	4	4+
11001	SLC27A2	187	200	49	1209	35	74	79	108	56	292	53	118	-11.7434	1.55711	18.0916	2.10524e-05	0.000225454	0.288387	0	8.97659e-07	0.0157332	2.56545e-34	1.82165e-06	5.043	5.254	0.936	46.011	1.468	3.031	2.872	4.496	2.658	10.714	1.886	5.039	4	4+
128272	ARHGEF19	248	1345	620	436	259	1152	258	256	270	1012	85	346	-10.8051	1.39889	15.9104	6.64115e-05	0.000629904	1.21121e-195	0.103674	5.1333e-190	0.477687	8.11409e-86	3.12735e-38	3.224	18.997	7.17	6.493	3.518	20.808	4.093	4.671	4.459	15.471	2.001	8.363	4	4+
4751	NEK2	22	101	6	104	5	27	18	43	6	65	8	17	-13.5063	2.41901	36.8755	1.25918e-09	3.21457e-08	6.21428e-14	1.40092e-29	1.5449e-05	0.00134963	7.38081e-12	0.136933	0.801	3.968	0.196	4.334	0.188	1.366	0.784	2.168	0.358	3.991	0.583	1.443	4	4+
701	BUB1B	96	226	35	479	19	102	93	292	26	257	77	109	-12.0497	2.15757	34.9466	3.38869e-09	7.99198e-08	9.0159e-15	3.80726e-124	9.75325e-20	6.93085e-29	6.15739e-44	0.0391428	0.996	2.549	0.322	5.693	0.206	1.47	1.181	4.255	0.343	3.131	1.446	2.101	4	4+
6296	ACSM3	90	537	217	1125	109	336	130	163	88	781	145	192	-11.2793	1.80403	26.226	3.03703e-07	4.86992e-06	2.53021e-83	7.90872e-198	6.17814e-42	0.0140765	5.92958e-125	0.0167453	2.847	18.361	6.154	40.749	3.573	14.774	5.504	7.161	3.512	29.182	8.31	11.275	4	4+
402415	XKRX	43	861	78	84	85	249	70	530	93	88	64	195	-11.7516	1.77158	22.6289	1.96511e-06	2.64408e-05	6.5861e-208	0.0923333	7.08314e-30	1.35096e-97	0.458283	5.44019e-16	0.6	13.053	0.969	1.343	1.239	4.829	1.191	10.377	1.648	1.445	1.617	5.06	4	4+
23624	CBLC	31	257	24	640	20	76	15	12	19	40	6	59	-12.5054	2.40326	36.0487	1.9245e-09	4.72458e-08	1.40805e-47	8.28006e-190	9.23027e-12	1	0.0312745	1.3027e-11	1.743	9.713	0.752	28.162	1.058	6.129	0.628	0.723	0.839	1.654	0.379	3.939	4	4+
64151	NCAPG	57	200	25	258	24	67	75	229	26	180	96	89	-12.4047	1.85878	26.3837	2.79888e-07	4.51912e-06	1.57854e-21	3.13069e-62	5.41883e-08	1.07487e-21	1.05016e-25	0.899644	0.659	2.521	0.256	3.417	0.292	1.076	1.07	3.743	0.384	2.439	2.017	1.915	4	4+
1470	CST2	19	121	8	21	9	89	8	8	7	43	0	6	-13.7687	2.2861	28.4111	9.81033e-08	1.72029e-06	4.11831e-20	0.00909099	7.90929e-22	1	2.831e-06	0.032543	1.627	11.035	0.629	2.057	0.78	10.606	0.788	0.923	0.741	4.406	0	0.95	4	4+
10840	ALDH1L1	40	290	121	217	150	120	16	8	61	360	2	137	-12.2669	1.67533	19.0368	1.28222e-05	0.000143617	4.99515e-51	4.78962e-13	0.971096	0.257017	8.90366e-46	1.44183e-37	0.505	3.98	1.359	3.14	1.98	2.106	0.247	0.142	0.979	5.347	0.046	3.217	4	4+
608	TNFRSF17	48	68	9	137	10	95	40	225	5	10	14	77	-12.9907	2.38481	36.1909	1.78904e-09	4.43439e-08	0.0418957	1.5913e-37	7.60641e-23	1.01387e-35	0.416019	2.88651e-11	2.399	3.655	0.406	7.838	0.514	6.603	2.367	15.457	0.313	0.593	1.254	7.134	4	4+
55083	KIF26B	164	356	55	601	33	941	172	1755	99	1950	37	129	-10.8476	3.21113	71.167	3.28231e-17	3.41068e-15	2.36776e-19	4.70346e-146	3.20044e-289	0	0	1.25655e-12	0.842	1.991	0.25	3.536	0.178	6.713	1.085	12.708	0.648	11.754	0.345	1.233	4	4+
79679	VTCN1	89	641	4	987	17	333	3	2	9	190	6	34	-11.8475	3.93857	78.6185	7.53424e-19	9.70207e-17	2.37872e-110	0	6.29452e-96	1	8.2372e-41	1.55585e-05	1.375	10.751	0.055	17.464	0.274	7.148	0.056	0.043	0.176	3.454	0.168	0.976	4	4+
112937	GLB1L3	5	219	0	22	2	341	1	19	0	210	2	1086	-12.0414	7.32878	177.777	1.48153e-40	3.45526e-37	3.61779e-60	2.78053e-07	8.05165e-112	6.65439e-05	7.01898e-59	0	0.067	3.192	0	0.338	0.028	6.357	0.016	0.358	0	3.313	0.049	27.081	4	4+
1763	DNA2	79	351	76	420	105	171	105	119	49	149	87	191	-11.9047	1.41191	16.7853	4.18567e-05	0.000418966	5.72486e-45	7.12334e-77	2.3906e-09	0.19469	1.07785e-10	1.26084e-09	0.709	3.426	0.606	4.318	0.986	2.132	1.154	1.502	0.559	1.571	1.415	3.188	4	4+
83416	FCRL5	291	317	51	558	54	361	142	1251	9	72	29	299	-11.3139	2.75515	52.894	3.52035e-13	1.69867e-11	0.112889	5.96828e-136	5.71081e-75	1.36593e-244	1.01944e-11	8.94599e-57	2.066	2.456	0.321	4.541	0.403	4.024	1.244	12.578	0.082	1.197	1.484	3.957	4	4+
50489	CD207	102	400	48	61	26	147	38	15	16	784	27	880	-11.6139	2.42865	34.8807	3.50537e-09	8.22097e-08	4.91995e-46	0.0276537	5.92124e-29	0.0128712	2.05447e-191	3.08868e-222	2.298	9.766	0.966	1.574	0.609	4.603	1.037	0.472	0.456	20.819	1.099	36.835	4	4+
80008	TMEM156	107	94	24	152	23	77	40	198	7	26	18	255	-12.5269	2.12057	30.6651	3.06635e-08	5.943e-07	0.850852	8.72628e-31	2.84807e-11	2.06065e-29	0.00832174	6.36184e-54	2.399	2.284	0.481	3.903	0.536	2.399	1.086	6.197	0.199	0.687	0.729	10.621	4	4+
725	C4BPB	17	258	23	138	32	73	33	19	6	79	33	33	-12.8434	1.80828	21.3779	3.77096e-06	4.77974e-05	2.0104e-59	9.59224e-27	1.75096e-07	0.21885	1.8899e-15	1	1.087	17.629	1.329	10.089	2.094	6.486	2.47	1.647	0.475	5.975	3.741	3.881	4	4+
91683	SYT12	52	236	2	260	9	60	9	72	1	1375	0	782	-11.4975	5.17421	124.828	5.54968e-29	3.23577e-26	3.42655e-31	1.13543e-84	1.50642e-13	5.15528e-14	0	4.64636e-235	0.594	2.93	0.02	3.402	0.107	0.952	0.126	1.155	0.015	18.461	0	16.608	4	4+
83540	NUF2	26	92	8	96	14	36	22	75	14	105	47	39	-13.1028	1.86541	24.4655	7.56542e-07	1.10047e-05	2.21051e-10	7.79289e-25	8.47915e-05	7.85281e-09	1.69511e-16	0.654237	0.626	2.402	0.172	2.649	0.351	1.206	0.807	2.52	0.427	2.98	2.043	1.745	4	4+
259	AMBP	8	90	10	162	14	43	4	9	18	81	2	47	-13.2214	2.85366	48.1823	3.88371e-12	1.56467e-10	9.5116e-20	4.50425e-44	2.02026e-06	0.29846	2.07064e-09	1.08771e-11	0.245	2.979	0.274	5.678	0.444	1.83	0.147	0.383	0.695	2.928	0.11	2.671	4	4+
1944	EFNA3	21	101	38	52	22	76	30	112	13	156	2	18	-12.9487	2.13115	31.8757	1.64358e-08	3.33966e-07	2.09474e-14	0.0193178	7.64844e-11	2.15675e-13	1.00984e-28	0.000595396	0.501	2.612	0.811	1.422	0.546	2.522	0.866	3.73	0.393	4.391	0.086	0.798	4	4+
7368	UGT8	37	74	88	512	17	28	23	101	31	173	49	147	-12.2571	1.81146	25.6291	4.1376e-07	6.3859e-06	0.00038059	6.05428e-96	0.0210207	4.25773e-14	1.23154e-21	4.62683e-12	0.63	1.367	1.335	9.984	0.589	0.778	0.476	2.408	0.669	3.467	1.509	4.652	4	4+
6286	S100P	294	1141	46	2005	51	413	10	128	84	114	22	38	-11.0347	2.53925	41.5568	1.14494e-10	3.56563e-09	4.66623e-128	0	1.92626e-93	1.16016e-29	0.200796	0.0765569	44.744	181.653	6.615	348.556	7.636	87.595	1.664	25.323	15.438	21.098	5.83	10.631	4	4+
9518	GDF15	696	1570	178	180	187	4518	74	143	145	194	89	430	-10.142	1.47057	16.471	4.94003e-05	0.000485673	4.70929e-88	0.0328951	0	1.82899e-07	0.112971	2.19457e-54	26.481	64.453	6.089	7.841	7.352	238.98	3.366	7.529	6.943	8.732	6.088	30.357	4	4+
4319	MMP10	109	789	3	1641	7	66	36	189	8	29	22	7	-11.204	2.74246	41.7419	1.04153e-10	3.26782e-09	6.86406e-136	0	6.21087e-16	1.0988e-28	0.00480802	0.0177779	2.611	20.473	0.064	45.022	0.174	2.197	1.043	6.315	0.242	0.819	0.951	0.311	4	4+
9401	RECQL4	125	329	101	711	96	106	84	403	53	325	26	48	-11.3924	1.74732	24.3779	7.91728e-07	1.14689e-05	1.73361e-24	1.58679e-146	0.02099	8.49395e-57	8.45506e-43	0.0228118	1.262	3.613	0.906	8.225	1.014	1.487	1.038	5.722	0.681	3.857	0.476	0.901	4	4+
4151	MB	17	31	3	254	5	11	5	39	9	114	3	122	-12.7601	3.36121	58.6174	1.91516e-14	1.16858e-12	0.0345679	1.42695e-82	0.0827639	3.91096e-08	4.68497e-22	7.1275e-32	0.833	1.635	0.133	14.255	0.252	0.75	0.29	2.63	0.553	6.63	0.264	11.088	4	4+
80128	TRIM46	89	251	49	168	64	196	34	58	35	146	19	76	-12.101	1.6621	22.8629	1.73976e-06	2.37136e-05	7.56391e-21	6.70418e-23	1.28796e-24	0.0083705	1.42851e-14	7.5828e-09	1.117	3.424	0.547	2.416	0.84	3.419	0.521	1.022	0.558	2.156	0.432	1.774	4	4+
6285	S100B	283	309	74	65	89	235	45	89	49	293	32	626	-11.4873	1.5056	16.9617	3.81409e-05	0.000385263	0.107363	0.650369	3.31999e-25	3.17913e-05	8.43529e-38	1.97856e-144	11.829	13.922	2.785	3.111	3.838	13.658	2.242	5.137	2.574	14.503	2.402	48.539	4	4+
51678	MPP6	58	384	60	204	62	75	86	96	38	212	70	156	-11.997	1.47104	17.6778	2.61665e-05	0.000274343	5.3562e-64	2.7477e-27	0.0152225	0.303713	1.04016e-26	2.97141e-08	1.084	7.783	1	4.366	1.207	1.947	1.952	2.51	0.9	4.665	2.365	5.417	4	4+
79623	GALNT14	41	115	69	771	62	46	92	382	60	190	25	255	-11.6574	1.99138	29.4429	5.75879e-08	1.05294e-06	3.40648e-10	1.49646e-188	1	8.64627e-49	6.41892e-14	2.49405e-48	0.593	1.808	0.889	12.782	0.937	0.925	1.623	7.754	1.102	3.235	0.655	6.861	4	4+
100533106	ZHX1-C8ORF76	20	83	20	75	25	34	11	31	9	49	12	12	-13.3681	1.47269	15.1904	9.71972e-05	0.00088549	6.16233e-11	1.2202e-11	0.048091	0.00162729	1.12929e-06	1	1.209	5.562	1.043	5.199	1.632	2.85	0.864	2.745	0.71	3.423	1.341	1.356	4	4+
10110	SGK2	11	157	35	463	16	67	21	5	15	138	13	11	-12.4523	2.11531	25.9234	3.55233e-07	5.60206e-06	1.56587e-35	4.52539e-119	9.60656e-12	0.00615923	7.93309e-23	1	0.29	6.1	0.762	16.244	1.35	3.154	0.751	0.819	0.654	6.472	0.572	0.498	4	4+
26011	ODZ4	445	560	281	538	147	645	207	707	187	1260	63	866	-10.6272	1.98555	31.3616	2.14172e-08	4.24102e-07	1.16155e-05	1.74393e-34	1.71242e-105	8.64071e-75	1.16286e-173	2.06939e-181	1.206	1.653	0.674	1.67	0.418	2.428	0.69	2.705	0.646	4.005	0.31	4.367	4	4+
51557	LGSN	20	974	12	420	14	397	12	71	5	200	19	23	-11.6298	4.15579	94.5841	2.34893e-22	5.18991e-20	2.02396e-270	1.35842e-130	1.84224e-122	6.69287e-12	2.18601e-47	0.76182	0.26	16.323	0.27	5.78	0.113	8.649	0.201	1.515	0.049	2.647	0.265	0.777	4	4+
256714	MAP7D2	43	534	18	137	14	205	22	26	12	1459	11	782	-11.1195	4.04265	93.357	4.36635e-22	9.16497e-20	1.18966e-114	4.65155e-30	1.34189e-55	0.582094	0	7.84514e-214	1.345	6.445	0.176	1.761	0.162	3.148	1.102	0.407	0.17	19.043	0.222	16.149	4	4+
25789	TMEM59L	30	243	23	28	9	488	9	15	8	107	5	121	-12.2197	3.05624	53.5004	2.58538e-13	1.26793e-11	1.03058e-44	0.183995	1.89465e-160	0.192536	5.47771e-21	2.65809e-29	0.751	6.589	0.515	0.803	0.234	16.982	0.272	0.524	0.253	3.159	0.226	5.627	4	4+
127707	KLHDC7A	83	527	183	301	78	784	69	31	43	223	63	422	-11.2701	1.91378	26.4968	2.63976e-07	4.29523e-06	5.41517e-85	4.71728e-15	3.60685e-191	0.00230423	3.75323e-26	3.73665e-66	0.623	4.306	1.22	2.589	0.613	8.179	0.635	0.328	0.411	1.967	0.858	5.894	4	4+
56521	DNAJC12	4	51	5	78	8	4	5	6	1	20	1	16	-13.9166	2.55935	28.8772	7.7116e-08	1.37408e-06	2.97565e-11	2.68672e-21	0.986584	1	4.71558e-05	0.000398465	1.755	20.191	0.897	17.583	1.45	1.042	1.24	2.165	0.611	6.72	1.277	24.705	4	4+
51804	SIX4	165	582	55	1000	45	142	41	232	48	308	62	433	-11.1427	2.62647	53.8124	2.20572e-13	1.09333e-11	2.39993e-60	1.0611e-276	8.99998e-19	4.69255e-37	1.80861e-41	2.06666e-69	0.99	3.801	0.293	6.873	0.283	1.184	0.302	1.962	0.367	2.169	0.675	4.833	4	4+
84951	TNS4	286	1250	38	289	22	435	37	51	39	156	31	626	-11.0965	2.72333	51.9388	5.72565e-13	2.64135e-11	9.57148e-156	4.7427e-62	8.44503e-126	0.107029	4.50812e-15	1.87683e-145	2.699	12.829	0.319	3.124	0.217	5.703	0.427	0.677	0.468	1.73	0.53	10.987	4	4+
6657	SOX2	85	197	51	241	25	31	39	52	46	170	19	417	-11.9612	1.7387	22.511	2.08945e-06	2.8024e-05	2.11337e-12	6.58713e-41	0.10342	0.140156	2.57107e-15	1.04214e-97	1.363	3.429	0.728	4.426	0.418	0.691	0.761	1.168	0.936	3.207	0.551	12.427	4	4+
222962	SLC29A4	76	588	88	249	45	243	59	50	111	527	15	14	-11.5531	1.61053	19.3443	1.09145e-05	0.000124644	9.8711e-105	7.05363e-28	2.27276e-45	1	5.47664e-57	1	1.042	8.752	1.071	3.911	0.645	4.63	0.988	1.288	1.928	8.476	0.371	0.356	4	4+
283104	LOC283104	54	197	70	129	51	86	44	68	38	183	16	138	-12.2069	1.59491	20.6303	5.57062e-06	6.7784e-05	4.44211e-22	1.32105e-08	1.461e-05	0.0185413	1.0745e-20	8.98272e-25	0.801	3.17	0.922	2.191	0.79	1.771	0.796	1.411	0.714	3.186	0.429	3.797	4	4+
4745	NELL1	7	190	15	31	12	171	31	2	3	806	20	114	-11.9403	3.01777	45.1821	1.79541e-11	6.37659e-10	3.30751e-49	0.00548218	6.26953e-46	5.05626e-07	1.12092e-217	1.23481e-16	0.093	4.695	0.178	0.474	0.167	3.174	0.885	0.261	0.051	17.694	1.088	3.802	4	4+
83461	CDCA3	23	93	12	88	13	33	49	112	7	54	23	22	-13.1243	1.73923	21.5184	3.50444e-06	4.48525e-05	8.9682e-12	5.6451e-19	0.000491873	1.03433e-07	1.44648e-08	1	0.924	4.028	0.434	4.047	0.539	1.843	2.349	6.218	0.354	2.567	1.66	1.639	4	4+
1946	EFNA5	277	1186	495	1917	345	250	321	247	277	927	222	2722	-10.2699	1.46803	16.7827	4.19146e-05	0.000419346	4.47139e-145	4.37592e-275	0.749358	0.102565	5.60478e-69	0	1.971	9.184	3.126	15.628	2.572	2.471	2.802	2.475	2.509	7.746	2.865	36.031	4	4+
9957	HS3ST1	372	1138	211	1659	169	109	137	515	135	148	56	513	-10.8462	1.59638	19.0728	1.25826e-05	0.000141084	5.34277e-100	0	0.305766	7.0005e-60	1	2.42586e-93	7.92	26.265	4.01	40.455	3.745	3.225	3.536	15.319	3.64	3.713	2.154	20.295	4	4+
10403	NDC80	58	71	16	176	25	51	68	130	23	123	34	69	-12.6571	1.51422	17.5346	2.82121e-05	0.000292575	0.196549	4.14288e-43	0.000129413	1.44976e-06	2.65286e-15	0.00137451	1.079	1.433	0.265	3.751	0.485	1.319	1.537	3.385	0.543	2.695	1.144	2.386	4	4+
53836	GPR87	22	241	1	160	7	20	1	33	1	207	12	58	-12.758	3.99989	83.7884	5.50672e-20	8.25614e-18	3.78637e-50	5.1488e-52	0.00728289	9.13479e-09	2.72878e-56	5.20892e-08	0.635	7.526	0.026	5.289	0.21	0.803	0.035	1.325	0.036	7.054	0.624	3.109	4	4+
79368	FCRL2	112	116	43	227	23	69	47	426	21	116	18	435	-11.9849	2.43076	41.0443	1.48819e-10	4.49454e-09	0.661017	1.87114e-41	5.75039e-09	5.76063e-85	1.08862e-14	7.52692e-104	1.74	1.956	0.595	4.039	0.373	1.489	0.889	9.275	0.414	2.12	0.506	12.561	4	4+
79782	LRRC31	19	1095	71	1256	35	706	33	12	14	36	17	465	-11.1634	3.5967	67.0866	2.59842e-16	2.2631e-14	3.24728e-308	0	2.04072e-204	0.0153095	0.0118799	1.80274e-113	0.305	19.057	1.014	23.064	0.585	15.728	0.644	0.27	0.285	0.679	0.493	13.857	4	4+
401409	RAB19	25	95	24	150	24	59	13	97	11	10	7	12	-13.1281	1.75729	20.4158	6.23133e-06	7.50405e-05	2.26414e-11	5.07238e-30	1.79072e-06	7.1285e-18	1	0.410223	1.327	5.418	1.153	9.112	1.307	4.355	0.815	7.064	0.731	0.63	0.665	1.18	4	4+
283208	P4HA3	56	98	148	143	31	175	103	234	28	409	15	90	-12.0623	1.81677	24.7366	6.57252e-07	9.70845e-06	0.000381276	0.149984	4.43831e-34	2.226e-15	6.37231e-80	1.00256e-13	1.009	1.916	2.378	2.952	0.582	4.382	2.256	5.902	0.64	8.678	0.489	3.014	4	4+
10635	RAD51AP1	54	103	35	96	39	70	33	111	21	119	52	74	-12.702	1.36216	15.1505	9.92733e-05	0.000902836	4.27415e-05	4.52753e-11	3.9673e-05	4.90754e-12	2.39435e-15	0.0957893	1.04	3.416	0.749	2.134	0.788	1.875	0.784	3.038	1.2	2.7	1.83	2.666	4	4+
990	CDC6	44	259	46	431	28	102	79	265	23	227	44	67	-12.0082	2.27135	39.6646	3.01549e-10	8.63507e-09	8.32007e-41	6.04413e-100	1.48325e-15	5.84077e-28	2.11546e-38	0.0582271	0.57	3.646	0.53	6.397	0.379	1.836	1.249	4.82	0.379	3.459	1.032	1.614	4	4+
23475	QPRT	163	1786	316	1101	262	944	168	182	218	972	62	78	-10.1706	1.67955	22.6955	1.89815e-06	2.56549e-05	0	7.74155e-146	2.09294e-133	0.159833	1.80656e-98	0.291035	4.51	53.477	7.827	34.888	7.525	36.306	5.605	7.01	7.621	31.74	3.094	4.008	4	4+
347733	TUBB2B	69	159	24	216	47	547	13	20	8	83	9	17	-11.8112	2.25949	33.3186	7.82292e-09	1.70689e-07	2.17402e-10	1.02941e-49	4.14e-139	0.214023	4.65014e-15	0.210916	2.081	5.2	0.639	7.457	1.487	22.88	0.482	0.845	0.305	2.919	0.489	0.946	4	4+
3832	KIF11	127	291	57	483	59	147	123	223	40	382	127	141	-11.215	1.66043	21.8628	2.92863e-06	3.80609e-05	1.01169e-17	1.37406e-107	1.30831e-15	1.68098e-09	2.00727e-63	0.499317	0.947	2.362	0.377	4.128	0.461	1.524	1.125	2.343	0.38	3.347	1.719	1.957	4	4+
898	CCNE1	52	311	19	186	63	74	40	97	22	121	19	43	-11.9575	1.86874	26.5614	2.55288e-07	4.16033e-06	7.31179e-49	2.79839e-44	0.0243493	1.30027e-07	2.5354e-15	0.00530774	1.265	8.194	0.413	5.182	1.593	2.502	1.176	3.291	0.677	3.471	0.834	1.943	4	4+
55061	SUSD4	33	439	26	31	23	56	36	16	33	168	26	104	-12.0125	1.52728	16.3008	5.40399e-05	0.0005266	5.34919e-96	0.21309	3.02772e-06	0.0374807	1.15544e-19	9.07242e-12	4.087	37.092	3.107	3.693	2.541	6.279	2.413	1.247	2.348	16.609	4.822	10.969	4	4+
909	CD1A	91	315	42	60	27	212	23	61	8	583	27	1052	-11.0868	2.95536	55.1329	1.12648e-13	5.89649e-12	2.44952e-32	0.00397395	2.29613e-47	1.12485e-05	3.72821e-148	3.10751e-272	1.784	6.696	0.734	1.347	0.551	5.775	0.547	1.672	0.199	13.459	0.956	38.317	4	4+
768	CA9	5	288	26	1010	67	20	8	10	12	1517	3	39	-10.9032	3.85836	60.2844	8.20942e-15	5.30202e-13	1.12823e-80	7.28699891379484e-318	0.000243824	1	0	1.2163e-08	0.14	8.716	0.651	32.352	1.945	0.778	0.27	0.389	0.424	50.079	0.151	2.026	4	4+
260436	C4orf7	41	22	0	13	0	22	16	121	0	0	2	17	-13.3739	2.49299	23.8914	1.01928e-06	1.44951e-05	0.0672779	0.000122902	1.70056e-07	8.06211e-23	1	0.00104976	5.559	3.134	0	2.014	0	4.156	2.402	21.516	0	0	0.474	4.243	4	4+
24137	KIF4A	78	276	30	361	22	81	98	235	21	301	38	98	-11.5094	2.29972	40.3859	2.08439e-10	6.12763e-09	1.7372e-29	2.54508e-91	7.69375e-13	2.17463e-16	1.7013e-58	6.69805e-07	0.665	2.558	0.227	3.524	0.196	0.959	1.024	2.817	0.228	3.011	0.587	1.552	4	4+
116372	LYPD1	18	21	5	19	3	23	10	139	2	236	11	37	-12.6497	2.80135	42.0517	8.8891e-11	2.8356e-09	0.569477	0.00169627	7.78946e-06	1.10683e-32	3.09408e-61	0.000390713	1.362	1.733	0.335	1.647	0.239	2.417	0.934	14.874	0.193	20.935	1.513	5.211	4	4+
1917	EEF1A2	10	36	18	26	22	3623	15	284	6	1425	1	61	-10.2938	4.67825	97.309	5.93096e-23	1.4646e-20	0.00019324	0.10987	0	1.64425e-70	0	8.2403e-17	0.23	0.896	0.369	0.684	0.526	115.685	0.417	9.107	0.174	38.594	0.041	2.604	4	4+
56169	GSDMC	27	311	8	173	9	92	13	184	5	250	21	61	-11.8602	3.70346	87.4426	8.67619e-21	1.4806e-18	5.71254e-65	1.06735e-49	6.39122e-23	1.67771e-42	2.20241e-61	2.35165e-05	0.396	4.95	0.104	2.904	0.138	1.873	0.232	3.782	0.093	4.31	0.557	1.662	4	4+
2676	GFRA3	49	742	24	231	50	33	18	208	29	780	13	7	-11.221	2.67301	41.375	1.25655e-10	3.86731e-09	4.84476e-168	4.84207e-54	0.768982	5.68336e-46	1.6826e-174	0.410223	1.034	16.976	0.452	5.584	1.098	0.968	0.461	6.133	0.775	19.396	0.496	0.274	4	4+
9833	MELK	55	148	19	365	19	75	71	230	14	243	44	66	-11.7028	2.32304	38.6007	5.20012e-10	1.42494e-08	7.90888e-12	1.96341e-102	4.99935e-12	1.78246e-23	1.78504e-50	0.0707918	0.889	2.598	0.274	6.76	0.32	1.685	1.397	5.21	0.287	4.624	1.287	1.984	4	4+
64105	CENPK	36	100	20	91	18	37	31	60	17	60	39	78	-12.5349	1.44302	16.4081	5.10652e-05	0.000499701	7.14625e-09	1.5642e-15	0.000988079	0.0013797	1.1076e-05	0.000775738	0.86	2.588	0.427	2.49	0.447	1.228	0.896	2	0.514	1.69	1.682	3.462	4	4+
124989	C17orf57	48	85	56	121	22	49	31	91	39	141	40	153	-12.1345	1.44593	17.2665	3.24866e-05	0.000332145	0.000678572	5.18988e-10	4.09808e-05	9.59276e-09	2.98238e-12	3.27291e-16	0.736	2.018	0.768	2.125	0.425	1.043	1.172	1.952	0.758	2.544	1.108	4.353	4	4+
374618	TEX9	81	110	27	74	18	49	33	38	26	355	44	472	-11.7192	1.83475	24.0706	9.28665e-07	1.33147e-05	0.0189302	2.28821e-08	4.32014e-06	0.448973	1.77622e-67	1.48375e-90	2.438	3.58	0.728	2.551	0.562	2.05	1.195	1.59	0.988	12.617	2.386	26.378	4	4+
147968	CAPN12	86	149	96	166	51	371	84	113	92	433	38	70	-12.0845	1.35033	14.9513	0.000110324	0.000991736	1.28777e-05	1.51209e-09	3.93826e-80	0.0127749	3.74323e-46	0.00487227	1.111	2.099	1.097	2.457	0.692	6.657	1.339	2.064	1.517	6.557	0.892	1.683	4	3+
117854	TRIM6	35	290	82	156	33	29	52	43	25	182	51	197	-12.4823	1.45369	16.0418	6.19588e-05	0.00059249	2.09991e-54	8.26065e-11	0.907078	0.919474	1.02667e-26	8.46624e-21	0.578	5.22	2.017	2.951	0.573	0.665	1.059	1.004	0.582	3.523	1.53	6.053	4	3+
55816	DOK5	59	60	33	44	26	191	50	80	23	177	19	150	-12.779	1.68451	20.5483	5.8146e-06	7.05074e-05	0.823119	0.0494081	4.44404e-42	0.00396196	1.81646e-27	8.27786e-26	1.362	1.501	0.681	1.164	0.625	6.13	1.397	2.578	0.672	4.818	0.792	6.435	4	3+
8537	BCAS1	132	623	82	1802	39	115	23	22	148	105	187	706	-10.8884	1.65853	19.0688	1.26088e-05	0.000141302	1.07136e-82	0	3.28643e-14	1	0.0016708	2.47537e-71	1.485	7.618	0.82	23.222	0.459	1.798	0.316	0.348	2.116	1.389	3.811	14.769	4	3+
332	BIRC5	35	130	29	182	16	66	53	159	23	126	14	23	-12.4577	1.96129	29.312	6.16141e-08	1.11876e-06	3.77129e-15	3.73171e-36	1.64146e-11	2.71179e-15	5.93336e-16	0.240237	0.591	2.396	0.436	3.526	0.505	1.551	1.954	3.791	0.901	2.654	0.432	1.749	4	3+
930	CD19	188	83	3	119	10	76	31	469	2	24	1	30	-12.2668	3.18542	49.0421	2.50524e-12	1.05805e-10	5.93193e-09	9.54478e-37	3.09012e-17	7.7854e-110	2.40728e-05	5.91617e-08	6.741	5.995	0.058	5.24	0.767	6.656	0.828	16.094	0.055	0.611	0.039	1.753	4	3+
79370	BCL2L14	106	161	18	243	19	63	17	43	5	31	16	70	-12.2367	2.0244	28.3851	9.94262e-08	1.73913e-06	0.000217012	1.76273e-63	2.23088e-09	0.000742499	2.94368e-05	7.95455e-09	2.977	4.9	0.453	7.819	0.554	2.461	0.576	1.685	0.313	1.03	0.812	3.672	4	3+
2139	EYA2	125	451	68	975	87	121	39	48	78	307	15	18	-11.1567	1.49689	16.8339	4.07974e-05	0.000409731	4.45938e-48	3.50768e-256	4.16965e-05	0.278342	4.39206e-28	0.840363	3.552	13.907	1.953	32.798	3.624	4.138	1.678	1.466	3.26	6.37	1.977	2.128	4	2+
8190	MIA	6	21	0	15	0	6	0	1	0	107	0	0	-14.3618	4.35307	41.5438	1.15262e-10	3.57892e-09	0.00648706	3.19324e-05	0.0284226	1	2.83238e-29	1	3.672	30.024	0	33.131	0.482	13.707	0	0.433	0	184.326	0	2.135	3	5+
3221	HOXC4	3	95	20	87	12	58	19	32	9	26	11	3	-13.384	1.78368	19.2723	1.13338e-05	0.000128801	3.23792e-26	1.3436e-14	4.62902e-11	0.0728904	0.0285259	0.107562	0.581	3.685	1.028	3.512	0.331	7.391	1.434	4.108	0.302	3.511	0.528	0.148	3	5+
79883	PODNL1	35	59	35	48	37	59	21	109	31	886	5	25	-12.1874	1.87363	23.841	1.04631e-06	1.48092e-05	0.0124103	0.0196056	0.000769403	6.73596e-17	5.2499e-200	0.000520673	0.849	4.22	0.858	5.822	1.658	7.558	1.199	7.843	1.858	60.173	0.22	0.903	3	5+
8318	CDC45	49	125	21	138	23	50	36	58	6	49	25	36	-13.1281	1.55972	18.174	2.01612e-05	0.000216573	1.26924e-09	4.20483e-28	5.38486e-05	0.016824	6.15878e-08	0.26793	1.319	3.703	0.502	4.263	0.653	1.873	1.21	2.255	0.21	2.408	1.245	4.06	3	4+
728963	RPS15AP10	10	63	5	62	17	29	10	22	6	47	2	13	-13.9387	2.27601	30.8514	2.78556e-08	5.42382e-07	3.64163e-11	1.63832e-16	0.0149738	0.0296498	1.83136e-07	0.00958781	0.562	3.803	0.255	3.989	0.98	2.268	0.662	1.694	0.422	3.14	0.201	1.354	3	4+
84057	MND1	11	71	6	24	1	11	9	26	4	33	9	30	-13.9958	2.29638	30.2923	3.71601e-08	7.07155e-07	1.63871e-12	0.000223908	0.00671815	0.00308755	2.64146e-06	0.0017281	0.593	4.115	0.293	1.482	0.055	0.825	0.573	1.924	0.27	2.114	0.869	2.999	3	3+
26576	SRPK3	0	91	9	33	22	104	1	13	8	97	1	10	-13.4918	3.31655	55.7619	8.18023e-14	4.40264e-12	4.2662e-28	1.14172e-05	2.07845e-18	0.00255555	2.20458e-18	0.0141893	0.216	2.35	0.191	0.901	0.547	3.444	0.029	0.436	0.242	2.71	0.043	0.441	3	3+
23532	PRAME	0	445	9	6137	0	41	0	2	0	516	0	0	-10.5805	10.0627	193.167	6.47343e-44	3.55043e-40	2.9149e-136	0	2.15447e-13	1	5.69511e-143	1	0	10.128	0.169	147.56	0	1.196	0	0.059	0	12.763	0	0	3	3+
27198	HCAR1	27	274	41	461	26	15	17	63	14	21	7	113	-12.4716	2.24289	31.4784	2.01674e-08	4.01625e-07	3.62115e-55	1.11557e-113	0.490862	9.20348e-08	0.652066	3.91522e-25	0.36	3.966	0.486	7.035	0.362	0.278	0.276	1.178	0.237	0.329	0.169	2.799	3	3+
342132	ZNF774	35	160	34	157	10	34	18	33	25	60	14	57	-12.9986	1.77167	23.4783	1.26332e-06	1.76663e-05	1.59249e-21	2.03228e-26	2.2901e-05	0.0374807	0.00198257	5.89737e-07	0.797	3.948	0.692	4.095	0.237	1.076	0.496	1.049	0.721	1.611	0.576	2.412	3	3+
25884	CHRDL2	17	69	21	131	13	145	38	407	11	10	4	3	-12.784	2.28666	30.2707	3.75751e-08	7.13757e-07	4.85604e-09	4.53744e-26	5.13553e-37	4.79494e-86	1	1	0.429	1.888	0.474	3.79	0.341	5.091	1.16	14.332	0.351	0.298	0.182	0.141	3	3+
728192	LOC728192	1	42	1	8	0	5	2	2	0	82	5	37	-14.331	3.99121	49.3803	2.10857e-12	9.03243e-11	1.39785e-11	0.0350231	0.0543219	1	7.78938e-24	8.82353e-07	0.054	2.456	0.049	0.498	0	0.379	0.128	0.149	0	5.302	0.487	3.732	3	3+
729966	LOC729966	1	2	3	36	0	38	3	4	0	14	0	33	-14.6535	4.13184	49.3834	2.10518e-12	9.03243e-11	1	1.06057e-09	1.66031e-12	1	0.000258526	5.07067e-10	0.087	0.185	0.24	3.585	0	4.605	0.3	0.469	0	1.459	0	5.31	3	3+
79783	C7orf10	10	40	21	15	13	35	5	24	3	112	0	7	-13.8988	2.13381	24.491	7.46584e-07	1.08825e-05	7.25018e-06	1	0.000206726	0.000902946	6.54736e-27	0.0171406	0.475	2.086	0.903	0.819	0.643	2.319	0.288	1.625	0.185	6.379	0	0.893	3	3+
5307	PITX1	10	105	7	528	5	27	7	139	12	186	2	28	-12.5891	4.11821	92.2105	7.79306e-22	1.55787e-19	4.02041e-22	5.15121e-172	1.5449e-05	2.09125e-34	4.11664e-37	1.60376e-06	0.171	1.945	0.106	10.325	0.089	0.641	0.145	3.323	0.26	3.738	0.062	0.889	3	3+
3206	HOXA10	2	272	10	285	9	71	4	6	4	14	3	5	-13.0219	3.50023	51.6111	6.76586e-13	3.10077e-11	5.09099e-81	2.14351e-85	1.04252e-16	1	0.0511602	1	0.052	7.638	0.232	8.466	0.242	2.56	0.125	0.217	0.131	0.428	0.14	0.241	3	3+
23457	ABCB9	72	281	148	121	70	209	58	68	55	289	12	79	-12.2638	1.45649	16.8225	4.10445e-05	0.000411819	6.88911e-33	0.952121	1.79992e-25	0.262861	4.0552e-34	8.65635e-13	0.933	3.965	1.705	1.796	0.949	3.764	0.919	1.241	0.908	4.409	0.282	1.908	3	3+
5979	RET	34	76	38	203	8	52	31	54	33	135	7	171	-12.8156	2.22038	35.205	2.9676e-09	7.04638e-08	4.74845e-05	1.08735e-36	3.12017e-11	0.0081342	3.73643e-13	3.09076e-41	0.65	1.738	0.392	4.301	0.148	1.125	0.552	0.991	0.622	4.368	0.518	18.092	3	3+
5368	PNOC	26	21	6	55	7	28	22	145	11	71	2	14	-13.5401	2.18888	28.7596	8.19417e-08	1.45512e-06	0.962896	1.17136e-13	1.85203e-05	3.69799e-25	2.13513e-10	0.00558399	0.964	0.84	0.2	2.334	0.268	1.443	0.976	7.442	0.513	3.113	0.133	0.963	3	3+
140469	MYO3B	9	137	2	205	2	6	3	38	3	209	0	29	-13.1285	4.83398	98.3917	3.43297e-23	8.78758e-21	6.71515e-32	1.09157e-66	0.271021	2.3948e-08	2.40445e-52	7.5828e-09	0.557	2.836	0.019	2.474	0.022	0.764	0.039	0.571	0.041	5.609	0	1.555	3	3+
222	ALDH3B2	29	91	16	303	11	24	13	52	13	246	10	664	-12.3003	3.2593	64.3109	1.06258e-15	8.08102e-14	6.0242e-09	6.52808e-86	0.0076719	4.00287e-07	3.48197e-52	1.22275e-180	0.477	1.623	0.234	5.703	0.189	0.548	0.26	1.197	0.271	4.756	0.297	20.275	3	3+
153768	PRELID2	26	144	35	178	18	41	24	20	15	69	16	75	-13.1009	1.78909	23.3916	1.32157e-06	1.84073e-05	2.00149e-22	6.22805e-32	0.000202622	1	3.77178e-08	6.90054e-10	0.554	3.33	0.663	9.956	0.401	1.214	0.62	0.593	0.404	1.729	0.615	2.967	3	3+
157574	FBXO16	14	69	21	62	4	23	13	20	4	34	17	76	-13.7169	2.02368	27.1748	1.85862e-07	3.11104e-06	2.06123e-10	3.28352e-08	3.70669e-05	0.214023	1.49751e-06	1.1506e-09	0.495	2.634	0.667	2.51	0.146	1.131	0.551	0.98	0.178	1.421	1.082	4.987	3	3+
6911	TBX6	7	139	20	102	20	26	28	23	28	89	2	35	-13.3428	1.94659	24.6077	7.02702e-07	1.03217e-05	1.92072e-34	2.17123e-18	0.127754	1	4.91271e-07	2.14296e-08	0.162	3.485	0.413	2.703	0.481	0.836	0.784	0.743	0.82	2.428	0.084	1.504	3	3+
3171	FOXA3	14	93	7	198	8	65	0	6	11	32	5	71	-13.221	3.2591	57.1935	3.94979e-14	2.27764e-12	2.64877e-16	5.46506e-59	7.38691e-15	0.0337555	0.00980787	1.58094e-15	0.284	2.049	0.127	4.608	0.169	1.835	0	0.17	0.283	0.766	0.184	2.681	3	3+
5003	SLC22A18AS	15	26	14	53	7	136	14	33	12	61	0	74	-13.3573	2.56961	40.1409	2.36286e-10	6.87885e-09	0.0681596	1.10692e-08	7.52031e-40	0.00521592	1.0118e-07	3.75152e-22	0.418	0.784	0.349	1.692	0.203	5.271	0.471	1.281	0.423	2.007	0	3.832	3	3+
440107	PLEKHG7	122	299	25	235	16	78	24	41	26	65	30	152	-12.4406	1.90184	27.3817	1.67003e-07	2.80881e-06	3.37303e-20	2.11778e-55	1.33154e-14	0.0396895	0.000639448	3.05751e-20	1.468	3.91	0.267	3.239	0.201	1.304	0.353	0.693	0.398	0.919	0.654	3.401	3	3+
145741	C2CD4A	40	93	3	513	3	15	14	166	13	78	20	154	-12.4415	3.1568	58.7878	1.75625e-14	1.07789e-12	1.27337e-06	3.29832e-167	0.00153564	1.07147e-36	5.54471e-11	3.65466e-26	0.452	1.142	0.03	6.64	0.035	0.235	0.193	2.635	0.187	1.036	0.409	3.236	3	3+
3012	HIST1H2AE	3	7	2	9	7	4	0	21	8	115	1	38	-14.0848	2.79569	32.2401	1.36247e-08	2.83431e-07	0.316889	0.0610061	1	1.7584e-06	4.25999e-23	3.28177e-10	0.372	0.914	0.231	1.275	0.864	0.69	0	3.435	1.209	17.213	0.217	8.677	3	3+
79820	CATSPERB	69	40	14	253	5	85	14	29	15	223	13	405	-12.3949	3.05221	51.3396	7.76941e-13	3.52987e-11	0.0206154	9.31664e-70	1.93118e-23	0.0215395	3.02375e-44	5.50944e-101	0.746	0.47	0.134	3.132	0.057	1.276	0.185	0.44	0.206	2.833	0.255	8.14	3	3+
55065	GPR172B	42	326	33	112	32	199	22	11	20	49	7	25	-12.6341	1.74469	20.8122	5.06592e-06	6.2147e-05	1.00181e-58	2.41548e-15	1.12398e-40	0.274111	0.00297234	0.00323177	0.732	6.202	0.51	2.237	0.585	4.819	0.473	0.272	0.446	1.004	0.222	0.896	3	3+
3226	HOXC10	0	523	1	527	1	356	6	0	0	71	1	3	-12.1058	6.71082	120.345	5.31526e-28	2.32432e-25	2.84486e-160	1.02635e-171	6.38807e-117	0.0632412	7.3559e-21	1	0	11.713	0.018	12.468	0.022	10.219	0.15	0	0	1.728	0.037	0.115	3	3+
389384	C6orf222	12	21	1	338	2	369	1	12	1	274	2	20	-12.4523	5.37883	101.351	7.70359e-24	2.15598e-21	0.178968	3.57704e-110	4.04165e-121	0.00461059	1.39001e-73	0.000188448	0.124	0.237	0.009	4.011	0.022	5.311	0.013	0.175	0.013	3.336	0.038	0.385	3	3+
92312	MEX3A	89	442	74	519	31	353	95	147	31	256	37	75	-11.7389	2.26493	38.9597	4.32637e-10	1.19645e-08	2.54575e-61	4.11892e-107	8.74324e-90	0.00015283	1.71598e-40	0.00081887	0.548	2.962	0.404	3.66	0.2	3.019	0.718	1.275	0.243	1.85	0.413	0.859	3	3+
26575	RGS17	5	40	4	69	0	8	4	94	1	29	1	107	-13.5201	4.54313	86.6967	1.26505e-20	2.10741e-18	1.03157e-07	7.2215e-20	0.00762222	1.09371e-24	1.52281e-07	2.96452e-30	0.15	1.3	0.108	2.374	0	0.334	0.145	3.926	0.038	1.029	0.054	5.97	3	3+
100129480	LOC100129480	14	42	11	29	14	25	3	22	3	48	2	40	-13.8783	2.30391	31.4918	2.00281e-08	3.99231e-07	9.4146e-05	0.000524729	0.0300849	0.00026082	1.14182e-10	9.23692e-10	0.622	2.01	0.441	1.475	0.641	1.544	0.159	1.348	0.167	2.527	0.159	3.296	3	3+
26579	MYEOV	11	96	2	177	3	9	37	884	4	14	3	320	-11.826	4.3047	87.683	7.68334e-21	1.34394e-18	4.99428e-19	1.0489e-57	0.03992	1.53189e-229	0.0511602	6.72154e-90	0.195	1.847	0.032	3.594	0.055	0.222	0.797	21.939	0.09	0.292	0.096	10.544	3	3+
6913	TBX15	23	277	59	126	28	12	19	74	22	231	10	112	-12.2778	2.17645	32.0818	1.47819e-08	3.04487e-07	3.2743e-59	1.24136e-10	0.171215	7.66713e-10	4.39623e-40	2.20072e-22	0.256	3.348	0.583	1.605	0.326	0.185	0.258	1.156	0.311	3.019	0.201	2.316	3	3+
140578	CHODL	24	142	23	111	12	8	10	13	6	177	14	8	-12.8722	1.63597	15.7501	7.22835e-05	0.000680067	2.86677e-22	1.2578e-19	1	0.473791	4.02901e-40	0.442358	0.52	3.364	0.444	2.76	0.273	0.32	0.266	0.4	0.167	4.532	0.555	0.325	3	3+
23120	ATP10B	43	695	6	959	2	274	7	95	3	270	3	267	-11.306	5.70241	168.549	1.53464e-38	2.30087e-35	1.4298e-160	1.22196660108065e-312	6.29456e-90	6.34611e-22	1.81147e-69	3.01585e-74	0.212	3.73	0.026	5.415	0.01	1.876	0.042	0.66	0.019	1.562	0.027	2.448	3	3+
84290	CAPNS2	2	49	1	190	2	2	4	3	5	8	3	143	-13.1575	3.57035	44.223	2.93019e-11	1.00334e-09	1.72842e-12	6.72694e-62	1	1	0.747416	6.11408e-38	0.094	2.478	0.042	10.218	0.097	0.131	0.223	0.194	0.295	0.446	0.253	12.457	3	3+
91703	ACY3	16	81	0	113	5	22	9	20	7	22	1	46	-13.3437	2.9021	45.0863	1.88535e-11	6.63985e-10	2.30931e-12	9.33061e-37	0.000236347	0.0347459	0.0144362	1.73546e-12	0.552	3.019	0	4.465	0.179	1.055	0.372	0.957	0.304	0.897	0.062	2.947	3	3+
51127	TRIM17	18	92	6	27	8	55	17	4	15	158	2	3	-13.1746	1.9208	19.9868	7.79772e-06	9.17456e-05	7.41161e-14	4.62979e-05	5.33383e-12	0.0165777	7.97885e-28	1	0.72	4.029	0.23	1.239	0.424	3.062	0.838	0.383	0.773	7.473	0.162	0.225	3	3+
10388	SYCP2	92	1657	78	686	81	165	124	74	62	456	109	34	-10.9848	1.62386	16.474	4.93219e-05	0.000485129	0	2.15065e-155	5.98277e-13	0.0101451	5.73338e-67	9.95708e-10	0.634	12.434	0.477	5.419	0.585	1.581	1.049	0.719	0.544	3.692	1.363	0.436	3	3+
4166	CHST6	286	198	105	471	42	89	58	105	110	412	32	942	-11.2234	1.69241	20.8208	5.04315e-06	6.19401e-05	0.0018782	1.25121e-75	5.69002e-08	7.05309e-05	1.61396e-35	5.40356e-234	1.558	1.174	0.507	2.94	0.24	0.674	0.388	0.806	0.763	2.635	0.316	9.547	3	3+
8437	RASAL1	54	357	8	183	3	210	7	41	4	124	4	64	-12.3458	4.04561	95.0635	1.84378e-22	4.11711e-20	9.32601e-59	6.78063e-53	6.18771e-69	2.27485e-07	6.1712e-29	1.6977e-14	0.614	4.431	0.08	2.384	0.336	3.896	0.099	0.662	1.003	1.928	0.083	1.355	3	3+
7429	VIL1	11	874	3	2947	11	672	2	8	5	24	2	2	-10.8856	5.6933	103.395	2.74528e-24	8.47403e-22	2.79713e-253	0	3.95557e-221	0.123026	0.0010915	1	0.159	13.754	0.039	48.915	0.166	13.53	0.035	0.163	0.092	0.409	0.052	0.054	3	3+
55388	MCM10	40	103	10	146	7	34	32	84	14	74	31	41	-12.8877	1.90905	25.9059	3.58481e-07	5.64903e-06	3.06517e-08	5.84921e-39	6.87251e-07	3.34898e-07	1.25023e-09	0.381391	0.338	2.597	0.075	1.416	0.246	0.99	0.588	2.341	0.151	2.487	0.477	0.646	3	3+
10595	ERN2	78	652	36	131	23	632	20	16	20	87	3	753	-11.5066	3.06365	55.6735	8.55656e-14	4.58169e-12	8.34141e-121	5.42702e-19	7.79686e-194	1	2.93136e-09	4.2224e-219	0.836	7.597	0.343	1.608	0.258	9.411	0.262	0.241	0.273	1.096	0.058	15.008	3	3+
50617	ATP6V0A4	40	465	16	2207	25	394	8	9	9	39	13	6	-11.2304	2.92736	42.4061	7.41602e-11	2.3948e-09	2.34172e-98	0	3.2761e-109	1	0.000133879	0.275646	0.551	6.958	0.196	34.825	0.36	7.541	0.134	0.199	0.157	0.632	0.324	0.272	3	3+
84824	FCRLA	72	59	5	89	3	26	12	177	1	16	6	38	-12.9874	2.83141	41.3543	1.26989e-10	3.90265e-09	0.636648	1.03412e-24	1.25136e-06	1.58272e-41	0.000564374	1.86731e-06	2.339	2.053	0.148	3.309	0.1	1.175	0.456	7.838	0.04	1.005	0.348	2.286	3	3+
25837	RAB26	25	60	21	53	18	149	14	27	2	70	3	51	-13.0094	2.43459	38.1143	6.67205e-10	1.79547e-08	0.000101383	1.01781e-05	1.00007e-34	0.0413414	1.92744e-16	7.45715e-12	0.658	1.71	0.495	1.598	0.492	5.454	0.445	0.991	0.067	2.175	0.143	2.495	3	3+
1800	DPEP1	66	30	19	152	7	184	102	192	6	56	0	11	-12.4946	2.30548	29.1434	6.72146e-08	1.21176e-06	0.00124811	1.71206e-33	7.5476e-57	4.7863e-09	1.26776e-09	0.00126313	1.835	1.067	0.473	4.839	0.202	7.109	3.418	7.429	0.211	1.837	0	0.568	3	3+
342897	NCCRP1	51	43	5	202	4	145	8	33	7	443	11	26	-12.3244	3.2523	53.161	3.07296e-13	1.50003e-11	0.776553	9.37442e-64	1.74051e-45	4.87149e-05	1.36172e-111	0.0291942	1.081	0.988	0.095	4.903	0.088	4.27	0.206	0.977	0.188	11.061	0.421	1.024	3	3+
26256	CABYR	0	21	1	18	2	11	1	2	2	1	1	1	-15.0991	2.75109	18.5883	1.62216e-05	0.000177802	1.06465e-06	4.34994e-05	0.00370876	1	1	1	0	9.437	0.542	9.299	0.77	7.05	0.399	1.08	1.057	0.648	0.879	0.881	3	3+
6491	STIL	114	421	61	742	40	184	85	141	31	269	79	109	-11.4798	2.03082	31.6062	1.88829e-08	3.77839e-07	1.63653e-45	6.26798e-187	1.30183e-31	2.61758e-05	8.23241e-43	0.0573722	0.871	3.509	0.623	6.497	0.321	1.953	1.153	1.631	0.303	2.412	1.098	1.552	3	3+
55359	STYK1	62	267	29	375	32	83	27	94	34	161	49	81	-12.0445	2.01233	31.3677	2.135e-08	4.2317e-07	1.38971e-33	1.43033e-96	1.57054e-09	1.02121e-10	8.89613e-18	0.0112963	0.812	3.801	0.338	5.629	0.438	1.511	0.432	1.729	0.566	2.481	1.163	1.973	3	3+
57156	TMEM63C	36	178	9	82	24	330	11	124	14	660	4	198	-11.7894	3.96523	99.52	1.94192e-23	5.09511e-21	2.81645e-25	8.8427e-20	8.98156e-88	1.09497e-27	1.45395e-160	1.42229e-52	0.251	1.352	0.056	0.656	0.175	3.2	0.094	1.219	0.124	5.409	0.051	2.571	3	3+
4608	MYBPH	38	1	4	1	1	38	33	1088	14	142	20	89	-11.9176	2.33139	23.8415	1.04605e-06	1.48092e-05	3.77185e-10	0.503245	1.66031e-12	3.36296e-297	1.81174e-24	4.01555e-11	0.893	0.025	0.084	0.027	0.024	1.241	0.938	35.674	0.416	3.934	0.849	3.885	3	3+
83715	ESPN	151	669	45	148	32	381	44	113	38	614	5	31	-11.482	2.59825	49.1426	2.38017e-12	1.01133e-10	8.41474e-85	1.60966e-19	1.82947e-98	3.4836e-09	6.26077e-123	2.32963e-05	1.669	8.041	0.442	1.875	0.37	5.853	0.595	1.756	0.534	7.98	0.1	0.637	3	3+
3227	HOXC11	1	138	0	171	0	80	0	0	0	28	0	0	-13.1505	8.56282	116.52	3.65653e-27	1.50491e-24	1.97322e-42	1.31214e-55	3.59609e-26	1	2.05179e-08	1	0.02	2.951	0	3.862	0	2.192	0	0	0	0.65	0	0	3	3+
3219	HOXB9	0	135	3	1058	4	695	3	4	0	97	1	0	-11.5851	7.14868	133.756	6.17758e-31	4.05211e-28	3.10427e-41	0	1.23259e-228	1	2.43382e-26	1	0	2.166	0.039	17.906	0.062	14.269	0.054	0.083	0	1.686	0.027	0	3	3+
642587	LOC642587	10	134	3	16	0	11	3	3	5	191	2	146	-12.9245	4.03917	68.0216	1.61716e-16	1.48228e-14	3.61506e-30	0.000767879	0.000538063	1	4.05977e-45	3.35945e-40	0.576	8.279	0.157	1.054	0	0.881	0.203	0.236	0.36	13.069	0.206	15.571	3	3+
7031	TFF1	0	2	2	172	0	2	1	7	6	26	0	16	-13.94	4.26647	45.4459	1.5691e-11	5.68834e-10	1	6.58491e-56	1	0.0774022	0.00107031	4.63036e-05	0	0.321	0.29	30.154	0	0.428	0.168	1.396	1.112	4.854	0	4.514	3	3+
347475	CCDC160	17	88	3	62	2	1	2	20	10	6	4	90	-13.675	2.53171	29.7494	4.91649e-08	9.1568e-07	1.88389e-13	8.16899e-19	1	0.00019857	0.454463	1.17194e-21	0.597	3.337	0.095	2.493	0.073	0.049	0.084	0.974	0.442	0.249	0.253	5.866	3	3+
150590	C2orf15	17	114	22	120	24	31	19	25	14	49	31	100	-13.0567	1.64146	19.7834	8.67313e-06	0.000101406	1.31841e-19	1.15925e-22	0.131534	0.373669	8.30024e-05	3.14604e-09	0.529	3.838	0.614	4.279	0.775	1.342	0.711	1.081	0.55	1.802	1.739	5.781	3	3+
2877	GPX2	21	87	15	4581	18	74	6	2	15	7	2	4	-10.9123	1.8901	15.685	7.48169e-05	0.000700762	2.34271e-11	0	2.62289e-12	0.448973	0.14293	1	1.008	4.492	0.65	251.613	0.889	4.937	0.341	0.132	0.902	0.398	0.172	0.356	3	3+
83959	SLC4A11	154	187	89	960	97	79	111	1935	82	47	12	233	-11.1047	1.86988	20.3754	6.3643e-06	7.62916e-05	0.0324396	5.06017e-232	0.973612	0	0.000594041	1.93272e-53	2.054	2.71	1.056	14.671	2.033	1.464	2.237	39.712	1.39	0.884	0.29	5.78	3	3+
123745	PLA2G4E	40	58	40	205	12	191	43	456	67	600	15	55	-11.9098	2.61987	48.3937	3.48688e-12	1.42116e-10	0.06864	8.22879e-37	1.17339e-53	2.35703e-96	2.796e-96	3.50417e-06	0.318	0.502	0.283	1.869	0.1	2.112	0.42	5.11	0.679	5.61	0.217	0.814	3	3+
140766	ADAMTS14	178	63	27	95	17	173	55	262	13	451	12	39	-12.1618	2.25529	31.2224	2.30095e-08	4.5392e-07	5.81608e-12	1.09632e-13	1.07737e-42	2.61871e-37	3.58258e-105	0.000352799	1.293	0.508	0.174	0.791	0.13	2.365	0.493	2.694	0.121	3.845	0.159	0.528	3	3+
64220	STRA6	4	4	2	32	0	21	0	8	0	9	0	1	-15.0008	3.6948	33.6795	6.49825e-09	1.4449e-07	1	2.73709e-09	3.34117e-07	0.00936732	0.0071841	1	0.865	0.869	0.402	7.903	0	6.41	0.035	1.98	0	2.332	0	0.375	3	3+
137209	ZNF572	18	161	65	407	33	29	40	44	24	256	27	51	-12.3434	1.75625	21.9498	2.79875e-06	3.65334e-05	5.55576e-31	5.12972e-80	0.907078	0.574821	4.73069e-45	0.0146054	0.216	2.099	0.693	5.593	0.414	0.483	0.586	0.741	0.366	3.61	0.587	1.138	3	3+
55203	LGI2	172	275	65	1858	50	239	122	355	41	425	86	38	-11.1722	1.97325	25.8984	3.59864e-07	5.66658e-06	8.70262e-08	0	3.56523e-42	6.10115e-32	2.45046e-73	5.83863e-05	1.021	1.778	0.342	12.64	0.311	1.972	0.889	2.971	0.31	2.963	0.927	0.42	3	3+
245	ALOX12P2	30	194	9	12	26	74	20	31	23	159	18	154	-12.7752	1.98408	27.8516	1.30989e-07	2.24812e-06	2.65449e-32	0.392744	2.10785e-09	0.13113	3.35619e-23	1.86499e-27	0.433	3.042	0.116	0.198	0.392	1.485	0.352	0.628	0.422	2.701	0.47	4.134	3	3+
55897	MESP1	2	83	15	6	13	62	6	18	9	68	1	16	-13.6948	2.34884	29.5539	5.43834e-08	1.00396e-06	1.85395e-22	0.268471	1.93424e-11	0.0318341	9.15717e-11	0.000398465	0.079	3.541	0.534	0.272	0.531	3.409	0.283	0.984	0.448	3.183	0.071	1.174	3	3+
28983	TMPRSS11E	5	864	3	70	2	2	12	166	2	73	2	220	-11.6521	5.20138	114.372	1.08031e-26	4.19921e-24	1.78672e-262	1.91905e-21	1	1.69528e-38	2.79454e-17	5.54021e-62	0.097	18.12	0.052	1.55	0.04	0.054	0.282	4.489	0.049	1.663	0.07	7.906	3	3+
56164	STK31	18	229	18	258	40	111	20	59	31	158	26	33	-12.0025	2.24953	36.0516	1.92158e-09	4.72294e-08	2.66217e-50	5.31975e-68	7.79593e-13	6.23187e-06	2.09214e-18	0.546603	0.225	3.104	0.2	3.686	0.521	1.924	0.305	1.033	0.491	2.317	0.587	0.765	3	3+
440603	BCL2L15	81	497	33	432	18	151	24	54	16	310	30	82	-11.4565	2.76334	54.6169	1.46471e-13	7.48037e-12	1.04757e-78	7.6327e-111	2.90284e-35	0.000302585	3.31712e-65	2.16198e-06	0.619	4.133	0.224	3.782	0.144	1.603	0.225	0.581	0.156	2.783	0.416	1.166	3	3+
162387	MFSD6L	17	362	35	234	16	184	17	9	33	33	7	10	-12.0474	1.94906	21.3141	3.89849e-06	4.91763e-05	8.80715e-89	6.41249e-48	5.52006e-47	0.499997	0.797527	0.691253	0.309	7.128	0.566	4.864	0.303	4.64	0.375	0.229	0.759	0.705	0.23	0.337	3	3+
148113	CILP2	36	97	16	111	13	216	37	213	8	1173	2	6	-11.347	3.35475	63.5173	1.58969e-15	1.15459e-13	2.39695e-08	1.64356e-23	3.36879e-60	1.40291e-34	0	0.293239	0.33	0.968	0.13	1.167	0.125	2.753	0.416	2.749	0.093	12.645	0.033	0.102	3	3+
8538	BARX2	20	761	20	392	9	154	8	53	10	41	3	13	-11.6087	3.69183	75.8219	3.10444e-18	3.62012e-16	4.05167e-205	3.94095e-111	8.1392e-43	6.39773e-10	0.000124284	0.0270414	0.482	19.877	0.431	10.826	0.226	5.161	0.233	1.783	0.305	1.166	0.131	0.582	3	3+
8838	WISP3	0	61	1	34	0	41	0	1	0	8	0	2	-13.914	7.23901	74.4588	6.19179e-18	7.02517e-16	7.40078e-19	2.00607e-11	2.15447e-13	1	0.013897	1	0	2.654	0.036	2.965	0	2.3	0	0.056	0	0.506	0	0.15	3	3+
93273	LEMD1	11	46	1	3	4	24	0	11	6	24	5	6	-13.9612	2.06125	19.1484	1.20942e-05	0.000136482	1.00995e-06	1	2.09461e-05	0.00132673	0.00275447	1	0.988	4.78	0.079	0.896	0.394	5.865	0.766	1.577	0.763	2.801	0.897	1.075	3	3+
9071	CLDN10	8	88	4	347	8	4	17	15	4	0	11	599	-11.9023	2.73719	29.7366	4.94916e-08	9.20947e-07	3.24572e-19	7.13257e-113	0.986584	1	0.0983488	4.07752e-160	1.286	5.277	0.195	24.466	0.811	0.715	1.746	1.474	0.281	0	1.169	61.308	3	3+
9028	RHBDL1	15	66	30	21	44	178	25	33	15	221	2	14	-12.4116	1.77362	20.4188	6.22163e-06	7.49844e-05	2.84615e-09	0.97442	1.45473e-28	0.317449	1.03052e-43	0.00558399	0.42	2.001	0.752	0.674	1.279	6.931	0.844	1.287	0.531	7.307	0.101	0.728	3	3+
3868	KRT16	13	12	2	124	0	97	0	11	0	166	2	20	-12.8074	4.68769	78.4019	8.40697e-19	1.06947e-16	1	2.40233e-40	7.74152e-32	0.00132673	4.05157e-46	0.000188448	0.325	0.324	0.045	3.548	0	3.367	0	0.382	0	4.877	0.09	0.925	3	3+
168667	BMPER	296	102	1239	59	843	247	527	55	675	19	414	26	-11.0431	-3.26834	73.9419	8.0449e-18	8.98205e-16	3.68729e-20	3.41369e-228	6.0744e-45	9.24701e-87	3.63239e-186	9.50195e-90	3.411	1.278	12.693	0.779	10.156	3.955	7.421	0.89	9.886	0.257	8.642	0.557	6	6-
9452	ITM2A	635	245	1185	491	619	201	1189	410	893	159	1141	267	-10.5414	-1.68243	24.8742	6.11962e-07	9.08422e-06	5.53234e-35	1.05394e-34	2.37387e-28	8.97047e-71	2.64405e-138	7.51744e-126	56.318	17.401	92.467	43.09	62.44	21.2	107.748	39.131	83.537	14.291	101.746	22.479	6	6-
11095	ADAMTS8	1707	502	2416	259	2669	298	1727	199	1550	31	973	83	-10.0288	-3.27669	80.3469	3.14126e-19	4.2266e-17	1.97217e-136	0	0	3.06765e-270	0	1.95897e-190	18.052	5.772	22.706	3.138	29.522	4.379	22.337	2.958	20.842	0.385	18.647	1.632	6	6-
3316	HSPB2	78	31	334	44	285	30	187	47	181	68	78	8	-12.2321	-2.28924	40.78	1.70367e-10	5.10128e-09	3.97806e-05	1.21881e-41	4.20042e-39	2.99085e-17	8.94964e-15	8.40032e-15	4.853	2.06	18.72	3.129	18.176	2.592	13.657	3.961	13.935	4.993	8.593	0.914	6	6-
79812	MMRN2	2423	802	4784	921	4469	703	4082	1066	2604	655	1207	210	-9.37264	-2.14057	40.3071	2.17021e-10	6.35325e-09	1.91338e-165	0	0	0	9.34765608219473e-312	1.02601e-166	22.252	8.011	39.023	9.69	42.954	8.97	45.903	13.773	30.423	7.068	20.096	3.587	6	6-
2273	FHL1	6239	1908	14915	1663	8839	739	5451	573	6263	809	5563	531	-8.56806	-2.97449	71.9304	2.22921e-17	2.35131e-15	0	0	0	0	0	0	150.412	49.495	324.775	45.891	219.167	24.772	155.771	19.012	189.381	23.137	240.518	23.742	6	6-
9068	ANGPTL1	608	165	1244	189	574	73	461	50	448	149	339	41	-11.0795	-2.52003	52.4567	4.39842e-13	2.06539e-11	5.44566e-54	1.85854e-138	2.01241e-69	1.02452e-74	2.2935e-41	2.47386e-58	6.673	1.969	12.135	2.376	6.588	1.113	6.186	0.771	6.251	1.922	6.741	0.837	6	6-
80761	UPK3B	1052	218	2842	70	2994	102	1965	91	4345	33	390	23	-9.89966	-4.58367	134.677	3.88558e-31	2.63092e-28	2.22228e-119	0	0	0	0	6.02422e-86	40.113	9.115	146.011	3.064	119.511	5.418	92.277	8.962	221.827	1.495	32.43	1.809	6	6-
80760	ITIH5	685	211	1106	245	578	160	605	152	725	108	311	63	-10.9484	-2.08052	37.1027	1.12071e-09	2.89601e-08	4.58508e-52	5.75439e-89	8.80297e-34	1.65683e-54	4.28112e-125	1.68569e-39	22.254	7.408	32.228	9.114	19.45	7.226	23.605	6.855	29.704	4.145	18.195	3.799	6	6-
57513	CASKIN2	1529	623	3058	689	4035	448	2098	679	3094	486	586	115	-9.68884	-2.1682	40.1055	2.40608e-10	6.99497e-09	5.58044e-75	6.4151e-240	0	3.89737e-136	0	6.41416e-75	20.188	9.758	34.253	14.958	42.651	8.39	35.361	11.231	40.71	8.13	15.414	2.29	6	6-
79825	CCDC48	354	143	1363	109	1220	87	912	54	932	55	330	52	-10.8229	-3.24089	77.7585	1.16444e-18	1.41281e-16	2.01467e-18	1.29903e-213	1.22184e-192	2.45294e-182	5.11455e-223	1.8224e-49	5.274	2.313	18.078	1.86	18.973	1.801	16.556	1.128	17.625	0.964	8.898	1.44	6	6-
83888	FGFBP2	54	2	113	8	301	3	163	7	212	8	91	9	-12.577	-4.51179	114.199	1.17847e-26	4.49746e-24	1.30198e-13	1.34457e-19	1.47657e-67	4.88029e-35	2.79345e-56	2.02115e-17	2.126	0.085	4.003	0.361	12.24	0.164	7.665	0.381	10.501	0.373	6.44	0.658	6	6-
91663	MYADM	20033	5208	13498	2769	13989	2843	8797	1823	17226	4109	6847	1818	-7.95289	-2.08907	38.9162	4.4239e-10	1.2186e-08	0	0	0	0	0	0	262.97	74.279	201.578	41.639	191.85	51.857	140.93	33.589	287.24	63.436	162.76	44.374	6	6-
2701	GJA4	552	173	1062	155	1013	175	599	185	323	150	169	27	-11.0253	-2.02133	34.9014	3.46834e-09	8.15234e-08	2.07953e-41	8.21706e-122	2.56823e-98	4.6909e-42	5.89735e-19	2.01051e-25	13.841	4.697	23.806	4.451	26.397	6.098	18.149	6.466	10.241	4.435	7.646	1.257	6	6-
51162	EGFL7	1058	466	3491	420	5156	453	2493	581	2439	448	557	107	-9.6758	-2.41	48.5454	3.22726e-12	1.3179e-10	6.34e-45	0	0	8.90622e-239	0	2.55211e-72	29.07	13.838	85.206	13.213	147.585	17.292	83.498	22.309	84.442	14.414	27.477	5.422	6	6-
7056	THBD	8384	1033	6281	635	6127	1278	4967	687	8064	938	2507	734	-8.81867	-2.683	59.3229	1.33812e-14	8.4093e-13	0	0	0	0	0	2.45192e-220	79.995	10.72	53.237	6.941	61.174	16.943	58.012	9.22	97.869	10.517	43.361	13.026	6	6-
55282	LRRC36	289	109	1225	72	541	141	748	83	787	377	486	98	-10.947	-2.26545	41.5162	1.16898e-10	3.62435e-09	5.03039e-17	7.19536e-214	1.03166e-34	1.04988e-119	7.13086e-42	6.95222e-61	5.997	2.452	22.688	1.711	11.689	4.066	18.823	2.407	20.686	9.217	18.222	3.779	6	6-
147372	CCBE1	610	110	2400	156	1161	61	1016	329	928	17	758	46	-10.5205	-3.58947	89.4074	3.21338e-21	5.96893e-19	1.10164e-77	0	8.42497e-203	2.02624e-66	1.22339e-267	4.36383e-164	3.66	0.719	12.773	1.072	7.301	0.508	7.484	2.782	7.092	0.12	8.253	0.513	6	6-
55600	ITLN1	304	18	5535	31	16572	128	344	34	6525	2	4081	9	-9.03359	-6.76862	215.525	8.55957e-49	1.79665e-44	7.34414e-64	0	0	1.24582e-57	0	0	11.71	0.748	191.615	1.367	659.564	6.853	15.839	1.811	316.094	0.091	282.435	0.643	6	6-
2219	FCN1	614	87	590	104	1858	619	918	323	1297	140	301	68	-10.6133	-2.24518	41.2842	1.3163e-10	4.03344e-09	1.15148e-90	2.08478e-59	8.54445e-79	6.66095e-53	4.04888e-257	4.15907e-35	21.28	3.256	18.351	4.127	66.644	29.82	38.148	15.515	56.624	5.734	18.768	4.373	6	6-
4653	MYOC	276	25	344	8	331	8	161	2	118	9	86	6	-12.2299	-4.53412	122.664	1.65192e-28	8.66842e-26	8.55145e-51	2.50119e-73	1.01352e-67	2.08869e-41	1.28774e-26	1.93525e-18	5.561	0.546	6.184	0.185	6.945	0.224	3.936	0.056	3.012	0.214	3.131	0.225	6	6-
2819	GPD1	253	80	1126	69	968	204	401	29	831	208	244	42	-11.0536	-2.64818	55.4593	9.54147e-14	5.08313e-12	3.18917e-19	6.89305e-194	7.53029e-78	2.01203e-75	1.04233e-100	8.21033e-35	3.457	1.188	13.692	1.08	13.816	3.874	6.684	0.556	14.422	3.343	6.037	1.067	6	6-
7122	CLDN5	2326	230	5306	248	4914	225	5183	447	5703	191	353	73	-9.3208	-3.78833	104.543	1.53831e-24	4.96757e-22	0	0	0	0	0	2.22765e-43	65.863	7.056	134.995	8.046	144.229	8.862	176.758	17.671	204.674	6.406	18.086	3.853	6	6-
7538	ZFP36	27999	10216	26530	4600	23957	4631	7290	1643	20493	2133	9957	1110	-7.60198	-2.44119	49.8938	1.62295e-12	7.08226e-11	0	0	0	0	0	0	685.234	270.793	580.409	128.934	609.466	157.523	215.69	56.074	634.395	61.559	439.836	50.464	6	6-
10365	KLF2	2249	416	5620	538	2930	399	1193	421	2688	367	799	272	-9.66326	-2.40317	47.8358	4.63462e-12	1.84244e-10	8.25952e-278	0	0	3.04852e-68	0	7.74967e-59	58.626	11.74	131.049	16.061	79.339	14.457	37.547	15.29	88.58	11.286	37.577	13.17	6	6-
6943	TCF21	674	231	2722	381	1988	160	1232	304	1351	30	319	41	-10.3034	-2.93553	64.698	8.73043e-16	6.83775e-14	1.18681e-44	0	9.69881e-300	1.22626e-111	0	2.3306e-53	44.007	16.152	161.66	28.466	132.527	14.532	94.066	27.05	109.908	2.332	51.879	4.956	6	6-
150094	SIK1	11873	4420	7750	1319	11099	1320	8651	1411	5366	1298	4384	626	-8.55732	-2.38217	48.8229	2.80145e-12	1.16441e-10	0	0	0	0	0	0	96.469	39.074	55.904	12.278	94.426	14.901	86.143	16.138	55.486	12.389	64.596	9.461	6	6-
9625	AATK	477	198	1694	111	1822	355	1016	173	1473	72	204	35	-10.6115	-2.76613	58.4553	2.07968e-14	1.25078e-12	2.37645e-23	2.4022e-285	5.63068e-158	1.75002e-126	0	2.87509e-29	3.401	1.536	10.714	0.907	13.609	3.516	8.886	1.737	13.366	0.603	2.637	0.464	6	6-
160622	GRASP	1638	218	808	139	2701	133	1045	209	1282	163	363	61	-10.4734	-2.90018	67.3139	2.31538e-16	2.04201e-14	4.09637e-249	2.37092e-82	0	3.26943e-115	4.38159e-237	2.82496e-52	35.186	5.076	15.496	3.42	60.392	3.971	27.206	6.272	34.873	4.126	14.086	2.435	6	6-
79845	RNF122	2510	374	1078	375	1612	257	1054	309	577	217	750	123	-10.4205	-2.07569	36.9877	1.18877e-09	3.0504e-08	0	3.21435e-46	8.94363e-166	2.34456e-78	1.96974e-45	5.03569e-108	56.69	9.154	21.747	9.701	37.878	8.067	28.824	9.743	16.496	5.777	30.591	5.161	6	6-
22918	CD93	12074	2457	14538	3462	10715	3481	20656	4144	12616	3788	7575	1638	-8.06738	-2.00293	35.5914	2.43362e-09	5.9054e-08	0	0	0	0	0	0	67.653	14.989	72.243	22.225	62.936	27.098	142.145	32.733	90.049	24.918	77.027	17.076	6	6-
10763	NES	2728	795	2943	939	6668	746	5019	963	2932	719	2150	234	-9.35383	-2.32355	45.9373	1.22098e-11	4.53599e-10	2.04069e-219	2.96524e-144	0	0	0	0	18.476	5.861	17.686	7.286	47.316	7.02	41.707	9.188	25.285	5.719	26.417	2.948	6	6-
3569	IL6	6277	72	338	67	2050	72	1444	106	1549	151	3448	86	-9.89247	-4.29213	121.073	3.68344e-28	1.71812e-25	0	4.86525e-31	0	1.57964e-270	5.70003535607046e-320	0	243.712	3.016	11.803	2.978	82.214	3.887	66.983	5.693	75.67	6.937	240.644	6.195	6	6-
55924	C1orf183	568	149	770	168	622	107	791	154	571	152	285	60	-11.1627	-2.15597	40.2632	2.21946e-10	6.47935e-09	1.74349e-52	2.22342e-63	6.11989e-61	2.09594e-89	1.4977e-65	3.26672e-35	3.739	1.75	4.525	1.267	5.132	1.272	6.389	1.428	6.234	1.61	3.471	0.735	6	6-
140706	C20orf160	215	53	753	69	887	65	726	126	596	76	168	20	-11.3208	-2.92788	67.3224	2.30549e-16	2.04187e-14	1.42895e-21	4.37583e-112	1.87256e-139	1.17902e-89	1.72211e-110	2.17077e-29	3.428	0.918	10.695	1.26	14.758	1.44	14.095	2.816	12.06	1.426	4.847	0.593	6	6-
10894	LYVE1	1447	240	5047	213	2185	115	3134	396	1307	325	947	79	-9.90694	-3.28377	83.4705	6.46741e-20	9.55992e-18	6.1014e-193	0	0	0	3.40032e-158	9.67591e-187	23.217	4.181	72.133	3.915	36.58	2.564	61.22	8.904	26.61	6.137	27.493	2.356	6	6-
51751	HIGD1B	105	34	454	55	278	17	174	25	205	26	76	19	-12.2597	-2.70752	55.0471	1.17674e-13	6.14422e-12	4.04236e-08	7.1567e-59	3.28865e-47	1.26605e-24	6.34058e-39	1.20803e-08	10.004	3.432	39.619	5.985	26.742	2.251	18.956	3.176	23.94	2.954	12.736	3.323	6	6-
266727	MDGA1	537	145	971	64	858	192	700	279	1096	444	506	88	-10.872	-2.12071	37.4682	9.29132e-10	2.44086e-08	5.85139e-48	5.66934e-163	9.80432e-65	9.68392e-33	1.85194e-76	2.6371e-70	2.24	0.659	3.59	0.306	3.754	1.113	3.591	1.642	5.827	2.174	3.832	0.683	6	6-
387763	C11orf96	5644	747	1821	378	3484	646	1875	529	3655	435	2611	317	-9.5461	-2.55223	54.099	1.90637e-13	9.57289e-12	0	5.25066e-156	5.10350643395080e-315	4.51293e-146	0	0	186.898	26.727	54.102	14.333	119.469	29.737	74.529	24.309	152.605	17.022	155.674	19.486	6	6-
9510	ADAMTS1	23027	3537	8999	2512	14855	2837	13163	1934	6897	2198	7901	609	-8.16093	-2.45906	50.64	1.10958e-12	4.93433e-11	0	0	0	0	0	0	188.627	31.523	65.447	23.575	127.412	32.289	132.138	22.3	71.9	21.151	117.368	9.28	6	6-
10974	C10orf116	352	75	1187	203	1682	119	566	41	658	85	146	19	-11.0079	-3.00399	70.5648	4.45398e-17	4.51638e-15	8.8922e-40	3.49468e-121	7.29327e-267	2.49269e-106	1.7743e-121	1.41144e-24	32.137	7.255	98.796	21.166	155.47	15.091	59.292	4.988	73.529	9.217	23.401	3.176	6	6-
8639	AOC3	8617	2836	22775	2712	15618	2205	12782	2442	11693	1397	5694	635	-8.15039	-2.64651	58.417	2.12052e-14	1.26808e-12	0	0	0	0	0	0	83.374	29.799	195.283	30.047	158.212	29.619	151.944	33.253	143.634	15.832	99.615	11.389	6	6-
256949	KANK3	601	119	1736	184	1642	63	934	193	1249	71	255	39	-10.6855	-3.1776	76.4643	2.24234e-18	2.65914e-16	4.80131e-71	1.13943e-239	0	2.42214e-100	2.90932e-301	5.02306e-39	8.563	1.842	22.017	3.003	24.431	1.247	16.226	3.858	22.597	1.19	6.577	1.033	6	6-
375033	PEAR1	736	204	2285	291	1638	272	1356	279	1095	211	460	98	-10.4547	-2.34325	47.1452	6.59172e-12	2.52944e-10	2.17676e-63	6.03687e-285	2.13204e-163	1.25176e-145	2.96477e-161	3.10984e-55	5.772	1.741	15.906	2.614	13.452	2.964	13.035	3.08	10.929	1.944	6.542	1.43	6	6-
4499	MT1M	331	39	116	43	634	26	82	8	365	11	32	9	-12.1153	-3.20578	65.5972	5.53171e-16	4.48303e-14	2.84151e-54	2.49068e-05	7.90781e-118	2.38141e-14	1.92139e-99	0.00112038	62.498	7.63	21.038	9.268	116	6.847	16.479	1.926	82.169	2.548	10.418	3.115	6	6-
10578	GNLY	169	9	65	15	507	18	509	87	179	10	66	24	-12.138	-3.14302	66.0594	4.37544e-16	3.63006e-14	6.71914e-37	6.67142e-06	1.97621e-97	3.65054e-63	2.53542e-44	3.36273e-05	27.303	0.863	40.456	5.99	55.547	2.26	53.494	10.667	76.447	14.878	26.7	9.746	6	6-
9647	PPM1F	2258	659	4302	933	3457	797	3692	1254	2806	992	984	299	-9.53305	-1.77197	28.4304	9.71276e-08	1.70603e-06	2.9894e-181	0	1.33492e-250	1.01832e-222	1.4871e-234	4.75148e-83	16.51	5.244	27.916	7.816	26.477	8.097	33.106	12.913	26.119	8.519	13.051	4.067	6	6-
57716	PRX	1125	300	2040	222	5264	68	2020	110	4775	69	633	79	-9.82787	-4.01252	106.006	7.35307e-25	2.41158e-22	2.06299e-100	1.87176e-277	0	0	0	9.41816e-106	12.077	4.582	22.342	2.789	66.393	1.187	34.67	1.279	106.165	0.674	16.57	2.854	6	6-
51294	PCDH12	686	288	2489	393	1660	293	2376	543	1843	501	1064	158	-10.1345	-2.15623	40.3179	2.1582e-10	6.32691e-09	3.19853e-32	5.3802e-269	6.61032e-157	4.71431e-232	1.07746e-205	9.53625e-163	5.005	2.287	16.115	3.285	12.686	2.97	21.259	5.579	17.117	4.293	14.08	2.144	6	6-
50649	ARHGEF4	132	51	528	91	337	75	251	32	357	65	159	11	-11.9069	-2.47722	48.3764	3.5177e-12	1.43094e-10	4.05307e-08	2.16516e-54	1.86666e-26	1.25632e-37	1.89119e-55	8.33359e-34	2.381	0.637	10.148	1.411	6.155	2.07	10.596	1.89	11.162	1.202	3.31	0.236	6	6-
3577	CXCR1	2330	75	994	136	762	123	767	45	1059	50	83	2	-10.7832	-3.889	101.699	6.46278e-24	1.85827e-21	0	2.56285e-119	7.73285e-78	2.67736e-154	1.33188e-266	1.31674e-21	37.673	1.316	14.31	2.519	12.856	2.763	15.099	1.019	21.716	0.951	2.427	0.06	6	6-
8425	LTBP4	8995	2236	25189	2244	16809	2099	13855	1919	18336	2412	2450	523	-8.06818	-2.71026	61.5484	4.32001e-15	2.95365e-13	0	0	0	0	0	2.51534e-291	72.969	19.736	181.409	20.856	142.779	23.658	137.746	21.914	189.302	22.985	36.043	7.892	6	6-
27147	DENND2A	1001	415	1845	417	1502	172	1123	240	994	354	615	98	-10.4716	-2.10653	38.3281	5.97942e-10	1.61529e-08	9.61986e-48	1.52058e-144	6.38225e-192	4.54398e-117	3.72949e-83	4.68995e-90	11.225	5.059	18.392	5.357	17.612	2.68	15.394	3.782	14.17	4.667	12.496	2.044	6	6-
22854	NTNG1	170	70	560	53	334	24	265	112	323	13	247	35	-11.8524	-2.76457	55.2642	1.05368e-13	5.55696e-12	4.16756e-09	6.19175e-82	5.79681e-53	8.66784e-12	3.6513e-84	1.94857e-39	2.44	1.059	7.042	0.921	4.856	0.657	7.721	2.187	5.98	0.215	6.225	0.907	6	6-
820	CAMP	69	6	103	10	544	22	35	12	131	27	49	22	-12.614	-2.71097	48.6927	2.99385e-12	1.23804e-10	6.08451e-13	4.68942e-16	5.37192e-102	0.00753083	4.592e-19	0.00439098	5.337	0.495	7.285	0.885	42.739	2.368	3.136	1.257	12.57	2.494	6.739	3.147	6	6-
2277	FIGF	174	42	441	61	294	11	284	61	204	0	344	14	-12.0294	-3.57272	84.3008	4.24935e-20	6.55837e-18	3.81399e-18	4.33636e-53	1.14348e-55	2.74944e-30	5.54607e-63	3.38723e-82	11.072	2.914	24.828	4.448	19.66	0.972	22.299	5.49	16.57	0	39.788	1.658	6	6-
116835	HSPA12B	648	161	1344	155	2383	162	1405	264	1651	313	338	43	-10.5046	-2.75405	62.1334	3.20968e-15	2.21616e-13	5.66913e-63	1.38573e-177	0	2.12992e-162	2.14702e-245	8.74878e-57	8.716	3.57	21.925	3.767	38.341	3.584	24.806	5.899	37.26	5.16	7.708	1.004	6	6-
4616	GADD45B	8402	1471	3014	647	5619	640	2916	1210	5249	1214	1906	481	-9.19742	-2.17016	40.515	1.95114e-10	5.76822e-09	0	3.4552e-249	0	1.39333e-123	0	7.50398e-196	270.276	51.141	86.953	23.832	187.251	28.618	112.682	54.043	212.969	46.136	110.422	28.725	6	6-
9754	STARD8	1768	329	2484	348	3352	415	1601	521	2497	391	476	202	-10.0208	-2.26887	43.2419	4.83731e-11	1.59146e-09	1.68119e-217	1.21594e-291	0	2.04812e-103	0	3.79015e-25	15.001	3.037	18.714	3.383	29.776	4.892	16.643	6.222	26.96	3.897	7.323	3.188	6	6-
3090	HIC1	648	170	795	129	625	172	837	444	628	317	93	20	-11.1022	-1.70169	24.8439	6.21643e-07	9.20839e-06	1.07639e-59	3.60325e-85	6.31552e-37	1.22082e-19	2.15655e-30	9.30483e-12	9.587	2.408	10.545	1.927	11.981	4.679	23.979	9.528	22.822	7.595	2.196	0.485	6	6-
84981	C17orf91	1455	494	594	165	960	172	484	145	498	241	1072	303	-10.8024	-1.70853	26.1685	3.12883e-07	4.99804e-06	4.57634e-96	7.99807e-37	6.64513e-90	1.3576e-35	2.51097e-26	3.07239e-98	102.131	25.587	47.056	17.174	74.422	23.485	53.353	17.944	54.855	14.406	88.874	25.972	6	6-
2921	CXCL3	601	52	295	84	364	35	279	73	182	14	670	34	-11.7	-3.04827	67.6755	1.92745e-16	1.73636e-14	8.47971e-111	3.77351e-18	1.87204e-51	2.79258e-24	2.90529e-41	2.84605e-151	24.255	2.263	10.712	3.881	15.165	1.964	13.437	4.071	9.235	0.669	48.574	2.545	6	6-
196883	ADCY4	931	220	1653	361	2703	322	1200	407	1018	222	314	92	-10.4416	-2.10654	38.3377	5.95028e-10	1.61157e-08	1.8419e-94	6.11024e-135	0	3.82818e-73	1.34041e-137	5.16516e-28	10.922	2.801	17.248	4.851	33.111	5.247	17.175	6.694	15.148	3.06	6.66	2.004	6	6-
4855	NOTCH4	1782	506	5128	564	4027	406	5442	1067	3792	868	1038	235	-9.47385	-2.44738	51.1568	8.52769e-13	3.85768e-11	5.198e-148	0	0	0	0	9.7009e-118	9.891	3.058	25.242	3.587	23.431	3.131	37.099	8.349	26.812	5.656	10.456	2.427	6	6-
1910	EDNRB	723	287	2906	350	1761	210	1775	277	4336	247	1921	141	-9.98326	-2.96239	68.0479	1.59573e-16	1.46906e-14	9.82493e-38	0	1.09231e-219	1.2272e-233	0	0	14.505	6.209	52.462	8.039	36.471	5.857	42.499	7.681	109.395	5.865	69.25	5.248	6	6-
126393	HSPB6	835	215	1662	490	1636	400	1076	291	1304	395	357	31	-10.5245	-2.07366	36.8211	1.29483e-09	3.29436e-08	1.05319e-77	5.19081e-93	5.50512e-111	2.3493e-88	7.15405e-131	3.63206e-70	25.408	7.074	45.322	17.074	51.611	16.919	39.388	12.306	50.079	14.194	19.574	1.751	6	6-
147463	ANKRD29	867	225	1952	142	1239	124	974	187	925	203	1227	128	-10.5836	-2.76958	62.6412	2.48012e-15	1.74106e-13	4.07053e-80	4.03692343661516e-317	1.36468e-169	3.32587e-111	3.4891e-124	1.62516e-222	15.476	4.358	31.061	2.903	23.058	3.076	21.135	4.673	20.937	4.267	39.608	4.247	6	6-
285016	FAM150B	273	21	88	19	157	17	94	21	93	8	111	7	-12.7823	-3.0571	64.2249	1.10997e-15	8.35061e-14	4.8058e-53	3.55156e-08	3.33669e-21	4.39922e-10	9.75259e-21	2.54471e-24	8.704	0.724	2.516	0.694	5.186	0.753	3.601	0.93	3.74	0.301	6.374	0.414	6	6-
728113	ANXA8L1	103	17	188	13	327	13	36	7	125	1	130	10	-12.7174	-3.74147	86.0842	1.72438e-20	2.82772e-18	1.02328e-14	4.61205e-32	3.50222e-61	0.000128665	9.49278e-39	7.1895e-27	9.847	1.777	15.768	1.421	33.068	1.723	4.278	0.947	15.291	0.112	22.637	1.781	6	6-
9353	SLIT2	3643	1255	9830	1556	5184	874	4416	921	4362	884	2907	382	-9.09746	-2.33537	47.0968	6.75668e-12	2.58329e-10	8.32518e-234	0	0	0	0	0	28.055	10.517	67.196	13.729	41.81	9.352	41.693	9.987	42.758	7.996	40.603	5.473	6	6-
29941	PKN3	523	203	816	304	839	187	732	262	596	195	203	82	-11.0891	-1.51918	20.7748	5.16577e-06	6.32242e-05	5.89712e-29	1.19659e-30	4.49723e-64	1.52295e-41	1.57486e-55	2.59729e-12	6.053	2.554	8.397	4.031	10.153	3.007	10.353	4.26	8.768	2.653	4.257	1.765	6	6-
3777	KCNK3	1091	162	1894	124	1220	36	1284	75	1190	131	392	47	-10.6527	-3.63304	99.0788	2.42657e-23	6.2881e-21	7.70791e-156	1.65927006499324e-318	2.51702e-241	1.93899e-257	1.98163e-234	1.20669e-67	10.606	1.713	16.358	1.381	12.41	0.486	15.278	1.025	14.714	1.497	6.908	0.85	6	6-
11185	INMT	2687	693	9970	1225	10746	694	3586	452	6143	146	1807	193	-9.04036	-3.32356	83.427	6.61118e-20	9.70411e-18	7.19654e-248	0	0	0	0	0	45.15	12.694	148.445	23.589	189.487	16.213	82.264	10.68	132.708	2.883	55.114	6.042	6	6-
125	ADH1B	9827	4157	28212	4527	19851	2206	17877	3967	14407	1564	8696	786	-7.93265	-2.61188	55.773	8.1343e-14	4.38918e-12	0	0	0	0	0	0	146.802	67.392	374.616	77.445	309.737	45.775	325.554	82.963	272.762	27.445	234.722	21.792	6	6-
1602	DACH1	142	42	874	110	301	45	463	48	249	34	524	38	-11.4933	-2.86331	63.7993	1.37761e-15	1.01459e-13	3.13544e-12	3.1415e-110	4.94508e-33	1.6222e-76	7.26452e-45	1.02409e-108	2.215	0.501	13.742	2.945	5.25	0.55	12.328	1.963	8.188	0.758	10.679	0.753	6	6-
7102	TSPAN7	1925	361	5047	712	3339	569	3025	510	3101	947	1666	204	-9.48397	-2.47481	52.4601	4.39089e-13	2.06539e-11	3.20578e-235	0	0	0	1.73983e-307	1.24921e-280	44.943	9.131	105.283	19.039	81.075	18.463	85.461	16.615	91.617	26.066	70.229	8.848	6	6-
2523	FUT1	484	159	490	119	901	161	513	100	461	100	254	72	-11.209	-2.0449	36.1882	1.79152e-09	4.43443e-08	3.17723e-34	3.79008e-36	7.32264e-85	2.76192e-58	6.85898e-63	4.566e-24	4.388	1.568	3.945	1.236	8.549	2.028	5.695	1.275	5.317	1.065	4.175	1.214	6	6-
27345	KCNMB4	153	57	506	135	487	32	312	101	342	108	153	30	-11.6655	-2.08064	35.5485	2.48784e-09	6.0161e-08	6.46802e-10	2.90612e-33	9.62273e-80	3.90065e-21	2.06666e-33	3.05751e-20	4.059	1.637	12.01	4.101	13.417	1.18	9.989	3.732	11.467	3.38	7.322	1.478	6	6-
2358	FPR2	1189	78	478	67	739	138	262	68	606	22	73	10	-11.2312	-3.04801	66.8496	2.93036e-16	2.51054e-14	2.20822e-240	8.41181e-57	4.3519e-67	2.60346e-23	6.99648e-160	2.85678e-12	26.456	1.881	9.499	1.707	17.109	4.268	7.061	2.113	17.07	0.577	2.934	0.413	6	6-
7450	VWF	42555	6036	93103	15172	77668	12906	59585	12140	27934	5830	9457	2386	-6.64837	-2.38638	49.3982	2.0894e-12	8.987e-11	0	0	0	0	0	0	179.053	27.663	347.212	73.143	342.781	75.442	308.268	72.067	149.8	28.789	72.241	18.681	6	6-
79870	BAALC	163	29	316	52	592	32	353	47	181	41	134	36	-11.8666	-2.66224	55.3306	1.01868e-13	5.39953e-12	2.29521e-21	9.83482e-34	6.81666e-103	8.14628e-52	2.23158e-24	9.35958e-14	2.581	0.499	4.751	1.422	10.182	0.704	7.729	1.044	6.712	0.765	4.303	1.061	6	6-
5166	PDK4	5364	1500	5347	890	7738	1238	2797	432	4540	1010	1926	298	-9.04871	-2.39632	49.7845	1.71592e-12	7.45696e-11	0	0	0	0	0	6.87387e-287	56.214	17.092	49.798	10.685	84.822	18.027	35.852	6.364	60.498	12.441	36.579	5.808	6	6-
10266	RAMP2	975	329	2814	426	3979	307	2217	371	2959	240	1645	204	-9.74634	-2.82556	64.3145	1.06065e-15	8.08102e-14	1.67723e-65	4.98765221698022e-313	0	1.07794e-278	0	1.22683e-275	65.685	23.723	172.592	32.839	273.441	28.771	174.367	34.022	248.191	19.263	197.597	25.439	6	6-
2662	GDF10	522	167	1162	122	837	43	786	68	744	20	254	18	-10.991	-3.53981	89.1986	3.57102e-21	6.51789e-19	1.97151e-38	1.50499e-161	9.73023e-147	5.31439e-139	3.23214e-205	2.19541e-53	7.884	2.739	15.626	2.111	13.195	0.902	14.464	1.44	14.263	0.355	6.943	0.505	6	6-
9457	FHL5	203	64	428	106	220	58	245	63	298	39	204	33	-11.8742	-2.13186	37.4024	9.61025e-10	2.51207e-08	1.05676e-15	4.31438e-31	1.46257e-14	5.32031e-22	5.09113e-55	2.44171e-30	4.715	1.61	8.866	2.82	5.319	1.872	7.693	2.045	8.753	1.467	8.545	1.421	6	6-
63876	PKNOX2	505	165	944	159	589	81	483	176	479	36	306	29	-11.1734	-2.53239	50.5747	1.14713e-12	5.09052e-11	4.3021e-36	1.32229e-97	6.1272e-68	6.35361e-27	7.87595e-108	2.45941e-58	5.262	1.869	8.741	1.898	6.419	1.173	6.156	2.578	6.346	0.441	5.778	0.562	6	6-
2159	F10	243	109	567	113	449	90	346	88	186	40	99	10	-11.6975	-2.1296	37.2382	1.04544e-09	2.71246e-08	8.13893e-11	4.80856e-51	1.63207e-38	4.38166e-31	5.84008e-26	9.2503e-19	6.802	3.301	14.209	3.622	13.045	3.502	11.675	3.428	6.577	1.322	4.997	0.52	6	6-
8835	SOCS2	3571	1382	1955	569	1723	261	872	363	1938	877	2278	702	-9.74483	-1.61999	23.6933	1.12976e-06	1.59473e-05	2.15827e-190	2.49579e-111	4.49033e-184	2.18481e-37	4.00257e-112	2.10241e-188	66.41	27.882	32.42	12.121	33.395	6.745	19.701	9.446	45.689	19.206	76.595	24.264	6	6-
23645	PPP1R15A	9375	2132	6609	1862	11781	2092	3867	1068	6097	1926	4507	872	-8.59279	-2.01711	36.2299	1.75358e-09	4.3611e-08	0	0	0	5.58809e-308	0	0	158.845	39.207	99.784	36.138	208.19	49.257	79.708	25.344	131.039	38.414	138.133	27.464	6	6-
7010	TEK	1948	533	4324	726	4147	370	4165	592	3808	390	1823	229	-9.40976	-2.7962	64.4315	9.99456e-16	7.68446e-14	1.47263e-168	0	0	0	0	1.60261e-303	15.441	4.597	30.426	6.593	34.422	4.075	40.467	6.606	38.417	3.631	26.206	3.377	6	6-
23328	SASH1	2750	1172	4654	1390	4321	1121	3715	914	4798	1304	2389	500	-9.17938	-1.80529	29.2934	6.22063e-08	1.12756e-06	1.2763e-122	2.5616e-253	6.21349e-270	0	0	3.42481e-289	13.32	6.182	19.985	7.714	21.947	7.543	22.113	6.244	29.612	7.414	21.004	4.506	6	6-
7123	CLEC3B	1227	159	4511	142	3671	57	1502	82	2145	90	501	63	-9.89793	-4.24467	124.526	6.46343e-29	3.66669e-26	1.2547e-189	0	0	1.7188e-306	0	1.68499e-83	72.136	10.029	240.559	9.554	220.979	4.661	103.803	6.594	157.502	6.291	52.645	6.861	6	6-
284119	PTRF	8231	2054	14125	2453	14915	2609	13345	3836	12475	5756	5041	1161	-8.09328	-1.97276	34.6848	3.87639e-09	9.02056e-08	0	0	0	0	0	0	87.766	23.813	133.857	29.965	166.337	38.654	174.02	57.494	169.128	72.141	97.406	23.024	6	6-
53826	FXYD6	1680	657	3525	812	3862	536	3536	901	2909	511	1455	185	-9.52386	-2.25387	43.479	4.28544e-11	1.42328e-09	1.22057e-88	4.49866e-270	0	0	0	1.21545e-240	45.909	19.443	85.753	25.404	109.945	20.354	116.918	34.236	100.307	16.423	71.594	9.371	6	6-
2615	LRRC32	2890	556	3053	727	9386	997	1962	880	5980	1554	2727	273	-9.11414	-2.31532	44.7043	2.29148e-11	8.01635e-10	0	4.21791e-225	0	1.2778e-70	0	0	27.271	6.696	25.591	7.859	92.686	16.74	56.008	27.157	221.017	33.457	46.648	4.792	6	6-
3579	CXCR2	1907	79	1288	155	615	163	904	56	954	91	118	34	-10.697	-3.09841	70.0034	5.92026e-17	5.8894e-15	0	9.31179e-167	3.92846e-38	1.77226e-178	3.85428e-198	2.18098e-11	29.473	1.423	17.718	2.744	9.922	3.5	17.021	1.213	18.704	1.654	3.299	0.976	6	6-
10268	RAMP3	1236	233	3508	342	6837	211	1209	322	3711	180	477	62	-9.63921	-3.28602	80.0591	3.63369e-19	4.85804e-17	4.05562e-151	0	0	7.48624e-101	0	3.30661e-78	40.373	8.224	102.786	12.792	231.303	9.581	47.42	14.599	152.861	6.947	28.057	3.759	6	6-
9674	KIAA0040	3987	1135	4311	1367	2816	1047	2501	1057	2804	1001	2585	645	-9.31858	-1.56422	22.2177	2.43417e-06	3.21948e-05	0	5.1354e-213	6.1153e-95	2.5571e-102	2.25814e-231	2.78167e-268	35.336	10.943	33.931	13.88	26.124	12.893	27.148	13.182	31.618	10.423	41.538	10.633	6	6-
57091	CASS4	262	59	289	41	128	41	287	86	100	13	61	11	-12.227	-2.22097	38.4771	5.53988e-10	1.51016e-08	1.61098e-28	2.08482e-34	7.39671e-07	3.89335e-21	7.62002e-19	6.33501e-09	9.609	2.315	12.059	2.869	5.665	2.093	12.341	4.311	4.567	0.567	3.987	1.357	6	6-
27253	PCDH17	2062	543	3132	683	1294	297	3033	1185	1688	358	2396	426	-9.66504	-2.01542	35.5815	2.44605e-09	5.92871e-08	4.45015e-186	1.98464e-254	8.3791e-95	1.01055e-144	8.66859e-232	0	9.6	2.753	12.927	3.643	6.318	1.921	17.356	7.782	10.015	1.956	20.25	3.69	6	6-
1066	CES1	4772	1634	6292	1567	10137	1547	5055	2014	4972	810	3544	593	-8.74421	-2.09089	37.7572	8.01214e-10	2.1288e-08	0	0	0	8.54367e-232	0	0	101.476	37.684	171.124	38.159	226.137	45.694	132.244	60.036	159.962	20.086	135.496	23.257	6	6-
11069	RAPGEF4	677	200	893	246	832	96	760	220	578	310	677	159	-10.7726	-1.87227	30.6109	3.15318e-08	6.09472e-07	1.59419e-54	1.14263e-55	4.59004e-106	7.75295e-58	1.18689e-24	1.0247e-74	7.048	2.264	8.261	2.934	9.06	1.389	9.678	3.22	7.651	3.793	12.772	3.078	6	6-
10319	LAMC3	1291	200	3801	251	2712	87	2191	313	2239	84	394	82	-9.89057	-3.50847	90.3683	1.97713e-21	3.84259e-19	6.33207e-180	0	0	7.80726e-305	0	3.52175e-48	7.97	1.344	20.816	1.775	17.547	0.746	16.605	2.723	17.605	0.609	4.414	0.942	6	6-
7111	TMOD1	372	136	535	119	510	87	321	37	344	168	214	24	-11.4507	-2.17985	39.1781	3.86863e-10	1.07839e-08	9.0813e-23	2.42874e-43	1.7058e-50	2.97713e-50	2.05139e-18	2.79661e-38	8.791	3.505	11.186	3.222	12.666	2.856	9.361	1.237	10.377	4.655	9.193	1.056	6	6-
3040	HBA2	3319	39	773	85	3398	114	338	15	3420	717	275	36	-9.9759	-3.91139	104.007	2.01593e-24	6.31557e-22	0	3.43572e-105	0	4.82597e-73	0	1.1674e-45	842.433	10.791	173.61	24.717	906.199	40.188	105.827	5.382	1107.74	213.39	126.835	17.002	6	6-
7134	TNNC1	667	112	1438	96	1815	293	947	63	971	58	787	66	-10.5143	-3.39806	87.7687	7.35749e-21	1.29776e-18	8.13052e-89	3.26288e-240	5.93243e-185	8.76288e-183	1.93066e-232	9.70893e-155	55.659	9.959	110.007	9.163	153.421	34.023	91.085	7.093	100.29	5.788	116.564	10.181	6	6-
134265	AFAP1L1	836	251	1877	467	1554	241	2463	612	1565	375	916	143	-10.0791	-2.15413	40.4902	1.97608e-10	5.83373e-09	2.54578e-65	8.77105e-132	5.61239e-163	2.89865e-221	8.30754e-196	4.88613e-136	10.664	3.675	21.626	7.237	23.18	6.941	42.659	14.779	27.916	7.225	21.484	3.425	6	6-
9037	SEMA5A	1589	436	6674	1182	2805	707	3537	844	4068	2167	3894	532	-9.15633	-1.99072	34.6756	3.89478e-09	9.0433e-08	2.3271e-137	0	1.99621e-182	0	1.53941e-169	0	4.954	1.481	18.434	4.222	9.178	3.062	13.572	3.715	16.171	7.927	22.048	3.087	6	6-
1674	DES	2276	366	7782	1041	5622	868	1221	193	2312	105	754	70	-9.38555	-3.05851	73.7469	8.88051e-18	9.86253e-16	0	0	0	1.66199e-159	0	6.02127e-143	41.096	7.17	125.27	21.53	105.823	21.78	26.796	4.878	52.932	2.232	24.619	2.349	6	6-
2869	GRK5	1733	491	3890	665	4312	491	2753	694	2760	323	1743	261	-9.50243	-2.51094	53.0543	3.24454e-13	1.57645e-11	1.38335e-144	0	0	5.13783e-243	0	2.02438e-264	27.118	8.342	54.211	11.92	70.414	10.677	52.463	15.221	54.809	5.948	49.354	7.592	6	6-
7049	TGFBR3	1906	549	4678	812	2772	746	2197	438	3752	443	2276	258	-9.4677	-2.41583	48.9449	2.63254e-12	1.10514e-10	1.3456e-155	0	3.86331e-165	4.89602e-242	0	0	11.984	3.774	26.007	5.853	18.355	6.518	17.13	3.917	30.246	3.267	26.113	3.027	6	6-
948	CD36	1174	384	3913	502	1213	183	3300	334	1596	726	2194	215	-9.74812	-2.47717	50.6798	1.08732e-12	4.85592e-11	5.42759e-82	0	2.5262e-130	0	4.50094e-92	0	34.192	12.097	102.075	16.743	36.647	7.408	115.746	13.53	58.694	24.962	115.181	11.628	6	6-
29091	STXBP6	206	29	483	89	565	12	498	18	681	36	370	34	-11.3984	-3.80665	99.6106	1.85513e-23	4.92901e-21	2.82107e-31	3.81219e-47	1.78232e-117	6.72376e-111	3.8543e-168	2.98428e-71	4.373	0.667	9.153	2.164	12.485	0.354	12.815	0.534	18.308	0.9	14.19	1.341	6	6-
79413	ZBED2	242	18	439	53	177	52	631	83	399	20	939	104	-11.3543	-3.09999	70.9771	3.61395e-17	3.70034e-15	1.69549e-47	1.88442e-57	4.38065e-10	8.7291e-93	9.29452e-100	4.96481e-166	4.5	0.363	7.28	1.129	3.431	1.344	14.256	2.16	9.407	0.438	31.573	3.595	6	6-
51208	CLDN18	5780	631	23599	909	12783	1089	8023	553	9891	518	12367	2251	-8.1422	-3.62974	99.7318	1.74501e-23	4.69587e-21	0	0	0	0	0	0	146.659	9.183	655.529	26.31	252.684	31.314	264.408	20.161	417.573	7.811	300.481	53.673	6	6-
1843	DUSP1	31254	4619	38658	7927	31681	7487	11672	2692	25707	4347	12979	2527	-7.30241	-2.31961	46.507	9.12904e-12	3.43402e-10	0	0	0	0	0	0	637.166	102.106	703.296	185.1	672.597	212.125	288.65	76.713	663.927	104.405	478.151	95.733	6	6-
257019	FRMD3	139	28	298	64	142	30	201	48	196	31	220	17	-12.1575	-2.46766	47.5635	5.32514e-12	2.0776e-10	8.17864e-17	7.53559e-26	2.21419e-12	1.32766e-19	2.01669e-33	4.2015e-45	2.219	0.485	4.238	1.171	2.366	0.666	3.907	1.074	3.971	0.583	6.356	0.505	6	6-
6909	TBX2	990	450	6543	526	4266	466	2755	648	3294	342	769	99	-9.4524	-2.6837	57.6308	3.16236e-14	1.83872e-12	3.68522e-39	0	0	4.18534e-261	0	1.0983e-126	11.418	5.642	67.093	6.95	51.441	7.468	38.831	10.5	48.289	4.637	16.069	2.123	6	6-
5138	PDE2A	1251	205	2097	410	1158	288	1003	307	517	178	290	61	-10.4543	-2.03396	35.9377	2.03731e-09	4.98406e-08	2.83146e-168	1.96626e-190	6.16431e-77	7.20979e-71	1.31765e-45	7.69216e-36	12.278	2.188	18.284	4.61	11.891	3.927	12.047	4.237	6.453	2.053	5.159	1.113	6	6-
155038	GIMAP8	960	364	4312	895	5179	550	3128	1138	3115	429	1488	331	-9.41796	-2.18882	40.6569	1.81447e-10	5.38696e-09	6.86929e-54	0	0	2.68915e-169	0	1.70202e-171	9.399	3.876	37.506	10.039	53.053	7.482	37.479	15.669	38.788	4.936	26.406	6.027	6	6-
7075	TIE1	1798	549	5292	924	4400	691	6210	1325	3508	670	1449	216	-9.20692	-2.3358	47.2673	6.19355e-12	2.39416e-10	6.11273e-137	0	0	0	0	2.6271e-220	17.565	5.833	45.93	10.341	44.976	9.38	74.248	18.204	43.588	7.692	25.658	3.925	6	6-
85407	NKD1	293	91	563	98	354	93	429	92	417	83	122	19	-11.5279	-2.17741	39.6337	3.06348e-10	8.74863e-09	9.13055e-23	4.16235e-57	1.31434e-22	4.29703e-45	9.5901e-61	8.49885e-19	4.528	1.527	7.748	1.735	5.709	1.997	8.075	1.993	8.179	1.509	3.412	0.546	6	6-
762	CA4	794	71	1179	38	2613	4	1306	8	1298	6	439	20	-10.4529	-5.92631	189.769	3.57157e-43	1.1835e-39	2.85207e-145	9.22376e-237	0	0	0	1.46236e-102	32.073	3.093	42.861	1.757	108.949	0.225	62.947	0.447	65.93	0.287	31.862	1.499	6	6-
9806	SPOCK2	100	8	237	19	211	23	167	75	217	7	60	5	-12.3826	-3.23254	67.7721	1.83533e-16	1.66769e-14	1.68019e-19	9.52555e-38	2.61709e-28	1.00615e-06	5.33732e-59	2.40669e-12	80.7	9.888	127.32	27.838	115.565	11.271	82.151	27.765	171.283	5.656	129.565	18.018	6	6-
1003	CDH5	4754	951	11621	1464	12241	1045	11187	1720	10568	1044	4551	593	-8.38103	-2.93137	70.9147	3.73012e-17	3.80074e-15	0	0	0	0	0	0	44.35	9.649	96.295	15.647	119.508	13.545	127.771	22.572	125.412	11.444	76.965	10.29	6	6-
7148	TNXB	1127	231	1192	77	1370	95	950	123	689	85	174	31	-10.6885	-3.05424	73.4481	1.03317e-17	1.12364e-15	7.94967e-129	4.88131e-202	6.37876e-219	5.45592e-140	2.14469e-129	1.83371e-24	51.477	11.285	47.473	4.619	65.49	6.408	52.923	7.673	38.788	4.453	13.951	2.554	6	6-
57406	ABHD6	434	120	1095	237	532	168	577	243	322	148	179	87	-11.0828	-1.48285	19.583	9.63233e-06	0.000111457	5.63929e-38	3.65366e-90	9.59271e-26	2.02423e-24	2.89621e-19	6.72671e-08	7.305	2.192	16.424	4.57	9.34	3.93	11.817	5.729	6.876	2.932	5.45	2.722	6	6-
2354	FOSB	33574	5199	17010	2985	20317	1774	5639	199	13152	723	16395	451	-7.73821	-3.7764	102.833	3.64582e-24	1.07783e-21	0	0	0	0	0	0	369.465	62.446	166.254	37.653	234.561	27.135	76.296	3.098	185.133	9.364	328.799	9.27	6	6-
6283	S100A12	304	22	58	8	124	27	71	3	227	7	45	6	-12.6071	-3.45446	72.8978	1.3654e-17	1.45481e-15	1.84538e-60	8.09576e-08	9.95589e-11	1.47605e-15	6.63699e-62	7.01464e-08	56.804	4.262	10.401	1.707	22.47	7.037	14.141	0.716	50.609	1.604	14.506	2.056	6	6-
131873	COL6A6	1699	260	2117	518	1951	266	2579	900	1544	57	1928	190	-9.86425	-2.77992	59.5285	1.20535e-14	7.62059e-13	3.38874e-238	7.39234e-152	4.21891e-224	2.24131e-149	0	0	7.461	1.244	8.24	2.606	8.986	1.623	13.923	5.575	8.641	0.294	15.37	1.552	6	6-
8013	NR4A3	979	120	264	37	602	50	990	59	430	61	196	11	-11.1692	-3.35399	84.8855	3.16147e-20	4.95218e-18	2.32087e-155	1.07667e-31	2.82894e-90	2.06714e-197	4.11755e-76	6.71716e-44	21.797	2.92	5.232	0.945	14.055	1.753	27.162	1.869	12.296	1.602	7.982	0.459	6	6-
858	CAV2	1993	723	5862	595	2555	372	2224	242	2408	471	6658	970	-9.28215	-2.60993	56.9503	4.46969e-14	2.55295e-12	9.89278e-119	0	2.52931e-280	0	0	0	30.798	12.131	80.67	10.532	41.207	7.988	41.861	5.242	47.227	8.565	186.189	27.866	6	6-
23336	SYNM	1247	471	1274	373	2010	261	2251	358	1646	820	1781	477	-9.70817	-1.90339	31.8265	1.68581e-08	3.40898e-07	7.38004e-70	3.22423e-72	6.40924e-238	1.15052e-292	1.11493e-79	1.97584e-172	11.516	3.137	12.594	3.377	16.733	2.733	23.051	4.27	20.656	5.909	19.772	5.786	6	6-
219348	PLAC9	364	121	1107	74	833	54	494	59	399	77	159	25	-10.9447	-2.88733	64.7917	8.3248e-16	6.61885e-14	7.57461e-26	8.7132e-186	5.25726e-136	2.50239e-76	1.62033e-59	3.51639e-24	31.393	11.112	87.63	7.3	72.686	6.481	48.999	6.854	42.549	7.948	24.32	3.985	6	6-
5787	PTPRB	5891	1121	11365	1639	9642	1047	9354	1469	8876	744	3698	646	-8.25449	-2.81117	65.6004	5.52267e-16	4.48303e-14	0	0	0	0	0	0	22.394	4.643	38.311	7.139	38.443	5.53	43.725	7.883	43.028	3.321	25.534	4.571	6	6-
3039	HBA1	2423	29	467	82	4248	158	219	14	2689	545	415	43	-9.8431	-3.73635	95.8785	1.22157e-22	2.75708e-20	0	2.68106e-47	0	8.9441e-44	0	2.99303e-76	910.039	11.872	155.189	35.276	1676.17	82.411	101.445	7.432	1288.57	239.993	283.148	30.044	6	6-
8547	FCN3	400	119	2306	158	12823	19	1329	38	3541	17	410	38	-9.21682	-4.92438	133.091	8.63408e-31	5.4918e-28	4.57341e-32	0	0	6.17682e-308	0	1.17415e-78	19.364	7.581	112.157	8.792	661.469	1.281	82.189	4.275	227.387	0.974	37.353	3.51	6	6-
1346	COX7A1	239	88	369	120	694	83	395	111	408	208	75	17	-11.2386	-1.78959	27.1615	1.87144e-07	3.12596e-06	9.0159e-15	1.94613e-18	6.5243e-87	2.46748e-31	8.91154e-20	3.03907e-09	16.891	6.651	23.776	9.703	49.96	8.161	32.505	10.659	35.857	17.527	9.442	2.223	6	6-
90139	TSPAN18	949	248	2545	521	2603	417	2460	371	1848	791	858	77	-9.65421	-2.33056	45.9729	1.19901e-11	4.4754e-10	5.35212e-87	7.43203e-221	4.96517e-266	0	1.64264e-117	8.00972e-165	8.612	2.448	20.513	5.417	24.724	5.258	27.338	4.737	21.336	8.434	14.116	1.3	6	6-
5348	FXYD1	168	58	334	72	467	32	194	37	175	10	82	10	-11.7766	-2.75318	55.9691	7.36191e-14	4.02413e-12	1.20857e-11	1.81725e-28	3.73831e-75	5.02005e-23	3.35289e-43	1.7989e-14	40.163	12.588	66.208	16.835	92.106	12.803	62.235	14.883	69.044	6.538	62.155	6.71	6	6-
5764	PTN	513	121	539	140	355	101	875	55	527	218	702	285	-10.7821	-1.98919	33.0574	8.9477e-09	1.93821e-07	1.25696e-52	1.12336e-36	2.15768e-20	8.51387e-172	3.95737e-36	8.07866e-40	14.383	3.671	13.529	4.495	10.33	3.936	29.57	2.146	18.664	7.214	35.488	14.839	6	6-
94	ACVRL1	2583	457	5226	651	9751	1055	4962	1162	5908	716	1989	278	-8.7229	-2.74241	62.7726	2.31998e-15	1.63961e-13	0	0	0	0	0	9.07354576142788e-314	25.043	4.819	45.013	7.231	98.923	14.212	58.882	15.845	72.856	8.158	34.956	5.013	6	6-
1901	S1PR1	4100	730	5455	933	6842	680	4728	905	6857	525	2639	376	-8.72198	-2.82943	65.7708	5.06535e-16	4.15319e-14	0	0	0	0	0	0	53.181	10.288	62.945	13.863	92.725	12.256	74.854	16.478	112.987	8.009	61.989	9.069	6	6-
3397	ID1	1302	513	2679	726	2577	112	1247	314	2168	177	909	224	-9.70979	-2.48272	48.6395	3.07618e-12	1.26111e-10	5.52878e-68	2.5331e-168	0	2.02569e-110	0	4.22434e-96	105.962	39.943	201.526	60.446	221.129	9.781	105.943	27.801	187.687	17.617	102.17	26.117	6	6-
55321	C20orf46	293	83	789	67	900	36	597	84	567	125	198	61	-10.9357	-2.72918	58.1409	2.43996e-14	1.43862e-12	2.81636e-25	7.06721e-121	6.24265e-168	2.12656e-84	2.74584e-76	2.74571e-17	7.295	2.238	17.563	1.91	23.287	1.246	17.962	2.916	17.853	3.67	8.896	2.821	6	6-
4858	NOVA2	114	25	378	34	435	34	367	55	249	44	72	12	-11.6724	-2.82959	61.1219	5.3649e-15	3.62087e-13	1.8839e-13	1.05161e-56	3.61245e-67	6.17761e-50	2.22664e-39	6.41594e-11	2.548	0.605	7.545	0.87	10.115	1.056	9.933	1.716	7.044	1.159	2.906	0.498	6	6-
1580	CYP4B1	3292	1454	24143	1944	16851	5388	1063	102	10483	788	5693	1296	-7.98719	-2.57425	51.8529	5.98192e-13	2.75352e-11	2.5545e-136	0	0	1.66477e-180	0	0	87.963	38.528	498.807	44.726	536.354	202.825	25.192	3.041	367.9	22.724	203.677	51.574	6	6-
92162	TMEM88	289	43	152	20	338	25	121	22	148	15	68	10	-12.0468	-2.95439	63.8571	1.33779e-15	9.88738e-14	4.92766e-42	8.0984e-20	2.67388e-53	4.1106e-15	5.11493e-31	4.50427e-11	16.963	2.708	8.092	1.343	20.314	2.041	8.349	1.766	10.85	1.047	7.134	1.087	6	6-
3043	HBB	15526	275	2280	717	21461	909	1363	44	16336	4384	6255	696	-8.01873	-3.61721	88.7478	4.48487e-21	8.1153e-19	0	1.10198e-114	0	0	0	0	1585.88	29.78	215.242	83.738	2202.73	129.25	158.134	6.001	2051.34	537.974	1128.06	131.211	6	6-
54567	DLL4	804	254	2416	362	1523	248	2917	1057	2359	539	642	130	-9.68666	-2.11379	38.7868	4.72725e-10	1.30046e-08	2.02333e-59	4.6911e-271	5.04641e-154	9.57811e-159	8.4232e-306	5.69414e-80	9.202	3.16	24.584	4.747	18.226	3.944	40.804	16.998	34.32	7.253	13.313	2.767	6	6-
51299	NRN1	245	85	776	294	513	70	480	100	317	121	300	59	-11.0588	-1.92108	31.6719	1.82543e-08	3.65609e-07	1.72271e-16	3.20367e-28	1.50175e-59	1.53139e-51	4.9928e-25	5.78291e-39	4.906	1.846	13.864	6.743	10.699	1.948	11.663	2.8	8.042	2.854	10.857	2.195	6	6-
1805	DPT	2538	946	2461	608	3054	411	1476	500	1623	382	1995	223	-9.61708	-2.14525	39.4158	3.42519e-10	9.66328e-09	1.83776e-144	7.26291e-174	0	6.63395e-90	4.07396e-206	0	61.945	25.008	53.693	16.996	77.485	13.942	43.555	17.019	50.108	10.995	87.889	10.111	6	6-
2078	ERG	1632	519	2508	550	1952	362	2908	515	1816	830	1655	525	-9.64491	-1.88504	31.7401	1.76249e-08	3.54694e-07	4.35714e-118	1.36679e-202	4.67882e-177	0	1.29767e-103	2.86575e-132	21.768	4.908	33.047	10.411	17.811	6.599	50.227	15.504	33.077	8.452	33.816	8.488	6	6-
8676	STX11	2752	254	2296	227	2066	190	1417	532	1817	243	1164	222	-9.82444	-2.79614	62.3462	2.88084e-15	1.99567e-13	0	0	1.94304e-294	6.86311e-73	0	4.08645e-151	18.931	1.902	14.014	1.789	14.889	1.816	11.958	5.155	15.914	1.963	14.526	2.841	6	6-
653509	SFTPA1	84919	28897	350159	28750	156252	38189	173879	40886	187681	2055	139278	32327	-5.26168	-2.70047	55.0079	1.20046e-13	6.23654e-12	0	0	0	0	0	0	1963.34	723.661	7185.19	760.902	3770.98	1226.21	4895.63	1319.6	5483.23	55.708	5801.17	1383.21	6	6-
3727	JUND	5779	2521	3418	661	5717	1560	2609	962	6466	1453	1737	666	-8.89014	-1.69286	25.707	3.97391e-07	6.16955e-06	1.58727e-244	4.08451159206605e-312	0	5.72552e-138	0	2.01954e-106	128.747	60.867	68.007	16.866	132.524	48.302	70.397	29.925	182.361	38.153	69.891	27.568	6	6-
90952	ESAM	2298	606	5151	820	5417	1266	4538	892	4220	827	2051	335	-9.05602	-2.28994	45.6084	1.4442e-11	5.28115e-10	6.07346e-207	0	0	0	0	5.27628e-295	51.869	14.823	103.85	21.199	127.206	39.715	124.027	28.108	120.57	22.003	83.605	14.049	6	6-
6527	SLC5A4	140	24	272	41	243	20	342	37	210	25	190	18	-11.9572	-3.04576	69.9916	5.95583e-17	5.89683e-15	1.34896e-19	1.41441e-31	4.60544e-37	3.57391e-55	6.41837e-41	2.08384e-36	2.872	0.534	4.98	0.963	5.191	0.57	8.51	1.061	5.457	0.604	7.043	0.686	6	6-
22899	ARHGEF15	1034	237	2287	362	2537	258	2217	385	1468	277	723	110	-9.92703	-2.58037	56.4607	5.73326e-14	3.19207e-12	6.9082e-108	5.33172e-247	0	3.48285e-271	6.73186e-219	6.84805e-109	9.691	2.416	19.04	3.887	24.884	3.36	25.439	5.076	17.502	3.051	12.284	1.918	6	6-
51705	EMCN	817	273	2401	379	866	241	1031	301	1199	174	2130	267	-10.0927	-2.23138	42.0065	9.09699e-11	2.89751e-09	9.5536e-56	3.83394e-259	1.27933e-49	2.22652e-77	3.03386e-208	0	21.836	6.891	55.892	12.38	19.153	6.392	32.375	9.928	27.071	4.388	60.603	7.539	6	6-
221303	FAM162B	86	25	373	54	128	16	315	30	195	25	235	25	-11.993	-2.82571	60.3528	7.92925e-15	5.13688e-13	4.06177e-08	1.2629e-43	2.87272e-16	3.32645e-54	4.49898e-37	6.28469e-43	3.988	1.248	15.607	2.867	6.111	1.032	17.346	1.916	11.346	1.374	19.548	2.15	6	6-
4311	MME	1616	729	3384	293	2378	316	3324	204	2325	1129	3297	1511	-9.38243	-2.23698	40.0001	2.53946e-10	7.36233e-09	2.3219e-64	0	7.68319e-278	0	3.12469e-118	2.16947e-145	22.465	5.431	34.566	4.128	17.053	5.092	58.715	3.342	56.634	11.087	40.941	19.241	6	6-
10351	ABCA8	1879	757	3675	749	2375	648	2159	541	1633	472	2347	214	-9.54386	-2.06432	36.6766	1.39446e-09	3.52648e-08	1.0615e-93	0	6.36121e-139	2.41121e-192	7.91626e-172	0	12.388	5.433	21.497	5.658	16.407	5.936	17.467	5.025	13.71	3.654	28.074	2.625	6	6-
2009	EML1	1081	456	1746	596	1616	272	1227	329	1634	677	899	394	-10.0119	-1.57863	22.5647	2.03188e-06	2.73217e-05	4.61994e-50	2.0178e-76	3.14408e-159	1.10701e-101	1.07464e-109	5.19519e-44	15.621	5.372	15.226	5.953	14.787	5.145	14.926	5.18	18.213	8.861	14.27	6.404	6	6-
857	CAV1	14156	2309	52260	3280	29930	1870	23891	1573	20308	2012	32216	3275	-7.17161	-3.4896	96.0015	1.14795e-22	2.67728e-20	0	0	0	0	0	0	237.837	42.107	782.356	63.124	524.502	43.66	488.37	37.017	494.642	39.791	979.122	102.28	6	6-
114789	SLC25A25	4051	627	1924	654	3256	366	1080	426	1693	430	1123	289	-9.63563	-2.07395	36.7794	1.32281e-09	3.35335e-08	0	1.09583e-84	0	4.86719e-51	2.45384e-201	2.21848e-113	52.469	8.824	22.169	9.704	44.063	6.587	17.074	7.746	27.857	6.55	37.071	6.96	6	6-
100302650	LOC100302650	388	41	95	15	364	44	392	37	147	67	240	21	-11.7874	-2.79977	58.964	1.60579e-14	9.94266e-13	5.97033e-67	6.24188e-11	6.01203e-46	1.80086e-67	2.32219e-09	3.44713e-47	10.051	1.149	2.197	0.445	9.802	1.583	12.268	1.333	4.805	2.043	11.194	1.008	6	6-
687	KLF9	6792	2470	4426	1194	6476	1349	3054	1094	5333	1559	2775	879	-8.78145	-1.71377	26.6995	2.37686e-07	3.8916e-06	0	7.15092e-279	0	1.95696e-169	0	8.10207e-222	49.571	19.619	28.669	9.984	49.509	13.679	27.336	11.245	49.551	13.363	36.737	11.935	6	6-
5745	PTH1R	222	69	638	106	461	36	316	68	311	86	78	14	-11.5256	-2.36429	45.1898	1.78831e-11	6.36213e-10	1.53917e-17	2.31187e-67	6.01589e-71	3.22617e-33	6.38193e-35	2.88651e-11	4.655	1.569	11.941	2.546	10.064	1.049	8.034	1.992	8.259	2.125	2.955	0.545	6	6-
9200	PTPLA	85	22	279	51	130	36	99	31	115	39	158	28	-12.3327	-1.95735	30.9851	2.60016e-08	5.08169e-07	5.93193e-09	1.66133e-27	3.36425e-08	1.0359e-07	2.93614e-11	2.38455e-22	2.917	0.815	8.594	2.004	4.617	1.717	4.074	1.475	4.973	1.582	9.758	1.783	6	6-
6886	TAL1	451	151	971	161	1780	134	922	148	973	90	463	45	-10.5643	-2.84675	64.2766	1.0812e-15	8.16345e-14	4.51921e-31	1.33551e-101	3.2675e-276	1.38082e-119	2.0608e-205	3.42756e-87	3.423	1.247	6.542	1.4	14.151	1.413	8.581	1.582	9.401	0.802	6.374	0.635	6	6-
119385	AGAP11	426	133	669	126	747	72	554	41	421	73	299	46	-11.1203	-2.69209	58.2819	2.27126e-14	1.35437e-12	2.08902e-32	1.01935e-63	3.98232e-105	3.61816e-103	3.69082e-67	1.67515e-45	5.585	1.893	7.754	1.891	10.269	1.309	8.882	0.751	6.985	1.119	7.071	1.117	6	6-
100507632	LOC100507632	190	39	487	18	222	21	266	18	279	7	154	15	-11.8631	-3.72731	93.8674	3.37384e-22	7.30071e-20	1.12375e-22	7.96617e-96	8.21232e-32	1.16574e-51	1.20869e-77	2.66559e-29	3.031	0.675	6.92	0.329	3.695	0.466	5.167	0.402	5.648	0.131	4.445	0.445	6	6-
654	BMP6	508	200	1099	217	1161	116	582	225	961	103	261	74	-10.6971	-2.18522	39.2668	3.69674e-10	1.03736e-08	2.09765e-27	4.5057e-99	3.35727e-159	4.86834e-29	1.68351e-191	1.0593e-24	6.967	2.991	13.337	3.41	16.734	2.21	9.85	4.364	16.825	1.656	6.507	1.889	6	6-
85358	SHANK3	2803	580	6285	995	4781	649	5470	1205	3432	893	962	189	-9.06226	-2.34016	47.7101	4.94152e-12	1.95334e-10	7.22536965919825e-317	0	0	0	0	9.60267e-123	14.691	3.31	29.209	5.975	26.272	4.726	35.221	8.905	22.917	5.494	9.151	1.843	6	6-
728	C5AR1	7926	509	3764	736	3690	1154	2460	885	2932	992	948	365	-9.13126	-1.98069	32.9467	9.47206e-09	2.03499e-07	0	0	4.53002e-174	1.27063e-135	1.12775e-258	6.56294e-58	137.994	9.617	58.407	14.678	66.991	27.921	52.083	21.574	64.741	20.333	29.851	11.812	6	6-
54922	RASIP1	1078	156	1890	213	2895	171	1850	335	1742	220	410	41	-9.90421	-3.08893	76.3169	2.41605e-18	2.84904e-16	3.8285e-157	4.142e-253	0	6.46427e-220	0	2.05283e-76	12.781	2.01	19.925	2.893	35.881	2.817	26.798	5.579	26.249	3.067	8.806	0.904	6	6-
9021	SOCS3	19455	3029	10688	2138	11931	2515	5489	2082	7918	1618	6122	1769	-7.98799	-2.08161	37.7579	8.00921e-10	2.1288e-08	0	0	0	1.69287e-275	0	0	283.376	47.917	138.584	35.673	181.443	50.904	97.456	42.531	146.424	27.727	161.409	47.905	6	6-
1326	MAP3K8	2803	623	1410	447	2176	328	1104	480	1036	330	1286	488	-9.77559	-1.7604	27.4297	1.62913e-07	2.74442e-06	3.2303e-298	1.9693e-70	2.50714e-233	5.00569e-43	1.46479e-98	5.05504e-80	35.765	8.638	16.003	6.534	29.012	5.815	17.197	8.598	16.794	4.952	29.717	11.578	6	6-
6279	S100A8	2315	116	927	231	1545	350	980	282	2276	239	809	315	-9.96183	-2.39063	45.1094	1.86326e-11	6.57307e-10	0	8.61519e-66	1.79844e-114	8.30734e-75	0	1.13119e-48	322.393	16.956	121.275	36.753	212.823	67.903	150.669	51.401	384.499	40.347	196.875	80.719	6	6-
200315	APOBEC3A	361	19	68	26	350	21	81	20	227	13	131	6	-12.0223	-3.33501	71.9201	2.24085e-17	2.35177e-15	2.97727e-78	0.00205267	1.26448e-59	6.5732e-08	6.15175e-55	8.73901e-31	21.596	1.592	3.635	1.776	21.534	1.742	5.705	1.612	16.701	0.911	13.783	0.654	6	6-
54538	ROBO4	2088	317	6123	493	5993	308	4821	582	4308	363	1329	104	-9.01271	-3.44767	93.1387	4.87552e-22	9.93565e-20	1.08929e-294	0	0	0	0	8.10342e-268	20.973	3.462	54.645	5.673	62.976	4.299	59.25	8.22	55.03	4.285	24.195	1.943	6	6-
9365	KL	336	141	638	90	628	23	451	75	623	102	306	33	-11.065	-2.80633	60.787	6.35978e-15	4.19786e-13	2.72711e-16	4.21072e-75	6.17676e-120	3.38106e-57	2.31621e-101	1.97823e-55	2.554	1.166	4.304	0.784	4.999	0.243	4.203	0.803	6.027	0.911	4.218	0.467	6	6-
374	AREG	3976	529	666	230	933	292	571	129	785	62	1858	740	-9.92534	-2.13266	37.0177	1.17061e-09	3.01116e-08	0	2.74658e-29	7.6656e-45	6.49497e-57	2.06508e-174	1.15435e-106	143.684	20.638	21.622	9.517	34.868	14.67	24.708	6.458	35.728	2.65	120.789	49.629	6	6-
2627	GATA6	1181	455	1267	293	1202	361	730	257	976	459	875	114	-10.2017	-1.73973	26.656	2.43089e-07	3.97077e-06	3.81644e-64	5.57525e-97	1.92677e-61	2.66022e-42	1.51401e-53	2.22131e-143	13.207	5.531	12.595	3.754	14.055	5.609	9.979	4.038	13.874	6.034	17.729	2.371	6	6-
200504	GKN2	230	90	1901	32	584	138	444	25	533	0	249	16	-10.8572	-3.9462	92.2198	7.75638e-22	1.55787e-19	6.23826e-13	0	4.36461e-42	6.05978e-90	5.42924e-165	8.60192e-54	14.99	6.282	112.691	2.387	38.863	12.511	33.842	2.221	43.285	0	28.954	1.931	6	6-
152273	FGD5	2883	552	4666	740	4128	760	3632	956	3518	916	1481	438	-9.09661	-2.14408	40.4306	2.03727e-10	6.00595e-09	0	0	0	1.21567e-305	0	1.44724e-128	18.465	3.848	26.51	5.43	27.705	6.763	28.55	8.627	28.692	6.888	17.209	5.219	6	6-
1839	HBEGF	6086	412	2557	498	6998	990	2312	356	2200	402	3482	342	-9.01997	-2.87967	67.4629	2.14686e-16	1.91755e-14	0	2.34911e-232	0	3.29682e-307	0	0	103.999	7.641	38.938	9.748	124.714	23.509	48.057	8.519	47.684	8.087	107.625	10.863	6	6-
219790	RTKN2	780	254	7657	644	2562	61	2549	312	2652	95	11546	711	-8.90691	-3.70135	97.0091	6.9011e-23	1.66499e-20	2.78912e-55	0	0	0	0	0	4.399	1.56	38.3	4.162	15.147	0.478	17.656	2.481	19.053	0.629	118.177	7.461	6	6-
1036	CDO1	187	61	722	74	448	47	341	39	441	111	378	25	-11.2465	-2.81299	61.8745	3.66065e-15	2.51925e-13	5.46012e-14	3.02652e-102	5.57592e-61	1.1388e-53	2.90362e-53	7.93998e-81	4.976	1.757	17.188	2.255	12.379	1.738	10.949	1.445	14.83	3.485	18.142	1.235	6	6-
27074	LAMP3	6611	2847	15544	2012	6064	1748	8209	3251	10517	1427	8320	2092	-8.07329	-1.97922	33.5453	6.96228e-09	1.5383e-07	2.80148e-287	0	0	0	0	0	77.616	36.331	162.264	27.061	74.426	28.516	117.758	53.617	156.928	19.697	176.956	45.674	6	6-
3398	ID2	2660	520	3213	1049	2371	562	2244	685	1305	684	2084	523	-9.41739	-1.73806	27.0555	1.97699e-07	3.2908e-06	4.77432114618211e-315	1.36028e-151	1.83159e-166	2.8634e-158	4.40987e-57	3.12083e-215	84.974	17.946	91.98	38.364	78.485	24.948	86.146	30.36	52.539	25.79	119.795	30.988	6	6-
5199	CFP	454	35	437	82	898	94	363	99	575	33	98	34	-11.1384	-2.75619	57.0626	4.22161e-14	2.42772e-12	3.46041e-88	3.67539e-42	1.12316e-120	4.9095e-30	2.93183e-139	8.47101e-08	12.233	1.021	10.537	2.53	25.125	3.521	11.801	3.715	19.58	1.049	4.763	1.702	6	6-
64651	CSRNP1	8444	1498	7404	1078	9904	743	3920	597	7410	1185	3923	630	-8.45768	-2.79293	65.4406	5.98909e-16	4.83504e-14	0	0	0	0	0	0	104.341	20.116	81.369	15.26	127.902	12.757	59.153	10.359	116.345	17.218	87.802	14.476	6	6-
51267	CLEC1A	239	85	533	111	660	115	511	120	358	151	349	93	-11.1007	-1.87978	30.9068	2.70721e-08	5.2835e-07	1.59922e-15	4.36923e-46	6.9734e-64	3.82736e-49	4.13322e-24	2.28553e-34	5.672	2.185	11.304	3.017	16.287	3.793	14.67	3.973	10.75	4.225	14.952	4.1	6	6-
9507	ADAMTS4	14494	504	854	322	3010	571	3078	637	1821	934	1778	84	-8.96689	-2.59771	49.9116	1.6083e-12	7.04763e-11	0	3.6692e-31	9.75487e-267	0	6.98467e-83	0	126.192	4.774	6.603	3.212	27.433	6.907	32.827	7.804	20.173	9.554	28.068	1.36	6	6-
353514	LILRA5	235	20	137	26	328	49	106	33	178	18	39	12	-12.1358	-2.52762	46.8329	7.73058e-12	2.92897e-10	4.03257e-44	1.03604e-13	3.49355e-36	2.46001e-08	1.43541e-36	0.000535745	15.916	1.504	8.227	2.024	23.621	4.615	9.226	3.329	15.997	1.439	4.965	1.545	6	6-
641700	ECSCR	730	171	1701	252	1384	203	1128	295	695	152	384	75	-10.3323	-2.3097	45.816	1.29897e-11	4.79179e-10	9.01199e-75	6.34126e-193	3.01083e-151	5.11858e-96	7.54386e-94	3.05108e-49	34.887	8.794	73.392	13.786	68.05	13.49	63.937	19.402	41.652	8.614	32.904	6.645	6	6-
154	ADRB2	816	181	1528	262	1279	180	514	121	1126	133	687	194	-10.3533	-2.37777	47.7023	4.96103e-12	1.95737e-10	2.33694e-87	3.31731e-155	4.20465e-144	2.31309e-49	9.03863e-216	1.51443e-63	16.468	3.961	27.516	6.056	26.882	5.048	12.585	3.414	28.79	3.162	25.056	7.276	6	6-
53405	CLIC5	6128	1522	11351	1671	8227	2277	8971	722	12047	715	10797	1739	-8.11001	-2.77418	61.2596	5.00241e-15	3.39808e-13	0	0	0	0	0	0	43.431	11.74	71.39	13.568	61.081	22.421	96.971	9.628	199.347	6.427	138.812	22.928	6	6-
344148	NCKAP5	230	63	636	62	603	49	395	37	546	43	574	80	-11.1028	-3.08786	73.6357	9.39498e-18	1.02709e-15	6.51424e-21	2.65196e-92	3.65844e-91	3.1076e-68	3.25602e-121	1.26001e-90	3.032	0.79	9.178	0.822	8.376	0.887	7.985	0.605	9.417	0.707	12.002	1.721	6	6-
729238	SFTPA2	240778	102598	378019	35348	187291	68646	207486	46468	302041	13414	213733	52381	-4.78023	-2.36221	44.0286	3.23615e-11	1.09736e-09	0	0	0	0	0	0	4644.47	2145	6476.85	780.593	3771.72	1838.62	4880.85	1253.89	7374.24	303.523	7438.05	1871.81	6	6-
8727	CTNNAL1	1274	552	2738	678	1948	499	1830	345	1110	415	2230	683	-9.6418	-1.74506	27.4679	1.59724e-07	2.69286e-06	1.5805e-55	3.0638e-193	3.74906e-124	3.42317e-211	9.38501e-87	9.35049e-186	21.129	9.937	40.457	12.88	33.701	11.5	36.933	8.015	23.354	8.101	66.905	21.056	6	6-
2920	CXCL2	4886	397	1946	282	3353	234	853	310	1587	65	4100	210	-9.37556	-3.41627	84.1406	4.6081e-20	7.06014e-18	0	9.90438e-224	0	1.02394e-46	0	0	183.229	16.065	65.583	12.108	129.963	12.199	38.263	16.089	74.902	2.883	276.43	14.61	6	6-
170689	ADAMTS15	629	206	848	160	879	198	769	169	352	113	179	39	-10.7651	-1.98837	34.4762	4.31492e-09	9.92007e-08	1.81064e-44	4.71433e-80	5.95992e-66	4.00119e-78	4.10599e-34	8.82122e-22	4.193	1.495	5.016	1.222	6.14	1.834	6.29	1.587	2.988	0.885	2.165	0.484	6	6-
3036	HAS1	1679	29	226	10	1885	56	381	104	873	83	141	7	-10.5782	-4.13231	108.494	2.09499e-25	6.97996e-23	0	1.30591e-43	0	1.57063e-31	1.77014e-181	1.45044e-32	32.817	0.615	3.941	0.224	38.383	1.521	9.04	2.843	21.624	1.911	4.981	0.254	6	6-
9079	LDB2	1666	475	3758	591	2687	318	2970	580	1912	373	1328	205	-9.45312	-2.45385	51.6525	6.62448e-13	3.04262e-11	3.67673e-138	0	0	0	5.88665e-279	9.68796e-198	28.027	8.685	56.359	11.392	47.171	7.439	60.83	13.696	40.891	7.397	40.502	6.424	6	6-
338328	GPIHBP1	262	37	1214	111	866	34	1885	95	746	32	201	13	-10.5742	-3.91368	108.858	1.7432e-25	6.0983e-23	8.35113e-40	2.02886e-180	3.76189e-162	0	8.58452e-192	2.01282e-43	4.665	0.715	19.27	2.264	16.077	0.841	40.804	2.368	16.844	0.671	6.472	0.43	6	6-
10435	CDC42EP2	986	176	1093	368	1635	222	1173	242	968	134	374	81	-10.2698	-2.33876	45.9857	1.19118e-11	4.45683e-10	6.9176e-126	1.57061e-49	2.51183e-188	1.35461e-125	9.43697e-173	2.52826e-44	20.555	3.978	20.338	8.787	35.488	6.432	29.652	7.05	25.56	3.291	14.087	3.138	6	6-
153579	BTNL9	779	219	2642	149	2636	40	1434	84	1853	142	757	84	-9.89694	-3.77627	101.361	7.66473e-24	2.15598e-21	2.17434e-66	0	0	7.94895e-287	0	1.37237e-133	8.642	2.641	26.052	1.894	30.578	0.617	19.447	1.309	26.131	1.852	15.216	1.733	6	6-
64236	PDLIM2	419	111	962	161	698	146	545	197	795	241	158	62	-10.7753	-1.84532	29.6735	5.11296e-08	9.49744e-07	9.11053e-39	1.06613e-99	5.64049e-57	1.84352e-30	1.74437e-80	3.32247e-10	28.447	8.167	59.064	12.528	48.977	13.788	44.003	18.529	68.33	19.489	19.418	7.873	6	6-
286133	SCARA5	1215	286	3306	489	1368	298	943	66	756	167	432	52	-10.0399	-2.63104	56.8891	4.61084e-14	2.62281e-12	4.12532e-123	0	3.7742e-106	2.70952e-179	3.97613e-101	2.32203e-74	11.23	2.875	27.14	5.178	13.233	3.827	10.672	0.858	8.889	1.814	7.239	0.894	6	6-
57519	STARD9	2177	511	4389	693	3315	498	2493	552	2515	1115	1708	493	-9.25982	-2.06488	37.5619	8.85573e-10	2.33814e-08	9.56829e-221	0	0	2.04287e-250	9.65045e-151	1.35367e-152	5.121	1.31	9.144	1.868	8.186	1.627	7.222	1.834	7.545	3.077	7.298	2.158	6	6-
6578	SLCO2A1	5433	1461	10572	1164	14813	1310	5787	2115	10399	3186	2466	477	-8.19761	-2.3108	45.2704	1.71625e-11	6.14746e-10	0	0	0	5.45820315549341e-310	0	8.77319975931247e-317	49.404	14.451	85.383	12.126	140.981	16.551	64.44	27.058	120.301	34.04	40.654	8.068	6	6-
5551	PRF1	1341	107	1104	181	2721	553	1513	621	1890	165	384	72	-9.91249	-2.58037	52.5424	4.21066e-13	1.99058e-11	1.79757e-254	1.80421e-116	1.55461e-225	4.40806e-66	0	1.08461e-50	22.909	1.875	15.847	3.349	45.907	12.412	29.768	14.171	48.904	3.964	11.193	2.156	6	6-
2294	FOXF1	400	119	1430	87	1357	70	1175	114	1184	54	381	48	-10.419	-3.4427	87.4513	8.63807e-21	1.4806e-18	4.57341e-32	1.59007e-246	1.97295e-237	4.87384e-198	3.10205e-300	3.03127e-64	6.248	2.018	19.894	1.557	22.121	1.519	22.353	2.496	23.472	0.993	10.77	1.394	6	6-
9467	SH3BP5	4859	1453	5266	1651	6077	1064	4306	1412	4835	2093	2580	956	-8.6795	-1.65469	24.9324	5.93754e-07	8.85779e-06	0	4.19347e-265	0	9.32729e-274	1.04896e-300	4.4849e-166	81.409	26.423	78.613	31.685	106.2	24.773	87.779	33.137	102.762	41.277	78.195	29.773	6	6-
83595	SOX7	1719	206	914	93	1202	65	750	81	2536	131	670	39	-10.1493	-3.64604	99.9361	1.57395e-23	4.29055e-21	5.2005e-276	1.08434e-129	1.29737e-207	1.7309e-121	0	1.93041e-146	21.018	2.737	9.938	1.303	15.36	1.104	11.2	1.391	39.401	1.883	14.838	0.887	6	6-
2034	EPAS1	45906	14606	100563	15573	108151	7796	70683	10411	127719	6968	33132	5678	-5.97345	-2.88218	66.3701	3.73732e-16	3.12535e-14	0	0	0	0	0	0	336.681	116.578	654.571	130.856	830.839	79.441	635.745	107.533	1192.46	60.021	440.764	77.469	6	6-
7869	SEMA3B	1906	555	5795	443	5877	515	2490	695	3426	333	924	243	-9.134	-2.64716	56.4881	5.65402e-14	3.15692e-12	1.16482e-153	0	0	2.90253e-196	0	9.39781e-92	32.205	8.092	91.213	6.784	82.464	9.562	45.622	18.995	69.825	5.225	22.481	6.925	6	6-
57188	ADAMTSL3	1506	377	3367	412	1899	168	1764	148	1552	703	1141	136	-9.70007	-2.68311	58.5173	2.01511e-14	1.22246e-12	1.26924e-143	0	1.54173e-275	2.69113614151808e-315	6.93655e-90	3.96335e-195	7.68	2.093	15.224	2.407	10.153	1.19	11.052	1.064	10.084	4.208	10.561	1.29	6	6-
28984	C13orf15	4185	1228	5569	765	9437	545	4648	723	7820	651	2887	535	-8.61486	-2.86189	66.1005	4.28512e-16	3.56923e-14	0	0	0	0	0	0	176.781	55.907	211.879	36.996	411.139	32.009	233.919	42.163	415.092	32.566	219.001	41.92	6	6-
8436	SDPR	6465	1761	11018	1046	11228	825	6339	559	11215	295	3797	625	-8.26777	-3.31283	83.1204	7.72044e-20	1.11794e-17	0	0	0	0	0	0	77.83	23.041	117.953	14.426	141.289	13.801	93.219	9.452	171.575	4.176	82.802	13.992	6	6-
57514	ARHGAP31	3732	1444	6578	1255	4878	1807	5369	1969	4764	2436	2907	760	-8.64332	-1.54821	21.7986	3.02815e-06	3.92109e-05	6.4648e-199	0	4.17882e-165	7.42786e-286	4.79573e-217	8.13694e-288	17.182	7.24	26.847	6.62	23.553	11.558	30.384	12.787	27.95	13.164	24.296	6.511	6	6-
26353	HSPB8	2694	1191	3292	615	4070	740	1912	581	3558	981	1891	390	-9.19107	-1.94581	33.5843	6.82421e-09	1.51293e-07	2.07422e-111	2.64734099957432e-310	0	2.44644e-135	0	4.15745e-231	54.429	26.093	59.348	14.232	85.639	20.778	46.867	16.41	91.073	23.349	69.043	14.642	6	6-
80177	MYCT1	326	114	992	254	618	139	1023	211	431	143	532	67	-10.6993	-2.03349	35.6914	2.31186e-09	5.62947e-08	1.88326e-21	7.07107e-68	7.01332e-47	9.88522e-110	1.70765e-39	1.25584e-88	4.204	1.598	11.381	3.753	8.328	2.491	16.104	3.82	7.061	2.169	12.425	1.607	6	6-
5797	PTPRM	3653	1002	7319	1553	4825	1294	5443	1803	5426	1700	3559	1197	-8.62049	-1.76626	28.2677	1.05646e-07	1.84179e-06	7.0389835227617e-315	0	3.34036e-288	0	0	8.74877e-263	50.136	14.309	74.268	21.706	67.393	29.778	77.205	29.636	84.713	23.125	57.295	23.735	6	6-
358	AQP1	19790	5311	46899	5254	41437	13582	23980	8750	27185	5036	13140	4140	-6.90991	-1.9919	34.3236	4.66686e-09	1.0694e-07	0	0	0	0	0	0	358.006	101.716	979.102	106.216	762.519	333.12	567.318	241.549	865.426	104.644	419.412	135.811	6	6-
57556	SEMA6A	1068	297	3001	510	3362	217	2103	294	2729	322	1350	120	-9.54563	-2.92132	68.7573	1.11356e-16	1.04814e-14	2.185e-91	2.08737e-306	0	2.01759e-296	0	1.63677e-260	5.84	1.768	14.552	3.195	19.272	1.648	14.124	2.266	19.009	2.067	13.397	1.221	6	6-
4248	MGAT3	522	95	2821	973	1682	139	1207	207	1799	61	494	76	-10.1774	-2.86129	62.4656	2.71138e-15	1.89706e-13	9.03157e-66	1.50536e-120	2.41287e-251	1.30811e-149	0	5.32468e-74	4.093	0.811	19.638	8.742	13.813	1.514	11.603	2.285	17.956	0.562	7.026	1.109	6	6-
23266	LPHN2	3262	1320	7799	1478	6656	725	8632	1299	8241	1248	5612	690	-8.6382	-2.52923	53.663	2.38005e-13	1.1727e-11	1.86285e-160	0	0	0	0	0	21.558	9.496	45.729	11.191	46.09	6.657	70.003	12.095	69.352	9.685	67.288	8.484	6	6-
745	C11orf9	1410	647	5834	2466	5485	1177	2094	216	3676	340	2097	247	-9.24147	-2.35391	44.2018	2.96204e-11	1.01259e-09	1.99212e-54	7.68128e-157	0	0	0	0	10.566	4.826	42.191	20.66	39.383	11.154	24.561	2.945	52.461	2.722	26.126	3.147	6	6-
84701	COX4I2	239	45	592	71	636	26	476	72	326	32	157	23	-11.4961	-3.09824	72.9813	1.30884e-17	1.40885e-15	1.10197e-29	1.94618e-77	2.29806e-118	3.63633e-64	9.57263e-68	7.75178e-25	20.964	4.201	47.692	7.123	56.406	3.174	47.963	8.5	35.338	3.36	24.413	3.728	6	6-
1958	EGR1	32908	3303	39627	11673	26958	6100	10739	2353	15163	6166	15307	1869	-7.33908	-2.23999	42.4379	7.29615e-11	2.36116e-09	0	0	0	0	0	0	414.024	45.158	443.446	168.24	354.43	106.64	164.966	41.566	242.379	91.224	348.791	43.725	6	6-
9022	CLIC3	572	135	1670	90	1355	191	1080	225	1541	326	200	32	-10.4838	-2.65561	57.3622	3.62505e-14	2.09614e-12	1.71901e-58	7.44081e-298	1.00474e-152	6.00358e-115	1.21953e-212	5.97709e-30	38.178	9.646	101.451	6.874	92.279	17.734	84.197	20.449	128.085	25.919	23.806	3.954	6	6-
2823	GPM6A	379	56	1639	103	1089	48	665	49	918	10	1138	45	-10.6729	-4.2219	121.784	2.57416e-28	1.22799e-25	9.16346e-55	9.11532e-280	2.07478e-198	1.43127e-124	2.85662e-275	5.49319e-271	9.976	0.876	40.335	4.084	23.041	2.484	17.861	0.989	21.185	0.169	44.152	1.764	6	6-
85450	ITPRIP	5195	1120	2547	515	4898	1283	2393	832	3447	770	1023	429	-9.29082	-1.85851	30.5505	3.25288e-08	6.25256e-07	0	2.96803e-223	1.99964e-302	1.40554e-139	0	3.80592e-54	45.583	10.69	19.846	5.177	44.987	15.641	25.719	10.273	38.482	7.938	16.275	7.002	6	6-
10186	LHFP	2253	1011	4148	820	3353	616	3084	908	2760	891	1620	272	-9.40857	-1.94337	33.4205	7.42392e-09	1.63e-07	2.59598e-90	0	8.82748e-306	1.55192e-227	1.00953e-257	1.75648e-229	42.558	20.716	69.878	17.742	66.002	16.171	70.755	23.996	66.084	19.821	55.323	9.549	6	6-
116159	CYYR1	918	297	2060	389	1057	338	1661	451	831	295	1042	232	-10.2288	-1.82946	29.8674	4.62637e-08	8.65485e-07	1.78596e-65	7.51139e-193	1.50687e-48	3.61176e-135	8.7719e-70	7.08846e-120	11.722	4.121	23.398	5.69	14.103	5.997	25.891	8.085	13.48	4.43	24.096	5.508	6	6-
5175	PECAM1	16094	4870	22873	6084	27405	5322	26975	8453	21479	4012	12917	2951	-7.4159	-1.99486	35.3389	2.77038e-09	6.6155e-08	0	0	0	0	0	0	88.39	29.122	111.403	38.284	157.784	40.609	181.967	65.451	150.277	25.868	128.748	30.155	6	6-
6274	S100A3	69	20	123	26	136	19	155	35	309	21	329	18	-12.2564	-2.79161	55.8338	7.88659e-14	4.26648e-12	1.33072e-06	5.62772e-11	6.5541e-16	6.01024e-16	1.24351e-71	6.71861e-74	5.349	1.655	8.719	2.306	10.707	2.049	13.914	3.672	29.712	1.944	45.343	2.581	6	6-
4929	NR4A2	4714	983	3317	474	3936	430	5276	304	1049	350	3068	327	-9.30003	-2.82033	64.7062	8.69395e-16	6.83468e-14	0	0	0	0	1.05465e-94	0	51.878	11.761	32.447	5.976	45.297	6.575	70.987	4.702	14.676	4.528	61.178	6.693	6	6-
65009	NDRG4	313	91	1603	128	2024	111	488	34	1149	323	254	30	-10.6084	-3.02003	70.2485	5.22842e-17	5.25094e-15	2.36725e-26	2.50334e-251	0	7.54644e-93	1.27655e-124	2.57293e-44	3.845	1.215	17.514	1.801	25.987	1.895	7.322	0.587	17.936	4.666	5.652	0.685	6	6-
79739	TTLL7	190	87	379	82	200	57	193	37	308	100	296	43	-11.8085	-1.94292	31.6854	1.81282e-08	3.63776e-07	1.85993e-08	4.19237e-32	6.8846e-12	8.23108e-23	1.59061e-29	1.6085e-46	2.028	1.01	3.595	1.003	2.232	0.845	2.519	0.555	4.179	1.254	5.725	0.853	6	6-
27063	ANKRD1	231	12	1211	122	2976	14	194	15	638	18	784	17	-10.6578	-4.85677	142.241	8.61257e-33	6.95299e-30	7.54422e-51	8.79672e-172	0	1.26834e-36	9.15506e-175	2.9378e-203	4.835	0.272	22.626	2.925	64.855	0.407	4.924	0.439	16.915	0.444	29.65	0.661	6	6-
22885	ABLIM3	887	213	2322	495	1552	406	1596	485	1274	166	640	200	-10.1616	-2.04186	36.0063	1.96684e-09	4.82289e-08	1.6133e-88	3.47785e-193	2.56829e-96	1.77257e-113	5.79208e-233	9.15571e-53	7.865	2.055	18.285	5.029	14.405	5.002	17.333	6.051	14.373	1.729	10.289	3.299	6	6-
115330	GPR146	327	93	1110	133	630	51	582	135	819	48	197	41	-11.0606	-2.76621	59.6506	1.13287e-14	7.20574e-13	2.82412e-28	4.36306e-144	3.39986e-95	8.21807e-57	1.96456e-196	9.21799e-25	7.838	2.415	23.778	3.651	15.7	1.699	16.872	4.514	24.835	1.357	8.524	1.826	6	6-
11170	FAM107A	8447	730	5335	591	10533	213	3339	196	6592	97	1131	74	-8.86913	-4.32769	128.978	6.85736e-30	4.23341e-27	0	0	0	0	0	3.01617e-240	102.25	9.649	57.369	8.201	133.783	3.584	49.744	3.613	102.184	1.382	24.975	1.743	6	6-
90627	STARD13	1635	410	2421	639	1830	412	1506	592	1651	546	1316	386	-9.89647	-1.75669	27.7851	1.35564e-07	2.3134e-06	2.90386e-155	1.2976e-157	8.6167e-137	2.39082e-71	4.00888e-150	6.82589e-116	10.983	3.394	14.429	4.918	12.879	3.845	12.412	5.602	17.306	5.803	16.037	4.824	6	6-
57381	RHOJ	998	256	1681	383	1056	285	1605	439	926	254	742	111	-10.3201	-2.03274	36.1842	1.79517e-09	4.43824e-08	4.58524e-93	5.51682e-131	4.62429e-63	1.8421e-129	9.06736e-103	7.4511e-113	22.029	6.124	33.136	9.683	24.256	8.743	42.916	13.532	25.878	6.608	29.583	4.552	6	6-
7051	TGM1	165	51	471	82	1484	99	182	65	416	33	187	16	-11.3086	-2.74936	56.7166	5.03375e-14	2.84028e-12	1.44846e-13	3.95334e-48	2.64033e-240	7.3683e-11	8.54523e-93	3.71413e-37	2.374	0.797	6.031	1.351	22.291	1.979	3.192	1.312	7.598	0.558	4.87	0.428	6	6-
6440	SFTPC	103463	42144	382577	11343	281282	81584	293621	58284	504527	5481	152371	18327	-4.91967	-3.13147	66.7222	3.12602e-16	2.64577e-14	0	0	0	0	0	0	6068.81	2624.39	20277	760.698	16935	6636.83	20352.5	4611.28	36155.7	374.199	15598.4	1942.39	6	6-
55422	ZNF331	4700	1067	1921	403	4349	444	4604	656	1570	619	2577	626	-9.32901	-2.27188	44.5844	2.43622e-11	8.4803e-10	0	1.13589e-162	0	0	1.68345e-113	3.08139e-274	47.93	11.832	17.407	4.708	46.396	6.291	57.441	9.406	20.36	7.419	47.63	11.873	6	6-
10391	CORO2B	342	151	614	196	491	117	555	83	548	102	202	58	-11.2466	-1.93196	31.8477	1.66746e-08	3.38491e-07	2.99413e-15	3.66541e-31	2.69687e-35	2.19579e-75	5.12714e-83	4.90631e-19	4.109	1.972	6.56	2.698	6.166	1.953	8.145	1.401	8.367	1.441	4.396	1.296	6	6-
3949	LDLR	9938	2756	5014	1491	6163	1737	2339	1008	5996	1271	2314	937	-8.77484	-1.65381	24.5369	7.29001e-07	1.06558e-05	0	1.51508e-274	0	1.20652e-91	0	4.66424e-129	96.783	29.278	43.424	16.647	62.882	23.526	27.937	13.871	74.617	14.584	41.039	17.044	6	6-
25928	SOSTDC1	141	51	1556	39	862	1	437	0	1114	4	1044	63	-10.8176	-5.64405	158.127	2.90392e-36	3.38629e-33	1.61601e-09	0	5.63964e-207	1.63924e-119	0	1.63469e-226	3.155	1.237	31.095	0.999	20.068	0.031	11.842	0	31.554	0.105	42.189	2.619	6	6-
5239	PGM5	883	304	2204	509	1478	327	1035	234	855	433	639	286	-9.78567	-1.64594	24.4009	7.82318e-07	1.13404e-05	1.1809e-57	5.84161e-169	9.71115e-113	1.68746e-102	1.95647e-40	1.97058e-30	10.762	4.013	23.837	7.1	18.809	5.532	15.372	3.981	13.168	6.184	14.029	6.449	6	6-
57493	HEG1	8385	2162	12941	2424	12075	2776	10684	4365	11467	4478	5456	852	-7.64592	-1.92914	32.8749	9.82823e-09	2.10076e-07	0	0	0	0	0	0	33.997	9.548	46.503	11.261	51.358	15.637	53.271	24.972	59.261	21.308	40.164	6.428	6	6-
2353	FOS	34884	5605	84219	25247	28567	9495	6266	1402	18703	5398	22919	3407	-6.49768	-2.07066	37.2382	1.04544e-09	2.71246e-08	0	0	0	0	0	0	666.64	116.185	1435.47	552.635	568.835	252.166	145.411	37.478	453.008	121.494	791.767	121.003	6	6-
161198	CLEC14A	1483	480	5682	639	3574	453	5423	820	2259	391	1548	305	-8.86549	-2.52155	53.9938	2.01122e-13	1.00513e-11	5.41608e-105	0	0	0	0	2.14448e-196	26.94	9.461	92.023	13.296	67.677	11.436	119.721	20.848	52.029	8.363	50.848	10.298	6	6-
244	ANXA8L2	90	24	121	21	363	15	66	15	100	0	103	12	-12.076	-3.15087	65.0007	7.48706e-16	5.97541e-14	5.10809e-09	4.99911e-13	3.06133e-67	2.32922e-07	5.52824e-31	2.0954e-18	7.815	2.263	9.216	2.085	33.211	1.805	7.057	1.819	10.982	0	16.107	1.922	6	6-
79987	SVEP1	4817	1538	8773	2374	7525	1362	6354	1952	4437	2194	3556	492	-8.18853	-1.88256	31.3753	2.12671e-08	4.21924e-07	0	0	0	0	9.61894e-217	0	14.358	4.995	23.166	8.108	23.54	5.64	23.312	8.215	16.864	7.673	19.25	2.729	6	6-
2313	FLI1	1917	459	3182	716	2110	541	2712	1194	2186	594	1133	425	-9.16036	-1.73609	26.9384	2.1004e-07	3.47693e-06	6.88796e-191	2.62686e-250	2.4109e-134	2.37483e-101	4.00949e-244	4.02756e-72	28.441	6.371	27.864	11.761	29.014	10.172	69.24	32.269	62.207	7.914	20.385	7.831	6	6-
255877	BCL6B	966	264	1926	401	1368	233	3223	512	1128	433	1243	141	-9.53215	-2.26561	44.0884	3.1388e-11	1.06608e-09	4.03397e-84	2.35445e-164	8.8879e-134	0	4.44047e-85	1.71158e-217	10.637	3.16	18.852	5.059	15.753	3.565	43.391	7.923	15.791	5.605	24.801	2.888	6	6-
2215	FCGR3B	2275	88	1592	370	1204	189	1803	201	1444	175	117	22	-9.75428	-2.95472	66.8304	2.95898e-16	2.51739e-14	0	2.83822e-121	2.64354e-125	2.33783e-286	4.53831e-273	4.37635e-16	41.327	1.722	25.658	7.685	22.769	4.759	39.611	5.04	32.823	3.713	3.793	0.734	6	6-
4239	MFAP4	9660	3230	23786	3604	16146	3082	12013	2752	16390	1481	6805	637	-7.40244	-2.56719	54.2492	1.76609e-13	8.95415e-12	0	0	0	0	0	0	227.956	82.565	501.456	97.398	396.241	104.126	343.001	90.588	489.28	41.195	289.852	27.919	6	6-
142683	ITLN2	80	7	603	27	580	1	311	12	397	0	337	15	-11.1406	-5.2606	153.367	3.18526e-35	3.18375e-32	4.67886e-15	6.44926e-113	7.82535e-138	8.80563e-69	5.87569e-123	3.72585e-79	3.289	0.31	22.305	1.271	24.611	0.057	15.252	0.681	20.507	0	24.874	1.143	6	6-
57608	KIAA1462	2296	975	6544	1629	5655	977	7070	1477	8256	2070	4931	709	-8.25187	-2.09751	38.5311	5.38868e-10	1.47085e-08	2.32954e-103	0	0	0	0	0	9.161	4.237	23.14	7.447	23.669	5.416	34.691	8.315	41.987	9.692	35.721	5.264	6	6-
3726	JUNB	23929	2419	16733	3668	17217	3532	9477	3192	12097	3321	2784	666	-7.40799	-2.16229	40.3024	2.17546e-10	6.35974e-09	0	0	0	0	0	1.9286e-300	552.937	60.564	345.442	97.075	413.802	113.431	265.046	102.94	353.759	90.466	116.16	28.592	6	6-
10044	SH2D3C	1530	316	3754	490	5374	424	3450	1001	4005	309	945	180	-8.92256	-2.74662	60.9959	5.71943e-15	3.83549e-13	6.18197e-174	0	0	5.46215e-259	0	2.60358e-123	25.074	5.622	54.809	9.199	91.878	9.656	68.814	22.983	83.273	5.96	28.018	5.484	6	6-
199675	C19orf59	852	143	3625	94	3967	519	1892	62	3453	208	1128	334	-9.21371	-3.54059	88.7276	4.53104e-21	8.12876e-19	5.12793e-113	0	0	0	0	3.45984e-98	29.152	5.285	111.333	3.683	140.486	24.686	77.635	2.942	148.904	8.412	69.468	21.212	6	6-
177	AGER	3740	413	12668	649	20577	536	9491	512	16609	52	9964	775	-7.67292	-4.54439	138.404	5.94477e-32	4.62151e-29	0	0	0	0	0	0	310.1	39.679	931.592	62.293	1867.76	62.146	1054.79	67.306	1949.57	5.189	1653.31	128.534	6	6-
79683	ZDHHC14	244	111	410	174	319	75	401	159	370	102	166	34	-11.0615	-1.60576	22.3666	2.25262e-06	3.00206e-05	1.42528e-10	5.21855e-12	1.5024e-23	3.38728e-19	2.1525e-41	3.1827e-21	8.562	1.9	16.036	7.71	16.485	3.642	16.418	6.589	11.554	2.538	4.581	0.94	6	6-
2890	GRIA1	712	286	1718	106	1235	27	1579	71	1201	6	973	62	-9.92703	-4.30032	116.05	4.63398e-27	1.87053e-24	2.38213e-36	9.22253e-295	5.29247e-256	0	0	2.92829e-208	5.657	2.194	10.763	1.362	9.105	0.275	15.376	0.849	11.691	0.05	12.446	0.814	6	6-
10272	FSTL3	2601	756	2252	576	6215	709	2154	850	2992	550	665	117	-8.98612	-2.15602	39.7952	2.82035e-10	8.12061e-09	3.85954e-210	1.87422e-152	0	4.58694e-101	0	1.62631e-91	41.609	13.129	32.086	10.555	103.743	15.761	41.955	19.053	60.729	10.354	19.246	3.479	6	6-
6330	SCN4B	960	362	2399	253	1846	169	1879	108	1175	174	1596	182	-9.59625	-2.98598	70.4383	4.74886e-17	4.79223e-15	2.28275e-54	0	8.31847e-264	0	4.93349e-202	5.77755e-278	9.6	3.936	23.69	2.898	19.312	2.763	40.986	2.363	33.055	2.571	28.927	3.385	6	6-
3909	LAMA3	3066	1163	7229	2295	5635	696	3446	562	3838	1229	4191	506	-8.48004	-2.18779	41.0561	1.47922e-10	4.47389e-09	3.67737e-169	0	0	0	0	0	22.813	9.419	47.764	19.566	43.908	7.196	31.437	5.892	36.372	10.746	56.592	7.008	6	6-
342510	CD300E	1563	104	506	122	1851	258	890	289	605	82	789	139	-10.0284	-2.58231	53.4816	2.61031e-13	1.27716e-11	6.31399226548947e-314	6.61258e-38	3.55866e-209	4.75127e-58	1.14233e-108	1.4266e-108	17.312	1.252	4.982	1.548	21.439	3.971	12.051	4.498	8.519	1.068	15.834	2.863	6	6-
1636	ACE	2605	430	4477	713	3467	750	4337	822	4647	541	1405	463	-8.79709	-2.38326	48.0719	4.10867e-12	1.64897e-10	0	0	1.94844e-269	0	0	5.53926e-107	38.889	7.011	68.745	12.94	52.686	15.138	86.976	20.244	86.075	9.254	42.728	12.546	6	6-
55679	LIMS2	1684	270	4132	358	7317	408	2474	462	3134	540	415	82	-8.94458	-2.89845	68.2128	1.46767e-16	1.36312e-14	1.31522e-229	0	0	1.02298e-286	0	8.9406e-53	47.921	8.313	105.288	11.667	216.06	16.138	84.833	18.293	112.643	18.138	21.292	4.333	6	6-
80274	SCUBE1	425	43	1040	125	1006	117	428	83	819	64	186	9	-10.5331	-3.22594	78.8412	6.73071e-19	8.775e-17	1.04479e-74	1.44329e-134	2.44485e-127	1.81991e-48	6.94019e-182	4.38755e-43	4.238	0.466	9.214	1.428	10.496	1.621	5.223	1.164	10.387	0.75	3.362	0.167	6	6-
2949	GSTM5	248	111	514	155	319	65	604	130	410	92	294	29	-10.9133	-2.08857	36.3678	1.63383e-09	4.08264e-08	4.27342e-11	1.34165e-28	3.51685e-27	4.91358e-63	1.82017e-54	3.19842e-55	6.825	3.305	12.653	4.884	9.115	2.486	20.05	4.978	14.248	2.986	14.582	1.481	6	6-
3164	NR4A1	18448	5264	17280	1973	30767	2075	14312	674	9488	1873	8761	771	-7.28646	-3.14117	77.7859	1.14836e-18	1.4014e-16	0	0	0	0	0	0	558.288	217.382	319.302	80.514	1154.25	114.972	743.102	31.727	785.471	100.604	271.434	24.548	6	6-
64321	SOX17	371	42	191	40	399	39	257	63	776	63	143	9	-11.1296	-2.99942	66.9711	2.75515e-16	2.3897e-14	5.00488e-62	6.71172e-17	5.55667e-56	4.1099e-24	8.72794e-171	3.12633e-31	6.434	0.791	2.952	0.795	7.216	0.94	5.421	1.53	17.069	1.286	4.486	0.29	6	6-
9314	KLF4	6720	989	7519	1086	7662	490	2818	296	5038	468	4180	383	-8.37385	-3.23442	83.9101	5.17797e-20	7.81911e-18	0	0	0	0	0	0	90.455	14.463	90.055	16.746	107.734	9.165	46.28	5.591	86.132	7.409	101.878	9.586	6	6-
4881	NPR1	1517	278	4550	316	3782	1181	2183	327	2328	272	622	132	-9.14064	-2.63796	56.3547	6.05073e-14	3.35105e-12	3.65722e-189	0	5.75193e-179	1.1865e-294	0	6.39137e-75	13.91	2.773	37.057	3.32	36.296	15.047	24.511	4.218	27.157	2.931	10.34	2.251	6	6-
79927	GRRP1	249	39	128	28	142	21	151	52	117	8	91	11	-11.9658	-2.5746	48.9068	2.68425e-12	1.12236e-10	1.22138e-35	3.06703e-11	2.64586e-16	1.27809e-09	3.02682e-27	4.59154e-16	6.927	1.174	3.188	0.892	4.1	0.812	5.064	2.014	4.112	0.263	4.565	0.568	6	6-
2264	FGFR4	1220	266	3709	388	2969	185	1351	217	1949	49	367	19	-9.46142	-3.51145	89.9494	2.44324e-21	4.62014e-19	1.22984e-132	0	0	5.53815e-175	0	1.87554e-83	19.558	4.635	53.137	7.128	49.606	4.124	26.352	4.89	39.776	0.928	10.682	0.568	6	6-
25890	ABI3BP	3938	1552	5856	1159	3637	969	4666	1592	3575	571	3621	524	-8.5471	-2.05066	36.2954	1.69565e-09	4.22705e-08	4.47324e-203	0	1.63448e-219	2.03969e-279	0	0	33.651	14.428	44.434	11.347	32.537	11.505	48.848	19.146	38.873	5.732	56.107	8.329	6	6-
25959	KANK2	3695	2296	10065	1614	9863	2475	6328	2273	5428	2247	4544	1337	-8.5932	-1.59782	22.9781	1.63858e-06	2.2421e-05	1.86646e-55	0	0	0	0	0	28.799	19.526	69.508	14.418	80.748	26.806	62.86	25.09	54.082	20.563	64.472	19.426	6	5-
3142	HLX	329	74	1144	166	894	171	1063	324	556	307	308	61	-10.8618	-1.99491	34.1904	4.99755e-09	1.13896e-07	2.06857e-35	9.37937e-132	3.11471e-79	1.226e-75	2.74542e-22	8.79764e-40	5.824	1.421	18.051	3.366	16.5	4.206	22.876	8.029	12.481	6.398	9.86	2.007	6	5-
8061	FOSL1	2238	140	75	100	574	51	191	26	598	97	268	34	-11.0678	-2.68372	49.7265	1.76747e-12	7.64931e-11	0	0.000965216	1.67716e-83	8.01624e-28	2.70515e-98	3.3787e-45	57.796	3.914	1.732	2.958	15.4	1.831	5.956	0.936	19.524	2.955	12.487	1.631	6	5-
2828	GPR4	506	72	568	97	668	137	544	253	541	210	291	35	-11.181	-2.14301	37.982	7.14017e-10	1.91164e-08	1.47647e-74	1.43662e-58	1.16077e-55	1.42893e-18	1.2291e-40	2.82252e-50	6.547	1.012	6.538	1.438	9.03	2.463	8.591	4.595	8.892	3.195	6.818	0.842	6	5-
710	SERPING1	23632	8898	26672	6721	32309	7772	17105	12632	15510	7762	8319	2685	-7.41171	-1.38682	17.4423	2.96161e-05	0.000305465	0	0	0	1.94054e-66	0	0	551.734	225.072	556.39	179.716	784.497	252.189	483.242	411.542	458.231	213.646	350.68	116.46	6	5-
9732	DOCK4	3500	1548	5545	1731	2898	1187	3997	1736	3955	1518	3692	1461	-9.05816	-1.30369	15.7905	7.07581e-05	0.000667811	2.74889e-144	5.43418e-281	2.57396e-77	2.10186e-153	5.71247e-296	1.68268e-213	15.621	7.525	21.937	8.852	13.565	7.36	21.93	10.93	22.495	7.952	29.913	12.133	6	5-
395	ARHGAP6	148	75	455	109	419	73	378	79	425	64	205	30	-11.6474	-2.17656	38.9252	4.4035e-10	1.21458e-08	2.32894e-05	3.81717e-34	6.40327e-41	1.05133e-40	1.05758e-72	2.8668e-32	4.048	2.22	11.14	3.415	11.899	2.776	12.471	3.009	14.69	2.066	10.113	1.524	6	5-
4023	LPL	2161	1278	5413	656	4707	1643	3567	897	4607	1201	3533	953	-9.12609	-1.81522	28.7507	8.23212e-08	1.46063e-06	4.98042e-40	0	7.883e-181	6.98226184198788e-316	0	0	22.406	14.408	49.873	7.792	51.05	23.67	45.24	13.075	60.739	14.635	66.386	18.377	6	5-
192668	CYS1	143	51	423	61	363	118	274	90	446	284	134	12	-11.6726	-1.83722	27.7044	1.41342e-07	2.4081e-06	7.72763e-10	1.56966e-49	5.19022e-17	5.34676e-18	1.4897e-12	2.40527e-26	2.106	0.816	5.546	1.029	5.581	2.415	4.918	1.859	8.338	4.921	3.572	0.329	6	5-
10610	ST6GALNAC2	746	597	1079	297	1015	273	436	134	813	121	581	185	-10.7107	-1.64613	23.3231	1.36949e-06	1.90368e-05	0.00556668	6.09711e-67	3.62648e-61	3.83301e-31	9.71714e-140	7.71989e-47	14.669	12.731	18.928	6.689	20.791	7.46	10.406	3.685	20.257	2.803	20.649	6.76	6	5-
83849	SYT15	128	23	569	71	243	27	346	99	318	30	155	22	-11.8391	-2.72961	57.496	3.38666e-14	1.9637e-12	2.1968e-17	1.38821e-72	2.2638e-32	5.91867e-27	3.02056e-67	6.07966e-25	4.638	2.496	21.254	3.301	12.487	2.889	14.842	4.929	14.346	3.035	16.063	3.614	6	5-
8613	PPAP2B	6923	1643	9774	3147	6525	2051	4116	2429	4589	2377	3843	964	-8.6685	-1.47376	19.59	9.5972e-06	0.000111173	0	0	1.15392e-304	4.54311e-63	2.42927e-203	0	81.732	21.083	102.602	42.562	80.528	33.645	59.37	40.282	68.854	32.994	82.19	21.164	6	5-
84913	ATOH8	853	653	3520	224	3436	168	1685	174	2799	163	925	341	-9.8435	-2.93862	60.6489	6.82193e-15	4.47476e-13	0.00013884	0	0	8.9593e-277	0	2.11245e-60	5.486	4.572	20.085	1.651	23.158	1.501	13.301	1.577	22.925	1.231	10.794	4.08	6	5-
7975	MAFK	2207	920	1273	475	2288	618	1292	643	1809	752	532	231	-9.97959	-1.30158	15.6514	7.61548e-05	0.00071234	3.67668e-103	4.23978e-47	6.50586e-136	6.96094e-36	7.18343e-121	6.52771e-27	31.281	14.22	15.964	7.715	34.08	12.168	22.597	12.889	32.73	12.497	13.706	6.095	6	5-
10742	RAI2	420	130	1027	146	981	189	547	192	660	231	348	214	-10.9213	-1.72976	25.9671	3.47291e-07	5.50994e-06	2.97688e-32	3.48318e-120	1.93865e-86	7.90913e-32	9.88088e-57	1.07443e-07	10.14	3.401	22.107	4.038	24.659	6.344	15.995	7.522	20.139	6.566	15.151	9.587	6	5-
2357	FPR1	2614	212	1019	199	1946	488	835	446	1146	204	153	56	-10.3157	-2.08762	35.3067	2.81655e-09	6.70287e-08	0	7.23076e-93	6.69071e-128	3.48969e-19	2.56029e-177	6.17854e-11	96.605	9.32	33.813	8.899	74.37	25.07	36.929	22.803	53.276	8.909	13.067	5.558	6	5-
5732	PTGER2	577	145	234	78	294	75	231	112	353	168	141	52	-11.6474	-1.47742	19.1648	1.19905e-05	0.000135458	1.09255e-55	7.84823e-12	7.99869e-20	1.38404e-07	1.04704e-19	4.8653e-10	9.358	2.553	3.381	1.449	4.975	1.69	4.561	2.545	7.264	3.207	4.137	1.568	6	5-
6403	SELP	1211	248	2268	309	1155	310	862	504	659	214	481	186	-10.4185	-1.76696	26.9039	2.13832e-07	3.53691e-06	1.91954e-138	3.3288e-271	1.17746e-69	1.30688e-14	1.1986e-61	1.14776e-29	14.979	3.334	24.951	4.379	14.931	5.328	13.021	8.754	10.358	3.113	10.776	4.278	6	5-
11099	PTPN21	1423	824	4461	1127	3174	633	2816	630	3374	914	2609	547	-9.43267	-1.86335	30.7624	2.91641e-08	5.6681e-07	1.17418e-28	6.40944e-306	6.32439e-268	1.83786e-280	0	1.05609734282676e-314	8.626	5.437	23.986	7.827	20.164	5.331	20.955	5.382	26.048	6.505	28.696	6.169	6	5-
6515	SLC2A3	12126	1422	5562	1288	8093	3269	5745	1482	7022	1992	6673	2758	-8.49701	-1.87621	30.4768	3.37877e-08	6.47674e-07	0	0	5.66558e-222	0	0	0	120.895	15.53	49.119	14.721	85.022	45.278	70.795	20.984	89.959	23.361	121.742	51.502	6	5-
23135	KDM6B	9834	2451	2075	1007	4682	1123	3011	1062	3990	1130	1615	460	-9.06822	-1.66903	24.9699	5.82332e-07	8.71215e-06	0	4.01221e-37	0	2.18723e-171	0	2.37803e-146	55.076	14.946	10.306	6.462	27.488	8.738	20.711	8.385	28.466	7.43	16.415	4.793	6	5-
104	ADARB1	911	438	2082	338	2080	304	1005	378	872	345	524	136	-10.4015	-1.81657	28.9835	7.2996e-08	1.30621e-06	7.72875e-32	1.30514e-220	7.86277e-228	5.95898e-52	4.04946e-63	7.01498e-53	21.377	11.071	44.479	9.086	50.004	9.934	27.699	12.184	25.71	9.677	22.122	5.953	6	5-
4005	LMO2	446	278	1048	349	1111	253	894	286	722	252	656	252	-10.7646	-1.45147	19.1	1.24042e-05	0.000139456	1.43233e-07	1.52373e-48	2.15741e-82	1.53246e-59	5.46188e-62	9.93106e-41	13.412	9.041	28.24	12.019	34.644	10.576	32.352	11.956	27.407	8.949	35.551	14.071	6	5-
23604	DAPK2	1151	715	1996	471	2459	313	1023	208	1356	330	896	346	-10.222	-1.8715	30.3565	3.59503e-08	6.87246e-07	3.88526e-18	5.17456e-149	1.44878e-294	5.38001e-111	2.30617e-167	1.81841e-54	17.605	11.875	27.186	8.253	39.257	6.653	19.062	4.46	26.325	5.939	24.802	9.839	6	5-
57520	HECW2	883	456	2024	556	1708	401	1801	562	3383	1314	1274	418	-9.9503	-1.55343	22.0593	2.64358e-06	3.47022e-05	7.19006e-26	2.83637e-125	1.34904e-121	3.46293e-123	4.5661e-249	5.98476e-98	4.78	2.688	9.717	3.449	9.694	3.016	11.976	4.29	23.332	8.351	12.517	4.21	6	5-
28514	DLL1	558	167	643	246	443	209	630	133	378	127	236	78	-11.296	-1.56404	21.5561	3.43621e-06	4.40868e-05	4.06272e-44	4.48002e-23	1.17123e-08	1.46142e-66	2.9583e-34	8.20375e-19	6.498	2.114	6.658	3.282	5.393	3.382	8.965	2.176	5.595	1.739	4.979	1.689	6	5-
8825	LIN7A	68	24	144	32	97	39	135	34	147	44	86	11	-12.7932	-1.88248	28.0014	1.21229e-07	2.09259e-06	2.86246e-05	2.26767e-12	0.0010238	1.34257e-12	7.99664e-16	7.9119e-15	2.547	0.97	4.848	1.372	3.755	2.031	6.048	1.763	6.931	1.949	5.792	0.765	6	5-
8692	HYAL2	5872	1352	5896	1113	10336	1149	4854	1872	6492	1180	578	407	-8.92755	-1.98153	32.9	9.7021e-09	2.08015e-07	0	0	0	9.15405e-237	0	4.16393e-07	137.021	34.229	123.374	29.759	250.529	37.288	136.98	61.174	192.405	32.581	24.445	17.712	6	5-
4792	NFKBIA	15756	3777	8860	2621	15039	2444	5509	3675	8044	1875	5093	1342	-8.33904	-1.81415	28.5904	8.9424e-08	1.57599e-06	0	0	0	4.79015e-46	0	0	434.633	112.748	218.767	82.799	430.643	93.708	183.246	141.121	280.352	61.038	253.354	68.751	6	5-
57576	KIF17	154	45	246	53	305	57	142	32	177	33	46	13	-12.3789	-2.09878	35.4093	2.67208e-09	6.41728e-08	1.86016e-13	2.08344e-21	1.70359e-28	1.07483e-14	1.70997e-27	5.76324e-05	7.714	1.285	8.802	2.195	14.186	4.3	6.896	3.735	12.395	1.358	4.292	1.327	6	5-
9590	AKAP12	7994	1456	3957	1834	5825	1435	4357	1083	4650	1599	3774	299	-8.9991	-2.0761	36.2446	1.74041e-09	4.33347e-08	0	1.15481e-81	0	0	0	0	37.784	7.495	16.581	9.932	28.873	9.423	25.311	7.22	28.007	8.871	32.381	2.63	6	5-
653	BMP5	469	526	1088	313	510	164	579	204	704	150	600	95	-10.9568	-1.57568	20.8601	4.94072e-06	6.08036e-05	0.00994986	1.04236e-63	6.18124e-24	7.21721e-34	7.53579e-97	3.49444e-88	8.736	10.629	18.071	6.678	9.9	4.245	13.101	5.317	16.623	3.29	20.205	3.289	6	5-
1316	KLF6	13384	3358	9775	5054	9913	2114	4592	1653	8798	3219	8193	1469	-8.37357	-1.72553	26.3887	2.79173e-07	4.51105e-06	0	1.23653e-133	0	2.2779e-252	0	0	303.752	51.696	153.025	83.793	203.566	60.407	126.087	49.055	225.414	48.052	167.938	27.049	6	5-
5468	PPARG	597	241	1210	364	913	268	585	327	795	272	501	186	-10.8096	-1.3985	17.7468	2.52347e-05	0.000265103	2.0125e-30	8.22773e-66	1.8354e-48	6.08733e-12	4.42179e-70	7.34552e-33	15.63	6.831	30.264	10.914	24.829	9.752	18.49	11.927	26.311	8.401	23.664	9.045	6	5-
135932	TMEM139	181	102	714	229	516	169	349	38	493	54	517	135	-11.3917	-1.99719	32.4651	1.21352e-08	2.55229e-07	7.34067e-05	1.19403e-35	2.32774e-23	2.87441e-56	2.07889e-97	7.22847e-52	3.065	1.875	10.775	4.442	9.114	3.977	7.19	0.901	10.591	1.077	15.838	4.25	6	5-
7145	TNS1	19235	12383	53512	11288	32304	11794	28687	6842	33383	7874	16305	4604	-7.17042	-1.68086	25.1284	5.36368e-07	8.09954e-06	1.97234e-241	0	0	0	0	0	69.257	48.572	170.731	46.569	122.036	58.996	127.069	34.769	153.23	33.268	106.603	30.848	6	5-
79652	TMEM204	409	197	997	120	1999	221	571	220	1406	470	178	37	-10.723	-2.04119	34.9411	3.3983e-09	8.00565e-08	9.47404e-15	1.75589e-129	4.9175e-260	1.09399e-28	1.82784e-126	1.84574e-22	21.999	11.384	48.537	7.387	110.329	16.531	36.249	16.23	94.625	30.02	17.136	3.688	6	5-
55711	FAR2	333	118	249	134	239	76	434	119	235	113	171	66	-11.8163	-1.35066	16.1893	5.73176e-05	0.000554167	1.52912e-21	0.000578466	7.07885e-12	1.07708e-35	6.51434e-13	3.00946e-11	6.122	2.352	4.077	2.821	4.581	1.941	9.697	3.058	5.471	2.444	5.678	2.253	6	5-
115361	GBP4	5214	778	3270	1122	6636	809	3503	2571	3568	596	4459	728	-9.1394	-2.15217	37.4981	9.15017e-10	2.40679e-08	0	7.49985e-141	0	3.84166e-15	0	0	31.902	5.182	17.747	7.865	42.554	6.877	26.313	22.168	27.803	4.281	49.502	8.287	6	5-
64115	C10orf54	3973	834	6161	1316	6097	1393	3044	1423	4005	684	1140	447	-9.22529	-1.89383	31.1761	2.35652e-08	4.64444e-07	0	0	0	1.39464e-98	0	1.14494e-67	31.793	7.262	43.768	12.065	51.09	15.488	29.856	16.031	40.789	6.43	16.544	6.654	6	5-
55273	TMEM100	225	118	2131	203	6502	54	1398	28	4606	36	1113	72	-9.84107	-4.64239	120.928	3.96187e-28	1.77529e-25	2.9659e-07	0	0	0	0	3.82869e-237	6.198	3.371	63.102	9.808	246.754	1.981	60.771	1.029	187.708	1.121	61.895	4.002	6	5-
1960	EGR3	1850	346	1336	360	1109	299	2454	200	632	452	986	120	-10.3267	-2.18098	38.7746	4.7567e-10	1.30685e-08	1.16312e-226	3.08574e-85	2.13081e-66	0	8.55574e-12	4.26372e-167	18.718	3.807	12.011	4.173	11.738	4.203	30.378	2.845	8.132	5.375	18.081	2.258	6	5-
590	BCHE	324	232	1200	133	764	133	633	78	586	76	765	51	-11.0825	-2.65714	54.0322	1.97228e-13	9.88024e-12	0.0029775	3.07982e-162	1.0611e-73	3.32632e-96	6.0078e-108	1.83797e-161	5.334	4.146	17.601	2.508	13.121	3.043	12.683	1.799	12.24	1.473	22.785	1.561	6	5-
27233	SULT1C4	152	232	377	81	304	63	262	53	269	56	208	19	-11.9565	-1.96538	29.4726	5.67125e-08	1.03965e-06	7.02076e-06	4.52721e-32	9.60332e-26	5.00722e-29	1.28961e-38	2.41848e-40	3.937	6.505	8.733	2.403	8.179	2.268	8.194	1.913	8.808	1.711	9.719	0.914	6	5-
6926	TBX3	322	217	1926	237	1987	242	2178	267	2292	218	824	92	-10.3072	-2.69758	56.8722	4.65076e-14	2.63836e-12	0.000234901	2.08535e-245	1.68477e-244	0	0	4.29708e-145	6.254	3.312	19.838	7.181	28.048	9.108	41.843	5.479	33.451	3.55	26.605	5.387	6	5-
54491	FAM105A	1120	1614	2839	784	2639	512	1451	624	2353	615	1307	484	-9.89317	-1.36384	16.0029	6.3244e-05	0.000602583	8.23234e-28	1.19516e-173	6.60314e-229	1.87591e-57	3.07035e-272	1.91565e-84	5.94	9.321	13.352	4.764	14.674	3.773	9.454	4.666	15.899	3.829	12.581	4.776	6	5-
316	AOX1	1559	655	2789	759	1522	548	1432	645	895	399	561	67	-10.2162	-1.59874	22.5082	2.09248e-06	2.80467e-05	4.30746e-72	4.08168e-174	1.87045e-55	2.43624e-51	5.59095e-54	1.328e-95	12.009	5.49	19.069	6.698	12.278	5.865	13.523	6.995	8.775	3.61	7.837	0.96	6	5-
2532	DARC	6252	616	3410	540	3795	759	1791	1218	1094	308	611	136	-9.66502	-2.11796	36.8736	1.26041e-09	3.21457e-08	0	0	0	6.38842e-14	1.43918e-118	8.43308e-71	286.983	30.444	141.202	28.376	179.374	48.444	97.655	77.026	63.018	16.757	50.314	11.576	6	5-
3340	NDST1	6306	3889	15016	3701	8408	3033	10070	2692	7230	2690	4662	2009	-8.44262	-1.41536	18.3766	1.81269e-05	0.000196835	9.91006e-97	0	4.66675e-301	0	0	1.1049e-231	29.28	19.666	61.808	19.689	40.942	19.565	57.47	17.63	42.779	14.66	39.294	17.357	6	5-
4818	NKG7	421	60	558	108	1515	124	859	529	1066	73	236	62	-10.9622	-2.51493	47.9752	4.31638e-12	1.72573e-10	1.88858e-62	1.02875e-51	1.40786e-227	9.43893e-12	9.59571e-246	3.42481e-24	27.438	4.188	33.078	8.054	100.817	11.242	65.474	46.988	86.569	5.665	27.442	7.481	6	5-
5320	PLA2G2A	281	77	448	82	693	163	611	426	567	155	359	24	-11.3295	-2.04391	33.5838	6.82583e-09	1.51293e-07	4.85774e-25	8.47463e-44	7.96274e-50	0.000120682	1.67669e-63	1.48138e-76	18.15	5.327	26.313	6.061	45.715	14.645	46.175	37.512	45.643	11.919	41.377	2.87	6	5-
1464	CSPG4	1486	367	2721	347	2269	411	1820	381	1833	1387	527	147	-10.0698	-1.95933	33.0134	9.15279e-09	1.97651e-07	5.61632e-144	0	7.74517e-210	2.10065e-192	5.20438e-25	1.97955e-49	6.663	1.792	10.816	1.783	10.671	2.56	10.033	2.41	10.475	7.3	4.29	1.227	6	5-
4242	MFNG	836	200	1244	390	1441	366	1205	737	1246	229	319	129	-10.5656	-1.65311	23.6868	1.13357e-06	1.59889e-05	7.10512e-84	1.94505e-63	2.93643e-93	1.28876e-16	4.75375e-189	1.85357e-18	21.246	7.521	31.371	9.643	39.939	10.501	37.232	21.293	41.293	6.788	11.78	4.858	6	5-
11080	DNAJB4	980	430	1260	458	820	301	783	332	756	666	929	158	-10.6235	-1.29356	14.9648	0.000109534	0.000986321	5.96783e-42	2.94365e-49	3.45112e-29	2.66761e-32	7.80087e-05	6.98096e-131	17.856	8.501	20.469	9.559	15.574	7.622	17.338	8.466	17.465	14.289	30.608	5.351	6	5-
9413	FAM189A2	902	661	2534	523	2097	216	1320	147	1215	139	1394	381	-10.242	-2.33558	43.7815	3.67154e-11	1.23305e-09	2.18815e-06	3.55503e-218	2.62412e-283	4.83739e-210	6.24076e-236	2.11041e-132	18.265	14.514	45.787	12.13	44.222	6.078	32.427	4.161	31.169	3.316	51.011	14.337	6	5-
81575	APOLD1	3537	538	1784	356	2546	490	2570	315	1018	787	1322	74	-9.95664	-2.45168	47.5339	5.40605e-12	2.10525e-10	0	1.04213e-158	1.42513e-222	0	4.7245e-13	1.03399e-292	29.62	4.902	13.265	3.416	22.323	5.701	26.371	3.713	11.626	7.742	20.075	1.153	6	5-
84617	TUBB6	6760	980	3902	661	4049	980	3016	1451	3364	1310	1907	376	-9.32806	-1.98648	34.0376	5.40567e-09	1.22137e-07	0	0	9.59618e-277	1.20758e-90	1.62671e-246	3.39441e-241	155.111	24.365	79.984	17.371	96.641	31.252	83.769	46.47	97.692	35.434	79.014	16.029	6	5-
3851	KRT4	441	156	976	663	1104	175	578	8	803	41	838	38	-10.9254	-3.14353	63.0321	2.03365e-15	1.45192e-13	4.25728e-28	0.00596199	1.2396e-114	1.67187e-144	1.99183e-199	3.67726e-194	8.477	3.253	16.734	14.598	22.111	4.675	13.491	0.215	19.563	0.928	29.119	1.358	6	5-
56099	PCDHGB7	458	149	729	186	425	116	767	187	634	315	333	173	-11.0498	-1.53601	21.1432	4.26212e-06	5.32194e-05	8.25688e-33	2.26093e-50	1.89157e-25	2.53231e-70	1.25362e-31	9.50052e-12	7.153	2.526	10.133	3.327	6.929	2.517	14.588	4.09	12.556	5.786	9.404	5.019	6	5-
5155	PDGFB	913	190	1572	498	1812	227	1422	689	1973	445	827	128	-10.1778	-2.09928	37.2819	1.0223e-09	2.66228e-08	1.0508e-103	1.85232e-78	3.53463e-219	1.88943e-42	1.41306e-258	2.1429e-123	15.896	3.59	24.393	9.931	32.896	5.492	30.107	16.796	43.565	9.121	26.041	4.142	6	5-
1675	CFD	4302	634	10393	724	6011	581	2961	1786	3437	729	238	56	-9.08654	-2.49721	49.1311	2.39416e-12	1.01522e-10	0	0	0	9.35262e-42	0	5.80931e-27	172.229	27.372	374.404	33.185	248.438	32.339	141.487	98.835	173.048	34.544	17.122	4.159	6	5-
8862	APLN	182	23	811	73	322	36	1639	77	671	389	583	85	-10.9602	-2.89896	63.1173	1.94759e-15	1.39522e-13	5.21938e-29	2.25668e-121	1.89141e-42	0	1.08234e-23	7.78867e-90	2.211	0.304	8.762	1.016	4.089	0.608	24.32	1.314	10.359	5.557	12.829	1.92	6	5-
3373	HYAL1	496	155	994	221	1444	65	477	109	621	255	422	542	-10.7896	-1.8413	26.5302	2.59445e-07	4.22479e-06	1.89496e-37	8.10979e-80	1.98424e-262	2.50555e-47	4.04566e-43	0.000183392	23.719	8.104	42.408	12.122	72.334	4.324	28.017	7.406	38.173	14.411	36.954	48.619	6	5-
56704	JPH1	209	310	427	98	295	107	287	79	406	105	274	58	-11.5712	-1.49663	18.4256	1.76666e-05	0.000192436	7.5312e-07	9.33562e-34	1.74445e-11	8.85173e-24	1.91274e-48	9.76457e-34	1.836	2.963	3.331	0.986	2.713	1.306	3.088	0.977	4.538	1.084	4.364	0.948	6	5-
65055	REEP1	231	299	551	115	383	117	265	39	310	68	272	73	-11.5459	-1.7201	23.9552	9.86038e-07	1.40413e-05	0.000425199	2.15648e-47	1.6693e-19	4.88626e-37	6.43257e-42	3.42272e-27	2.739	3.853	5.809	1.562	4.747	1.928	3.839	0.65	4.671	1.13	5.842	1.61	6	5-
126326	GIPC3	252	104	720	140	409	76	487	146	295	174	144	52	-11.4494	-1.63234	23.2926	1.39137e-06	1.93027e-05	4.7082e-13	3.35781e-66	6.41117e-38	8.07084e-36	1.88811e-10	1.56843e-10	2.245	1.008	5.695	1.429	3.814	0.941	5.313	1.83	3.343	1.821	2.325	0.861	6	5-
51232	CRIM1	6286	2212	11238	3345	6778	1924	6963	2385	6534	2731	4378	2773	-8.49504	-1.38406	17.6449	2.66229e-05	0.000278572	0	0	0	0	0	5.0895e-77	42.28	16.194	67.066	25.777	47.765	17.979	57.464	22.6	55.96	21.571	53.422	34.699	6	5-
5997	RGS2	11854	1709	4552	1328	5140	1103	5593	664	2293	1648	5831	729	-8.79946	-2.19294	39.8527	2.73856e-10	7.9068e-09	0	7.34723e-257	0	0	9.0526e-39	0	387.551	60.377	133.499	49.716	174.047	50.129	219.565	30.132	94.536	63.661	343.28	44.244	6	5-
283298	OLFML1	702	297	1503	354	1074	303	1160	459	771	541	624	99	-10.4824	-1.55947	21.5294	3.48437e-06	4.46502e-05	1.36074e-32	4.38295e-113	2.06538e-60	1.56843e-54	4.80487e-15	1.2807e-91	9.549	4.389	18.193	5.516	15.26	5.727	19.25	8.762	13.32	8.656	15.369	2.504	6	5-
7433	VIPR1	593	418	3470	338	9741	204	2371	153	6819	264	772	308	-9.31089	-3.24445	68.537	1.24517e-16	1.16679e-14	1.18611e-05	0	0	0	0	1.20627e-44	8.426	6.451	43.886	5.502	144.538	4.028	41.079	3.05	123.032	4.413	19.858	8.137	6	5-
201294	UNC13D	2448	692	4410	1479	4249	930	2111	1257	3519	476	967	311	-9.41873	-1.76143	26.7373	2.33084e-07	3.82819e-06	4.54444e-204	9.15574e-198	0	1.13114e-31	0	3.68658e-76	21.334	6.56	34.129	14.767	38.763	11.261	22.535	15.415	39.021	4.874	15.28	5.041	6	5-
79686	C14orf139	419	90	708	147	509	117	441	174	222	146	303	62	-11.3423	-1.76584	26.8554	2.19259e-07	3.62097e-06	1.16277e-46	1.21268e-61	1.11959e-37	2.4886e-21	2.85825e-06	3.26856e-38	5.88	1.372	8.842	2.363	7.459	2.281	7.546	3.425	3.956	2.41	7.697	1.618	6	5-
374378	GALNTL4	1113	667	2492	547	2892	943	2363	482	2259	770	948	382	-9.74027	-1.57687	22.3563	2.26469e-06	3.0144e-05	4.0573e-20	2.58016e-201	4.07687e-127	7.23595e-255	3.42295e-198	9.23988e-54	17.755	11.552	35.41	9.996	48.139	20.905	45.897	10.775	45.729	14.456	27.364	11.329	6	5-
255743	NPNT	4462	2430	11589	3452	7466	844	5651	1351	6269	678	5245	878	-8.58564	-2.22719	41.2516	1.33841e-10	4.09523e-09	1.8523e-107	0	0	0	0	0	41.562	24.744	95.852	36.869	73.037	10.932	64.983	17.893	74.959	7.436	89.312	15.303	6	5-
2624	GATA2	421	212	1334	227	1667	369	1019	167	1262	96	532	82	-10.5041	-2.40122	46.7289	8.15161e-12	3.07738e-10	9.6318e-14	2.00419e-136	6.95649e-127	4.20853e-130	9.01279e-283	1.27523e-79	5.586	3.071	15.706	3.453	23.223	6.806	16.675	3.143	21.437	1.498	12.87	2.031	6	5-
221692	PHACTR1	272	64	540	92	421	236	409	100	344	79	284	77	-11.433	-1.88557	29.8608	4.64196e-08	8.67629e-07	1.43634e-28	1.20999e-55	0.000251738	3.23723e-38	3.87561e-45	4.47976e-28	5.22	1.332	9.244	2.022	8.419	6.294	9.531	2.684	8.367	1.786	9.853	2.746	6	5-
283755	HERC2P3	255	80	1039	237	449	171	1162	669	99	50	119	55	-11.0258	-1.30657	15.0294	0.000105849	0.000956011	1.43347e-19	1.91862e-81	2.18902e-15	2.11423e-20	9.51424e-06	4.59199e-06	4.353	1.489	15.542	4.627	8.106	4.041	24.77	16.168	2.155	0.992	3.683	1.738	6	5-
863	CBFA2T3	541	156	826	206	672	166	731	378	667	127	235	81	-10.9383	-1.74015	26.2939	2.93219e-07	4.71622e-06	5.01094e-45	1.2348e-58	2.15392e-45	1.09835e-18	1.67398e-99	9.3055e-18	5.48	1.724	7.416	2.392	7.149	2.337	9.132	5.422	8.635	1.51	4.332	1.529	6	5-
8642	DCHS1	3055	880	5987	1204	4093	1114	5349	1943	3291	2562	878	226	-9.08353	-1.5896	22.6399	1.95384e-06	2.63229e-05	4.40055e-249	0	1.40737e-239	9.51948e-290	4.37091e-38	4.79243e-89	10.493	3.293	18.22	4.738	14.751	5.316	22.605	9.42	14.411	10.326	5.476	1.445	6	5-
5187	PER1	7566	8142	7654	1002	12160	2211	6677	1304	7147	1940	1422	416	-8.44971	-1.87282	29.4955	5.6048e-08	1.02926e-06	1.31289e-16	0	0	0	0	1.19841e-125	61.322	71.8	55.074	9.304	103.198	24.898	66.323	14.878	73.72	18.47	20.901	6.272	6	5-
157310	PEBP4	556	263	2301	167	986	253	1263	510	545	183	851	164	-10.4193	-1.9521	32.1104	1.45654e-08	3.01141e-07	9.57369e-21	0	2.38681e-63	5.32138e-57	2.56618e-49	4.43938e-110	31.906	16.198	119.701	10.968	57.97	20.192	85.296	40.061	39.082	12.481	87.321	17.435	6	5-
10203	CALCRL	1273	779	4218	967	2985	548	2523	1041	3609	693	3841	515	-9.3688	-1.93461	31.9192	1.60718e-08	3.28158e-07	3.23576e-21	0	7.48877e-273	2.61031e-108	0	0	9.688	6.451	28.491	8.431	23.791	5.794	23.541	11.155	34.96	6.194	53.016	7.291	6	5-
285313	IGSF10	769	549	2246	265	1322	80	1429	126	858	68	886	121	-10.3384	-2.94541	64.7084	8.68422e-16	6.83468e-14	1.47474e-06	1.03986e-292	9.95873e-221	8.22953e-251	2.32113e-190	9.91391e-142	14.41	11.218	37.237	5.69	26.033	2.082	33.042	3.339	20.523	1.494	30.178	4.221	6	5-
8839	WISP2	225	35	1283	125	1522	209	521	112	356	500	132	18	-10.8869	-2.25221	38.4289	5.67845e-10	1.53993e-08	3.3262e-32	1.54498e-184	8.14587e-174	2.8001e-54	0.000740188	9.04127e-22	6.988	1.175	35.72	4.446	48.995	9.023	19.456	4.833	13.952	18.341	7.386	1.038	6	5-
7481	WNT11	144	81	263	37	210	43	164	34	148	59	62	13	-12.2744	-1.9127	29.5493	5.45125e-08	1.00467e-06	0.000338595	1.79356e-31	1.91892e-18	3.51752e-18	1.04523e-11	3.28669e-08	3.136	1.912	5.115	0.923	4.76	1.302	4.328	1.034	4.081	1.514	2.439	0.526	6	5-
29995	LMCD1	1617	755	2765	540	2744	419	1929	650	2359	682	1116	224	-9.51072	-1.93417	32.9488	9.46168e-09	2.03484e-07	9.06284e-60	1.16027e-250	3.77708e-291	4.25482e-118	6.59791e-248	1.68062e-139	39.333	19.892	60.12	15.044	69.388	14.166	56.734	22.051	72.587	19.562	49	10.122	6	5-
4739	NEDD9	716	409	445	163	499	80	417	99	1034	131	267	57	-10.8082	-1.98044	32.6478	1.10465e-08	2.35157e-07	1.01504e-15	8.36242e-18	9.44178e-52	5.86598e-40	4.7356e-192	1.13098e-32	144.236	85.09	86.601	37.477	96.907	22.486	88.602	25.271	247.269	32.481	92.429	21.031	6	5-
2719	GPC3	2458	1885	7153	717	5379	555	3741	418	3180	276	2199	341	-8.9278	-2.7324	57.6993	3.05417e-14	1.78075e-12	6.03729e-11	0	0	0	0	0	53.038	44.77	137.2	17.762	122.395	16.671	100.355	12.97	89.028	7.043	87.638	13.888	6	5-
6401	SELE	6728	110	760	89	372	190	778	151	573	189	1413	62	-9.8358	-2.9505	59.4578	1.24946e-14	7.87574e-13	0	3.70582e-100	1.19681e-05	6.04009e-88	3.04018e-53	0	67.278	1.196	6.752	1.02	3.892	2.64	9.52	2.123	7.287	2.221	25.61	1.153	6	5-
2791	GNG11	612	315	1513	332	1422	274	1833	417	869	325	2087	207	-9.94776	-2.01892	34.9348	3.40938e-09	8.02275e-08	2.16853e-18	9.8066e-123	2.38235e-124	1.26353e-179	2.44541e-68	0	31.916	17.657	71.368	19.818	76.151	19.871	112.975	29.855	56.74	20.119	194.902	20.007	6	5-
145781	GCOM1	117	59	676	98	1019	34	698	32	735	23	532	53	-10.8656	-3.54724	84.912	3.11948e-20	4.92316e-18	0.00011374	1.45713e-78	5.74151e-197	1.01953e-148	1.95749e-198	3.5374e-98	4.098	2.233	22.098	5.101	40.686	2.053	29.564	1.565	32.522	0.95	45.633	6.56	6	5-
8685	MARCO	4518	447	8111	564	9430	1193	5023	873	4735	466	2028	1103	-8.62031	-2.80879	61.2372	5.05952e-15	3.42579e-13	0	0	0	0	0	1.48203e-59	103.011	11.044	165.199	14.728	223.663	37.804	138.647	27.784	136.643	12.524	83.499	46.724	6	5-
57463	AMIGO1	145	62	422	177	285	99	258	109	257	78	87	36	-11.5701	-1.3297	15.5275	8.13158e-05	0.000755898	1.32498e-07	1.22451e-12	5.20427e-12	1.9649e-11	2.05514e-26	1.54932e-05	2.344	1.088	6.078	3.278	4.807	2.224	5.078	2.469	5.272	1.484	2.545	1.082	6	5-
169611	OLFML2A	1011	387	3804	666	1612	265	1688	352	1764	1451	761	137	-9.7714	-1.88832	30.6782	3.04575e-08	5.90853e-07	8.0357e-56	0	6.07081e-162	7.8612e-179	1.77098e-15	3.38593e-103	5.796	2.415	19.34	4.374	9.686	2.111	11.883	2.844	12.881	9.765	7.917	1.461	6	5-
57572	DOCK6	3016	1476	5593	1713	5837	1556	5022	1919	4321	1629	1415	559	-8.87514	-1.42275	18.7343	1.50257e-05	0.000165646	1.48691e-98	1.80975e-292	0	5.63473e-249	0	1.31554e-82	17.715	9.439	29.138	11.528	35.935	12.698	36.219	15.887	32.327	11.234	15.082	6.109	6	5-
9429	ABCG2	520	126	1125	276	352	160	368	58	244	111	286	66	-11.097	-1.8131	28.155	1.11977e-07	1.94731e-06	4.19457e-52	1.41238e-80	7.05669e-08	1.29605e-48	3.33514e-15	8.43888e-33	4.489	1.183	8.625	2.73	3.181	1.919	3.892	0.705	2.68	1.126	4.477	1.06	6	5-
29094	HSPC159	896	717	1574	496	844	265	683	266	1640	617	1110	236	-10.1684	-1.40402	17.6648	2.63455e-05	0.000275944	0.00216278	3.16529e-79	2.99044e-40	1.88547e-33	1.12021e-126	1.13416e-132	9.043	7.869	14.114	5.735	8.911	3.716	8.434	3.775	21.049	7.318	20.304	4.43	6	5-
8654	PDE5A	1231	866	4348	1024	1746	505	1943	691	1921	502	2328	354	-9.54329	-1.71411	25.646	4.10147e-07	6.34881e-06	1.14943e-10	0	4.98959e-94	2.71636e-109	1.56037e-222	0	7.085	5.285	21.613	8.145	10.259	3.933	13.376	5.46	13.716	3.303	23.68	3.692	6	5-
6586	SLIT3	4990	1103	9647	2093	5731	1413	6031	3036	4551	1969	1523	187	-8.65897	-1.89232	31.0137	2.5621e-08	5.02603e-07	0	0	0	2.91223e-159	1.29207e-283	2.86341e-256	35.09	8.442	60.198	16.862	42.219	13.805	52.023	30.072	40.745	16.261	19.428	2.446	6	5-
1524	CX3CR1	121	174	828	182	856	105	821	95	639	493	447	210	-10.7995	-1.51516	18.33	1.85754e-05	0.000200934	0.000706474	1.44004e-67	3.70854e-105	6.51631e-128	1.29606e-08	1.77272e-19	6.518	3.713	25.585	3.057	31.329	5.777	77.909	6.288	46.199	19.975	27.219	8.277	6	5-
80014	WWC2	2240	1644	4921	1466	2798	928	3530	992	3810	986	4041	738	-9.06759	-1.63149	23.5057	1.24544e-06	1.74511e-05	5.68966e-14	8.35618e-269	3.19824e-119	1.10372e-275	0	0	13.195	10.561	25.648	9.895	17.321	7.594	25.659	8.264	28.65	6.81	43.269	8.092	6	5-
4162	MCAM	4506	1132	6530	1702	6760	1858	8932	3335	3062	2597	1682	358	-8.65472	-1.57697	22.1614	2.50664e-06	3.30674e-05	0	0	0	0	2.35436e-21	3.70795e-201	53.058	14.488	68.368	22.959	83.212	30.4	128.502	55.163	45.823	35.953	35.879	7.839	6	5-
2013	EMP2	14345	8598	37102	7334	29342	6555	24532	1465	26443	9473	22620	4602	-7.14351	-2.11799	37.5185	9.05491e-10	2.38472e-08	2.82966e-245	0	0	0	0	0	105.165	68.597	241.401	61.601	225.32	66.768	220.559	15.126	246.788	81.565	300.798	62.763	6	5-
221749	C6orf145	1744	478	2075	482	2338	703	1304	634	1881	719	874	269	-9.80038	-1.59978	23.1137	1.52697e-06	2.10172e-05	5.2099e-151	1.13193e-157	2.99159e-118	1.42554e-38	4.62558e-142	1.32401e-72	32.417	9.639	34.392	10.262	45.292	18.159	29.446	16.489	44.322	15.738	29.372	9.293	6	5-
9592	IER2	5075	744	5074	1601	5635	1458	2976	1842	4221	2107	2350	966	-8.87534	-1.50836	20.1106	7.30915e-06	8.62875e-05	0	5.64347e-253	0	2.81208e-37	4.10612e-202	1.02208e-127	100.726	16.014	89.848	36.396	116.496	40.216	71.682	51.118	106.152	49.261	84.298	35.63	6	5-
8404	SPARCL1	20484	8944	51698	11750	22231	7009	31163	6766	12027	8276	14927	2560	-7.11571	-1.67278	24.9041	6.02546e-07	8.96347e-06	0	0	0	0	2.4271e-236	0	288.104	137.372	646.442	189.462	327.951	137.05	538.811	134.774	216.638	137.132	383.091	67.33	6	5-
23764	MAFF	2665	429	572	337	2525	208	991	184	1651	244	890	137	-10.0205	-2.47402	48.8617	2.74665e-12	1.14617e-10	0	5.08474e-05	0	5.11385e-116	5.21412e-284	2.93661e-133	59.901	9.154	10.039	9.244	51.748	6.85	39.909	5.062	58.856	5.654	31.648	5.009	6	5-
79856	SNX22	404	138	414	94	643	53	372	204	378	43	182	69	-11.3065	-2.0532	33.749	6.27028e-09	1.40014e-07	3.02416e-27	2.27383e-33	3.8915e-97	2.22148e-08	3.44904e-74	3.10419e-12	4.442	1.654	4.022	1.184	7.433	0.809	5.048	3.168	5.298	0.554	3.632	1.41	6	5-
5581	PRKCE	1496	866	2029	563	3309	443	1179	464	2791	356	1455	336	-9.67614	-1.94745	32.1089	1.45764e-08	3.01141e-07	2.9593e-30	9.42195e-124	0	5.01765e-56	0	2.20318e-162	10.236	6.449	12.319	4.414	23.721	4.211	9.897	4.472	24.315	2.861	18.061	4.277	6	5-
4628	MYH10	10921	6825	21880	4629	17332	6022	12415	3961	12749	3852	7492	1406	-7.70737	-1.66579	24.7192	6.63202e-07	9.76885e-06	1.75454e-157	0	0	0	0	0	53.545	36.441	95.111	26.004	89.107	41.02	74.801	27.389	79.647	22.169	66.676	12.827	6	5-
81849	ST6GALNAC5	265	90	793	86	492	34	328	159	400	53	521	119	-11.1972	-2.40595	45.5635	1.47768e-11	5.38482e-10	1.93497e-18	6.70913e-109	1.28755e-79	1.97539e-10	1.15633e-73	4.48817e-59	5.378	1.981	14.361	1.999	10.399	0.959	8.076	4.511	10.284	1.267	19.108	4.488	6	5-
2995	GYPC	1183	263	1365	287	1250	314	904	475	616	248	476	147	-10.2836	-1.68617	25.1663	5.25926e-07	7.95331e-06	2.17357e-126	7.35078e-116	3.06791e-82	9.60545e-22	9.64643e-44	7.25741e-40	110.174	17.921	87.818	22.281	105.457	26.379	90.783	52.511	71.139	14.035	47.729	13.334	6	5-
58494	JAM2	305	149	753	157	629	130	663	177	505	222	465	81	-10.8586	-1.82077	28.9787	7.31793e-08	1.30726e-06	6.11141e-11	1.0182e-64	2.61837e-52	1.24161e-55	1.80831e-31	1.58755e-64	7.588	4.015	16.75	4.473	16.264	4.495	19.935	6.14	15.89	6.514	20.879	3.743	6	5-
3400	ID4	536	420	1590	394	1207	244	1298	212	1138	327	1049	257	-10.1421	-1.82314	28.7628	8.18076e-08	1.45397e-06	0.00919918	1.0569e-112	6.67011e-101	1.04083e-165	7.70741e-121	6.21942e-111	9.125	7.76	24.12	7.683	21.43	5.772	26.88	5.054	24.573	6.553	32.302	8.132	6	5-
9411	ARHGAP29	1740	1144	5238	1192	2785	686	3446	1107	3075	1434	3767	1081	-9.01772	-1.51187	20.7912	5.12166e-06	6.27576e-05	7.60944e-21	0	1.6027e-186	5.22271e-226	2.91494e-168	0	7.083	5.072	18.897	5.56	11.892	3.879	17.25	6.358	15.954	6.85	27.84	8.188	6	5-
10791	VAMP5	1811	533	1735	615	2728	959	1637	861	1674	486	863	349	-9.64537	-1.42254	18.3564	1.83207e-05	0.000198734	4.39446e-144	6.489e-71	1.19263e-103	1.3786e-38	1.86965e-175	1.23735e-48	155.074	48.606	136.327	60.234	236.404	114.275	161.29	99.347	177.281	49.798	131.082	55.232	6	5-
6615	SNAI1	534	59	361	92	252	56	311	149	199	106	114	18	-11.4908	-1.92295	30.0412	4.22961e-08	7.95515e-07	2.6548e-89	1.78085e-25	5.69291e-20	2.58786e-10	2.12085e-09	1.81824e-17	13.276	1.589	8.024	2.62	6.512	1.935	9.345	5.165	6.257	3.108	5.115	0.831	6	5-
6573	SLC19A1	441	168	486	125	619	111	337	169	292	123	88	41	-11.2036	-1.49316	19.5308	9.89928e-06	0.000114231	3.92678e-25	1.24927e-33	2.50716e-58	6.16167e-10	9.80152e-20	0.000124126	15.844	6.453	15.928	5.139	22.643	5.549	14.086	8.245	13.041	5.271	5.631	2.726	6	5-
54507	ADAMTSL4	773	224	2082	140	1293	514	953	211	1272	424	231	170	-10.1875	-1.81054	27.0584	1.97398e-07	3.2884e-06	1.2138e-63	0	9.09039e-38	2.62065e-96	1.00243e-114	0.00861779	34.614	10.329	64.668	9.794	63.392	31.061	45.254	12.5	55.529	17.197	25.927	27.445	6	5-
131583	FAM43A	731	102	1027	160	363	166	1254	260	328	145	207	50	-10.735	-1.98785	33.0754	8.86511e-09	1.92429e-07	1.10085e-108	1.60966e-112	5.63941e-08	3.78155e-134	6.90643e-21	5.14212e-23	9.051	1.373	11.31	2.27	4.697	2.856	18.962	4.521	5.161	2.111	4.642	1.151	6	5-
219539	YPEL4	128	27	120	27	180	59	79	34	114	70	49	16	-12.4042	-1.53743	19.1782	1.19067e-05	0.000134657	1.49022e-15	2.88883e-10	1.38241e-08	0.000565506	0.000196579	0.000146506	3.163	0.723	2.651	0.764	4.623	2.026	2.359	1.171	3.563	2.04	2.185	0.734	6	5-
115677	NOSTRIN	461	226	607	220	1397	266	717	102	542	62	473	197	-10.6402	-1.9529	31.834	1.67927e-08	3.39902e-07	6.88978e-16	2.576e-24	9.84194e-124	2.10688e-100	1.94197e-105	7.91203e-26	12.978	6.889	15.327	7.094	40.788	10.413	24.316	4.003	19.311	2.064	24.056	10.319	6	5-
21	ABCA3	17399	2921	36442	4553	27158	6236	22851	11211	30125	4707	6876	2372	-7.12581	-2.12164	37.9468	7.27004e-10	1.93898e-08	0	0	0	0	0	0	98.687	18.039	183.319	29.588	161.471	49.142	159.172	89.64	217.658	31.344	70.777	25.032	6	5-
3491	CYR61	15594	3111	14636	4776	28557	6190	8656	3549	8247	11324	10458	1162	-7.52241	-1.66134	22.8308	1.76911e-06	2.40659e-05	0	0	0	0	3.91227e-54	0	277.809	60.139	232.431	97.46	530.405	153.248	187.463	88.508	186.305	237.526	336.927	38.477	6	5-
9639	ARHGEF10	1604	850	3294	806	2758	548	2178	662	2366	821	1227	451	-9.41233	-1.62136	23.8529	1.03983e-06	1.47373e-05	7.18001e-43	1.66085e-235	6.49698e-234	3.31083e-154	1.77426e-202	1.47924e-80	10.855	6.261	19.78	6.25	19.556	5.153	18.085	6.312	20.389	6.525	15.065	5.678	6	5-
343413	FCRL6	137	48	115	31	358	50	271	134	297	37	128	40	-11.7799	-1.93748	30.1882	3.92086e-08	7.421e-07	1.20204e-09	3.56684e-08	3.75882e-41	1.79477e-08	3.73801e-56	2.89442e-11	2.955	1.122	2.215	0.766	8.038	1.499	7.084	4.038	8.113	0.941	4.988	1.603	6	5-
3563	IL3RA	668	188	1117	218	769	212	734	273	1115	117	192	104	-10.5365	-1.87688	29.5491	5.45174e-08	1.00467e-06	9.19273e-57	4.47577e-102	7.64845e-45	7.41769e-39	5.48272e-224	1.23098e-06	16.562	5.048	24.76	6.19	19.816	7.306	21.995	9.437	34.964	3.421	8.591	4.79	6	5-
2621	GAS6	4427	1825	8082	1176	6205	1746	5075	2041	6153	4043	1748	596	-8.51432	-1.51324	20.6437	5.53176e-06	6.74283e-05	5.52486e-210	0	0	3.00569e-228	3.75447e-143	3.04302e-127	126.178	56.275	206.269	38.385	183.51	69.171	174.289	80.938	221.499	136.019	89.822	31.545	6	5-
170575	GIMAP1	333	80	998	254	1270	215	886	477	771	180	362	102	-10.4986	-1.86526	30.0327	4.2483e-08	7.98316e-07	7.34867e-34	6.33675e-69	5.34195e-125	1.05486e-19	5.37469e-99	1.17668e-33	3.085	0.808	8.18	2.696	12.364	2.767	10.128	6.249	9.117	1.955	6.095	1.759	6	5-
6366	CCL21	3430	1197	4325	636	3083	505	1602	1815	440	69	581	256	-9.39126	-1.74781	24.7107	6.66129e-07	9.80509e-06	3.79936e-216	0	5.30544180707050e-310	2.4245e-10	2.17664e-74	1.48156e-28	204.321	76.482	233.77	43.357	187.975	41.84	112.109	147.813	32.726	4.888	61.846	28.245	6	5-
2999	GZMH	450	30	99	25	553	54	377	266	341	37	110	52	-11.4053	-2.2963	37.9495	7.26012e-10	1.9388e-08	5.88465e-91	9.01219e-08	7.30438e-77	0.00510193	8.70919e-68	1.91662e-05	21.057	1.509	4.167	1.338	26.662	3.51	20.958	17.087	19.955	2.046	9.201	4.497	6	5-
10398	MYL9	2708	1244	5055	1660	8288	1604	3433	1198	2785	2300	2414	449	-8.77756	-1.51131	20.3965	6.29443e-06	7.56443e-05	3.94941e-103	3.73287e-235	0	1.51867e-198	3.35527e-23	4.2954067249438e-319	282.561	138.551	514.959	169.912	767.476	190.485	493.42	229.458	429.079	248.684	421.413	81.341	6	5-
9934	P2RY14	282	125	465	96	195	62	246	58	229	45	237	81	-11.5264	-1.80077	27.6529	1.45155e-07	2.46904e-06	1.33948e-12	9.84983e-41	6.02664e-10	5.47572e-24	3.72697e-34	4.21701e-18	4.891	2.989	7.187	1.907	3.527	1.494	5.189	2.167	5.037	2.302	7.434	2.611	6	5-
54345	SOX18	110	53	833	117	807	98	872	338	612	172	139	27	-11.0577	-2.04396	34.6781	3.88987e-09	9.04189e-08	8.05408e-05	4.04846e-98	1.82199e-100	8.65983e-43	1.01902e-66	1.43112e-18	2.742	1.431	18.568	3.341	20.91	3.396	26.272	11.748	19.296	5.057	6.254	1.25	6	5-
5414	2011-09-04	377	195	544	211	923	236	453	187	544	268	269	85	-11.0308	-1.33213	16.1416	5.87782e-05	0.000566462	9.37459e-12	3.60254e-19	8.67083e-60	2.54937e-20	1.26885e-27	1.5582e-22	18.318	10.267	24.36	11.767	45.784	16.025	25.457	12.453	33.548	15.806	23.818	7.826	6	5-
125111	GJD3	484	168	497	189	683	160	522	332	483	246	247	96	-11.0748	-1.29397	15.0745	0.000103349	0.000935849	6.27402e-32	2.48708e-18	1.85543e-49	1.59803e-06	3.28263e-23	2.55374e-15	4.625	1.746	4.219	2.069	6.83	2.125	6.106	4.463	5.871	2.763	4.279	1.706	6	5-
2	A2M	175438	90773	295340	79401	214633	75787	199673	82371	124648	20863	103364	18777	-5.18702	-1.72881	26.139	3.17697e-07	5.06338e-06	0	0	0	0	0	0	1435.17	807.78	2144.13	744.097	1838.68	861.293	2002.01	948.148	1297.17	200.408	1532.77	285.616	6	5-
9496	TBX4	515	342	2607	355	1516	247	1480	282	1223	68	596	101	-10.2541	-2.47392	48.163	3.92211e-12	1.57711e-10	1.24482e-06	7.2532144307999e-312	1.30822e-153	2.06509e-169	4.00483e-297	5.39159e-84	8.444	6.087	38.08	6.667	25.931	5.628	29.534	6.478	25.441	1.312	17.679	3.078	6	5-
6867	TACC1	11791	5344	11011	5686	7625	2381	7423	2953	8002	3054	7228	2451	-8.17073	-1.30212	15.7263	7.32012e-05	0.000687766	0	3.28203e-151	0	0	0	0	73.729	36.377	61.078	40.736	49.966	20.685	56.975	26.021	63.724	22.423	82.007	28.514	6	5-
2324	FLT4	1004	248	2584	373	1941	304	2313	713	1999	352	525	191	-9.95806	-2.15236	39.8853	2.69317e-10	7.78645e-09	9.22894e-98	3.07116e-297	5.18155e-202	9.22858e-161	1.20614034929211e-310	1.86799e-35	12.569	4.861	30.4	6.491	40.764	11.352	29.874	11.37	26.087	5.415	17.459	14.692	6	5-
9638	FEZ1	59	17	109	19	89	14	103	27	110	39	41	8	-12.9417	-2.07145	32.3384	1.29528e-08	2.70258e-07	1.00143e-05	3.46669e-12	5.41181e-10	1.14127e-09	2.42081e-10	6.46973e-06	13.935	8.289	27.265	8.812	29.496	7.367	21.791	9.801	27.08	7.746	19.972	4.271	6	5-
80031	SEMA6D	75	37	242	26	71	26	162	39	82	16	137	26	-12.5505	-2.03828	32.006	1.53701e-08	3.15365e-07	0.00157855	4.35528e-34	0.00259116	7.82585e-16	1.60186e-12	1.31446e-18	2.633	1.376	8.549	2.264	2.744	1.073	5.787	1.609	3.282	1.063	7.822	1.433	6	5-
27289	RND1	1961	470	672	260	1433	113	152	256	994	336	1173	334	-10.389	-1.63274	20.9759	4.65089e-06	5.75942e-05	6.75912e-195	1.25228e-23	3.16344e-218	3.20185e-09	1.97494e-88	1.06395e-106	50.752	13.169	15.556	7.706	38.527	4.065	4.75	9.232	32.523	10.258	54.772	16.056	6	5-
11076	TPPP	2345	1315	3363	1140	1661	382	1350	182	2997	396	526	213	-9.72311	-1.88485	30.1129	4.0762e-08	7.68039e-07	5.85492e-52	4.30484e-148	6.17344e-121	1.34725e-194	0	4.46981e-30	14.648	8.942	18.635	8.159	10.873	3.315	10.351	1.602	23.842	2.904	5.962	2.475	6	5-
467	ATF3	5674	1276	1533	762	4388	498	969	132	1424	256	2894	293	-9.48687	-2.47235	49.7581	1.73922e-12	7.5426e-11	0	1.36839e-25	0	1.44799e-138	2.3047e-219	0	222.458	53.963	54.064	34.205	177.67	27.145	45.375	7.157	70.235	11.878	203.936	21.313	6	5-
361	AQP4	5727	3246	13799	1646	5853	226	8335	1674	7453	2066	16613	3495	-8.23714	-2.4353	47.85	4.60106e-12	1.83256e-10	7.93539e-121	0	0	0	0	0	54.788	27.576	110.85	22.39	50.733	4.79	135.687	24.384	104.665	18.02	223.781	48.284	6	5-
27143	KIAA1274	1320	356	2098	385	2399	421	2286	855	1899	394	688	342	-9.88908	-1.88648	31.0479	2.51733e-08	4.94282e-07	1.2502e-116	3.78363e-201	4.14305e-228	4.72406e-118	7.62655e-265	6.09409e-26	10.985	3.223	15.502	3.671	20.903	4.868	23.312	10.015	20.111	3.852	10.383	5.294	6	5-
168537	GIMAP7	461	131	1173	356	1245	246	1400	916	684	113	593	176	-10.4734	-1.76443	26.6605	2.42535e-07	3.9648e-06	3.74614e-39	4.0038e-63	1.30757e-106	1.03008e-13	1.201e-110	6.02555e-52	17.141	5.257	39.199	15.156	47.851	12.716	62.277	47.155	32.019	4.97	39.654	12.144	6	5-
2295	FOXF2	320	206	1417	173	872	137	889	213	617	104	370	61	-10.805	-2.23246	41.0724	1.46696e-10	4.44322e-09	3.69187e-05	1.18282e-181	2.88397e-91	3.82243e-83	9.80724e-99	6.65468e-54	6.023	4.206	23.783	3.729	17.103	3.583	20.323	5.609	14.72	2.305	12.589	2.134	6	5-
6332	SCN7A	2216	1693	6380	1197	2610	869	3065	670	2806	281	3560	531	-9.23414	-2.06612	34.892	3.48507e-09	8.18251e-08	2.78028e-10	0	1.81315e-110	4.26657632656508e-311	0	0	11.545	9.605	29.474	7.145	14.257	6.29	19.619	4.922	18.626	1.719	33.664	5.148	6	5-
3910	LAMA4	92	25	154	58	130	45	317	169	236	87	59	13	-11.6778	-1.48813	18.4256	1.76667e-05	0.000192436	4.70466e-09	2.02486e-06	5.85975e-06	5.82124e-08	7.38047e-20	1.42348e-07	14.043	3.97	21.337	10.107	19.879	9.549	55.562	34.075	42.928	15.517	19.496	3.853	6	5-
122953	JDP2	1544	1202	937	305	2983	470	894	379	1767	639	678	239	-9.51548	-1.43572	18.4035	1.7873e-05	0.000194481	1.80087e-06	3.01719e-45	#NUM!	9.40016e-37	6.81939e-144	8.79116e-48	15.953	13.505	8.603	3.61	32.241	6.748	11.3	5.505	23.216	7.76	12.696	4.593	6	5-
6711	SPTBN1	30989	12980	54450	23070	41405	12621	42118	10760	41817	6453	20196	3681	-6.29788	-1.84067	29.5211	5.53117e-08	1.01752e-06	0	0	0	0	0	0	185.961	84.799	289.827	158.616	260.413	105.225	310.304	91.005	319.613	45.466	219.916	47.296	6	5-
9844	ELMO1	1165	293	1606	379	1254	379	890	581	899	301	394	181	-9.88456	-1.48309	19.5197	9.9565e-06	0.000114828	1.12286e-110	2.01084e-120	4.39282e-63	3.36828e-09	3.54668e-81	5.02275e-18	14.246	3.907	17.423	5.312	16.087	6.442	13.371	10.029	14.028	4.326	8.759	4.126	6	5-
474344	GIMAP6	1513	405	3191	892	3346	630	3266	1413	2774	454	1425	425	-9.02112	-1.90857	31.8759	1.64345e-08	3.33966e-07	2.32322e-134	7.18419e-192	1.23413e-298	1.08523e-126	0	3.6039e-123	18.025	5.665	33.83	12.175	41.655	10.431	47.519	28.134	47.715	6.364	30.773	9.422	6	5-
220965	FAM13C	181	78	371	165	260	93	345	119	333	82	135	23	-11.2218	-1.60116	21.8864	2.89278e-06	3.76763e-05	5.42672e-09	8.44821e-10	1.26444e-10	2.47265e-21	3.45726e-41	1.14549e-19	6.524	3.047	11.973	6.812	9.753	4.646	15.114	6.013	15.25	3.477	8.812	1.54	6	5-
1264	CNN1	909	310	1825	559	1827	341	572	377	645	321	351	50	-9.91321	-1.63333	23.0742	1.55869e-06	2.14256e-05	6.83081e-60	4.56526e-96	2.16412e-164	4.97361e-06	6.35164e-32	1.20604e-55	24.697	9.115	44.374	17.393	51.536	12.877	18.746	14.262	22.144	10.291	17.199	2.523	6	5-
55901	THSD1	217	124	1258	161	788	82	1177	180	500	86	375	86	-10.3872	-2.37685	46.1682	1.08526e-11	4.06777e-10	1.28716e-05	1.25097e-156	3.14087e-106	4.09029e-157	7.58741e-80	2.17316e-42	3.999	2.088	20.834	3.884	20.416	2.505	28.141	6.978	16.72	2.068	11.304	2.08	6	5-
84969	TOX2	283	65	489	84	715	66	469	203	549	41	145	44	-10.8551	-2.40537	45.3229	1.67087e-11	5.99513e-10	2.05652e-30	3.24158e-50	4.84635e-102	4.96899e-19	7.29356e-124	4.42398e-13	5.325	1.444	8.185	1.812	14.109	1.727	11.038	6.059	18.315	0.909	4.987	1.55	6	5-
51554	CCRL1	125	76	361	71	252	15	191	35	197	92	270	42	-11.4571	-2.15079	36.4744	1.54684e-09	3.87447e-08	0.00520341	3.99078e-33	1.7835e-42	2.79054e-23	1.23975e-11	6.93248e-41	3.645	3.818	10.622	1.885	5.031	1.39	4.444	0.938	4.784	2.076	9.352	1.496	6	5-
4327	MMP19	10510	1476	1621	500	3546	509	1193	533	2462	708	1483	446	-8.78511	-1.9631	33.269	8.02504e-09	1.74555e-07	0	1.34353e-84	0	1.04848e-43	3.76221e-260	2.85153e-126	154.813	23.709	21.126	8.439	54.892	10.415	21.684	11.104	46.294	12.227	39.708	12.229	6	5-
2167	FABP4	572	92	2283	177	1792	65	1410	132	1270	688	711	80	-9.77647	-3.06627	71.0228	3.53115e-17	3.63328e-15	2.39719e-78	0	0	6.08102e-242	1.08671e-51	1.13402e-124	36.487	6.288	132.38	12.92	116.787	5.767	105.305	11.485	100.995	52.241	80.949	9.449	6	5-
10288	LILRB2	1302	126	954	237	1569	252	851	470	891	235	331	146	-10.0069	-1.94599	31.4592	2.03679e-08	4.05234e-07	2.10142e-230	1.98615e-67	9.57707e-161	1.54589e-17	1.08088e-102	1.88255e-16	17.828	1.882	11.562	3.719	22.575	6.226	14.378	9.105	15.58	3.774	8.242	3.723	6	5-
8516	ITGA8	1641	651	2159	802	1090	415	1352	329	1313	347	1197	183	-9.56295	-1.75849	27.161	1.872e-07	3.12596e-06	3.19547e-84	8.93829e-80	1.44094e-35	1.95023e-124	1.70335e-150	6.78839e-180	19.782	8.529	23.144	11.076	13.734	6.951	19.908	5.57	20.114	4.918	26.138	4.102	6	5-
2327	FMO2	3785	3043	8323	1222	7186	1148	3873	666	7456	841	6149	665	-8.21119	-2.42955	47.1926	6.43434e-12	2.47811e-10	2.976e-10	0	0	0	0	0	27.777	24.303	54.208	10.274	55.238	11.705	34.856	6.883	69.656	7.249	81.852	9.079	6	5-
10891	PPARGC1A	483	728	503	114	370	115	289	51	520	48	431	83	-10.6857	-1.90038	27.653	1.45146e-07	2.46904e-06	1.37554e-15	2.84944e-40	1.49545e-18	1.65564e-35	1.38705e-109	7.70027e-56	2.878	4.722	2.658	0.778	2.311	0.952	2.114	0.428	3.946	0.336	4.66	0.92	6	5-
2192	FBLN1	13262	2950	18433	3617	14129	4800	14998	6394	7499	5112	2480	392	-7.45947	-1.71025	25.5613	4.28545e-07	6.5947e-06	0	0	0	0	5.53235e-153	0	303.913	73.251	377.357	94.933	336.801	152.877	416.046	204.519	217.499	138.095	143.604	26.327	6	5-
3399	ID3	655	296	2718	489	2403	449	1571	436	903	776	543	144	-9.57003	-1.6357	23.5208	1.23571e-06	1.7338e-05	1.28419e-26	1.58895e-264	3.38443e-216	6.81138e-125	1.78075e-06	1.22659e-53	23.25	11.345	86.65	19.875	88.237	22.157	66.807	21.448	40.379	32.568	34.681	9.487	6	5-
1521	CTSW	106	31	336	129	1147	227	745	502	794	395	57	12	-10.5023	-1.47961	18.5218	1.67975e-05	0.000183731	1.12861e-09	1.60868e-12	3.52637e-98	1.15737e-06	4.62615e-39	1.39968e-07	3.623	1.145	10.309	5.049	40.582	10.787	30.542	23.798	34.208	15.959	3.507	0.761	6	5-
130271	PLEKHH2	1668	1315	8624	2248	3936	774	2685	840	3018	974	2750	933	-8.60882	-1.5486	21.5217	3.49856e-06	4.48046e-05	3.6999e-06	0	0	7.24363e-183	1.78404e-281	4.92229e-201	8.968	7.698	41.117	13.848	22.186	5.782	17.733	6.368	20.672	6.148	26.834	9.333	6	5-
10216	PRG4	885	654	2546	437	4939	483	2139	479	1958	238	1324	121	-9.21696	-2.48153	48.6795	3.01407e-12	1.24293e-10	6.32393e-06	6.23155e-258	0	6.89004e-213	0	6.55319e-253	7.756	6.257	19.694	4.389	46.181	5.879	46.975	9.904	36.785	2.442	34.255	1.973	6	5-
3730	KAL1	2224	2836	6973	660	2159	542	3880	802	5099	1875	6605	1150	-8.45239	-1.87317	28.5848	8.96816e-08	1.57921e-06	2.07093e-26	0	1.72788e-141	0	0	0	13.26	18.408	36.876	4.508	13.491	4.49	28.402	6.739	38.721	13.125	71.459	12.757	6	5-
22915	MMRN1	1900	688	5045	1187	993	564	3130	535	451	163	639	174	-9.26332	-1.67724	24.6828	6.75829e-07	9.9409e-06	8.4008e-114	0	3.82355e-08	0	3.00313e-37	1.99983e-61	14.561	5.737	34.317	10.422	7.97	6.005	29.408	5.773	4.399	1.467	8.882	2.481	6	5-
2281	FKBP1B	121	72	242	87	257	36	156	47	185	45	133	58	-11.6382	-1.62203	22.0254	2.6907e-06	3.52765e-05	0.00427537	2.13705e-10	1.43225e-29	8.61683e-12	1.95883e-23	2.16668e-07	6.878	4.486	12.323	5.677	16.028	2.85	10.917	4.013	13.591	3.037	13.921	6.217	6	5-
1850	DUSP8	543	394	658	232	1372	364	428	151	818	297	254	102	-10.2771	-1.32129	15.805	7.02177e-05	0.000663308	0.000167509	6.57226e-28	6.77333e-84	7.12764e-25	7.71197e-67	5.92907e-15	4.637	3.66	4.989	2.27	12.265	4.319	4.478	1.815	8.888	2.98	3.933	1.62	6	5-
53905	DUOX1	4336	3106	12976	1604	8960	1550	4824	1386	6713	563	1808	484	-8.12452	-2.16857	38.3323	5.96665e-10	1.61392e-08	9.24048e-31	0	0	0	0	3.74228e-175	30.599	23.894	80.964	12.969	66.464	15.193	42.012	13.823	60.427	4.655	23.173	6.353	6	5-
51365	PLA1A	346	63	360	142	1106	126	117	60	229	108	107	29	-10.975	-1.77004	25.8719	3.64833e-07	5.73621e-06	7.13566e-44	1.6288e-12	8.00966e-142	0.00101329	3.93409e-13	4.87765e-11	10.598	2.782	9.852	5.165	35.095	5.366	6.207	2.529	10.324	4.838	5.855	1.638	6	5-
56967	C14orf132	1325	695	4338	733	2580	643	2181	445	2920	495	1240	269	-9.11937	-2.05495	36.5003	1.5264e-09	3.83244e-08	1.50518e-36	0	3.87003e-170	1.16069e-235	0	6.24446e-146	6.6	3.77	19.158	4.183	13.475	4.45	13.349	3.126	18.532	2.894	11.211	2.493	6	5-
4851	NOTCH1	3379	1351	7227	1577	4330	1203	4881	2697	4173	1953	1070	373	-8.46952	-1.43332	18.7789	1.46786e-05	0.00016216	3.91067e-170	0	3.12641e-246	6.08779e-96	1.90284e-226	8.75189e-76	13.468	5.866	25.53	7.202	18.105	6.662	23.926	15.169	21.201	9.135	7.744	2.767	6	5-
338442	HCAR2	1320	957	1368	190	1085	207	484	105	692	72	303	80	-10.076	-2.13804	37.2777	1.02448e-09	2.66467e-08	1.89221e-09	3.11447e-162	3.13753e-96	2.5398e-50	3.6803e-140	1.05895e-30	28.369	22.274	26.137	4.673	24.329	6.174	12.542	3.118	18.718	1.818	11.704	3.185	6	5-
5734	PTGER4	2685	344	2066	526	1337	510	1537	929	1297	412	783	223	-10.01	-1.70591	24.9972	5.74134e-07	8.60177e-06	0	4.17974e-141	3.33464e-43	7.78685e-22	9.20389e-124	1.50083e-71	30.615	4.264	20.943	6.871	15.939	8.08	21.419	14.883	18.798	5.523	16.175	4.729	6	4-
3575	IL7R	3260	780	1229	681	2078	668	1500	1022	1869	291	669	309	-9.88344	-1.42719	17.4793	2.90448e-05	0.000299792	0	3.31873e-13	4.61056e-94	1.01767e-11	1.07792467227992e-312	1.40236e-29	76.458	19.819	25.756	18.293	50.684	21.775	42.567	33.446	55.468	8.046	28.329	13.464	6	4-
4038	LRP4	825	1103	2196	652	1121	209	890	110	1196	269	444	221	-10.3245	-1.63516	21.8884	2.88982e-06	3.76753e-05	5.46454e-14	3.25844e-121	1.17208e-101	1.64743e-134	2.28169e-157	4.34043e-17	3.728	5.428	8.796	3.375	5.312	1.312	4.943	0.701	6.887	1.427	3.642	1.858	6	4-
10516	FBLN5	4023	2108	7924	1980	6092	2351	4572	1615	4481	1276	2742	648	-8.86344	-1.57574	22.4293	2.18022e-06	2.91297e-05	5.65419e-109	0	1.33452e-187	3.50819e-259	0	3.85322e-299	61.3	34.879	107.514	34.56	96.889	49.78	84.871	34.499	86.665	22.878	75.613	18.356	6	4-
64116	SLC39A8	1421	670	4676	647	3180	1365	2890	617	3371	351	3796	982	-9.37097	-2.04958	35.0502	3.21322e-09	7.59777e-08	2.03037e-51	0	3.16011e-74	1.32704e-299	0	0	65.815	33.407	195.402	34.304	165.801	87.908	181.357	39.361	300.235	19.271	315.363	84.336	6	4-
1117	CHI3L2	327	110	520	103	220	43	852	1150	475	41	394	43	-11.0941	-2.08377	31.9529	1.57953e-08	3.23457e-07	1.0962e-22	3.17865e-47	1.24499e-19	4.3028e-18	4.97513e-102	7.12241e-71	29.093	12.789	21.341	14.285	18.95	6.853	81.209	93.324	42.479	2.316	56.174	6.487	6	4-
6092	ROBO2	962	776	1378	594	817	230	677	168	1255	294	733	285	-10.4473	-1.42731	18.0443	2.1582e-05	0.000230773	0.00253585	4.28383e-36	2.51769e-46	3.29783e-61	5.1406e-160	1.31504e-44	4.492	3.946	5.704	3.178	4	1.492	3.983	1.106	7.467	1.611	6.213	2.476	6	4-
79168	LILRA6	456	60	367	130	459	142	282	181	373	155	299	226	-11.5025	-1.33779	15.253	9.40249e-05	0.000858079	1.35001e-70	8.00893e-16	3.76654e-23	0.000762143	1.19875e-25	0.00529123	4.645	0.666	3.314	1.517	4.905	2.007	3.544	2.609	4.851	1.852	5.536	4.283	6	4-
221	ALDH3B1	2621	1319	4127	2103	3806	1661	2169	582	3497	838	1064	488	-9.45413	-1.32712	15.9215	6.60259e-05	0.00062653	1.22738e-79	1.27139e-60	2.00495e-84	3.07939e-179	0	1.79472e-47	47.34	22.104	56.275	37.039	61.358	39.265	40.939	12.624	68.58	15.139	29.731	13.982	6	4-
138311	FAM69B	230	315	897	196	774	135	503	194	472	264	120	28	-11.2258	-1.39763	16.3852	5.16871e-05	0.000505316	2.54301e-05	1.83286e-73	2.43144e-74	2.07996e-25	2.34067e-18	4.86591e-14	4.022	5.977	13.975	3.926	14.117	3.28	10.699	4.748	10.463	5.433	3.794	0.91	6	4-
5549	PRELP	4942	3368	14358	2350	10638	3768	6270	1851	6729	2257	2905	536	-8.5497	-1.70052	25.4318	4.58304e-07	6.99754e-06	3.80606e-47	0	0	0	0	0	73.565	62.129	172.151	73.168	244.029	141.77	196.233	62.505	282.933	104.637	34.051	8.2	6	4-
22998	LIMCH1	7540	7820	17436	6784	9706	2109	8894	2795	11392	2775	9191	2124	-8.15983	-1.52789	20.3887	6.32032e-06	7.5851e-05	3.94439e-09	0	0	0	0	0	53.642	61.022	109.601	55.357	72.915	20.857	78.946	28.481	104.491	23.175	119.916	28.296	6	4-
441478	NRARP	292	102	383	158	226	75	762	173	197	148	296	43	-11.5945	-1.56733	21.04	4.49797e-06	5.57993e-05	1.14429e-19	4.65345e-12	2.21945e-10	3.84604e-75	0.00114056	1.6085e-46	4.446	1.686	5.192	2.755	3.591	1.587	14.133	3.692	3.807	2.651	8.156	1.217	6	4-
83716	CRISPLD2	12583	2581	3119	1178	5097	2040	4499	1594	2347	1984	2650	318	-8.99827	-1.57832	21.41	3.70825e-06	4.70878e-05	0	1.24253e-110	1.20878e-143	6.43395e-254	5.79014e-17	0	104.573	23.337	23.014	11.216	44.35	23.556	45.816	18.646	24.822	19.37	39.936	4.916	6	4-
29950	SERTAD1	2814	714	823	498	1591	268	543	325	1223	336	370	152	-10.4192	-1.49145	19.2907	1.1225e-05	0.000127703	1.68652e-263	7.78796e-06	1.61441e-156	1.21078e-08	1.47063e-135	8.74251e-21	107.861	29.528	28.366	21.855	63.005	14.282	24.877	17.236	58.992	15.238	25.497	10.811	6	4-
2878	GPX3	19463	4667	36093	3577	50129	4541	17948	3076	16212	9844	6244	4338	-7.51567	-2.08287	35.3212	2.79576e-09	6.66139e-08	0	0	0	0	0	1.05787e-72	465.571	120.932	771.612	97.997	1246.79	150.972	519.276	102.643	490.637	277.649	269.634	192.774	6	4-
388	RHOB	8779	7875	14097	6624	21552	3010	6521	2139	16319	3772	5099	2089	-7.96394	-1.47441	18.9521	1.34043e-05	0.000149182	0.00381064	5.97991e-275	0	0	0	9.46627e-278	149.804	145.843	214.363	129.473	383.546	71.376	135.355	51.117	353.21	75.77	157.382	66.26	6	4-
83648	FAM167A	453	318	1645	656	1612	394	927	117	1701	371	769	372	-10.3139	-1.6335	22.9025	1.70431e-06	2.329e-05	0.000140214	3.4974e-52	3.1765e-109	3.23415e-138	5.08837e-229	8.56504e-31	4.271	3.261	13.778	7.086	15.906	5.162	10.7	1.552	20.402	4.111	13.144	6.524	6	4-
55450	CAMK2N1	702	326	1864	814	1277	231	1109	372	1018	229	967	349	-10.3222	-1.61631	23.2426	1.42798e-06	1.97844e-05	7.3606e-27	1.43468e-46	2.14046e-118	9.99821e-69	5.29866e-134	3.68032e-65	12.053	6.075	28.521	16.009	22.866	5.512	23.16	8.944	22.169	4.629	30.031	11.138	6	4-
7071	KLF10	5456	3206	3439	1834	4130	989	3267	1197	5258	2428	3521	1065	-8.96997	-1.29714	15.4907	8.29104e-05	0.000768679	2.14728e-101	6.33227e-42	5.07333e-286	1.22811e-174	4.40721e-292	1.29863e-297	78.392	50.032	43.983	30.186	61.961	19.746	57.227	24.123	95.921	41.041	91.579	28.45	6	4-
26051	PPP1R16B	4119	448	2071	780	1301	578	1709	1380	1013	209	792	298	-9.85993	-1.56771	20.3356	6.49816e-06	7.77187e-05	0	3.04656e-74	4.64051e-28	0.00433756	3.20785e-142	2.84219e-50	25.966	3.079	11.58	5.635	8.603	5.064	13.242	12.283	8.148	1.548	9.076	3.501	6	4-
57224	NHSL1	1444	638	2442	2604	1395	336	1708	716	1939	571	1154	291	-9.82385	-1.33543	15.505	8.22852e-05	0.00076322	2.04155e-60	3.22605e-26	1.23828e-96	2.94524e-71	2.81487e-200	7.62914e-119	8.316	4.255	12.472	21.66	8.426	2.689	12.088	5.82	14.242	3.863	12.076	3.122	6	4-
23371	TENC1	5171	2960	12919	2239	11066	2594	7353	2590	7351	2061	1975	1159	-8.46271	-1.54892	21.4146	3.69945e-06	4.70045e-05	1.05042e-105	0	0	0	0	3.24192e-46	42.533	26.487	94.324	21.098	95.309	29.643	74.121	29.981	76.932	19.91	29.453	17.729	6	4-
8809	IL18R1	742	313	466	187	980	247	394	271	1190	128	509	164	-10.8265	-1.58669	21.2518	4.02726e-06	5.05878e-05	1.63057e-34	2.16974e-15	1.6686e-64	0.00143944	9.99584e-237	1.79775e-40	8.226	3.772	4.592	2.375	11.361	3.805	5.34	4.222	16.771	1.668	10.225	3.381	6	4-
1410	CRYAB	393	194	1077	154	1326	111	405	108	554	336	680	74	-10.859	-2.15988	37.8115	7.79217e-10	2.0756e-08	1.2704e-13	2.20065e-125	1.09931e-196	3.87483e-34	1.16236e-17	6.19844e-121	33.894	17.816	85.256	15.191	115.704	13.322	40.171	12.547	59.078	34.68	104.01	11.795	6	4-
284454	LOC284454	3304	1479	1335	728	3384	480	512	265	986	417	1005	306	-9.89433	-1.41605	17.869	2.3665e-05	0.000250494	8.3354e-133	2.35706e-15	0	2.66094e-13	1.6681e-64	1.25292e-84	79.298	38.451	28.636	20.011	84.443	16.011	14.862	8.872	29.939	11.801	43.542	13.643	6	4-
7078	TIMP3	40293	11930	79818	14096	81453	13035	42796	8299	57589	64855	26024	16576	-6.42348	-1.60223	21.8606	2.93192e-06	3.80609e-05	0	0	0	0	6.50824e-06	0	277.86	89.542	488.413	111.37	588.472	124.889	362.058	80.618	505.648	525.22	325.563	212.656	6	4-
5730	PTGDS	8211	1589	4780	2041	6612	1638	4664	3464	4331	480	654	188	-8.84935	-1.78591	26.3767	2.80914e-07	4.5322e-06	0	2.5822e-125	0	7.62295e-18	0	2.41339e-59	524.702	108.785	277.675	149.248	431.654	145.597	348.915	301.899	345.015	36.513	74.589	22.244	6	4-
79567	FAM65A	3909	1075	5691	1483	6664	2300	4274	1968	4674	2065	1429	854	-8.90976	-1.35545	16.7966	4.16088e-05	0.000417082	0	0	2.06595e-261	2.77121e-143	8.4654e-281	1.22305e-31	37.814	11.304	48.84	16.434	67.487	30.91	50.609	26.737	57.424	23.441	25.019	15.342	6	4-
7472	WNT2	347	169	873	160	674	170	510	599	530	236	262	48	-10.9827	-1.44984	17.5741	2.76323e-05	0.0002877	1.17598e-12	3.98946e-84	9.619e-45	4.33744e-05	2.43516e-32	7.69216e-36	5.298	4.84	17.909	3.632	14.83	4.214	11.161	15.489	12.869	5.457	6.929	1.923	6	4-
10871	CD300C	497	40	366	48	432	127	78	40	232	90	91	55	-11.7639	-1.83674	26.4886	2.65095e-07	4.3101e-06	2.76681e-94	1.06513e-45	1.60682e-23	0.0055814	2.76538e-18	0.00840245	14.043	1.223	9.26	1.553	12.667	4.988	2.656	1.573	8.28	3.002	4.636	2.886	6	4-
26577	PCOLCE2	213	51	1258	49	722	305	315	43	444	388	204	80	-11.0998	-1.95517	29.355	6.02607e-08	1.09608e-06	6.31082e-22	1.26825e-243	2.14066e-18	2.65564e-45	0.00245083	6.0058e-13	4.325	1.123	22.795	1.14	15.268	8.607	7.76	1.221	11.422	9.282	7.486	3.019	6	4-
7466	WFS1	1299	1087	4392	717	3762	1271	2648	1164	3190	974	1130	392	-9.41172	-1.43657	18.3022	1.88488e-05	0.000203621	0.00807721	0	3.24161e-154	2.22214e-99	1.57895761918604e-316	1.36266e-80	13.897	12.634	41.653	8.787	42.136	18.89	34.703	17.486	43.291	12.215	21.85	7.778	6	4-
1305	COL13A1	183	69	387	61	302	97	225	113	263	89	123	76	-11.8168	-1.45027	18.0517	2.14987e-05	0.000229999	2.93364e-11	8.64426e-43	1.61845e-14	6.95563e-07	2.75086e-24	0.00262808	3.13	1.292	5.839	1.197	5.451	2.308	4.81	2.767	5.778	1.782	3.842	2.423	6	4-
4783	NFIL3	4454	690	1618	850	2803	738	1571	539	1197	796	2700	735	-9.5759	-1.54385	20.9773	4.64756e-06	5.7587e-05	0	1.31421e-21	5.41774e-172	6.0741e-94	1.151e-27	4.87411e-257	87.628	14.723	28.398	19.154	57.446	20.178	37.515	14.829	29.842	18.447	96.011	26.873	6	4-
760	CA2	660	941	1988	193	1185	1029	1701	386	1652	640	1138	215	-9.80875	-1.47645	17.0175	3.7037e-05	0.000374653	5.52641e-16	2.73341e-286	0.00605717	3.19789e-167	1.51717e-122	1.0281e-148	17.069	26.348	45.987	5.716	31.837	36.988	53.122	13.91	54.014	19.525	53.1	10.328	6	4-
2355	FOSL2	12396	2023	4212	2118	7278	2439	7367	2763	5814	4304	3451	1161	-8.25749	-1.38059	17.0381	3.66374e-05	0.00037079	0	4.15275e-65	1.77033e-302	0	6.20057e-85	4.36011e-255	119.318	21.178	36.016	23.356	73.304	32.62	86.796	37.406	71.182	48.683	60.214	20.786	6	4-
3678	ITGA5	7511	1383	6984	1852	8358	2532	5433	3189	6239	3986	2193	974	-8.34611	-1.39643	17.4803	2.90298e-05	0.000299792	0	0	0	6.05723e-85	2.85309e-159	3.68022e-103	67.736	13.567	55.937	19.134	78.892	31.726	60.002	40.463	71.581	42.235	35.856	16.338	6	4-
23037	PDZD2	1796	1492	6052	864	2913	1167	3057	590	4867	922	2766	474	-8.97638	-1.93082	31.0043	2.57464e-08	5.04591e-07	0.000743892	0	3.69584e-82	0	0	0	5.681	5.142	16.96	3.131	9.67	5.128	11.901	2.635	19.629	3.422	15.89	2.79	6	4-
64174	DPEP2	729	82	771	204	1034	281	602	389	580	157	196	139	-10.629	-1.60512	21.4216	3.68595e-06	4.68898e-05	2.61296e-121	8.06892e-51	2.79941e-61	7.50223e-07	1.42815e-65	0.00728373	18.099	2.205	17.114	5.801	26.682	9.697	18.064	13.466	18.212	4.597	8.782	6.411	6	4-
51090	PLLP	544	360	2493	806	3016	316	1428	234	2097	243	619	356	-9.74404	-1.955	30.9858	2.59921e-08	5.08169e-07	3.66793e-07	1.10641e-119	0	5.58155e-182	0	5.44071e-16	15.793	11.305	64.821	26.795	90.83	12.751	49.929	9.449	76.873	8.328	32.392	19.191	6	4-
8793	TNFRSF10D	2313	525	653	345	879	281	794	153	665	354	951	514	-10.1393	-1.43466	18.2481	1.93918e-05	0.000209057	2.52203e-241	3.52849e-09	6.29636e-41	1.73813e-90	7.99423e-29	4.9772e-29	25.338	6.253	6.358	4.33	10.07	4.277	10.635	2.356	9.261	4.559	18.877	10.472	6	4-
79625	C4orf31	2023	1573	5437	1695	2118	337	3053	1165	2552	1498	4372	1861	-8.94988	-1.30282	15.3974	8.71092e-05	0.000801588	2.96098e-08	2.11383e-276	5.05548e-218	9.71655e-152	4.90532e-84	1.33356e-222	27.623	23.333	66.063	26.513	30.207	6.394	50.853	22.322	44.256	24.059	108.087	47.247	6	4-
4542	MYO1F	4904	645	3439	1011	4649	1487	3607	2810	3252	1120	963	822	-8.91352	-1.35849	15.6788	7.50599e-05	0.000702724	0	5.60403e-192	8.95733e-211	1.05388e-08	7.99794e-281	0.00366959	45.291	6.479	28.211	10.697	44.936	19.082	40.788	36.509	38.207	12.154	16.124	14.121	6	4-
284	ANGPT1	939	580	2078	709	1259	274	1278	436	1569	248	1179	166	-9.89909	-1.86554	29.6005	5.30909e-08	9.85304e-07	2.13001e-15	8.00016e-91	4.36753e-98	3.45452e-77	6.10134e-260	1.54165e-185	9.172	7.411	16.439	8.351	13.193	3.4	18.922	9.187	19.208	2.6	31.154	2.763	6	4-
408	ARRB1	4079	1795	11366	2828	9799	1987	8381	1559	7323	1702	3291	1587	-8.25081	-1.80694	29.0079	7.20831e-08	1.29098e-06	9.33442e-170	0	0	0	0	9.89253e-130	35.939	32.579	96.161	37.599	106.918	33.701	102.271	31.705	103.306	33.577	56.542	29.637	6	4-
3977	LIFR	4204	2596	9566	1468	4870	1660	5034	1060	7457	2541	3944	2053	-8.43229	-1.57329	21.9667	2.77423e-06	3.62584e-05	1.51902e-64	0	3.08412e-196	0	0	3.52734e-129	15.653	10.53	31.563	6.263	19.024	8.587	23.056	5.57	35.394	11.102	26.665	14.225	6	4-
9254	CACNA2D2	3632	3854	13611	860	6991	1964	6855	1926	9074	1319	3600	2002	-8.38338	-1.80462	25.7528	3.88069e-07	6.0472e-06	4.24403e-07	0	0	0	0	1.87458e-98	26.262	30.482	87.027	7.13	53.253	19.737	61.508	19.826	84.187	11.19	47.535	27.031	6	4-
152007	GLIPR2	3125	695	3732	912	2764	544	1865	948	2799	916	1015	546	-9.41439	-1.6345	23.6857	1.13423e-06	1.59889e-05	0	1.06317e-266	2.40713e-236	1.69635e-48	4.81284e-257	4.35797e-31	69.192	16.678	73.794	23.128	63.681	16.74	50.018	29.31	78.459	23.904	40.591	22.462	6	4-
2202	EFEMP1	6256	4796	14455	2983	7956	2307	9236	2677	6895	3504	7229	3959	-8.12297	-1.306	15.5413	8.07218e-05	0.000750709	4.0375e-26	0	0	0	1.63348132047727e-317	8.03568e-206	82.862	69.352	169.87	45.294	110.639	42.474	150.872	50.284	116.904	54.567	174.55	97.894	6	4-
22898	DENND3	3172	1283	4292	2703	6021	1061	3070	1473	5347	1510	2037	885	-8.91107	-1.38648	17.2032	3.35874e-05	0.000341901	2.134e-156	2.06036e-19	0	5.1698e-93	0	2.99553e-100	22.034	9.7	26.456	21.512	43.818	10.24	26.162	14.414	47.291	12.318	25.669	11.437	6	4-
976	CD97	12153	2666	7889	1889	10658	3424	5444	2585	8839	1750	1624	1351	-8.30428	-1.55789	20.9487	4.71736e-06	5.82798e-05	0	0	0	7.56437e-169	0	5.09934e-06	171.688	55.577	98.252	42.178	156.711	94.291	170.674	81.603	234.712	44.513	85.615	55.879	6	4-
90102	PHLDB2	1762	575	2628	800	1616	886	1623	624	1452	692	2035	549	-9.67909	-1.38466	17.4326	2.97679e-05	0.000306589	1.06726e-122	1.8645e-139	4.5141e-15	7.04215e-80	6.74644e-77	9.12534e-196	12.179	4.332	16.116	8.098	11.714	8.511	13.782	6.088	14.023	5.621	25.568	7.071	6	4-
116535	MRGPRF	276	165	985	206	659	224	627	259	491	271	173	28	-10.8288	-1.48898	19.3851	1.06838e-05	0.000122209	7.36324e-06	3.29047e-84	1.28086e-27	1.50779e-27	6.60425e-20	8.18455e-26	4.948	3.232	15.659	4.234	12.412	5.584	13.871	6.589	11.274	5.713	5.657	0.938	6	4-
255189	PLA2G4F	752	846	3123	199	1476	597	1697	227	2772	235	361	108	-9.78506	-2.19607	35.3987	2.68668e-09	6.44496e-08	0.000656081	0	3.59881e-41	7.85264e-245	0	1.98261e-31	10.248	10.695	31.977	2.637	17.952	9.736	30.085	4.319	68.573	3.191	7.63	2.333	6	4-
130497	OSR1	265	157	1003	185	628	142	677	228	389	86	109	53	-10.9356	-1.65102	23.4724	1.26717e-06	1.76966e-05	9.00613e-06	2.94786e-96	3.09819e-47	3.18327e-42	1.1178e-52	3.94097e-05	5.828	3.742	19.698	4.66	14.373	4.34	18.037	7.003	10.831	2.229	4.33	2.166	6	4-
2534	FYN	3180	690	1987	895	3289	1215	2868	1688	2265	924	1136	335	-9.28314	-1.39155	17.3969	3.03327e-05	0.000311641	0	2.37792e-45	1.68343e-112	7.10024e-45	3.44845e-155	2.3781e-99	76.514	18.004	42.786	24.674	82.264	40.659	83.46	56.772	69.094	26.265	49.452	15.007	6	4-
847	CAT	4249	2569	12662	2788	6258	2623	5489	1876	7268	3049	5091	1741	-8.28288	-1.37827	17.4355	2.97217e-05	0.000306263	5.41785e-71	0	1.69304e-155	0	0	0	75.51	49.54	200.582	56.752	115.949	64.778	118.586	46.671	163.786	63.796	163.615	57.507	6	4-
7128	TNFAIP3	20711	2130	2820	2010	12133	2234	4855	3038	4649	1699	5415	1182	-8.16103	-1.71292	24.1676	8.83077e-07	1.27044e-05	0	0.00127042	0	3.3502e-57	0	0	178.763	20	21.614	19.876	109.63	26.791	51.335	36.901	51.058	17.229	84.747	18.977	6	4-
26468	LHX6	242	50	381	140	280	110	217	131	142	53	76	19	-11.6919	-1.47547	18.3685	1.82046e-05	0.000197577	4.22997e-28	2.02265e-15	3.10144e-09	0.000846328	6.17073e-12	1.20803e-08	3.599	0.812	5.038	2.387	4.367	2.274	3.967	2.76	2.705	0.929	2.063	0.528	6	4-
55118	CRTAC1	854	290	2826	255	1340	249	2413	1195	2615	1094	967	528	-9.61939	-1.70892	25.0634	5.54766e-07	8.35333e-06	8.25625e-57	0	9.76741e-122	2.62419e-67	2.88681e-172	1.04124e-28	22.157	8.594	57.956	7.735	31.277	7.222	61.067	34.853	69.129	26.903	48.842	32.339	6	4-
8322	FZD4	1632	849	5610	2407	7469	1033	4241	1464	4412	1259	2141	618	-8.8016	-1.64963	24.2384	8.51197e-07	1.22542e-05	1.1288e-45	5.08784e-145	0	1.18958e-249	0	6.67905e-191	8.254	4.676	25.159	13.949	39.61	7.259	26.356	10.442	28.432	7.475	19.655	5.816	6	4-
23090	ZNF423	542	121	1014	233	800	835	612	222	548	379	156	39	-10.5973	-1.33805	15.0223	0.000106249	0.000959215	1.46411e-58	7.83902e-79	1.20602e-09	3.3518e-34	1.53269e-11	5.3776e-17	4.269	1.037	7.09	2.103	6.598	9.138	5.909	2.462	5.494	3.506	2.228	0.571	6	4-
947	CD34	2430	976	8069	1271	2227	903	5912	1373	1851	1076	2379	402	-8.91547	-1.74798	26.7828	2.27653e-07	3.74485e-06	1.4984e-121	0	2.26349e-61	0	6.97094e-63	0	39.767	17.345	117.773	23.828	38.004	20.54	117.71	31.51	38.473	20.748	70.508	12.242	6	4-
51285	RASL12	461	351	2558	375	1056	451	1017	386	837	217	573	99	-10.1523	-1.67017	23.6964	1.12791e-06	1.59319e-05	0.00554364	1.10581e-291	1.00354e-25	9.08289e-52	4.15258e-98	5.69299e-80	7.127	5.892	35.217	6.641	17.038	9.689	19.151	8.365	16.423	3.948	16.031	2.845	6	4-
51393	TRPV2	3031	507	3438	665	2952	844	2225	1339	2006	622	724	419	-9.34587	-1.62171	22.764	1.83169e-06	2.48207e-05	0	8.37784886428808e-314	6.23908e-161	8.94586e-32	9.39068e-196	2.77635e-18	42.715	7.761	43.122	10.735	43.444	16.528	38.237	26.472	35.897	10.311	18.471	10.979	6	4-
222223	KIAA1324L	881	1061	2156	450	1227	587	2284	723	2175	483	1541	206	-9.65546	-1.60504	21.2257	4.08256e-06	5.116e-05	1.52099e-07	1.1547e-183	1.03774e-20	2.64124e-153	3.12289e-288	1.24438e-248	5.343	7.005	11.595	3.127	7.8	4.946	17.006	6.178	16.795	3.438	16.953	2.324	6	4-
4502	MT2A	5628	746	1276	555	5960	724	1833	583	4624	1097	760	462	-9.08991	-1.89642	30.1254	4.05002e-08	7.6379e-07	0	1.2289e-32	0	3.09009e-122	0	2.16164e-16	1051.63	144.506	228.825	118.392	1080.03	188.687	365.081	139.083	1030.92	251.405	244.995	158.281	6	4-
220213	OTUD1	971	392	1470	699	1688	360	963	433	1360	414	1144	388	-9.94785	-1.46585	19.4395	1.03838e-05	0.000119037	6.73353e-49	1.54174e-28	1.93262e-133	8.85075e-35	1.24598e-135	3.8033e-84	12.264	5.38	16.514	10.113	22.278	6.318	14.849	7.678	21.823	6.149	26.168	9.112	6	4-
84879	MFSD2A	1526	2508	4091	864	2345	1186	1563	641	3486	351	1142	352	-9.27976	-1.41329	16.005	6.31756e-05	0.000602479	1.74303e-67	0	3.00887e-31	4.34751e-68	0	7.60718e-95	29.423	52.82	70.065	20.42	47.454	31.795	38.344	17.547	93.794	7.966	40.188	12.685	6	4-
3037	HAS2	4754	684	451	275	452	221	660	146	521	245	1268	75	-10.2101	-1.90498	28.4952	9.39323e-08	1.65267e-06	0	0.00162033	9.96303e-08	1.14436e-66	6.45994e-29	7.31386e-277	57.169	8.933	4.814	3.788	5.685	3.691	9.698	2.462	7.947	3.458	27.568	1.674	6	4-
366	AQP9	2163	191	1453	339	1408	420	855	469	1222	395	591	356	-10.1988	-1.69091	24.0114	9.57666e-07	1.37117e-05	0	3.72939e-110	1.16005e-72	4.93649e-18	4.08557e-114	3.02326e-13	28.229	2.708	16.87	5.068	19.199	7.617	13.619	8.592	20.259	6.063	13.967	8.639	6	4-
387758	FIBIN	650	324	1985	274	2428	224	1456	203	1775	1118	671	80	-10.0727	-2.28164	42.2082	8.20544e-11	2.63755e-09	3.36276e-21	2.18801e-235	0	7.95149e-206	2.70684e-48	1.38521e-114	8.511	4.609	23.123	4.11	33.214	4.075	23.267	3.731	29.523	17.216	15.91	1.948	6	4-
6376	CX3CL1	2917	1304	3723	2523	20072	802	4143	1314	5615	1568	1873	2094	-8.61742	-1.50497	17.9185	2.30565e-05	0.000244879	7.14029e-118	1.36162e-08	0	2.65153e-276	0	0.000515964	34.665	16.843	39.341	34.348	249.345	13.243	60.149	21.934	84.802	21.909	40.321	46.276	6	4-
3131	HLF	1015	1084	2889	404	1303	679	1598	466	1542	638	1048	396	-9.91783	-1.31558	15.041	0.000105202	0.000950989	0.00603918	0	1.22697e-15	2.36192e-119	5.5275e-104	6.02067e-66	6.854	7.967	17.309	3.126	9.218	6.37	13.239	4.433	13.258	5.059	12.838	4.975	6	4-
115572	FAM46B	480	268	978	99	1077	168	507	96	986	346	333	206	-10.7748	-1.8623	29.0122	7.19236e-08	1.28922e-06	1.20038e-11	5.94265e-139	8.54336e-113	9.01689e-59	9.82296e-84	2.97478e-07	8.164	4.947	14.822	1.929	19.104	3.971	10.489	2.287	21.271	6.927	10.244	6.512	6	4-
387509	GPR153	958	296	1547	249	708	418	803	362	665	206	194	38	-10.6244	-1.67195	23.8531	1.03974e-06	1.47373e-05	1.48078e-72	4.82525e-165	6.01507e-05	4.6365e-29	1.32619e-65	1.67425e-25	9.019	3.031	12.937	2.686	6.975	5.468	9.255	4.794	7.964	2.279	3.311	0.665	6	4-
1396	CRIP1	4504	1315	3634	2645	3350	1109	1692	575	2094	279	1169	766	-9.34632	-1.42139	17.2584	3.2626e-05	0.000333245	0	0.00371416	4.85245e-143	1.63343e-102	0	1.04924e-18	784.762	238.295	604.185	526.203	569.004	269.419	317.128	128.744	437.215	59.434	352.57	244.933	6	4-
1028	CDKN1C	182	274	528	66	436	120	249	83	480	149	100	51	-11.4876	-1.39556	15.8801	6.74828e-05	0.000639199	1.83858e-06	5.66664e-67	3.46865e-26	3.34285e-16	1.89079e-47	0.000232047	4.722	7.762	12.15	1.963	11.878	4.329	7.965	3.053	15.935	4.543	4.728	2.469	6	4-
50486	G0S2	1720	154	653	217	547	121	459	309	739	541	382	99	-10.7057	-1.6304	21.9998	2.7268e-06	3.57053e-05	1.92476666185380e-313	6.36776e-31	1.819e-42	0.000151896	2.56157e-12	1.21734e-38	87.917	8.463	30.177	12.696	28.724	8.601	27.751	21.696	47.311	32.817	34.976	9.379	6	4-
91461	PKDCC	356	143	1813	807	1088	170	554	357	1107	184	213	60	-10.563	-1.65611	23.1865	1.47025e-06	2.02763e-05	1.03295e-18	5.82618e-43	2.88348e-114	1.56342e-06	9.73165e-179	1.95176e-20	5.715	2.492	25.924	14.839	18.223	3.792	10.827	8.03	22.548	3.476	6.186	1.79	6	4-
91851	CHRDL1	2693	1493	3500	1033	3071	1059	2204	850	2293	569	2326	281	-9.42545	-1.70913	25.4301	4.5871e-07	6.99754e-06	7.41003e-62	3.99496e-194	2.71479e-121	9.29348e-108	4.77625e-278	0	59.895	30.405	62.114	25.997	38.667	31.396	58.997	21.583	53.656	11.86	64.044	6.452	6	4-
10908	PNPLA6	3547	1026	7582	1156	6035	1568	3898	2067	4772	1161	843	565	-8.95473	-1.62764	23.0182	1.60477e-06	2.1987e-05	1.52515e-287	0	0	4.08271e-88	0	1.46054e-12	34.369	10.888	64.998	12.845	61.635	21.119	46.948	28.595	59.477	13.212	14.951	10.241	6	4-
80325	ABTB1	1478	416	2196	423	1989	502	1125	558	1248	525	391	201	-10.0849	-1.53007	20.9641	4.67962e-06	5.78476e-05	3.28255e-124	9.8669e-202	1.62671e-129	1.38778e-31	3.8478e-82	4.87618e-14	32.069	10.253	42.179	12.744	45.489	15.128	30.544	21.733	34.94	13.363	15.556	8.155	6	4-
2012	EMP1	38232	5263	9782	5165	9240	2997	8724	2516	10818	6234	11127	2847	-7.76064	-1.60855	22.7002	1.89346e-06	2.56081e-05	0	3.28307e-122	0	0	0	0	544.112	81.357	123.913	84.205	137.319	59.269	151.385	50.228	195.491	104.371	286.671	75.333	6	4-
3953	LEPR	1087	356	2586	388	754	390	1525	212	983	256	925	732	-10.1657	-1.70778	24.3282	8.12399e-07	1.17521e-05	9.14555e-76	3.67274e-290	8.26704e-10	4.44059e-216	8.39602e-115	1.53031e-05	16.166	5.75	34.241	6.61	11.706	8.06	27.639	4.421	18.559	4.48	24.899	20.24	6	4-
7004	TEAD4	395	93	298	173	503	113	255	144	287	97	159	49	-11.0611	-1.4782	18.7931	1.45692e-05	0.000161121	1.03378e-40	0.0024476	2.29238e-38	1.93045e-05	4.3056e-26	5.00735e-14	17.573	4.486	11.886	8.82	23.228	6.999	13.599	8.894	18.757	5.113	12.777	4.063	6	4-
2014	EMP3	2660	525	2420	616	2466	620	1478	985	1746	857	672	479	-9.26108	-1.36073	16.3055	5.3908e-05	0.000525803	8.90166014601836e-313	6.3932e-165	3.86705e-161	3.8395e-13	3.6889e-87	1.05779e-07	166.148	35.146	137.326	44.031	157.458	53.866	108.202	83.978	136.025	63.699	74.945	55.403	6	4-
5319	PLA2G1B	110	67	490	17	244	59	246	88	220	392	190	30	-11.2366	-1.68783	20.8597	4.94192e-06	6.08036e-05	0.00720244	1.47988e-97	9.06182e-18	1.7956e-14	1.27496e-08	1.0527e-28	12.714	8.18	52.654	2.246	28.177	9.496	31.962	13.483	31.11	54.61	38.629	6.393	6	4-
51621	KLF13	6650	2182	8580	3421	6841	2665	6280	2679	7208	1971	2720	1207	-8.04448	-1.38415	17.5352	2.82037e-05	0.000292575	0	5.10535e-267	1.41556e-205	1.97786e-250	0	3.95386e-128	36.601	13.076	41.878	21.573	39.471	20.378	42.454	20.787	50.538	12.735	27.169	12.36	6	4-
30846	EHD2	4796	2772	15335	1686	9168	3290	8065	2743	6891	3659	2601	1480	-7.86852	-1.39378	17.2958	3.19901e-05	0.000327387	9.24982e-95	0	0	0	1.72274e-288	1.44707e-66	51.908	32.618	147.517	20.905	103.774	49.477	106.734	41.726	94.822	46.55	51.011	29.79	6	4-
306	ANXA3	1821	1469	4346	2802	4590	1559	3032	407	4129	390	4658	1220	-8.58827	-1.72262	23.8859	1.0222e-06	1.45267e-05	2.65249e-05	3.93923e-16	2.67345e-186	0	0	0	48.202	42.092	102.923	84.941	126.184	57.358	96.866	15.007	138.145	12.18	222.419	59.98	6	4-
6275	S100A4	2611	933	3355	817	4455	843	2596	642	2902	1695	2009	1009	-8.82966	-1.57837	22.5381	2.06021e-06	2.76672e-05	6.65546e-159	5.20489e-241	0	5.00582e-234	1.0455e-96	2.00147e-72	498.196	184.358	906.507	177.952	823.026	224.364	526.463	156.075	659.765	397.028	660.604	352.897	6	4-
85409	NKD2	668	255	960	167	1036	382	569	364	563	307	82	14	-10.3219	-1.49348	19.1461	1.21084e-05	0.000136569	3.02441e-37	5.82899e-97	2.93232e-36	9.05949e-07	3.67638e-23	3.5484e-12	15.78	6.526	20.265	4.518	25.449	12.542	16.261	11.997	16.828	8.55	3.497	0.614	6	4-
57477	SHROOM4	1283	795	3294	795	1830	886	2861	725	2652	594	1408	299	-9.14442	-1.65655	23.9951	9.65833e-07	1.38004e-05	3.10825e-20	2.97423e-239	2.97486e-29	2.43982e-251	0	1.69031e-168	8.438	7.26	19.273	5.989	15.873	8.097	22.963	6.692	22.155	4.594	20.511	4.485	6	4-
3133	HLA-E	63325	26557	53137	22629	115337	21811	46792	27652	69842	22695	31082	14708	-5.75689	-1.34991	16.5826	4.65752e-05	0.00046201	0	0	0	0	0	0	948.378	431.854	708.336	388.184	1803.31	453.865	854.012	580.502	1327.39	399.797	842.246	409.39	6	4-
11142	PKIG	1383	844	1989	661	2393	360	1280	652	1565	456	732	148	-9.47939	-1.64026	23.5285	1.23079e-06	1.72805e-05	4.97289e-23	2.40116e-91	2.35929e-256	2.09678e-33	1.46514e-163	2.50046e-91	58.344	38.469	75.21	31.941	104.539	21.132	65.17	38.39	83.36	22.716	55.627	11.58	6	4-
8434	RECK	974	475	2342	467	1387	425	1460	432	1047	911	996	157	-9.59765	-1.57091	21.5908	3.3747e-06	4.34303e-05	5.94127e-33	2.53205e-208	1.9656e-68	3.06504e-107	9.25372e-07	4.10361e-147	8.445	4.481	18.033	4.639	12.59	5.12	15.508	5.271	11.551	9.28	15.659	2.532	6	4-
5739	PTGIR	219	121	591	84	583	129	276	164	253	118	66	13	-11.0401	-1.60784	21.5718	3.40822e-06	4.37545e-05	3.35479e-06	2.19535e-69	4.32442e-45	6.30681e-05	6.13669e-15	4.44952e-09	4.311	2.583	10.379	1.894	11.955	3.529	6.594	4.514	6.311	2.736	2.348	0.476	6	4-
1071	CETP	95	23	213	95	175	13	267	163	103	34	81	17	-11.7561	-1.81865	25.7227	3.94161e-07	6.12847e-06	2.32453e-10	7.66485e-06	1.06187e-27	0.000173445	3.63103e-10	1.62365e-10	2.37	0.621	4.751	2.714	4.537	0.451	8.05	5.669	3.25	1	3.647	0.788	6	4-
283383	GPR133	2252	1109	5450	240	2597	1403	2075	288	2785	444	1127	355	-9.00019	-2.19995	37.6842	8.31747e-10	2.20713e-08	1.00261e-72	0	1.40333e-25	2.17517e-293	0	3.6824e-91	15.845	8.493	34.029	1.935	19.143	13.715	17.909	2.854	24.949	3.669	14.385	4.647	6	4-
10529	NEBL	1826	1416	4904	2110	3053	536	1927	827	2906	1094	3534	1087	-8.77452	-1.36343	16.7652	4.23027e-05	0.000422223	1.04652e-07	7.5815e-126	1.41017e-289	1.94269e-76	1.30783e-223	8.13736e-293	11.336	9.597	26.966	15.014	19.919	4.624	14.734	7.259	23.054	7.978	39.936	12.587	6	4-
55283	MCOLN3	253	156	495	73	235	24	176	113	193	57	226	41	-11.2882	-1.88535	28.4175	9.77779e-08	1.71602e-06	4.91982e-05	8.44628e-57	3.82969e-32	0.00916283	7.85545e-21	3.29193e-31	3.588	2.403	6.248	1.186	3.48	0.473	3.043	2.248	3.475	0.951	5.802	1.081	6	4-
3384	ICAM2	786	333	1362	496	1903	293	930	408	985	95	282	59	-9.93125	-1.96725	32.1553	1.42326e-08	2.952e-07	2.24376e-36	5.20722e-53	4.13528e-201	1.07252e-35	1.7753e-204	5.13706e-35	42.917	20.117	64.338	32.21	111.866	22.188	65.626	34.546	70.047	6.004	32.211	7.318	6	4-
1827	RCAN1	3377	1822	2004	877	3696	852	2852	760	2095	1128	2900	704	-9.40921	-1.46595	19.5563	9.76778e-06	0.000112825	4.68984e-84	6.56613e-50	1.20263e-267	6.35846e-237	1.24974e-85	2.69113e-308	65.297	38.212	34.564	19.423	74.457	22.894	66.953	20.553	51.338	25.689	101.361	25.298	6	3-
79839	CCDC102B	244	93	424	156	162	84	384	197	302	108	374	28	-11.6092	-1.56258	20.2258	6.88183e-06	8.19805e-05	2.43286e-14	8.06502e-17	0.0087026	1.75783e-10	8.14697e-26	3.8823e-77	4.992	1.549	10.242	2.86	2.593	1.981	9.015	6.052	5.878	3.957	10.379	1.328	6	3-
8638	OASL	412	231	564	261	828	129	285	148	331	97	188	47	-11.3848	-1.50916	19.6894	9.11074e-06	0.000106065	3.25793e-10	8.92599e-13	4.17681e-87	9.86887e-08	2.85222e-35	2.44956e-20	17.702	8.935	25.051	13.833	30.66	6.932	15.914	11.806	23.817	6.278	14.844	5.306	6	3-
4629	MYH11	11362	6029	20971	10394	21727	8735	9595	2974	8616	2090	5671	1425	-7.85091	-1.45062	18.9455	1.34506e-05	0.000149617	1.5792e-294	0	0	0	0	0	63.736	36.978	103.946	66.836	128.408	68.087	66.832	23.745	61.98	13.747	58.053	14.915	6	3-
5740	PTGIS	1484	521	5572	740	2517	1054	2729	1772	1966	1567	639	156	-9.51669	-1.39305	16.8811	3.97964e-05	0.000400636	1.89024e-93	0	2.45661e-63	4.83733e-27	1.80085e-20	2.63955e-68	10.028	3.832	33.409	5.729	17.821	9.896	22.627	16.869	16.916	12.435	7.834	1.961	6	3-
57605	PITPNM2	1210	577	2142	608	1883	415	1627	551	1878	1335	635	330	-9.96811	-1.3035	15.5837	7.89305e-05	0.000735743	6.40855e-43	1.40822e-126	8.06487e-144	7.60416e-99	2.39499e-33	1.45714e-21	6.724	3.491	10.557	3.871	10.97	3.204	11.105	4.317	13.295	8.71	6.404	3.412	6	3-
2702	GJA5	698	444	2673	1306	3258	591	1504	1661	2100	439	999	209	-9.73876	-1.39061	16.1295	5.91549e-05	0.000569309	1.63266e-10	2.30861e-46	1.08043e-300	9.67009e-08	2.22599e-291	1.60568e-121	9.057	6.26	30.855	44.21	44.169	10.656	37.407	44.3	58.369	9.556	23.474	5.043	6	3-
25802	LMOD1	1020	617	3151	987	2837	895	1395	634	1460	840	641	135	-9.8221	-1.327	16.0373	6.21074e-05	0.000593641	7.09603e-18	3.02086e-159	3.12779e-132	5.70156e-49	4.11584e-51	1.85809e-77	9.946	6.543	27.296	11.026	28.944	12.126	16.647	8.694	18.106	9.625	11.329	2.448	6	3-
11067	C10orf10	5387	1696	3536	1486	7649	2052	3227	2052	16374	1916	1605	810	-8.63713	-1.52237	19.9317	8.02576e-06	9.42174e-05	0	4.37462e-97	0	2.03815e-35	0	2.47726e-57	108.594	37.074	63.603	34.311	160.589	57.487	78.926	57.828	418.188	45.5	58.471	30.343	6	3-
3590	IL11RA	277	179	519	95	531	141	302	112	283	134	72	36	-11.5178	-1.37893	16.6095	4.59201e-05	0.000455727	0.000154933	1.72728e-50	3.3526e-33	1.53858e-16	3.88037e-16	0.00173958	11.09	7.728	18.697	4.354	21.946	7.848	14.431	8.223	14.249	6.35	5.284	3.307	6	3-
29126	CD274	1926	161	384	210	1257	177	567	927	619	156	962	665	-10.4231	-1.47472	16.2254	5.62345e-05	0.000545202	0	4.0165e-05	8.44406e-142	1.20593e-28	5.37676e-75	2.78792e-12	20.296	1.845	3.596	2.535	13.855	2.592	7.308	13.732	8.294	1.932	18.372	13.033	6	3-
2194	FASN	8386	5095	21488	6362	10607	3476	15502	7243	15827	4130	1985	1039	-7.88744	-1.29757	15.4019	8.69007e-05	0.000800371	3.09148e-136	0	0	0	0	1.4461e-64	36.798	24.35	83.579	31.986	48.817	21.191	83.628	44.836	88.509	21.27	15.813	8.484	6	3-
730	C7	16215	7820	23362	10261	21736	9859	23210	5848	7454	1952	7101	1391	-7.35654	-1.56701	21.8524	2.94442e-06	3.81974e-05	0	0	0	0	0	0	155.29	81.451	198.753	112.582	217.825	131.19	272.084	78.773	90.801	21.968	123.275	24.778	6	3-
3241	HPCAL1	1973	1043	3447	489	3518	945	2094	927	3066	1061	1496	790	-9.36584	-1.49601	19.9964	7.75867e-06	9.13374e-05	1.46776e-52	0	4.45358e-210	2.15365e-77	3.04883e-263	1.12087e-47	61.468	35.123	96.224	17.445	113.613	40.923	78.439	40.105	120.472	39.025	83.925	45.674	6	3-
6405	SEMA3F	1498	705	2089	1027	2072	647	1543	732	1533	541	374	125	-9.847	-1.28251	15.0992	0.000102008	0.000924899	1.9315e-54	8.52394e-36	1.8634e-98	1.41609e-48	6.02098e-129	1.81717e-28	16.561	8.473	20.529	13.007	23.955	9.939	20.855	11.373	21.546	7.031	7.492	2.57	6	3-
6441	SFTPD	9226	5199	7849	808	7616	3269	6598	4339	6497	1231	6828	1204	-8.29779	-1.76363	25.6208	4.15525e-07	6.40843e-06	8.16581e-198	0	8.7505e-177	9.89756e-60	0	0	323.981	197.155	247.504	32.489	276.702	159.585	277.659	211.202	287.45	51.106	431.464	78.472	6	3-
79875	THSD4	1175	634	1615	1068	1301	769	1316	291	1571	290	964	359	-9.97366	-1.32886	15.2938	9.2017e-05	0.000842319	4.43354e-30	1.9913e-05	3.93309e-08	7.14849e-133	3.52882e-237	5.2524e-62	4.77	2.804	5.811	4.968	5.54	4.337	6.57	1.667	8.129	1.382	7.105	2.712	6	3-
57447	NDRG2	2166	1103	4355	1762	4209	1034	3372	678	2721	855	1414	830	-9.10356	-1.46844	19.4422	1.0369e-05	0.000118931	3.67201e-64	1.60221e-131	3.42859e-282	0	8.29806e-262	3.39086e-33	49.093	27.087	88.143	45.739	99.256	32.57	92.538	21.446	78.038	22.836	57.858	34.94	6	3-
58484	NLRC4	370	71	468	118	390	169	296	179	339	157	179	102	-11.2591	-1.32024	15.1672	9.84004e-05	0.000895285	2.09566e-45	3.27318e-33	5.8143e-10	4.69886e-05	9.72847e-20	1.62414e-05	4.507	0.94	5.07	1.647	4.965	2.86	4.404	3.062	5.247	2.249	3.95	2.31	6	3-
4900	NRGN	545	184	1088	105	996	183	587	284	1229	315	282	547	-10.4545	-1.58701	19.6214	9.44057e-06	0.00010954	4.43531e-37	8.32837e-158	2.667e-91	4.50614e-18	6.8207e-145	5.79797e-20	46.211	17.947	37.326	18.715	70.019	19.571	85.296	46.402	200.943	43.849	62.563	81.326	6	3-
153090	DAB2IP	1467	610	2868	1309	1802	558	1557	653	2006	595	778	415	-9.61994	-1.29095	15.2901	9.21965e-05	0.000843594	4.57878e-69	1.9032e-62	8.46668e-87	5.01414e-65	2.60546e-205	1.1815e-24	33.327	17.696	41.005	29.8	51.269	15.321	43.579	17.525	56.305	15.756	25.137	17.359	6	3-
25975	EGFL6	1112	380	1056	437	1139	517	1736	887	561	143	774	274	-10.2885	-1.35319	16.4824	4.91035e-05	0.000483207	7.12014e-73	5.59913e-31	3.35007e-23	1.33813e-44	3.05653e-67	3.52868e-54	18.661	6.961	15.717	8.407	20.071	12.06	35.928	21.101	12.046	3.584	23.668	9.288	6	3-
389136	VGLL3	932	467	2701	675	843	309	1058	678	1248	879	1351	136	-10.0648	-1.40809	17.0774	3.58872e-05	0.000363899	2.48642e-29	1.97721e-188	6.33662e-30	6.88542e-12	2.5369e-23	1.08198e-248	3.316	1.81	8.515	2.752	3.147	1.527	4.631	3.405	5.661	3.67	8.728	0.9	6	3-
57863	CADM3	564	158	683	124	440	174	489	337	137	81	132	45	-11.2744	-1.37156	16.2614	5.51772e-05	0.000536438	4.19669e-48	3.67359e-67	8.36263e-14	0.000359998	2.33618e-05	1.83345e-10	7.617	2.347	8.109	1.92	6.307	3.264	8.306	6.546	2.393	1.28	3.277	1.138	6	3-
85360	SYDE1	316	192	896	171	940	220	644	307	603	466	215	62	-10.8717	-1.3606	16.3659	5.22151e-05	0.00051024	3.22211e-06	1.13445e-83	1.14173e-67	1.24877e-20	3.41463e-08	4.04211e-20	3.818	2.521	9.628	2.367	11.872	3.694	9.505	5.21	9.259	6.621	4.706	1.393	6	3-
66000	TMEM108	180	63	565	88	487	118	355	148	516	178	172	317	-11.3285	-1.36319	15.1218	0.000100791	0.000915452	2.7649e-12	1.71954e-62	2.77606e-34	1.41563e-15	2.00984e-45	1.00753e-10	4.04	2.442	9.768	2.062	10.818	5.391	14.206	2.14	9.302	8.05	13.893	16.785	6	3-
10979	FERMT2	1194	674	2091	741	1456	503	1603	652	1711	976	1457	240	-9.89992	-1.37469	17.0632	3.61561e-05	0.00036645	1.23251e-26	2.77894e-85	9.38853e-58	3.14892e-71	3.18726e-61	9.7223e-209	34.541	24.066	50.229	25.611	43.659	19.716	40.896	19.152	45.351	23.604	64.33	14.588	6	3-
146691	TOM1L2	2722	1968	5885	1691	3949	1423	3097	1111	3272	930	1528	819	-9.14132	-1.27987	14.9488	0.000110467	0.000992594	1.44214e-18	0	4.42598e-142	2.06726e-171	0	7.97532e-47	28.116	19.002	37.937	26.311	34.408	27.11	35.889	15.007	42.088	9.062	37.998	18.591	6	3-
1959	EGR2	1237	187	1957	434	965	285	1681	340	634	385	846	190	-10.2748	-1.93169	32.2891	1.32854e-08	2.76922e-07	2.2932e-175	1.40306e-156	7.09665e-51	4.83056e-183	9.68064e-20	4.32906e-97	19.276	4.492	26.978	13.539	15.59	9.194	43.03	7.535	17.632	11.875	23.699	5.468	6	3-
26524	LATS2	2015	673	2001	833	2217	856	1987	750	1813	1039	1066	352	-9.25607	-1.29617	15.546	8.05217e-05	0.000749246	8.23156e-136	7.43491e-57	8.30681e-69	2.70028e-101	7.64798e-64	3.30319e-81	13.732	4.992	12.1	6.504	15.83	8.105	16.614	7.201	15.732	8.315	13.18	4.463	6	3-
80833	APOL3	2061	650	2061	1142	4883	759	2704	1479	2218	612	1610	1085	-8.94645	-1.37337	16.5545	4.72723e-05	0.00046819	2.19282e-150	2.18852e-21	0	1.31403e-55	3.06033e-244	2.58078e-22	44.867	15.297	40.016	28.47	110.458	22.975	71.133	44.785	60.854	15.677	63.035	43.725	6	3-
9535	GMFG	1360	311	951	449	2008	583	1540	922	1178	339	780	434	-9.61753	-1.35153	16.2453	5.56475e-05	0.00054026	1.01626e-141	1.9741e-19	2.12537e-107	6.31498e-23	7.91591e-125	4.72884e-22	122.27	29.742	78.601	46.167	182.361	72.945	158.773	111.434	130.778	36.507	124.241	72.088	6	3-
90865	IL33	895	439	2313	634	938	273	1169	391	884	172	1713	955	-9.62483	-1.52708	20.781	5.14924e-06	6.30586e-05	9.15948e-30	2.81075e-143	1.42267e-50	6.83898e-73	7.55076e-130	4.46755e-47	27.008	10.964	39.11	22.905	21.905	12.142	46.975	14.808	29.025	4.805	64.355	39.211	6	3-
6693	SPN	2037	298	2063	422	1763	733	1519	821	1878	320	739	424	-9.4359	-1.71327	24.5537	7.22664e-07	1.05853e-05	3.50658e-293	2.87443e-179	1.49755e-45	6.32902e-33	4.81863e-298	3.83776e-19	29.94	9.646	42.072	8.688	36.231	24.577	69.491	40.832	86.055	6.667	35.752	21.112	6	3-
6505	SLC1A1	711	369	2944	684	1697	751	1376	743	1787	125	1356	209	-9.45647	-1.84718	27.5025	1.56893e-07	2.65365e-06	1.1065e-20	2.75762e-223	1.24411e-36	6.71085e-30	0	3.98543e-202	7.351	4.148	27.046	8.101	18.352	10.788	17.402	10.799	23.493	1.519	25.407	4.019	6	3-
2318	FLNC	1798	303	2991	554	1720	709	834	451	938	708	275	27	-9.57665	-1.74472	25.0011	5.72981e-07	8.59063e-06	1.76948e-237	4.92008e-284	1.62764e-45	1.86717e-18	1.8085e-13	8.89545e-52	7.473	1.374	11.013	2.639	7.508	4.094	5.035	2.706	4.982	4.297	2.08	0.209	6	3-
26508	HEYL	1423	873	1990	800	2218	861	2478	533	1067	660	988	187	-9.903	-1.40028	17.5431	2.80863e-05	0.000291703	3.46972e-23	1.38768e-61	8.31083e-68	1.42677e-255	4.53032e-31	1.60054e-129	13.285	8.865	16.503	8.557	21.671	11.169	28.324	7	12.672	7.24	16.722	3.247	6	2-
11346	SYNPO	2909	1165	5650	1136	3643	1789	3882	1306	4196	2424	1220	614	-8.87174	-1.29316	15.3081	9.13256e-05	0.000836719	6.59454e-146	0	4.29016e-54	1.02666e-237	1.44385e-143	4.6272e-44	55.055	28.657	86.827	22.438	87.092	43.94	81.414	31.535	91.769	49.207	70.631	38.241	6	2-
51421	AMOTL2	1390	805	5897	1104	2979	1271	2036	956	2660	1488	1385	397	-9.29551	-1.31577	15.7296	7.30729e-05	0.000686879	3.83764e-28	0	6.42985e-71	1.50549e-65	3.90485e-99	3.54036e-125	10.627	6.697	40.019	9.67	23.854	13.501	19.085	10.292	25.887	13.363	19.206	5.646	6	2-
4973	OLR1	2957	337	1924	263	1562	791	779	385	1146	881	1437	680	-9.42634	-1.50306	18.8972	1.37952e-05	0.000152964	0	6.39703e-230	4.7473e-21	1.77774e-22	7.5316e-15	1.03427e-59	121.368	12.569	63.706	18.555	57.414	43.894	37.402	22.196	60.614	44.431	72.101	37.318	6	2-
146894	CD300LG	6	3	50	0	58	0	33	3	71	6	17	0	-14.0853	-4.26903	69.6217	7.18422e-17	6.91729e-15	0.659754	1.95677e-12	2.39391e-14	8.62114e-07	3.02618e-16	4.63036e-05	2.57	0.992	9.097	0.324	13.788	0.081	8.064	0.498	20.018	0.847	6.076	0.498	5	6-
23114	NFASC	219	52	426	75	133	69	255	84	165	41	65	25	-11.5279	-1.72039	24.3442	8.05678e-07	1.16629e-05	9.60153e-23	1.54993e-43	0.0157594	6.47047e-17	1.04383e-20	8.7686e-05	6.784	2.357	11.304	3.809	6.05	2.222	7.351	2.779	6.946	1.242	3.882	1.073	5	6-
80332	ADAM33	437	100	870	117	844	136	446	95	164	135	134	30	-10.7484	-2.02864	34.0192	5.45718e-09	1.23036e-07	2.77988e-46	2.9678e-105	7.923e-87	3.59283e-47	0.0224168	3.94356e-16	8.799	2.256	12.872	2.796	17.366	4.394	6.286	2.024	3.8	1.815	4.562	0.64	5	6-
388125	C2CD4B	226	30	96	74	194	33	125	51	131	60	89	11	-12.4343	-1.80406	25.0024	5.72591e-07	8.59063e-06	3.04847e-35	1	1.29321e-19	1.64061e-06	1.41734e-08	1.4356e-15	6.25	0.898	2.376	2.343	5.569	1.268	4.168	1.963	4.576	1.958	4.438	0.565	5	5-
90246	LOC90246	72	87	168	51	179	20	138	30	114	38	78	16	-12.5567	-1.73524	23.2291	1.43805e-06	1.99107e-05	0.192684	5.61275e-10	1.04339e-23	1.15e-14	2.09426e-11	2.55939e-10	1.042	1.368	2.165	0.846	2.706	0.402	2.436	0.609	2.096	0.647	2.044	0.431	5	5-
3553	IL1B	791	79	332	215	1483	154	1735	389	499	194	1608	170	-10.513	-2.30823	41.8779	9.71542e-11	3.06196e-09	9.56406e-139	0.0409058	9.71018e-200	2.51374e-172	1.39953e-37	2.24396e-289	23.263	2.513	8.747	7.241	45.238	6.296	61.436	15.909	18.529	6.736	85.237	9.284	5	5-
59350	RXFP1	84	23	296	24	142	3	279	14	129	4	149	20	-12.3932	-3.67071	87.3374	9.15018e-21	1.54889e-18	2.07594e-08	1.16773e-46	2.20497e-30	2.56555e-58	2.99219e-35	1.08182e-24	1.415	0.42	4.442	0.463	2.494	0.07	5.716	0.33	2.756	0.079	4.539	0.626	5	5-
54438	GFOD1	286	56	555	76	385	110	408	133	439	55	71	9	-11.5987	-2.36753	44.3729	2.71425e-11	9.33968e-10	7.01732e-35	4.28867e-67	6.78188e-22	1.03983e-26	1.84504e-82	2.16725e-12	3.734	0.794	6.446	1.137	5.252	1.996	6.501	2.437	7.281	0.844	1.679	0.218	5	5-
115727	RASGRP4	327	58	473	76	436	144	224	60	294	99	70	42	-11.7134	-1.79218	26.8027	2.25327e-07	3.70951e-06	9.2698e-43	4.13412e-51	1.184e-19	4.41236e-19	3.05711e-27	0.0224645	5.781	1.106	7.495	1.538	7.98	3.538	4.746	1.468	6.535	2.065	2.222	1.375	5	5-
284654	RSPO1	138	24	401	38	354	31	157	46	212	14	86	6	-12.1375	-3.07473	67.7025	1.90121e-16	1.72011e-14	3.83355e-19	9.00147e-59	2.80196e-52	2.94423e-12	8.96511e-50	1.93525e-18	1.826	0.345	4.721	0.576	4.894	0.57	2.535	0.854	3.564	0.218	2.061	0.148	5	5-
56729	RETN	87	14	314	25	61	19	23	1	52	2	3	3	-13.0518	-2.82828	43.4937	4.25334e-11	1.41486e-09	1.36688e-12	2.93868e-50	0.00081827	1.02735e-05	1.52624e-13	1	19.36	3.2	68.159	6.347	12.975	5.902	5.318	0.279	13.638	0.551	1.141	1.221	5	5-
80704	SLC19A3	168	164	938	87	929	121	491	120	592	109	448	57	-11.1068	-2.30833	41.5776	1.13284e-10	3.53842e-09	0.977596	1.15153e-138	1.46872e-110	2.06357e-45	9.88115e-90	3.29754e-74	1.728	1.834	8.573	1.025	9.995	1.729	6.178	1.735	7.743	1.318	8.351	1.09	5	5-
8787	RGS9	28	15	106	16	246	16	76	31	146	15	49	16	-12.918	-2.26253	35.6547	2.35577e-09	5.72974e-08	0.183638	7.43867e-13	1.75432e-40	0.000374059	1.72714e-30	0.000146506	0.778	0.455	3.806	0.75	9.37	0.618	3.458	1.522	6.797	0.491	4.275	0.831	5	5-
57007	CXCR7	2824	375	3313	421	1402	453	1393	465	950	1109	592	120	-10.0471	-1.83603	27.5403	1.53854e-07	2.60855e-06	0	0	3.7452e-63	1.26161e-86	0.222941	6.93587e-74	55.257	7.958	57.829	9.436	28.579	12.318	33.087	12.724	23.556	25.56	20.938	4.364	5	5-
7482	WNT2B	140	52	183	24	175	62	78	29	137	28	36	12	-12.6886	-1.81383	25.7824	3.82162e-07	5.97288e-06	4.12179e-09	6.27011e-23	1.93029e-07	7.25516e-05	6.40217e-20	0.00182049	3.26	1.312	3.807	0.64	4.238	2.007	2.198	0.942	4.037	0.769	1.514	0.519	5	5-
152573	SHISA3	42	22	187	35	113	4	93	16	97	36	143	24	-12.8518	-2.30764	39.0431	4.14547e-10	1.15097e-08	0.0520276	1.58977e-18	4.91362e-22	9.17824e-12	1.82201e-08	5.49758e-21	0.891	0.506	3.542	0.85	2.496	0.118	2.392	0.474	2.606	0.9	5.481	0.946	5	5-
23237	ARC	458	21	425	22	387	19	262	19	629	26	49	0	-11.8033	-4.3966	122.545	1.75414e-28	8.85668e-26	2.43897e-101	4.21492e-77	5.03134e-69	8.30981e-50	4.39575e-163	1.9319e-14	6.083	0.303	5.022	0.335	5.37	0.351	4.246	0.354	10.612	0.406	1.178	0	5	5-
60370	AVPI1	1131	452	863	227	1472	353	761	199	773	343	210	155	-10.7064	-1.44368	18.6639	1.55903e-05	0.00017138	1.48675e-57	2.77309e-57	1.85223e-102	3.77566e-65	5.87631e-47	0.014326	35.463	15.321	24.26	8.151	47.832	15.386	28.684	8.668	30.58	12.704	11.862	9.023	5	5-
6532	SLC6A4	126	45	4192	275	11701	7	1558	4	9838	2	1194	24	-9.32078	-6.67684	181.764	1.99641e-41	5.23808e-38	1.20224e-08	0	0	0	0	7.66935270297177e-313	1.065	0.414	31.456	2.663	103.527	0.082	16.132	0.048	105.798	0.02	18.297	0.377	5	5-
94274	PPP1R14A	53	36	386	107	619	85	363	95	325	40	137	17	-11.8702	-2.16504	36.8012	1.3081e-09	3.3241e-08	0.198783	2.11394e-24	9.25231e-72	2.31811e-31	1.86558e-61	1.26741e-23	4.246	3.076	28.306	9.805	50.302	9.474	33.605	10.286	32.263	3.829	19.497	2.518	5	5-
9173	IL1RL1	111	52	189	35	321	55	74	65	1565	6	141	18	-11.7192	-2.39309	38.1693	6.48658e-10	1.7478e-08	4.0518e-05	6.26116e-19	1.00425e-31	1	0	5.62942e-24	10.129	5.613	17.939	4.211	33.599	9.28	10.375	4.829	189.141	0.805	20.133	3.507	5	5-
64399	HHIP	428	135	1086	195	783	40	1544	1312	960	57	1071	230	-10.6275	-2.44115	43.802	3.63325e-11	1.22214e-09	3.66211e-32	1.30586e-106	5.18686e-138	0.167234	4.09826e-230	5.88903e-127	4.697	1.611	10.594	2.452	8.987	0.61	20.718	20.236	13.394	0.735	21.298	4.694	5	5-
140597	TCEAL2	42	23	68	12	200	12	136	10	125	37	85	14	-12.9561	-2.53006	44.971	1.99975e-11	7.03096e-10	0.0723229	1.43857e-07	3.05549e-34	1.53824e-25	4.374e-14	7.23474e-13	1.781	1.051	2.597	0.582	8.745	0.707	6.869	0.585	6.658	1.858	6.47	1.101	5	5-
84935	C13orf33	995	195	519	133	1018	200	761	267	448	558	385	57	-10.9756	-1.74165	25.1592	5.27873e-07	7.977e-06	3.13676e-118	6.7098e-36	1.45557e-87	2.84263e-44	0.075391	1.04702e-59	16.899	3.594	7.855	2.587	18.032	4.72	15.722	6.351	9.651	11.156	11.827	1.799	5	5-
5648	MASP1	41	14	141	10	99	2	77	0	60	8	37	5	-13.3921	-3.55823	71.5493	2.70412e-17	2.82385e-15	0.00184932	6.8984e-24	1.58984e-21	4.00722e-22	7.38081e-12	1.53824e-06	1.776	0.654	5.52	0.496	4.416	0.121	3.967	0	3.273	0.574	2.885	0.745	5	5-
26084	ARHGEF26	971	833	2208	322	2117	154	1712	209	1847	627	2276	222	-10.0844	-2.44952	46.8586	7.62962e-12	2.89594e-10	0.0784339	1.18897e-252	0	1.4371e-259	1.32767e-162	0	7.126	6.653	14.381	2.707	16.273	1.57	15.408	2.16	17.255	5.404	30.297	3.031	5	5-
79762	C1orf115	947	830	2225	781	2879	406	1451	389	1594	224	667	171	-10.1561	-1.83307	28.1488	1.12337e-07	1.95195e-06	0.195566	4.68035e-92	0	4.6925e-120	1.16574e-281	4.35852e-68	12.555	11.955	26.245	11.861	39.874	7.479	23.474	7.238	26.843	3.493	16.012	4.215	5	5-
57595	PDZD4	406	88	363	75	380	82	300	84	263	99	58	32	-11.8849	-1.77578	26.7248	2.34588e-07	3.8459e-06	8.81128e-45	3.04275e-32	1.02376e-30	4.79794e-24	5.18542e-21	0.0176123	4.212	0.993	3.346	0.891	4.124	1.182	3.807	1.225	3.469	1.207	1.09	0.617	5	5-
8910	SGCE	740	748	1585	361	970	210	925	276	773	489	997	244	-10.5685	-1.42928	17.9179	2.30646e-05	0.000244879	0.231535	1.88926e-123	7.49355e-76	1.47839e-67	1.97313e-21	1.68984e-105	30.9	32.843	60.821	19.862	66.108	8.389	104.208	24.549	78.518	16.548	106.204	23.217	5	5-
1361	CPB2	36	15	223	4	213	104	166	75	171	1	189	6	-12.3628	-2.99999	51.5304	7.04977e-13	3.21684e-11	0.0183315	1.66615e-49	0.000301393	1.33656e-06	8.39961e-53	3.52089e-47	2.297	0.957	9.678	0.471	10.832	8.801	10.03	4.389	9.107	0.038	14.394	0.535	5	5-
10223	GPA33	188	31	721	589	394	72	155	13	488	36	89	28	-11.5166	-2.33595	39.3019	3.63094e-10	1.02026e-08	5.23883e-26	0.657956	1.19813e-36	3.02465e-28	2.70691e-110	5.27793e-08	2.687	0.481	9.173	9.644	5.881	1.43	2.701	0.261	8.857	0.605	2.303	0.744	5	5-
56920	SEMA3G	200	76	512	176	3767	151	1093	168	3664	292	374	66	-10.1926	-2.69576	55.1636	1.10901e-13	5.81954e-12	3.38978e-12	6.30746e-23	0	2.94925e-145	0	3.51362e-52	1.627	0.673	3.698	1.641	32.092	1.707	10.898	1.924	37.938	2.791	5.518	0.999	5	5-
1440	CSF3	2463	44	142	7	732	8	54	26	537	31	641	11	-11.0009	-4.71358	122.074	2.22378e-28	1.08552e-25	0	2.33955e-26	2.38538e-162	0.0218002	4.48587e-129	1.55514e-171	79.407	1.542	4.059	0.259	24.709	0.668	2.107	1.287	21.826	1.174	37.201	0.658	5	5-
340419	RSPO2	97	61	488	67	192	20	266	108	276	60	123	4	-11.9812	-2.3511	41.2053	1.37053e-10	4.18131e-09	0.0221594	8.20018e-59	1.61937e-26	1.3871e-12	3.30798e-38	1.10727e-30	1.215	0.83	5.436	0.961	2.513	0.348	4.068	1.899	4.392	0.884	2.79	0.093	5	5-
23127	GLT25D2	208	60	357	113	300	46	308	101	221	63	156	22	-11.8773	-2.00904	33.7262	6.34403e-09	1.4136e-07	8.03102e-18	8.95698e-19	1.37304e-32	1.78689e-20	3.93385e-24	3.49057e-25	1.526	0.479	2.325	0.95	2.306	0.469	2.771	1.044	2.064	0.543	2.076	0.3	5	5-
51744	CD244	116	16	129	47	242	67	134	130	154	36	126	33	-12.3406	-1.64514	21.2929	3.94182e-06	4.96334e-05	2.70979e-18	5.70538e-06	9.76184e-15	0.80484	1.43903e-20	2.71991e-13	2.296	0.53	2.293	1.065	4.959	1.839	3.198	5.792	4.006	1.414	6.577	1.208	5	5-
6751	SSTR1	69	38	997	184	521	18	1345	69	553	7	306	40	-11.1253	-3.46301	78.4593	8.16646e-19	1.04521e-16	0.0111118	1.23097e-95	5.76719e-101	7.47991e-279	1.02341e-164	8.79417e-51	0.611	0.366	7.836	1.866	4.826	0.221	14.579	0.859	6.227	0.073	4.91	0.658	5	5-
56000	NXF3	45	3	198	22	628	24	225	24	300	6	83	13	-12.0959	-3.76623	90.1788	2.1758e-21	4.18992e-19	3.40727e-10	3.39431e-27	4.65509e-119	5.04839e-37	2.76968e-85	6.11673e-13	0.987	0.071	3.879	0.553	14.342	0.732	5.982	0.735	8.333	0.155	3.289	0.53	5	5-
8406	SRPX	244	86	583	97	312	78	409	48	163	206	165	19	-11.6243	-1.95401	29.8912	4.56992e-08	8.56451e-07	4.56981e-16	1.62618e-61	2.03356e-21	1.17573e-63	0.25613	2.65399e-29	8.53	3.338	18.061	3.897	11.595	3.795	18.334	2.495	7.552	8.505	10.835	1.263	5	5-
80726	KIAA1683	341	381	451	56	375	51	333	61	197	36	133	32	-11.6091	-2.10145	34.2789	4.77533e-09	1.09188e-07	0.0342127	1.18122e-57	5.40314e-44	1.33073e-39	1.55517e-30	4.30569e-15	3.711	4.528	4.363	0.699	4.28	0.835	5.108	0.943	2.748	0.461	2.642	0.651	5	5-
359845	FAM101B	828	176	1182	218	904	196	1632	509	685	672	496	157	-10.4686	-1.67585	24.3122	8.19198e-07	1.18341e-05	5.9623e-92	5.41096e-113	7.34564e-71	8.38349e-112	0.067755	2.56086e-40	8.234	1.903	10.443	2.484	9.406	2.708	19.86	7.118	8.663	7.854	8.94	2.904	5	5-
222487	GPR97	823	45	190	42	325	111	150	96	340	30	87	10	-11.6935	-2.4545	42.4367	7.30059e-11	2.36116e-09	4.65599e-175	5.05811e-16	4.05599e-14	0.0165143	3.80952e-73	1.01694e-15	12.337	0.733	2.536	0.721	5.086	2.312	2.74	2.018	6.47	0.529	2.36	0.279	5	5-
10350	ABCA9	562	176	816	216	792	297	920	310	300	277	739	108	-10.7968	-1.53185	20.3508	6.44658e-06	7.71898e-05	4.3314e-42	8.03685e-54	6.25398e-27	6.16034e-57	0.0672576	7.04741e-114	3.353	1.143	4.318	1.476	4.952	2.462	6.739	2.607	2.28	1.94	8	1.199	5	5-
6556	SLC11A1	2467	223	4454	383	4290	1329	1572	487	2446	932	488	492	-9.53031	-1.91608	28.9549	7.40831e-08	1.32228e-06	0	0	2.28549e-205	6.23268e-109	5.09698e-185	1	24.738	2.432	39.683	4.4	45.006	18.517	19.288	6.867	31.193	10.983	8.869	9.176	5	5-
148	ADRA1A	30	7	94	8	74	5	57	4	105	13	16	1	-13.3858	-3.28303	60.9536	5.84375e-15	3.90638e-13	0.000367212	4.45931e-15	7.85454e-13	5.16794e-11	4.19108e-20	0.000729791	1.841	0.205	3.083	0.611	3.938	0.261	2.841	0.35	3.338	0.385	5.092	0.525	5	5-
6445	SGCG	36	8	224	18	151	3	64	1	65	8	89	3	-12.9044	-3.93023	87.592	8.045e-21	1.39557e-18	5.17452e-05	2.09771e-35	1.27251e-32	1.36636e-15	3.9681e-13	3.71806e-22	0.934	0.225	5.2	0.535	4.071	0.108	2.006	0.036	2.133	0.245	4.168	0.145	5	5-
4969	OGN	704	239	1829	303	757	213	960	124	369	393	639	90	-10.6139	-1.91924	30.2949	3.71093e-08	7.06829e-07	2.77161e-47	8.36617e-191	3.12776e-43	8.334e-142	0.871096	2.15423e-100	10.42	3.838	24.098	5.137	11.695	4.379	17.314	2.57	6.922	6.834	17.088	2.472	5	5-
114800	CCDC85A	145	35	556	47	530	23	391	56	604	164	308	42	-11.4389	-2.8894	64.6266	9.05231e-16	7.06349e-14	3.25459e-15	1.4098e-85	6.29026e-98	5.66183e-55	2.79004e-68	4.9571e-50	1.408	0.37	4.795	0.523	5.384	0.31	4.646	0.765	7.458	1.871	5.42	0.758	5	5-
5028	P2RY1	141	52	524	109	191	70	488	111	390	98	133	36	-11.6525	-1.82574	28.4013	9.85967e-08	1.7275e-06	2.87562e-09	8.31879e-46	1.37157e-07	3.52423e-48	3.26392e-47	1.46686e-13	1.783	0.714	5.893	1.579	2.523	1.23	7.533	1.97	6.265	1.457	3.045	0.846	5	5-
347694	ECEL1P2	43	13	118	14	198	16	143	9	176	23	198	28	-12.5252	-2.99476	63.3823	1.70238e-15	1.23217e-13	0.000448589	2.53155e-16	4.25434e-30	3.67966e-28	1.94713e-32	9.20116e-32	1.495	0.488	3.684	0.557	7.125	0.774	5.961	0.434	7.713	0.946	12.392	1.807	5	5-
6457	SH3GL3	37	7	106	5	103	2	69	5	96	2	65	8	-13.1871	-3.9504	85.662	2.13476e-20	3.44681e-18	1.12282e-05	5.31355e-20	1.20486e-22	2.1861e-13	4.23611e-28	1.53609e-11	0.931	0.269	2.282	0.139	2.622	0.067	2.064	0.172	3.014	0.057	2.875	0.362	5	5-
84417	C2orf40	262	63	303	209	197	47	99	35	291	44	117	41	-11.7354	-1.68631	23.0272	1.59723e-06	2.19258e-05	6.07417e-27	0.222926	2.05189e-14	1.19738e-06	5.19595e-50	4.77708e-09	18.16	4.671	19.137	16.575	13.917	4.532	7.999	3.299	25.095	3.635	14.452	5.259	5	5-
84976	DISP1	479	442	2852	635	1625	556	1385	308	1166	423	1200	262	-9.84301	-1.58081	21.8489	2.94993e-06	3.82452e-05	0.986773	5.58339e-227	9.66386e-66	8.87887e-139	7.481e-95	1.87633e-140	3.693	3.708	19.517	5.609	13.12	5.955	13.09	3.343	11.442	3.83	16.779	3.757	5	5-
9002	F2RL3	653	189	172	55	1857	71	343	48	896	75	26	10	-10.7903	-2.66115	50.7344	1.05749e-12	4.7429e-11	1.13434e-53	2.95346e-09	0	4.0009e-49	1.00471e-194	0.0243212	9.569	3.008	2.244	0.923	28.412	1.446	6.127	0.986	16.67	1.293	0.69	0.272	5	5-
161753	ODF3L1	145	61	73	22	117	18	40	6	145	10	33	2	-12.8006	-2.50314	41.9215	9.5012e-11	3.008e-09	8.2159e-08	7.48487e-05	3.86932e-13	6.432e-06	1.4671e-34	1.37423e-07	5.353	2.431	2.422	0.93	4.465	0.924	1.767	0.307	6.74	0.437	2.191	0.137	5	5-
4211	MEIS1	698	571	1818	632	1622	395	1587	615	1266	377	1029	206	-10.0221	-1.5094	20.1529	7.14932e-06	8.47341e-05	0.0206264	7.60338e-77	1.11745e-110	3.843e-77	1.70479e-129	1.72597e-129	8.596	7.642	19.911	8.916	20.876	6.759	23.867	10.635	19.81	5.459	22.952	4.717	5	5-
55214	LEPREL1	1568	713	2827	313	1870	1386	2014	612	2398	780	1896	300	-9.58911	-1.75957	25.8226	3.74276e-07	5.87148e-06	1.97512e-61	0	0.539354	8.06594e-143	6.50713e-222	1.19564e-278	21.917	10.826	35.167	5.012	27.298	26.92	34.332	12.001	42.564	12.825	47.979	7.797	5	5-
64411	ARAP3	1219	1149	2645	531	3176	536	2348	518	1974	522	802	305	-9.64789	-1.72089	25.5372	4.33935e-07	6.66297e-06	1	2.2946e-233	3.01876353607043e-311	8.88604e-237	4.46242e-226	4.44462e-50	8.767	8.993	16.882	4.375	23.928	5.356	20.712	5.247	18.074	4.409	10.463	4.081	5	5-
5137	PDE1C	41	25	203	37	128	13	129	9	184	32	88	4	-12.5163	-2.75277	52.4411	4.43344e-13	2.07718e-11	0.161512	8.67485e-21	7.61371e-18	1.80833e-24	1.06691e-29	8.02759e-21	0.989	0.653	4.378	1.022	3.211	0.436	3.764	0.303	5.617	0.91	3.833	0.179	5	5-
11197	WIF1	978	1027	4783	143	3051	168	1980	101	4433	120	1908	287	-9.45981	-3.66839	84.7025	3.46817e-20	5.39237e-18	0.0245842	0	0	0	0	6.87559e-289	17.91	20.405	78.098	3	58.24	4.276	44.062	2.589	102.926	2.588	63.18	9.769	5	5-
157869	C8orf84	133	72	620	201	245	50	238	46	453	45	252	35	-11.5319	-2.16722	37.4339	9.45648e-10	2.47805e-08	0.000289095	1.54639e-30	3.22611e-21	1.32771e-27	6.50825e-94	1.19588e-40	1.357	0.799	5.62	2.349	2.614	0.709	2.97	0.66	5.876	0.539	4.659	0.664	5	5-
2852	GPER	160	45	381	37	584	30	159	45	915	53	49	18	-11.3956	-2.79017	55.6345	8.72784e-14	4.66151e-12	1.45867e-14	1.33134e-55	2.43361e-102	2.07529e-13	4.73698e-220	0.000526166	2.681	0.818	5.688	0.71	10.206	1.111	3.241	1.056	19.447	1.045	1.485	0.561	5	5-
388121	TNFAIP8L3	364	106	336	98	374	78	282	82	112	102	205	57	-11.5156	-1.56482	21.0848	4.39391e-06	5.467e-05	3.69107e-30	5.71828e-20	5.98308e-31	6.24198e-22	0.251618	5.83664e-20	6.494	2.052	5.344	2.003	6.957	1.934	6.116	2.048	2.534	2.143	6.614	1.89	5	5-
283849	EXOC3L1	195	57	439	68	761	67	423	141	398	71	55	9	-11.3149	-2.39308	45.3625	1.63738e-11	5.90526e-10	2.05972e-16	6.77713e-49	4.56497e-111	4.92596e-27	8.70319e-62	1.42163e-08	3.147	0.999	6.311	1.257	12.814	1.503	8.31	3.189	8.15	1.349	1.606	0.27	5	5-
1776	DNASE1L3	499	71	1302	83	380	27	217	83	47	3	81	27	-11.2655	-2.8031	55.9369	7.48331e-14	4.07986e-12	1.06699e-73	1.40045e-221	7.30816e-61	1.98916e-11	3.28665e-11	6.802e-07	15.107	2.324	35.323	2.878	11.928	1.136	7.904	3.493	1.796	0.107	4.419	1.518	5	5-
6442	SGCA	95	58	311	37	196	32	110	38	149	26	27	2	-12.2243	-2.19439	35.3643	2.73447e-09	6.54152e-08	0.0158787	5.81932e-41	1.93342e-20	3.17371e-07	9.42077e-24	5.38246e-06	7.262	5.276	22.34	3.552	19.062	4.07	14.145	5.291	16.315	2.154	9.443	1.611	5	5-
89846	FGD3	1102	203	900	349	1071	365	784	715	745	184	393	162	-10.3601	-1.42548	17.3758	3.06709e-05	0.000314808	7.55962e-137	4.25321e-31	6.33952e-44	1	2.38798e-91	6.38393e-22	14.243	2.851	10.348	5.167	14.463	6.555	12.368	12.972	12.232	2.797	9.198	3.893	5	5-
2867	FFAR2	231	41	107	73	411	59	123	52	148	35	63	28	-11.9867	-1.6917	22.7003	1.89339e-06	2.56081e-05	1.64837e-30	0.545708	1.48679e-46	4.86748e-06	1.0143e-19	0.000826285	4.633	0.892	1.915	1.677	8.586	1.645	2.993	1.458	3.761	0.827	2.284	1.044	5	5-
389119	C3orf54	31	43	248	43	132	28	175	62	123	32	35	9	-12.342	-1.59971	19.4661	1.02402e-05	0.00011784	0.156585	5.3219e-26	3.52182e-11	6.66471e-11	4.67932e-15	0.00029627	1.423	2.125	10.269	2.26	6.239	1.787	9.542	3.921	7.085	1.741	2.882	0.766	5	5-
255738	PCSK9	151	61	1308	396	420	147	372	38	331	94	256	69	-11.0094	-1.86508	29.4276	5.80436e-08	1.06034e-06	1.12132e-08	1.36558e-70	5.52754e-17	9.53484e-62	1.99774e-36	1.5762e-25	1.573	0.691	12.107	4.725	4.576	2.128	4.74	0.556	4.384	1.151	4.833	1.337	5	5-
26253	CLEC4E	889	38	308	77	460	56	232	171	343	40	123	40	-11.2569	-2.3938	41.5533	1.14698e-10	3.56669e-09	7.26483e-200	1.95413e-22	2.18471e-57	0.0804447	4.43357e-66	2.25282e-10	16.989	0.788	5.25	1.685	9.16	1.487	5.384	4.571	8.308	0.9	4.249	1.421	5	5-
117581	TWIST2	86	12	107	12	133	15	112	38	89	41	19	2	-12.6847	-2.35715	38.5948	5.21587e-10	1.42739e-08	2.02057e-13	7.85916e-15	6.28829e-18	1.53362e-07	6.96033e-06	0.000595396	3.394	0.511	3.799	0.542	5.42	0.823	5.278	2.074	4.418	1.915	1.348	0.146	5	5-
130733	TMEM178	101	73	304	57	211	27	142	42	154	77	144	31	-11.9686	-1.75713	25.2222	5.10896e-07	7.74834e-06	0.121951	2.03235e-29	3.18402e-26	2.69264e-11	3.27817e-08	8.04508e-18	3.819	2.978	10.332	2.467	8.244	1.419	6.419	2.198	7.328	3.444	9.789	2.175	5	5-
55340	GIMAP5	105	23	214	24	234	24	87	60	121	8	22	2	-12.3573	-2.61768	45.3539	1.64461e-11	5.92116e-10	2.09736e-12	1.28138e-29	6.6113e-32	0.177815	2.4223e-28	0.000105073	22.114	5.283	39.878	5.792	51.792	7.022	22.61	17.872	32.532	1.975	8.422	0.784	5	5-
3202	HOXA5	126	108	748	143	425	79	528	142	239	79	315	46	-11.187	-1.85444	28.6373	8.72829e-08	1.54344e-06	0.621241	7.16246e-70	3.4407e-39	2.75329e-44	1.9183e-22	2.50436e-49	3.28	3.043	17.417	4.263	11.492	2.858	16.594	5.15	7.865	2.426	14.793	2.224	5	5-
84734	FAM167B	71	23	140	27	150	36	77	29	103	24	17	6	-12.6306	-1.82264	25.0669	5.5374e-07	8.34387e-06	4.75532e-06	9.91377e-14	2.08477e-11	0.000101902	4.66138e-14	0.0679422	3.676	1.28	6.555	1.6	7.976	2.592	4.713	2.062	6.678	1.475	1.576	0.576	5	5-
1043	CD52	1976	436	1870	366	1861	549	729	676	920	244	652	300	-9.91937	-1.54935	20.5067	5.94228e-06	7.19726e-05	5.8231e-212	2.726e-169	3.84219e-97	0.883732	7.95528e-106	2.17379e-29	285.094	65.939	254.02	60.326	265.024	110.362	115.677	127.311	160.737	42.726	164.154	79.614	5	5-
5596	MAPK4	190	202	596	49	369	103	229	25	367	162	318	26	-11.309	-2.1694	35.0897	3.14869e-09	7.45947e-08	0.316401	1.35058e-92	1.53671e-21	2.25302e-37	3.43703e-23	7.82496e-64	1.533	1.774	4.27	0.453	3.118	1.155	2.265	0.284	3.769	1.536	4.654	0.39	5	5-
185	AGTR1	120	109	491	56	210	16	376	35	181	66	174	21	-11.6604	-2.45565	44.4691	2.58405e-11	8.95038e-10	0.986207	1.04023e-65	7.93163e-33	8.62899e-65	2.29006e-15	3.11694e-30	2.47	2.433	9.02	1.32	4.501	0.458	9.387	1.007	4.72	1.601	6.472	0.803	5	5-
443	ASPA	37	29	82	23	62	12	42	7	55	10	62	7	-13.3362	-2.02831	28.3449	1.01513e-07	1.77268e-06	0.696498	4.72389e-06	2.7565e-06	6.87989e-06	1.98051e-09	1.94046e-11	1.385	2.417	2.568	0.919	2.238	0.77	2.735	1.175	2.417	0.412	6.043	0.453	5	5-
4609	MYC	8175	870	2240	1757	3558	821	2887	1154	2475	1038	1674	262	-9.195	-1.78161	26.1641	3.13592e-07	5.00554e-06	0	1	2.12392e-257	4.82958e-132	1.21986e-162	1.17789e-247	139.829	16.15	34.144	34.424	63.468	19.515	60.065	27.643	53.695	20.9	51.791	8.33	5	5-
58189	WFDC1	94	72	417	71	738	48	220	39	308	26	130	45	-11.6954	-2.37416	42.1112	8.62298e-11	2.75909e-09	0.264879	2.50989e-43	1.30379e-120	4.33012e-27	5.82334e-68	4.01929e-10	3.016	2.497	11.998	2.608	24.529	2.141	8.479	1.737	12.464	0.985	7.511	2.68	5	5-
90527	DUOXA1	602	570	1374	151	1022	217	626	173	901	89	211	62	-10.6961	-2.03771	32.9538	9.43753e-09	2.03173e-07	1	3.5809e-186	1.92992e-81	2.66443e-50	2.15377e-185	2.29267e-19	13.182	13.528	26.802	3.786	23.322	6.601	16.694	5.307	25.003	2.292	8.347	2.519	5	5-
162466	PHOSPHO1	173	7	142	12	155	25	115	35	139	31	18	6	-12.6407	-2.64466	47.6838	5.00802e-12	1.9722e-10	6.15694e-40	8.38924e-23	1.79171e-16	1.12529e-08	6.41299e-19	0.0458402	3.808	0.168	2.789	0.664	3.562	0.765	3.392	1.083	4.76	0.806	0.72	0.247	5	5-
10235	RASGRP2	873	165	810	195	1116	271	737	602	649	94	160	50	-10.7432	-1.84565	27.9527	1.24317e-07	2.13887e-06	5.41937e-107	7.67188e-60	6.87597e-77	0.125277	6.08192e-113	6.86289e-14	16.944	3.473	14.023	4.335	22.566	7.31	17.366	16.341	15.963	2.149	5.613	1.803	5	5-
1948	EFNB2	1578	1473	4412	1526	3529	528	3723	1060	3282	1658	2257	893	-9.23256	-1.37894	16.9732	3.79104e-05	0.00038312	1	9.80861e-187	0	4.52075e-286	9.77174e-154	7.51538e-131	13.759	13.971	34.161	15.243	32.21	6.396	39.763	13.006	36.41	16.984	35.681	14.483	5	5-
33	ACADL	549	467	823	109	539	11	530	118	882	41	498	175	-10.9311	-2.65703	49.0259	2.52607e-12	1.0647e-10	0.17217	1.58184e-100	4.31661e-113	1.00895e-53	1.85206e-222	2.41737e-35	8.628	7.969	11.52	1.962	8.84	0.24	10.144	2.599	17.591	0.758	14.162	5.113	5	5-
8843	HCAR3	507	132	137	53	237	51	62	24	252	35	60	19	-12.0371	-1.86517	27.7856	1.3553e-07	2.3134e-06	1.61139e-47	1.83054e-05	1.51381e-19	0.000882352	7.2051e-46	1.34751e-05	10.46	2.951	2.512	1.251	5.104	1.46	1.544	0.685	6.551	0.848	2.227	0.727	5	5-
11248	NXPH3	191	50	622	83	581	68	445	51	642	160	167	31	-11.359	-2.54297	52.9116	3.48909e-13	1.68747e-11	1.54963e-18	2.22621e-76	4.0884e-74	2.23356e-70	3.77137e-78	7.05615e-23	1.303	0.371	3.765	0.649	4.152	0.644	3.724	0.49	5.576	1.282	2.067	0.393	5	5-
64386	MMP25	829	56	411	76	448	97	386	137	544	60	71	19	-11.3452	-2.46784	46.9141	7.41689e-12	2.8203e-10	4.33738e-166	2.97907e-40	1.48148e-35	2.51659e-22	1.83886e-107	1.17507e-07	9.071	0.666	3.997	0.953	5.126	1.475	5.164	2.107	7.567	0.772	1.408	0.387	5	5-
57101	ANO2	202	32	223	48	330	43	237	43	119	24	108	10	-12.1376	-2.60152	52.6996	3.8867e-13	1.84435e-11	1.05974e-28	1.72702e-19	6.39245e-40	9.75541e-29	7.4972e-18	4.42207e-21	2.102	0.362	2.062	0.572	3.591	0.622	3.016	0.629	1.574	0.293	2.036	0.193	5	5-
4210	MEFV	227	8	154	22	360	52	146	42	117	29	60	13	-11.7965	-2.61656	50.2792	1.33359e-12	5.88068e-11	8.94796e-54	1.40119e-18	1.16416e-40	5.23232e-12	4.60895e-15	8.76955e-08	3.747	0.143	2.283	0.416	6.152	1.194	2.893	0.963	2.438	0.566	1.786	0.399	5	5-
151306	GPBAR1	41	4	89	6	96	31	85	18	86	21	29	5	-12.6749	-2.46503	40.7768	1.7065e-10	5.10249e-09	2.25684e-08	4.43398e-16	2.87188e-05	1.96061e-09	9.99492e-12	0.000112674	1.58	0.167	3.103	0.777	3.814	1.663	4.925	0.965	4.196	0.964	2.022	0.36	5	5-
114905	C1QTNF7	321	297	1058	231	714	109	534	55	456	392	711	121	-10.3942	-1.81107	26.3027	2.91886e-07	4.69838e-06	1	1.15941e-86	2.72856e-76	1.63969e-88	0.000820275	5.07627e-100	3.612	4.166	17.773	3.865	6.853	2.092	5.909	1.749	12.724	5.321	14.72	4.421	5	5-
1844	DUSP2	1488	104	138	101	814	174	720	242	367	109	298	51	-10.4761	-2.01321	32.0335	1.51535e-08	3.1153e-07	4.57616e-294	0.772982	5.60041e-65	6.17351e-45	1.13758e-38	1.56568e-42	37.356	2.827	3.098	2.904	21.236	6.071	21.841	8.469	11.651	3.227	13.501	2.378	5	5-
55022	PID1	541	509	1917	238	785	230	767	203	762	270	907	177	-10.0148	-1.74322	25.7293	3.9281e-07	6.112e-06	1	4.93479e-243	5.32392e-42	6.39516e-65	4.94129e-64	2.8043e-116	8.839	9.032	27.934	4.455	13.375	5.223	15.248	4.652	15.813	5.198	26.84	5.382	5	5-
158376	LOC158376	67	11	178	11	406	36	131	16	203	20	83	11	-11.8439	-3.20212	72.0346	2.11454e-17	2.24162e-15	8.92402e-10	3.46437e-31	1.78683e-59	2.71533e-20	7.48484e-42	4.29139e-14	1.896	0.337	4.51	0.357	11.924	1.416	4.468	0.63	7.257	0.668	4.235	0.578	5	5-
23569	PADI4	462	12	131	17	241	32	93	9	229	16	57	1	-11.7411	-3.76614	89.2241	3.52521e-21	6.49072e-19	1.39297e-113	8.6571e-17	7.58897e-29	1.92338e-16	1.46921e-52	2.29397e-15	8.355	0.235	2.112	0.352	4.543	0.804	2.044	0.228	5.251	0.341	1.864	0.034	5	5-
5950	RBP4	340	41	263	39	475	111	223	169	279	101	146	40	-11.2015	-1.89472	28.9033	7.60813e-08	1.35679e-06	3.10777e-55	1.56381e-30	8.81365e-35	0.156406	2.18493e-23	1.22341e-14	18.342	2.376	12.843	2.408	26.293	8.328	14.197	12.504	18.832	6.471	14.097	3.999	5	5-
7704	ZBTB16	1231	510	662	55	1752	193	2115	328	2925	137	60	24	-9.70037	-2.70779	54.866	1.29032e-13	6.65449e-12	1.64654e-58	2.36182e-102	3.18984e-228	1.14886e-279	0	0.000299113	22.475	10.102	10.776	1.15	33.342	6.69	46.925	8.381	67.707	2.945	1.981	1.949	5	5-
84952	CGNL1	2924	2678	5495	1101	6001	1237	4203	1273	4366	1450	2574	854	-8.47122	-1.57621	22.0023	2.72326e-06	3.56812e-05	0.439331	0	0	2.64394e-298	0	9.89061e-194	15.127	15.086	25.207	6.526	32.55	8.891	26.714	9.286	28.777	8.806	24.169	8.22	5	5-
6910	TBX5	114	72	365	53	243	80	233	86	106	44	87	23	-11.5927	-1.56216	20.4256	6.19958e-06	7.48221e-05	0.0169032	1.48786e-42	3.11597e-11	4.06567e-13	3.3128e-08	2.52799e-09	7.272	4.921	21.165	3.869	15.837	7.098	17.402	7.482	8.536	3.341	9.905	2.717	5	5-
256691	MAMDC2	1631	1461	4537	756	2371	390	1963	249	2205	291	2498	259	-9.0784	-2.42052	46.3345	9.9691e-12	3.74332e-10	0.252315	0	1.5834e-237	6.33802e-292	0	0	17.563	17.105	43.421	9.326	26.702	5.835	25.848	3.769	30.188	3.683	48.743	5.187	5	5-
445347	TARP	83	24	48	16	67	14	48	43	44	0	60	13	-12.7787	-1.89693	24.5047	7.41285e-07	1.08203e-05	6.8763e-08	0.00400479	1.52452e-06	1	9.85743e-14	8.76955e-08	3.961	1.233	2.068	0.874	3.29	0.929	2.717	2.825	2.634	0	5.135	1.15	5	5-
2824	GPM6B	108	112	238	37	125	30	255	30	257	42	117	4	-11.6984	-2.40077	41.1296	1.42466e-10	4.32133e-09	0.652352	4.06091e-27	1.83518e-09	1.5469e-39	1.07446e-42	5.59743e-29	10.114	11.145	22.746	3.962	11.805	3.91	27.304	3.769	29.678	4.715	19.391	3.95	5	5-
1804	DPP6	74	34	509	19	423	5	253	9	252	22	177	7	-11.4233	-4.12702	103.287	2.89883e-24	8.81833e-22	0.000616491	1.78232e-99	3.59065e-93	1.67684e-57	1.26871e-54	1.19879e-42	0.684	0.342	4.178	0.201	4.091	0.375	2.862	0.117	2.962	0.239	2.965	0.12	5	5-
2690	GHR	209	112	502	120	333	63	317	84	187	123	288	31	-11.6851	-1.78811	26.7238	2.34712e-07	3.8459e-06	2.18347e-06	8.17241e-38	1.9318e-30	5.55505e-27	2.70484e-05	3.04311e-52	1.848	1.077	3.941	1.215	3.082	0.774	3.433	1.045	2.103	1.278	4.617	0.51	5	4-
6352	CCL5	3063	404	539	442	2283	504	1943	2284	1606	281	675	287	-9.88658	-1.45253	16.5487	4.74173e-05	0.000469033	0	0.701121	7.73807e-174	1.44933e-16	5.29848e-251	2.40052e-35	115.213	16.364	18.128	19.022	88.904	26.328	87.48	118.313	75.643	12.437	45.407	19.922	5	4-
8698	S1PR4	424	79	463	85	564	104	282	242	392	78	62	33	-11.5151	-1.78558	25.4687	4.49629e-07	6.87926e-06	1.29081e-52	1.84218e-45	9.55107e-52	0.827974	2.2802e-57	0.00885938	11.408	2.301	11.147	2.619	15.757	3.889	9.154	9.067	13.329	2.476	3.009	1.649	5	4-
57213	SPRYD7	103	74	276	70	158	42	152	39	147	62	301	103	-12.1243	-1.4822	18.8383	1.42283e-05	0.000157647	0.107689	9.72549e-20	1.97785e-10	4.22387e-14	1.40369e-10	2.79137e-22	10.17	5.562	16.783	11.76	16.236	7.908	20.385	8.161	17.931	8.868	27.235	8.428	5	4-
9398	CD101	431	130	476	124	587	206	273	234	518	126	166	93	-11.3345	-1.34478	15.5458	8.05287e-05	0.000749246	3.35219e-34	2.29961e-32	3.57219e-23	0.751699	7.27122e-65	2.12225e-05	4.742	1.555	4.655	1.563	6.753	3.149	3.672	3.618	7.245	1.629	3.309	1.903	5	4-
246	ALOX15	590	72	656	1016	1447	304	441	40	1096	37	172	145	-10.7532	-2.16569	30.1673	3.9634e-08	7.49475e-07	1.27355e-94	9.5176e-42	1.91333e-116	1.19061e-76	3.44443e-292	0.290966	8.731	1.157	8.643	17.224	22.356	6.252	7.954	0.83	20.591	0.644	4.607	3.989	5	4-
23194	FBXL7	802	506	1477	349	1053	295	997	405	765	771	438	93	-10.4743	-1.30653	15.1255	0.000100596	0.000914071	3.90324e-12	1.24238e-110	1.11319e-59	1.28679e-44	0.164349	9.82765e-53	6.735	4.623	11.013	3.358	9.258	3.442	10.259	4.787	8.175	7.606	6.67	1.453	5	4-
8807	IL18RAP	662	52	111	44	185	44	177	81	223	33	133	34	-11.9716	-2.09776	33.9378	5.6901e-09	1.28149e-07	1.63216e-126	0.000164194	7.38678e-14	6.39954e-07	8.43055e-39	2.64042e-14	9.957	0.849	1.486	0.758	2.904	0.92	3.244	1.708	4.257	0.584	3.62	0.951	5	4-
163732	CITED4	144	216	232	137	363	110	360	50	316	71	62	13	-11.9141	-1.47485	16.9037	3.93243e-05	0.000396263	2.45957e-05	0.012762	4.87661e-19	5.39641e-51	1.62793e-42	3.28669e-08	4.993	8.09	7.223	5.44	13.026	5.303	14.965	2.404	13.808	2.91	3.869	0.837	5	4-
650	BMP2	1362	199	1289	1015	1183	551	847	168	1168	361	2276	688	-10.236	-1.62718	22.2424	2.40312e-06	3.18243e-05	6.78015e-197	1	3.64092e-22	2.34345e-94	3.33187e-115	1.32442e-192	17.052	2.707	14.354	14.558	15.478	9.586	12.948	2.953	18.58	5.315	51.61	16.017	5	4-
1052	CEBPD	3124	3031	3553	469	6568	1493	2783	1311	9243	2334	834	312	-9.08666	-1.56289	20.945	4.72651e-06	5.83585e-05	0.316288	0	0	2.6249e-88	0	3.01032e-53	113.008	118.369	115.465	19.426	245.702	75.083	120.539	65.697	421.101	99.842	54.272	20.946	5	4-
84106	PRAM1	289	53	478	75	561	150	290	216	423	122	116	69	-11.5991	-1.62976	21.9564	2.78914e-06	3.64307e-05	6.23794e-37	2.07302e-52	1.60148e-34	0.0657916	1.12858e-45	0.00172482	5.308	1.056	7.825	1.578	10.741	3.828	6.473	5.55	9.847	2.638	3.851	2.355	5	4-
135	ADORA2A	485	159	511	164	387	125	459	401	499	94	153	80	-11.386	-1.35916	15.764	7.17536e-05	0.000676295	2.14959e-34	1.27689e-25	4.40013e-18	0.863879	6.781e-75	6.56248e-06	7.55	2.686	7.076	2.924	6.289	2.703	8.704	8.74	9.848	1.72	4.305	2.312	5	4-
84467	FBN3	342	220	1130	201	705	33	435	37	501	159	365	509	-11.1095	-2.00101	29.0749	6.96327e-08	1.25243e-06	2.22828e-05	2.11867e-111	1.80583e-127	3.08597e-78	1.10647e-48	1.83137e-06	1.417	0.993	4.149	0.954	3.064	0.19	2.216	0.216	2.645	0.773	2.745	3.924	5	4-
200010	SLC5A9	148	59	473	190	1094	79	258	43	770	15	339	47	-11.4299	-2.761	54.6091	1.4705e-13	7.49169e-12	1.1077e-08	1.30344e-15	3.24428e-172	2.18139e-33	9.19989e-221	1.54224e-54	1.872	0.815	5.312	2.755	14.523	1.389	4.024	0.772	12.477	0.223	7.823	1.111	5	4-
79611	ACSS3	248	209	742	228	336	125	484	303	613	249	568	68	-11.2583	-1.33702	15.2868	9.23596e-05	0.00084435	0.361757	1.93978e-39	2.85621e-12	1.34914e-06	5.59462e-43	1.0663e-96	3.237	2.964	8.615	3.409	4.581	2.267	7.709	5.551	10.163	3.822	13.424	1.65	5	4-
253827	MSRB3	1483	788	3310	870	2470	711	2073	707	1673	1894	1707	323	-9.79603	-1.36462	16.4861	4.90084e-05	0.000482498	2.32489e-39	1.52401e-216	1.44358e-133	1.60037e-124	0.463738	3.58527e-223	14.009	8.096	27.774	9.415	24.417	9.332	23.972	9.394	20.103	21.023	29.231	5.675	5	4-
10810	WASF3	566	512	1413	203	802	461	638	162	720	302	608	243	-10.7953	-1.3383	15.5201	8.1632e-05	0.000757496	0.677388	2.02606e-163	2.66945e-06	1.41642e-56	7.21823e-48	1.85442e-35	4.454	4.384	9.871	1.83	6.609	5.04	6.154	1.795	7.212	2.792	8.677	3.557	5	4-
6351	CCL4	583	51	136	100	673	86	303	210	195	46	176	63	-11.723	-1.78506	24.473	7.53578e-07	1.09692e-05	3.98532e-107	0.823682	4.74612e-81	0.00837409	8.29598e-26	7.63762e-13	53.474	5	11.465	10.492	62.584	10.971	32.099	26.104	22.304	5.058	28.875	10.745	5	4-
8614	STC2	716	80	188	192	810	260	677	133	735	424	462	140	-10.9755	-1.56305	19.9833	7.81234e-06	9.18661e-05	2.26815e-119	0.0230743	2.02267e-37	5.19152e-76	3.16227e-26	1.44415e-39	5.069	0.616	1.181	1.557	6.007	2.557	5.879	1.326	6.624	3.525	5.933	1.844	5	4-
4091	SMAD6	39	50	472	71	958	34	165	45	732	48	13	1	-11.5814	-2.69329	44.1697	3.01108e-11	1.02769e-09	0.24284	1.36771e-53	4.78606e-184	8.11132e-14	1.43424e-171	0.0044121	1.75	2.43	18.979	3.65	59.853	2.124	12.377	3.44	41.433	2.549	3.897	4.104	5	4-
221476	PI16	314	26	458	42	284	12	292	8	138	211	47	13	-11.9352	-3.01146	55.8972	7.63598e-14	4.15231e-12	6.15876e-60	1.18229e-68	2.08882e-52	1.20888e-67	0.00415233	3.7302e-05	6.693	0.601	8.715	1.025	6.302	0.355	7.544	0.238	3.725	5.3	1.81	0.515	5	4-
30009	TBX21	260	31	142	53	395	42	235	152	276	43	170	48	-11.8904	-2.09958	34.0953	5.24766e-09	1.18951e-07	6.3311e-43	4.23957e-06	9.37444e-53	0.00393052	1.04132e-46	2.02432e-16	4.044	0.524	1.967	0.944	6.412	0.908	4.452	3.314	5.448	0.787	4.785	1.388	5	4-
4133	MAP2	530	481	1341	497	915	429	535	109	812	323	912	257	-10.5381	-1.31182	15.2486	9.42456e-05	0.00085972	0.735782	3.50558e-50	7.17711e-17	3.24359e-58	1.54556e-58	9.33013e-84	4.163	4.115	9.374	4.474	7.52	4.684	5.146	1.207	8.136	2.988	13.024	3.765	5	4-
5600	MAPK11	555	147	1014	336	803	220	502	418	288	177	139	40	-10.7362	-1.31602	15.1431	9.96618e-05	0.000905977	1.07792e-50	2.44035e-47	1.62881e-47	0.359019	3.14715e-09	2.67304e-13	9.312	2.677	15.159	6.457	14.053	5.129	10.248	9.823	6.13	3.496	4.219	1.247	5	4-
4501	MT1X	1433	279	377	158	972	143	138	68	516	110	143	110	-10.7785	-1.64254	22.2796	2.35691e-06	3.12518e-05	1.90307e-170	2.26298e-11	1.29004e-106	7.70962e-05	2.92768e-71	0.0843993	265.029	53.517	66.855	33.36	174.476	36.886	27.241	16.072	113.937	24.939	45.648	37.307	5	4-
401093	LOC401093	240	256	310	62	250	79	148	38	173	117	162	38	-11.6432	-1.37035	15.7541	7.21318e-05	0.000679554	0.25376	3.81577e-28	1.88639e-12	1.10056e-13	0.000109208	1.25269e-18	3.894	5.333	7.574	0.453	7.372	3.723	7.527	2.287	13.057	5.056	5.113	0.451	5	4-
29931	NCRNA00312	142	105	341	53	183	21	112	19	85	47	160	23	-12.0153	-2.02389	31.6794	1.81838e-08	3.64544e-07	0.0865868	3.27325e-38	4.19078e-24	1.54573e-14	0.000251718	1.47417e-25	2.78	2.229	5.956	1.188	3.732	0.571	2.662	0.52	2.109	1.084	5.662	0.837	5	4-
8706	B3GALNT1	265	251	786	252	603	122	512	162	820	375	824	179	-10.6315	-1.46993	18.9311	1.35523e-05	0.000150565	1	3.70469e-39	7.06661e-51	4.88029e-35	2.52554e-47	3.32065e-97	3.484	3.57	9.2	6.345	9.278	3.009	14.176	3.867	22.454	7.251	20.135	4.354	5	4-
3489	IGFBP6	490	161	1547	79	924	85	269	70	327	203	171	206	-10.7596	-1.89895	27.1079	1.92408e-07	3.21037e-06	1.11891e-34	3.55475e-280	2.77329e-132	2.03007e-23	3.32878e-10	0.106814	24.975	8.823	71.284	4.609	48.387	6.025	16.22	4.901	20.877	12.279	15.613	19.462	5	4-
11027	LILRA2	385	46	303	99	316	77	248	100	432	117	48	28	-11.6151	-1.74266	24.9417	5.90902e-07	8.82151e-06	6.18631e-63	2.34503e-15	2.06893e-22	7.22867e-12	7.0278e-49	0.0570143	10.1	1.319	7.07	2.978	8.696	2.809	8.021	4.984	14.543	3.618	2.302	1.375	5	4-
3659	IRF1	8128	1482	2306	1908	12793	1180	2545	3010	4083	1260	2942	1337	-8.64255	-1.43059	16.171	5.78727e-05	0.000558752	0	0.170168	0	1.75057e-22	0	8.82451e-132	88.986	17.637	22.418	23.927	146.539	17.947	34.142	46.371	56.829	16.199	58.344	27.2	5	4-
6347	CCL2	8963	725	678	566	2842	793	927	450	1243	483	3777	940	-9.29466	-1.62282	21.6787	3.22359e-06	4.15877e-05	0	0.435548	8.71607e-161	8.02575e-28	5.73125e-92	0	663.392	57.33	45.817	47.928	213.952	81.658	79.677	45.17	114.265	42.658	497.51	128.71	5	4-
1051	CEBPB	1594	536	970	242	1866	399	1213	1008	1963	539	342	238	-9.91251	-1.38089	16.5591	4.71562e-05	0.000467332	1.67656e-106	9.68176e-69	4.7725e-147	0.0937047	3.02084e-217	7.7801e-05	36.715	13.377	19.96	6.384	44.706	12.773	33.818	32.405	57.223	14.635	14.224	10.185	5	4-
11182	SLC2A6	442	55	470	117	574	95	178	234	206	41	72	48	-11.3732	-1.68372	21.4964	3.54487e-06	4.53147e-05	3.24037e-70	7.27789e-34	8.65819e-58	0.0004287	5.68601e-30	0.0690036	12.287	1.569	10.743	2.469	11.73	2.433	4.13	7.514	6.19	0.891	2.401	1.763	5	4-
167465	ZNF366	118	40	365	90	180	68	374	150	313	62	88	37	-11.6683	-1.60445	21.7806	3.05678e-06	3.95329e-05	1.18514e-08	8.82647e-27	1.09062e-06	8.93039e-18	8.12478e-46	1.8478e-05	1.702	0.627	4.687	1.487	2.711	1.363	6.577	3.035	5.733	1.052	2.298	0.992	5	4-
9046	DOK2	786	172	1305	261	1084	372	855	535	952	398	268	209	-10.3285	-1.35193	15.942	6.5314e-05	0.00062146	1.12827e-85	3.02004e-116	5.87368e-44	9.20758e-11	2.30967e-63	0.0221865	17.735	4.205	26.294	6.745	25.448	11.665	23.362	16.849	27.184	10.583	10.918	8.759	5	4-
10634	GAS2L1	665	273	937	234	893	175	679	308	1069	400	157	138	-10.5225	-1.36807	16.5122	4.83377e-05	0.000476789	9.15022e-33	5.43812e-66	1.47101e-77	3.02884e-24	2.09125e-83	0.527691	11.92	5.276	14.993	4.802	16.6	4.359	14.676	7.655	24.054	8.424	5.04	4.563	5	4-
55507	GPRC5D	181	70	62	47	121	13	49	8	48	5	63	32	-12.6603	-1.8112	23.5713	1.20367e-06	1.69224e-05	1.01821e-10	1	3.20613e-17	9.70989e-07	6.37145e-11	0.00462363	8.526	3.549	2.636	2.534	5.866	0.851	2.739	0.519	2.836	0.279	5.322	2.795	5	4-
22979	EFR3B	368	145	892	102	715	287	443	95	602	156	432	107	-10.8334	-1.95219	32.4552	1.21969e-08	2.5627e-07	5.00743e-20	5.44156e-119	1.02789e-20	1.49664e-46	3.45012e-71	1.35397e-45	1.834	0.787	3.941	0.582	3.736	1.987	2.713	0.668	3.823	0.913	3.908	0.992	5	4-
10865	ARID5A	3835	584	1202	518	3169	514	1192	1024	1744	606	595	219	-9.55681	-1.59028	21.4034	3.72114e-06	4.72229e-05	0	1.02929e-31	0	0.363998	4.00026e-149	1.86894e-39	70.844	11.704	19.799	10.961	61.016	13.195	26.754	26.47	40.843	13.183	19.873	7.519	5	4-
11326	VSIG4	1946	303	3028	325	2788	937	1689	733	1622	460	564	577	-9.57206	-1.71313	23.9637	9.81689e-07	1.39984e-05	2.36827e-270	0	9.67677e-116	2.54282e-65	2.86554e-174	0.849637	76.994	12.668	110.171	14.709	111.095	51.597	74.401	37.611	77.063	21.759	38.583	41.675	5	4-
6237	RRAS	1286	1168	3347	836	4742	848	2302	1164	4126	1123	1075	409	-9.16802	-1.44556	18.3928	1.79733e-05	0.00019537	0.529272	3.9235e-233	0	1.81018e-60	0	6.17682e-67	62.622	61.19	147.201	46.6	237.48	57.421	132.853	77.967	251.873	64.86	93.834	36.923	5	4-
1906	EDN1	422	320	1424	466	2448	277	201	179	2314	114	938	80	-10.0609	-2.13757	32.354	1.28495e-08	2.68889e-07	0.00716517	1.9648e-67	4.58626998925052e-314	1	0	1.48208e-183	8.382	6.94	25.096	10.612	51.053	7.649	4.923	5.042	58.835	2.662	33.965	2.967	5	4-
338557	O3FAR1	59	21	331	24	151	60	189	55	146	99	91	71	-12.2275	-1.45895	16.9277	3.88318e-05	0.000391677	0.000138653	9.77577e-55	3.14464e-05	5.24537e-15	0.00043649	0.228092	2.725	0.537	7.761	1.699	6.024	2.742	7.372	1.381	3.114	3.714	1.826	1.815	5	4-
3002	GZMB	795	69	167	85	733	74	234	174	545	36	210	62	-11.3294	-2.27531	37.1186	1.11161e-09	2.87702e-08	9.24761e-147	0.00137161	7.77488e-101	0.092133	1.53256e-127	3.52466e-19	42.919	4.001	8.156	5.251	40.61	5.555	14.912	12.875	36.79	2.307	20.278	6.199	5	4-
6769	STAC	165	63	1215	182	650	435	476	41	461	213	322	224	-10.5112	-1.57709	20.1552	7.14053e-06	8.47012e-05	6.23767e-10	6.28875e-137	0.0561787	1.17223e-84	2.20961e-26	0.000133119	2.209	0.917	14.476	2.792	9.092	8.094	7.777	0.77	7.841	3.355	7.807	5.577	5	4-
7225	TRPC6	822	607	1164	260	933	208	1064	329	814	236	945	887	-9.89095	-1.3565	16.0202	6.26715e-05	0.000598396	1.22593e-05	7.99183e-93	4.7719e-71	6.6838e-74	3.92463e-86	0.370018	6.823	5.482	8.579	2.473	8.109	2.399	10.823	3.844	8.599	2.301	14.225	13.696	5	4-
126014	OSCAR	325	43	437	62	679	225	374	228	405	103	147	138	-10.851	-1.63574	21.4427	3.64569e-06	4.6462e-05	2.31343e-50	6.1841e-52	1.43052e-29	6.98094e-06	4.34986e-49	0.971186	21.746	2.691	39.969	3.154	44.468	20.158	27.534	16.548	34.013	6.489	11.522	11.277	5	4-
4883	NPR3	780	638	3125	460	1283	354	2488	247	1453	1777	1194	389	-9.35107	-1.5511	19.6508	9.29628e-06	0.000108035	0.0166351	0	1.78148e-74	0	0.0036686	1.32653e-92	4.737	4.227	16.807	3.202	8.186	3.314	23.449	3.674	18.221	12.664	13.193	4.402	5	4-
653361	NCF1	2213	109	675	229	1011	250	525	715	538	179	190	168	-10.0862	-1.4256	15.4369	8.53044e-05	0.000788089	0	1.26046e-30	3.50957e-68	4.04219e-12	2.39493e-49	0.480084	97.798	5.225	26.24	11.563	46.962	15.29	28.744	44.476	30.184	9.204	15.164	13.708	5	4-
27123	DKK2	165	97	510	80	242	110	494	202	401	178	249	70	-10.9746	-1.43164	17.8586	2.3794e-05	0.000251478	0.00036887	5.6466e-56	1.0451e-05	1.94137e-22	4.05429e-25	8.15288e-24	1.755	1.122	4.822	0.975	2.693	1.626	6.427	3.02	5.424	2.226	4.8	1.385	5	4-
171568	POLR3H	1325	399	1604	557	1813	464	1140	510	1626	415	300	234	-9.66291	-1.41671	17.8072	2.44453e-05	0.000257743	4.17464e-103	2.85747e-68	6.0319e-116	1.44587e-41	1.54461e-192	0.0141933	16.375	4.561	14.698	6.65	19.999	6.711	14.891	7.619	21.846	6.479	5.729	4.557	5	4-
54674	LRRN3	135	72	678	139	263	35	210	28	479	34	308	45	-11.1172	-2.54661	49.916	1.6047e-12	7.04657e-11	0.000177607	1.86636e-59	3.78982e-31	3.39423e-31	1.07361e-109	3.12717e-48	1.529	0.89	6.817	1.805	3.127	0.551	3.645	2.034	6.948	0.453	6.363	0.952	5	4-
643733	LOC643733	56	37	135	24	90	11	66	30	54	4	56	15	-12.5516	-1.99121	28.3918	9.9083e-08	1.73457e-06	0.144085	4.32954e-14	1.41332e-11	0.00364948	2.14456e-13	3.50417e-06	12.411	9.999	25.449	6.907	45.24	10.941	17.518	9.333	22.688	6.102	44.207	13.978	5	4-
153	ADRB1	203	143	520	51	1268	24	330	17	1663	40	150	93	-10.4989	-3.29676	64.4379	9.96219e-16	7.68446e-14	0.0140615	9.25018e-75	1.5475e-267	3.06816e-69	0	0.00081826	2.824	2.161	6.439	0.813	18.425	0.464	5.6	0.332	29.382	0.655	3.778	2.406	5	4-
3101	HK3	2327	142	1474	192	2319	620	994	453	1184	362	357	351	-9.62624	-1.88969	27.9259	1.26052e-07	2.16694e-06	0	1.99778e-181	9.85057e-140	7.64952e-35	5.83897e-118	1	29.861	1.98	16.826	2.822	31.094	11.055	15.571	8.161	19.302	5.463	8.296	8.375	5	4-
3764	KCNJ8	530	421	1562	372	1278	337	1008	516	821	335	673	108	-9.9276	-1.49207	19.4572	1.02877e-05	0.000118129	0.0173119	1.60661e-115	4.14534e-79	5.43501e-26	8.98915e-57	3.5395e-98	9.057	7.808	23.786	7.281	22.776	8.003	20.952	12.348	17.795	6.739	20.802	3.43	5	4-
7483	WNT9A	135	30	164	32	123	51	73	8	146	46	26	7	-12.1753	-2.01922	30.6108	3.15334e-08	6.09472e-07	3.85751e-15	7.57161e-16	0.000347208	2.32548e-12	6.52125e-15	0.00323177	5.03	1.206	5.492	1.365	4.737	2.642	3.254	0.413	6.848	2.027	1.742	0.484	5	4-
2022	ENG	7884	2577	14376	3067	22426	3596	9914	4779	10191	2883	2697	2598	-7.53639	-1.54471	20.6278	5.57811e-06	6.78358e-05	0	0	0	9.50202e-295	0	0.439009	107.335	38.185	174.166	47.848	319.259	68.068	164.892	91.538	176.675	46.229	66.657	65.921	5	4-
2268	FGR	9698	819	2198	496	4533	790	1547	1337	2380	356	905	458	-8.76281	-1.99855	31.3253	2.1822e-08	4.31303e-07	0	1.74928e-172	0	0.354342	0	1.23348e-32	171.582	15.724	34.664	10.052	83.619	19.424	33.276	33.116	53.398	7.416	28.957	15.061	5	4-
4772	NFATC1	368	56	108	41	106	28	144	95	193	41	33	11	-12.4415	-1.70653	22.5346	2.06397e-06	2.77e-05	3.42016e-52	0.000116548	2.08508e-07	0.035073	4.90037e-27	0.00309624	22.681	4.617	5.928	3.61	7.736	2.568	10.222	7.85	16.681	3.358	8.403	6.045	5	3-
11012	KLK11	401	319	599	216	1085	621	308	28	926	1155	441	42	-10.8719	-1.39298	15.1784	9.78185e-05	0.000890763	0.0404935	2.37446e-24	2.2869e-08	8.18319e-54	0.00647859	1.0264e-83	18.204	16.119	24.16	11.272	52.362	39.257	17.823	2.047	55.844	62.213	37.74	3.646	5	3-
207107	SFTA1P	78	116	762	56	630	371	206	70	167	9	359	309	-11.5449	-1.44723	14.9537	0.000110181	0.000990877	0.00280498	1.61371e-123	0.000152683	3.1512e-13	5.19826e-42	0.126094	6.695	10.603	60.022	5.498	54.72	44.314	20.342	8.095	17.727	0.924	54.656	49.018	5	3-
5143	PDE4C	224	80	551	58	344	375	321	69	226	83	153	78	-11.7461	-1.511	18.2671	1.91993e-05	0.000207194	8.12534e-15	4.80562e-77	5.59801e-06	7.72075e-34	7.93129e-19	3.07841e-06	1.756	0.683	3.835	0.521	2.825	4.085	3.085	0.762	2.394	0.764	2.176	1.138	5	3-
919	CD247	684	134	351	210	806	142	509	438	473	70	243	113	-11.2583	-1.56653	19.8419	8.41204e-06	9.85866e-05	2.40711e-81	0.00296395	4.53093e-77	0.660584	6.84525e-82	4.71056e-11	25.06	4.664	9.946	11.162	38.909	8.624	32.785	23.263	33.918	3.885	11.528	6.093	5	3-
56999	ADAMTS9	5600	342	1392	455	958	666	1969	1077	1025	662	1305	261	-9.51631	-1.55205	19.4298	1.04365e-05	0.000119575	0	4.40188e-66	0.1064	9.75825e-41	4.07401e-26	1.60935e-163	28.561	1.899	6.295	2.659	5.123	4.719	12.338	7.746	6.661	3.963	12.08	2.477	5	3-
9023	CH25H	1965	152	247	68	706	327	339	148	345	304	555	182	-10.6273	-1.51272	18.9304	1.35573e-05	0.000150565	0	3.69031e-16	9.22016e-14	1.31614e-13	0.0121475	3.88552e-43	64.069	5.356	7.224	2.539	23.842	14.821	13.273	6.698	14.186	11.711	32.586	11.016	5	3-
969	CD69	499	71	339	148	304	178	129	89	144	20	240	65	-11.478	-1.59452	20.175	7.0671e-06	8.40445e-05	1.06699e-73	2.16326e-09	0.00969356	0.109301	2.10728e-26	7.21265e-24	91.29	13.491	59.701	30.919	53.917	45.429	25.001	20.742	31.585	4.505	76.137	21.915	5	3-
1441	CSF3R	3579	3233	3888	884	3375	825	2919	1475	3159	362	1060	659	-9.25208	-1.44667	17.6389	2.67073e-05	0.000279037	0.141168	5.41543e-302	8.54408e-228	1.32092e-76	0	9.23181e-21	63.092	50.679	73.465	14.444	55.704	16.338	51.718	30.119	59.331	6.624	27.728	18.828	5	3-
57580	PREX1	8450	1191	4413	1772	7256	1837	4789	4394	7444	1574	1260	781	-8.19323	-1.48691	18.4498	1.74443e-05	0.00019031	0	1.41472e-135	0	0.722735	0	7.01657e-25	47.853	7.344	22.164	11.498	43.074	14.453	33.306	35.078	53.7	10.465	12.949	8.229	5	3-
6252	RTN1	365	64	419	109	357	152	180	124	373	109	228	145	-11.0384	-1.39361	16.4598	4.96938e-05	0.000488101	1.26426e-47	1.25504e-28	1.89579e-09	0.0449998	7.28249e-40	9.47269e-05	12.154	2.302	12.519	4.156	12.309	7.036	7.193	5.729	15.659	4.289	13.669	8.962	5	3-
5990	RFX2	2809	718	926	510	678	351	617	199	1748	261	305	263	-9.76435	-1.33766	15.1008	0.000101918	0.000924487	4.62301e-261	1.1811e-10	5.90435e-09	1.00409e-40	1.385e-298	0.179048	27.538	7.684	8.054	5.731	6.978	4.783	7.459	2.766	21.934	3.008	5.45	4.813	5	3-
11025	LILRB3	1817	157	382	149	743	179	344	372	362	89	166	95	-10.4235	-1.55301	19.0741	1.25737e-05	0.000141084	0	1.34392e-13	7.98618e-52	0.0360007	3.56046e-45	4.01e-05	74.514	6.065	23.535	13.386	31.159	11.576	20.925	33.07	10.39	7.088	17.515	12.573	5	2-
256435	ST6GALNAC3	49	13	77	12	39	13	39	12	51	10	20	8	-13.6177	-1.90154	24.5412	7.27386e-07	1.06396e-05	3.58722e-05	2.97374e-09	0.020353	0.00166442	2.8747e-08	0.0696573	3.436	0.975	4.922	1.497	5.548	1.268	3.186	1.18	4.448	0.836	3.1	1.038	4	6-
3048	HBG2	20	1	13	3	24	1	1	0	22	5	45	8	-14.5885	-2.88786	33.4127	7.45338e-09	1.63476e-07	4.29437e-05	0.116135	8.47915e-05	1	0.00179136	8.38309e-07	3.74	0.196	2.226	0.638	4.505	0.258	0.211	0	4.965	1.105	14.586	2.711	4	5-
7439	BEST1	223	42	161	44	226	60	95	67	129	64	43	27	-12.3813	-1.36399	15.2546	9.39455e-05	0.000857728	1.78928e-28	4.359e-11	1.42602e-14	0.23275	2.12951e-07	0.131336	8.205	1.323	5.685	1.338	7.957	2.722	3.25	1.974	4.409	1.697	5.541	2.408	4	5-
79742	CXorf36	49	16	105	22	30	7	172	46	26	14	33	14	-13.175	-1.63987	19.6499	9.3006e-06	0.000108035	0.00029445	1.1759e-09	0.0076719	8.93061e-15	0.0459251	0.0174009	15.337	3.907	31.001	7.975	13.957	5.851	41.895	10.395	11.441	6.444	16.859	3.081	4	5-
6368	CCL23	32	4	49	5	51	10	23	2	13	6	9	7	-13.5594	-2.20396	26.4582	2.69302e-07	4.36498e-06	4.20271e-06	1.64602e-07	1.2928e-05	6.18062e-05	0.174654	1	14.648	3.259	17.024	3.895	20.238	7.799	12.887	3.05	7.089	0.842	7.193	5.267	4	5-
11024	LILRA1	92	5	91	5	145	23	186	50	186	13	23	4	-12.7424	-3.09821	61.312	4.87097e-15	3.31953e-13	8.74265e-20	2.35646e-17	4.58262e-16	4.78328e-16	2.77715e-43	0.000821592	2.025	0.119	1.789	0.126	3.322	0.704	4.96	1.537	5.184	0.337	0.915	0.164	4	4-
2015	EMR1	133	36	168	20	451	93	278	48	443	45	139	46	-11.9058	-2.39161	45.2414	1.7418e-11	6.22835e-10	1.58101e-12	1.62588e-22	5.01577e-38	1.68978e-34	6.10073e-90	2.21621e-11	1.665	0.49	1.871	0.287	5.901	1.618	4.25	0.844	7.047	0.663	3.152	1.071	4	4-
627	BDNF	67	15	259	12	184	5	103	17	80	7	219	22	-12.5577	-3.43842	77.9674	1.04758e-18	1.29345e-16	5.35202e-08	3.88391e-49	5.58386e-38	1.7001e-13	8.03045e-18	5.76369e-41	0.707	0.436	3.498	0.732	2.034	0.099	1.418	0.252	3.428	0.087	4.181	0.431	4	4-
730005	SEC14L6	29	30	85	19	47	21	66	21	54	7	56	12	-13.3528	-1.59437	18.2292	1.95858e-05	0.000210932	0.880579	1.30798e-07	0.0839602	5.98346e-05	5.11817e-11	2.29024e-07	1.059	1.182	2.786	0.794	1.775	1.066	2.886	1.061	2.48	0.302	3.674	0.812	4	4-
202559	KHDRBS2	56	18	110	11	173	23	151	28	110	13	135	16	-12.7172	-2.69125	52.7602	3.76853e-13	1.80185e-11	6.80812e-05	4.33354e-16	4.74005e-21	5.25157e-18	2.2462e-21	8.93016e-24	0.978	0.341	1.712	0.22	3.15	0.558	3.206	0.685	2.436	0.267	4.263	0.519	4	4-
255809	C19orf38	99	14	64	23	126	31	65	36	110	18	26	22	-13.0033	-1.6241	19.4841	1.0144e-05	0.000116862	2.20777e-15	0.00188265	2.4244e-09	0.0354796	4.83909e-19	0.906639	4.372	0.666	2.547	1.163	5.734	1.903	3.414	2.192	6.099	0.942	2.061	1.802	4	4-
126668	TDRD10	97	119	276	27	274	40	164	62	122	46	79	53	-12.3368	-1.48285	17.1635	3.42963e-05	0.00034861	0.0881065	4.05053e-40	1.51691e-30	3.13038e-09	2.41062e-10	0.0579896	5.803	7.727	13.074	2.514	21.219	7.594	14.532	4.602	12.266	4.903	12.715	10.881	4	4-
55698	RADIL	173	43	612	26	522	34	198	22	503	56	76	11	-11.8645	-3.24438	76.0879	2.71313e-18	3.18148e-16	1.43492e-17	6.43015e-116	8.14685e-86	7.26141e-32	9.09255e-99	2.08777e-12	1.828	0.494	5.747	0.315	5.769	0.499	2.559	0.327	6.758	0.695	1.455	0.216	4	4-
221687	RNF182	46	17	184	23	168	9	151	24	102	8	118	7	-12.8412	-3.0862	64.6148	9.10695e-16	7.07981e-14	0.00164457	2.10312e-24	1.11366e-29	1.31386e-20	3.6834e-23	3.1536e-26	0.584	0.579	2.077	0.334	2.228	0.159	2.34	0.428	1.645	0.119	2.712	0.165	4	4-
163175	LGI4	99	36	310	65	264	49	124	39	134	24	32	3	-12.5222	-2.14478	35.4373	2.63396e-09	6.33297e-08	8.87412e-07	4.60122e-27	6.426e-25	4.49847e-09	2.50284e-21	1.45181e-06	1.354	0.535	3.774	1.019	3.772	0.931	2.069	0.749	2.328	0.386	0.793	0.076	4	4-
2840	GPR17	74	28	185	11	445	24	126	21	137	12	39	5	-12.5853	-3.08171	63.7185	1.43527e-15	1.05337e-13	3.19899e-05	9.62098e-33	2.94586e-77	1.09972e-16	1.50487e-30	5.05907e-07	1.373	0.563	3.07	0.234	8.6	0.617	2.859	0.549	3.234	0.262	1.311	0.172	4	4-
27255	CNTN6	123	40	398	32	535	6	143	19	274	21	536	80	-11.8953	-3.35066	78.005	1.02779e-18	1.28413e-16	1.72038e-09	1.0782e-62	1.68372e-118	1.98397e-21	9.57852e-62	1.03611e-81	1.36	0.481	3.912	0.405	6.187	0.092	1.933	0.295	3.852	0.273	10.741	1.645	4	4-
5593	PRKG2	94	34	274	67	163	9	165	28	105	21	304	35	-12.4253	-2.53051	48.6562	3.05002e-12	1.25529e-10	6.72447e-07	8.9555e-21	2.22429e-28	4.6088e-21	3.44521e-16	1.52147e-53	1.108	0.436	2.873	0.905	2.009	0.147	2.377	0.464	1.573	0.291	6.493	0.767	4	4-
2051	EPHB6	440	122	644	150	793	183	349	283	393	89	70	51	-11.4152	-1.4745	18.1558	2.03544e-05	0.000218313	3.07963e-38	8.52798e-50	5.17858e-58	0.293607	3.90236e-52	0.178589	4.203	1.267	5.464	1.641	7.926	2.429	4.08	3.802	4.775	0.999	1.212	0.906	4	4-
83878	USHBP1	111	44	451	39	628	45	328	84	314	51	36	9	-11.9261	-2.52669	47.956	4.35885e-12	1.7394e-10	1.40449e-06	8.17977e-69	1.42109e-99	4.77161e-29	3.3785e-52	0.000187707	1.871	0.805	6.774	0.753	11.041	1.054	6.727	1.983	6.714	1.012	1.098	0.282	4	4-
5055	SERPINB2	98	17	32	14	194	19	30	15	136	47	72	6	-12.9333	-2.14949	32.3851	1.2645e-08	2.65418e-07	1.38528e-13	0.10987	1.4643e-27	0.13455	1.05005e-12	1.01618e-14	3.939	0.614	0.649	0.364	11.354	0.6	2.083	2.388	4.31	1.258	4.498	0.253	4	4-
389432	SAMD5	183	146	751	87	271	244	364	104	290	45	294	26	-11.5162	-1.88946	26.4594	2.69132e-07	4.36498e-06	0.217945	3.86838e-99	0.114759	1.2656e-28	6.67132e-49	1.7243e-57	1.089	0.946	3.965	0.593	1.691	2.018	2.66	0.873	2.199	0.314	3.176	0.288	4	4-
72	ACTG2	882	317	3054	588	1798	389	456	369	407	420	566	154	-10.2632	-1.33845	15.4372	8.52927e-05	0.000788089	7.70114e-54	3.95171e-280	5.35944e-140	0.217089	0.542307	1.81158e-54	49.325	15.638	117.041	33.713	91.83	34.403	39.116	28.82	34.265	24.579	54.359	12.555	4	4-
203190	LGI3	618	642	4258	63	1766	1306	1713	274	2956	48	714	37	-9.83706	-3.18918	54.4924	1.56051e-13	7.93102e-12	0.121734	0	0.523041	3.31186e-222	0	1.55098e-160	7.391	8.344	45.28	0.863	22.076	21.702	25.025	4.602	44.924	0.675	15.467	0.823	4	4-
284417	TMEM150B	89	2	194	32	115	44	70	64	81	31	34	15	-12.764	-1.71052	20.9644	4.67898e-06	5.78476e-05	2.5296e-23	5.51924e-21	0.000119302	1	3.7871e-07	0.0203981	5.328	0.128	10.54	2.192	7.046	3.664	4.922	5.237	6.054	2.207	3.637	1.663	4	4-
26153	KIF26A	159	49	608	61	399	101	426	96	339	81	47	4	-11.6411	-2.33676	43.1546	5.05798e-11	1.66146e-09	4.13612e-13	3.34396e-87	9.88442e-27	6.81719e-43	3.8924e-43	1.03128e-09	0.883	0.296	2.995	0.388	2.323	0.779	2.906	0.752	2.399	0.528	0.474	0.041	4	4-
114898	C1QTNF2	79	34	294	25	169	18	167	29	132	35	62	5	-12.4561	-2.58708	49.2062	2.30416e-12	9.81019e-11	0.000127932	1.63594e-45	1.80442e-23	4.95919e-21	2.61807e-16	7.19537e-13	1.331	0.622	4.414	0.482	2.97	0.421	3.423	0.684	2.821	0.694	1.89	0.157	4	4-
2494	NR5A2	291	57	716	150	150	118	544	182	72	61	203	53	-11.3164	-1.4247	16.7662	4.2279e-05	0.000422187	1.64551e-35	2.2767e-61	1	2.60127e-34	0.209534	4.91116e-21	2.321	0.496	5.066	1.372	1.256	1.309	5.339	2.053	0.734	0.572	2.949	0.789	4	4-
6915	TBXA2R	54	19	139	15	103	13	104	30	125	29	11	2	-12.7108	-2.27849	35.797	2.18988e-09	5.34484e-08	0.000274892	1.10132e-19	2.73169e-13	7.00293e-09	8.82276e-17	0.045516	1.373	0.554	3.196	0.881	2.771	0.774	3.129	1.048	3.982	1.168	1.141	0.144	4	4-
728643	LOC728643	25	12	18	0	81	1	13	0	52	2	37	2	-13.8178	-3.98792	64.1197	1.17087e-15	8.77735e-14	0.073282	3.19324e-05	8.55265e-18	0.000689149	1.52624e-13	1.14553e-08	3.354	1.692	2.262	0	10.775	0.187	1.934	0	8.475	0.325	8.682	0.494	4	4-
660	BMX	130	145	199	58	136	15	176	44	98	42	48	16	-12.3015	-1.53791	18.6634	1.55949e-05	0.00017138	0.237442	3.78426e-12	1.26115e-18	3.36002e-16	1.98372e-07	0.000219052	2.171	2.628	2.961	1.109	2.369	0.348	3.576	1.029	2.076	0.826	1.45	0.497	4	4-
5243	ABCB1	1436	162	1002	157	263	201	1014	226	138	65	768	158	-10.6822	-1.94435	30.3244	3.65503e-08	6.96813e-07	1.16234e-237	2.38168e-109	1	2.21155e-101	1.77034e-08	1.43213e-94	11.639	1.428	7.208	1.458	2.232	2.263	10.073	2.578	1.423	0.619	11.286	2.382	4	4-
651746	ANKRD33B	531	60	465	149	386	126	493	212	704	213	483	79	-11.0419	-1.93527	31.3421	2.16334e-08	4.27978e-07	6.66597e-88	1.26126e-23	1.00092e-17	5.04275e-20	2.04432e-71	9.39456e-70	2.111	0.26	1.638	0.679	1.61	0.696	2.41	1.189	3.567	0.994	3.486	0.584	4	4-
142684	RAB40A	63	25	96	15	89	12	42	14	45	28	46	20	-13.0054	-1.67545	20.9144	4.80263e-06	5.92084e-05	0.000303706	3.82061e-11	7.04789e-11	0.00182846	0.0443673	0.0044745	2.273	0.97	3.079	0.619	3.331	0.601	1.821	0.694	2.022	1.183	2.951	1.324	4	4-
400120	C13orf36	33	5	385	9	154	7	134	4	176	3	333	0	-12.0847	-5.18003	135.186	3.00619e-31	2.10333e-28	9.05919e-06	1.26507e-81	7.1947e-29	1.56726e-31	1.07971e-50	2.49909e-99	0.403	0.066	4.186	0.126	1.968	0.119	2.001	0.069	2.734	0.043	7.375	0	4	4-
88	ACTN2	178	32	409	87	469	17	156	29	228	4	147	6	-11.7357	-3.48311	80.8316	2.45793e-19	3.35013e-17	2.91952e-23	2.33386e-35	1.06213e-89	1.23391e-18	1.23205e-66	2.86128e-35	1.507	0.295	3.074	0.844	4.156	0.2	1.618	0.345	2.456	0.04	2.256	0.094	4	4-
405753	DUOXA2	69	75	102	14	100	17	59	18	66	8	15	1	-12.911	-2.05382	27.5812	1.50638e-07	2.56024e-06	0.541704	6.60088e-13	1.98636e-10	4.79191e-05	2.19868e-13	0.00133795	2.151	2.521	2.847	0.5	3.228	0.736	2.195	0.771	2.576	0.294	0.837	0.058	4	4-
8530	CST7	730	76	221	85	526	104	367	349	370	94	132	90	-11.1327	-1.54734	19.0102	1.30021e-05	0.000145167	1.43753e-125	1.74987e-08	2.05553e-45	0.740726	1.06267e-44	0.0130452	39.441	4.411	10.809	5.256	29.159	7.814	23.398	25.859	25.011	6.031	12.764	9.011	4	4-
794	CALB2	46	26	216	23	484	74	90	20	146	160	66	6	-11.973	-1.94836	27.788	1.3536e-07	2.3134e-06	0.0693585	1.18345e-30	8.12942e-52	1.15063e-09	1	3.72458e-13	2.072	0.962	6.399	0.883	18.517	3.441	5.937	3.309	6.402	6.321	6.101	0.87	4	4-
3201	HOXA4	34	30	148	40	139	22	70	15	69	36	31	11	-12.926	-1.5282	17.7839	2.4747e-05	0.000260371	1	3.53353e-10	3.17705e-15	3.58607e-08	0.000583855	0.00677738	0.842	0.804	3.276	1.134	3.577	0.757	2.095	0.518	2.161	1.051	1.385	0.506	4	4-
53637	S1PR5	96	22	86	21	309	9	213	36	331	20	79	11	-12.2781	-3.03943	63.6398	1.49379e-15	1.09249e-13	5.97254e-11	3.73644e-07	1.80798e-62	5.79599e-27	1.01006e-78	3.98659e-13	1.707	0.973	1.363	0.428	10.446	0.944	5.87	1.262	7.463	0.419	2.54	0.364	4	4-
94030	LRRC4B	59	29	296	41	209	35	210	57	169	8	34	10	-12.3417	-2.31101	38.9819	4.27752e-10	1.1845e-08	0.00653204	9.64138e-36	1.08303e-21	1.14749e-17	1.09903e-43	0.00101446	0.792	0.423	3.533	0.63	2.929	0.652	3.437	1.073	2.88	0.126	0.826	0.249	4	4-
79908	BTNL8	20	2	34	4	167	9	65	12	61	2	7	5	-13.4343	-3.05643	48.647	3.06442e-12	1.25875e-10	0.000236114	1.58697e-05	2.02802e-29	2.1523e-08	1.41244e-17	1	2.166	0.295	1.151	0.5	9.786	0.752	2.772	0.591	2.765	0.635	1.477	0.329	4	4-
55859	BEX1	19	18	25	11	111	3	54	1	43	2	28	1	-13.1555	-3.0272	45.9706	1.2004e-11	4.4754e-10	1	0.19244	2.25059e-22	3.47815e-14	5.01138e-11	4.05219e-07	1.163	1.181	1.389	0.77	6.947	0.255	3.877	0.084	3.283	0.146	3.06	0.113	4	4-
338596	ST8SIA6	36	13	81	17	44	12	77	10	126	3	74	4	-12.7026	-2.80079	49.1052	2.42594e-12	1.02662e-10	0.00662378	1.01312e-07	0.00305927	3.87204e-12	1.00374e-35	5.94445e-17	1.153	0.45	2.326	0.623	1.46	0.534	2.963	0.445	5.09	0.113	4.268	0.238	4	4-
28999	KLF15	166	157	884	97	969	235	493	141	512	44	85	92	-10.6476	-1.70545	21.987	2.74509e-06	3.59223e-05	1	1.10133e-120	4.43885e-67	3.19207e-38	7.9025e-111	0.831309	2.639	2.71	12.517	1.766	16.073	5.191	9.542	3.141	10.328	0.823	2.445	2.719	4	4-
257000	PLAC2	94	16	362	35	291	43	143	13	178	44	155	21	-11.6693	-2.7877	59.131	1.47515e-14	9.18797e-13	3.54766e-13	2.79932e-53	1.18062e-32	3.54335e-25	2.21736e-22	1.51977e-25	0.99	0.183	3.388	0.422	3.206	0.629	1.842	0.192	2.384	0.545	2.958	0.411	4	4-
9721	GPRIN2	35	42	116	13	171	39	72	30	108	16	29	9	-12.3878	-1.73752	21.6245	3.31591e-06	4.27262e-05	0.420712	2.14546e-16	2.16895e-13	0.000826421	8.71908e-20	0.00401182	0.813	1.058	2.409	0.346	4.134	1.26	2.025	0.973	3.176	0.438	1.217	0.389	4	4-
1271	CNTFR	141	21	147	19	161	10	142	7	60	22	20	0	-12.2898	-3.15841	63.6068	1.51904e-15	1.10711e-13	2.07469e-21	3.46442e-19	3.88037e-27	9.28689e-31	1.74035e-05	6.28892e-06	3.375	0.545	3.145	0.529	4.131	0.333	4.111	0.575	1.84	0.728	0.864	0	4	4-
256076	COL6A5	946	488	1012	305	661	489	822	666	581	22	677	145	-10.6286	-1.52129	17.9301	2.29162e-05	0.000243595	1.04729e-27	4.14328e-55	0.78366	0.0671524	2.2158e-152	9.86248e-81	4.087	2.292	4.668	1.51	2.988	2.935	4.332	4.03	3.184	0.112	7.536	1.679	4	3-
56901	NDUFA4L2	220	122	526	97	613	106	661	151	633	646	128	94	-11.1621	-1.35705	15.6064	7.79885e-05	0.000727546	3.59837e-06	4.03654e-51	1.06461e-59	6.35244e-65	0.285754	0.053169	7.912	4.737	16.99	3.994	22.8	5.299	28.468	7.523	28.669	27.468	8.28	6.273	4	3-
28954	REM1	61	30	306	43	211	29	162	73	160	23	42	8	-12.4096	-2.12492	34.066	5.3274e-09	1.20628e-07	0.00546877	5.27011e-37	9.04855e-25	1.86957e-06	1.92479e-28	3.89833e-06	1.567	0.835	7.032	1.265	5.633	1.036	5.027	2.614	5.198	0.697	1.947	0.382	4	3-
5251	PHEX	144	74	192	55	141	24	164	30	58	43	42	27	-12.6496	-1.43492	16.6743	4.43781e-05	0.000441468	4.63321e-05	3.25395e-12	8.33029e-15	6.49402e-20	0.0943844	0.16241	2.004	1.119	2.378	0.877	2.05	0.464	2.784	0.586	1.025	0.704	1.058	0.699	4	3-
51348	KLRF1	32	7	93	40	69	1	86	11	92	8	76	59	-13.242	-2.32154	34.6516	3.94324e-09	9.11549e-08	0.000138882	0.00202016	4.84018e-16	1.78515e-13	1.80649e-20	0.27748	1.19	0.281	3.108	1.703	2.652	0.052	3.826	0.566	4.307	0.352	5.082	4.071	4	3-
152	ADRA2C	63	20	88	110	116	27	86	6	79	20	14	1	-13.0097	-1.87878	23.022	1.6016e-06	2.1958e-05	1.57821e-05	0.00256799	2.91594e-09	8.37046e-17	4.95695e-10	0.00243069	1.347	0.464	1.68	2.694	2.581	0.802	2.228	0.179	2.139	0.504	0.541	0.04	4	3-
161176	C14orf49	264	41	307	103	178	105	288	140	238	114	64	14	-11.8855	-1.476	18.0289	2.17577e-05	0.000232533	2.73698e-37	1.07792e-14	0.0540322	3.324e-09	1.73453e-13	3.35831e-08	3.166	0.534	3.273	1.415	2.231	1.749	4.218	2.358	3.627	1.607	1.39	0.312	4	3-
2247	FGF2	375	144	562	94	215	87	245	77	281	163	508	44	-11.2429	-1.80603	27.0085	2.0256e-07	3.36637e-06	2.64841e-21	3.23992e-59	8.75813e-07	3.65597e-17	1.4445e-10	9.30728e-100	2.181	0.914	2.893	0.627	1.314	0.703	1.759	0.634	2.087	1.112	5.372	0.476	4	3-
3158	HMGCS2	26	14	90	119	46	0	41	13	128	29	63	1	-12.8329	-2.05364	25.2909	4.9302e-07	7.49347e-06	0.220954	0.000364157	3.44816e-11	0.00144569	1.95506e-17	4.23121e-17	1.307	0.307	2.487	4.061	1.205	0	2.921	0.339	3.37	0.635	3.233	0.172	4	3-
84658	EMR3	307	48	146	62	182	137	172	35	152	12	43	18	-11.9977	-1.83466	24.8616	6.15962e-07	9.13067e-06	2.6732e-43	8.48491e-05	1	1.96622e-19	1.2862e-34	0.00449724	5.429	0.921	2.301	1.256	3.356	3.367	3.698	0.866	3.409	0.25	1.375	0.592	4	3-
3824	KLRD1	67	16	75	25	180	14	90	33	110	14	88	8	-12.6307	-2.45321	42.8091	6.03492e-11	1.96392e-09	1.30629e-07	0.000186016	4.7663e-28	9.6373e-06	1.0866e-20	2.22965e-17	2.649	0.277	0.894	0.384	4.63	0.261	2.375	1.842	1.883	0.221	2.245	0.454	4	3-
623	BDKRB1	60	9	30	21	95	8	60	27	142	25	65	46	-12.8093	-1.7363	21.2619	4.00625e-06	5.0354e-05	3.43925e-09	0.97442	5.75067e-15	0.00612848	1.17281e-22	0.155575	2.091	0.339	0.939	0.838	3.425	0.388	2.506	1.304	6.235	1.03	4.076	2.975	4	3-
144423	GLT1D1	144	22	118	23	156	64	147	34	149	11	73	22	-12.0412	-2.23291	37.3843	9.69989e-10	2.5292e-08	1.44922e-21	7.81083e-12	3.52197e-05	6.21946e-15	1.0324e-34	5.26002e-07	2.119	0.352	1.546	0.388	2.396	1.309	2.636	0.702	2.783	0.19	1.944	0.602	4	3-
147	ADRA1B	110	52	134	61	177	14	109	23	181	50	21	3	-12.0707	-1.99608	29.4705	5.67752e-08	1.03989e-06	5.40838e-05	0.000531474	1.49718e-27	3.8738e-12	3.96261e-21	0.000735942	1.982	1.017	2.153	1.259	3.325	0.351	2.387	0.58	4.136	1.061	0.684	0.1	4	3-
80111	C3orf36	192	21	70	22	264	29	86	25	78	44	32	13	-12.1359	-1.96143	28.6449	8.69429e-08	1.53873e-06	1.02583e-32	0.000153317	3.49299e-35	3.25663e-07	0.0011106	0.0147069	4.906	0.581	1.6	0.644	7.008	1.03	2.654	0.89	2.52	1.326	1.475	0.617	4	3-
79148	MMP28	88	25	336	20	231	170	173	44	253	163	40	29	-11.5511	-1.46372	16.4414	5.01777e-05	0.000492394	1.72824e-08	6.28513e-59	0.974628	1.2429e-15	2.92506e-07	0.362669	17.754	6.841	42.333	6.121	40.667	43.064	36.654	7.375	40.959	32.004	30.776	19.489	4	3-
477	ATP1A2	252	122	665	311	791	243	238	61	381	87	105	56	-10.8046	-1.42865	17.7923	2.46378e-05	0.000259352	2.40434e-09	2.97929e-14	3.42275e-39	2.30032e-21	1.96131e-50	0.000383154	1.738	0.916	4.069	2.458	5.718	2.329	2.015	0.593	3.346	0.705	1.314	0.718	4	3-
64168	NECAB1	143	29	340	43	116	9	227	105	301	20	326	37	-11.4739	-2.79041	56.6212	5.28391e-14	2.96549e-12	3.12563e-17	1.62494e-43	2.14281e-18	3.11702e-08	2.20565e-70	9.61215e-58	1.123	0.248	2.362	0.387	0.957	0.098	2.199	1.166	3.017	0.184	4.653	0.541	4	3-
420	ART4	30	24	140	27	118	23	70	31	40	2	38	10	-12.5946	-1.84649	24.1599	8.86599e-07	1.27464e-05	0.863983	9.91377e-14	5.67358e-11	0.0017155	6.409e-10	0.00017648	0.971	0.84	4.065	1.001	3.957	1.035	2.722	1.393	1.633	0.076	2.215	0.601	4	3-
57452	GALNTL1	198	71	390	92	200	83	241	34	123	111	71	15	-11.8142	-1.61306	21.2791	3.97034e-06	4.99625e-05	4.06851e-13	8.57882e-30	4.41851e-06	3.84533e-34	0.222208	2.94984e-09	2.847	1.445	5.176	2.233	3.013	1.606	4.545	0.708	3.241	1.811	1.77	0.563	4	2-
343637	RSPO4	91	29	188	54	139	58	230	119	60	2	50	4	-12.5239	-1.96064	28.1345	1.13169e-07	1.96477e-06	8.86489e-08	7.93062e-12	0.000149425	1.42765e-06	2.75308e-17	1.70201e-10	3.414	1.735	4.388	1.052	2.465	2.204	6.721	4.337	1.741	0.04	1.54	0.442	4	1-
9802	DAZAP2	0	38	0	0	66	0	55	8	16	0	3	0	-13.6842	-2.33974	15.4126	8.64085e-05	0.000796537	1.00015e-11	1	2.26751e-16	4.39161e-08	3.46213e-05	0.391342	140.546	83.104	237.384	59.71	67.949	71.785	36.725	42.894	66.06	50.748	38.228	36.345	4	1-
10443	N4BP2L2	0	34	0	0	59	0	34	30	34	0	44	0	-13.4503	-2.12791	15.8576	6.8291e-05	0.00064627	1.53393e-10	1	1.22951e-14	1	9.00618e-11	5.79196e-13	29.836	28.969	31.962	29.338	37.511	29.553	30.207	29.38	28.223	37.48	59.224	57.533	4	0-
4118	MAL	25	12	70	13	51	4	44	22	45	2	22	13	-13.1336	-1.97218	24.7238	6.6162e-07	9.75239e-06	0.073282	1.39049e-07	3.06822e-08	0.0396895	1.39494e-11	0.287916	10.09	3.862	23.991	6.443	21.622	3.601	19.66	8.063	20.167	2.964	13.188	3.497	3	6-
10439	OLFM1	85	19	147	25	75	32	70	14	41	29	15	3	-12.891	-1.76103	22.1125	2.5713e-06	3.38167e-05	6.82532e-10	5.84823e-16	0.0115028	1.37755e-08	0.146927	0.0166144	23.08	7.055	25.564	11.984	21.194	16.701	19.064	8.024	13.669	6.421	12.852	4.505	3	5-
100190938	LOC100190938	21	10	53	23	67	7	58	8	51	2	22	8	-13.3869	-2.21231	30.3871	3.53867e-08	6.7709e-07	0.107426	0.0332084	4.2091e-10	8.94069e-09	2.91958e-13	0.0335208	0.924	0.429	2.444	1.045	2.726	0.572	2.759	0.445	2.584	0.692	3.405	0.596	3	5-
3957	LGALS2	407	47	57	50	46	9	119	101	57	6	31	14	-12.7012	-1.58597	17.117	3.5147e-05	0.000356739	7.44334e-67	0.723469	5.39404e-05	0.868769	1.61626e-12	0.0334675	54.367	6.6	7.135	7.632	6.093	1.675	17.625	17.712	9.256	0.97	7.248	3.443	3	4-
56137	PCDHA12	88	12	133	13	90	4	68	64	82	62	82	54	-12.9286	-1.7446	21.1806	4.1798e-06	5.22848e-05	6.77274e-14	3.24953e-20	1.6508e-17	1	0.0505861	0.0414481	2.919	0.211	3.782	0.242	2.521	0.184	1.344	1.454	2.853	1.183	2.406	2.498	3	4-
25927	CNRIP1	38	18	85	11	57	20	55	16	50	32	21	11	-12.884	-1.43228	15.0001	0.000107505	0.000970134	0.036011	1.70347e-11	0.00487869	6.11257e-05	0.026237	0.192298	17.829	8.561	27.694	9.23	24.055	11.578	21.613	14.441	12.321	11.116	23.755	7.428	3	4-
54959	ODAM	13	36	96	19	24	2	29	7	46	8	33	3	-13.6996	-1.92691	21.4525	3.62701e-06	4.6252e-05	0.000580425	9.80823e-10	0.000350554	0.00308755	3.55886e-08	8.05066e-07	0.456	1.363	3.021	0.762	0.87	0.097	1.218	0.34	2.031	0.331	2.081	0.195	3	3-
7490	WT1	44	2	35	11	99	16	99	40	84	80	78	1	-13.0769	-2.14981	30.1406	4.01829e-08	7.58488e-07	8.18735e-11	0.0114074	2.98833e-11	3.69092e-05	0.47619	1.83488e-21	0.898	0.045	0.632	0.258	2.139	0.454	2.535	1.178	2.225	1.921	2.937	0.038	3	3-
3004	GZMM	106	16	41	28	115	21	143	147	100	9	16	5	-12.8393	-1.70258	19.2387	1.15353e-05	0.000130737	6.24435e-16	0.803527	1.06849e-11	0.452058	8.82563e-22	0.053248	5.667	0.919	1.984	1.714	6.31	1.561	9.026	10.782	6.691	0.571	1.531	0.495	3	3-
7850	IL1R2	369	42	95	48	186	34	78	50	215	30	40	44	-12.3398	-1.61931	19.2549	1.14378e-05	0.000129843	1.57472e-61	0.019003	8.37054e-18	0.119256	9.63518e-39	0.905844	12.734	1.566	2.943	1.897	6.643	1.631	3.227	2.393	9.35	1.224	2.484	2.818	3	3-
57631	LRCH2	166	100	339	86	243	78	262	94	286	290	319	48	-11.8059	-1.36819	15.9349	6.55591e-05	0.00062351	0.00103567	4.65115e-24	5.10487e-12	4.28233e-15	0.514589	4.00452e-49	1.281	0.84	2.322	0.76	1.964	0.836	2.478	1.021	2.809	2.628	4.464	0.689	3	3-
11013	TMSB15A	10	13	39	5	129	4	30	5	26	21	13	8	-13.8376	-1.74599	17.4414	2.96296e-05	0.000305465	0.699524	6.1878e-06	4.18069e-26	0.000342099	0.429462	0.567197	0.918	1.268	3.292	0.525	11.954	0.511	3.154	0.616	2.944	2.309	2.112	1.356	3	3-
7432	VIP	9	3	45	6	24	4	63	6	17	11	48	13	-14.0339	-2.13302	26.1747	3.11885e-07	4.98968e-06	0.210269	4.32991e-06	0.00309106	3.71316e-11	0.201667	2.39922e-05	0.246	0.09	2.058	0.269	1.245	0.152	6.129	0.656	1.491	0.354	4.629	0.665	3	3-
10584	COLEC10	12	20	64	13	101	5	66	3	155	5	37	0	-13.3755	-3.25866	55.0281	1.18818e-13	6.18855e-12	0.232952	2.16499e-06	2.64372e-18	3.3495e-14	1.72273e-41	6.69541e-11	0.301	0.544	1.437	0.374	2.635	0.174	2.002	0.105	4.921	0.148	1.676	0	3	3-
8817	FGF18	92	83	164	27	122	40	75	17	98	71	72	9	-12.8262	-1.55671	18.7708	1.47408e-05	0.000162676	1	7.6034e-18	3.29289e-06	2.13805e-08	0.0127253	1.23257e-12	1.92	1.878	3.055	0.645	2.651	1.16	1.898	0.496	2.591	1.746	2.715	0.349	3	3-
201191	SAMD14	37	28	101	16	79	19	113	40	99	30	11	6	-13.0941	-1.53432	17.2041	3.35719e-05	0.000341901	0.602378	8.91882e-12	1.94196e-06	3.34543e-07	8.68518e-11	0.502891	0.823	0.675	2.006	0.408	1.828	0.587	3.043	1.242	2.787	0.786	0.442	0.248	3	3-
147111	NOTUM	52	34	377	12	124	16	62	35	191	37	9	0	-12.6	-2.36759	34.7909	3.67088e-09	8.57082e-08	0.156433	9.84317e-77	1.36022e-15	0.0517109	1.3201e-28	0.00900024	0.933	0.662	6.029	0.247	2.319	0.399	1.352	0.879	4.345	0.782	0.292	0	3	3-
8447	DOC2B	210	26	172	53	72	43	139	56	72	29	45	30	-12.6021	-1.38902	15.2839	9.25022e-05	0.000845285	9.26539e-34	4.11499e-10	0.329995	6.05235e-07	3.49825e-06	0.185063	4.325	0.581	3.162	1.25	1.544	1.231	3.472	1.612	1.879	0.704	1.675	1.148	3	3-
375704	ENHO	7	4	88	6	116	4	3	3	48	7	5	6	-13.7617	-2.41638	26.4609	2.68928e-07	4.36498e-06	0.708655	8.02132e-16	7.60641e-23	1	1.655e-09	1	0.308	0.189	3.485	0.302	5.253	0.244	0.157	0.182	2.649	0.364	0.394	0.489	3	3-
149620	RP11-165H20.1	3	16	198	4	26	3	367	118	147	7	62	1	-12.5968	-2.94968	44.4469	2.61355e-11	9.03764e-10	0.00455321	5.06437e-43	0.000401276	1.36715e-24	7.00073e-37	8.2403e-17	0.042	0.243	2.469	0.064	0.38	0.058	6.271	2.319	2.615	0.115	1.573	0.026	3	3-
27129	HSPB7	135	64	342	59	266	75	139	47	78	68	46	10	-12.2632	-1.50557	18.5605	1.64597e-05	0.000180224	6.76319e-06	2.15069e-35	1.5551e-15	2.14376e-09	0.270154	4.16805e-06	1.845	0.95	4.16	0.924	3.798	1.425	2.318	0.902	1.354	1.093	1.139	0.254	3	3-
482	ATP1B2	108	86	432	119	148	64	185	41	193	62	69	21	-12.1237	-1.44515	17.4922	2.88493e-05	0.000298299	0.3874	1.45621e-27	0.00020705	4.53777e-19	4.90142e-19	1.35191e-06	1.264	1.094	4.496	1.596	1.811	1.041	2.646	0.674	2.871	0.853	1.463	0.457	3	3-
731424	LOC731424	256	16	185	9	316	32	43	13	89	10	154	28	-12.3633	-3.12493	66.9377	2.80224e-16	2.42054e-14	1.28159e-52	2.7561e-34	4.69247e-44	0.000663657	7.25333e-18	1.93466e-21	2.958	0.201	1.901	0.119	3.818	0.514	0.607	0.211	1.307	0.136	3.224	0.602	3	3-
54810	GIPC2	138	92	233	62	94	27	195	39	40	19	91	21	-12.4542	-1.58973	20.4714	6.05305e-06	7.31454e-05	0.0167137	6.46184e-16	6.89255e-06	1.00297e-21	0.00499844	6.53572e-11	1.938	1.403	2.912	0.997	1.379	0.527	3.339	0.768	0.713	0.314	2.314	0.548	3	3-
2352	FOLR3	25	4	1531	63	31	4	40	1	49	2	5	0	-11.7083	-3.99817	69.943	6.10419e-17	6.01535e-15	0.000203135	1.14593e-292	9.08039e-05	3.55612e-10	1.06446e-12	0.115574	1.54	0.264	85.658	4.442	1.953	0.343	2.89	0.084	3.766	0.147	0.55	0	3	3-
57165	GJC2	66	16	122	85	161	28	151	40	99	17	17	3	-12.4876	-1.90411	26.1468	3.16421e-07	5.04686e-06	2.06962e-07	0.536219	1.75001e-16	1.43455e-13	9.7619e-17	0.00609095	1.112	0.293	1.832	1.64	2.829	0.656	3.095	0.944	2.116	0.337	0.518	0.094	3	3-
158062	LCN6	77	17	55	8	83	14	14	4	5	9	1	0	-13.519	-1.84988	17.5892	2.74136e-05	0.000285848	2.95493e-09	2.2549e-07	5.90535e-09	0.0628211	0.566581	1	6.024	1.415	3.904	0.715	6.61	1.521	1.27	0.42	0.481	0.834	0.138	0	3	3-
7139	TNNT2	40	14	39	17	100	21	30	10	52	12	44	6	-13.2252	-1.85862	24.0869	9.20859e-07	1.32118e-05	0.00269283	0.0897934	5.84487e-09	0.0149252	1.58803e-07	1.21756e-07	1.555	0.601	1.321	0.759	4.159	1.135	1.49	0.564	2.62	0.542	3.146	0.436	3	3-
554223	LOC554223	31	2	66	3	45	4	29	13	7	1	47	9	-13.7618	-2.81004	40.9434	1.56701e-10	4.71903e-09	3.00466e-07	1.40363e-12	4.91254e-07	0.0854959	0.0635943	9.06268e-07	1.469	0.102	2.774	0.163	2.218	0.263	1.67	0.854	0.416	0.055	3.977	0.783	3	3-
1128	CHRM1	6	10	154	33	443	6	127	0	222	2	27	1	-12.3726	-4.14387	78.0222	1.01888e-18	1.28062e-16	0.451288	9.9344e-14	1.92647e-97	1.18566e-34	2.54425e-66	7.67385e-07	0.083	0.151	1.906	0.526	6.435	0.116	2.154	0	3.921	0.033	0.68	0.026	3	3-
100131825	LOC100131825	197	50	266	75	234	79	108	47	55	25	72	18	-12.0984	-1.5712	20.4996	5.9645e-06	7.22001e-05	1.04632e-19	8.19368e-17	1.13812e-10	5.18382e-05	0.000648222	3.16586e-08	2.87	0.793	3.419	1.251	3.586	1.598	1.943	0.966	1.02	0.426	1.901	0.487	3	3-
81027	TUBB1	178	89	120	38	363	26	78	25	790	35	114	32	-11.6667	-2.30943	38.7247	4.88004e-10	1.33898e-08	1.24662e-06	8.50264e-07	1.69187e-57	7.48714e-06	3.9243e-201	2.54491e-11	1.989	1.081	1.192	0.487	4.242	0.404	1.066	0.393	11.223	0.46	2.308	0.665	3	3-
5322	PLA2G5	42	20	194	34	117	15	122	75	159	49	49	22	-12.4098	-1.63834	20.9171	4.79583e-06	5.91795e-05	0.0249168	3.77331e-20	1.62881e-14	0.0183466	2.38222e-16	0.00439098	0.924	0.477	3.81	0.856	2.678	0.458	3.25	2.303	4.427	1.27	1.946	0.899	3	3-
117157	SH2D1B	29	12	83	21	69	7	108	22	109	2	81	13	-12.8892	-2.61197	45.1387	1.8356e-11	6.49734e-10	0.0191903	8.5009e-07	8.67295e-10	2.43041e-12	6.32504e-32	1.79505e-12	0.458	0.206	1.168	0.38	1.138	0.154	2.078	0.487	2.185	0.037	2.316	0.382	3	3-
199800	C19orf76	110	25	174	30	77	25	123	36	61	19	16	9	-12.6278	-1.76726	23.5443	1.22071e-06	1.71504e-05	1.27089e-12	1.79392e-18	0.000252099	9.22502e-10	1.29555e-06	0.364149	2.155	0.531	3.041	0.673	1.571	0.681	2.925	0.986	1.514	0.438	0.566	0.328	3	3-
314	AOC2	67	32	111	24	77	13	86	35	53	25	41	14	-12.8264	-1.57589	19.3074	1.11276e-05	0.000126732	0.0021491	4.15308e-10	9.77373e-09	0.000100925	0.00127129	0.000932752	2.134	0.565	2.37	0.445	2.773	0.661	1.714	0.981	1.195	0.476	1.211	0.429	3	3-
56113	PCDHGA2	112	37	327	78	161	56	181	46	150	163	67	25	-12.1489	-1.37027	15.6909	7.45826e-05	0.000698879	1.81097e-08	7.44157e-25	4.67632e-07	1.86199e-16	1	4.21445e-05	1.744	0.623	4.532	1.39	2.609	1.211	3.415	0.996	2.942	2.98	1.875	0.72	3	3-
1084	CEACAM3	57	21	27	5	58	9	25	13	44	3	8	2	-13.7895	-2.08922	25.5562	4.29681e-07	6.60733e-06	0.000289502	0.00163726	1.2357e-06	0.245191	2.11967e-10	0.191124	2.339	0.929	0.997	0.235	2.456	0.514	1.224	0.737	2.27	0.146	0.59	0.152	3	3-
5409	PNMT	18	23	91	25	102	4	37	3	87	3	3	2	-12.9248	-2.49761	32.0394	1.51077e-08	3.10893e-07	0.385557	2.08972e-06	2.35304e-19	7.99238e-08	4.17774e-24	1	0.717	0.989	3.263	1.141	4.197	0.222	1.76	0.165	4.361	0.142	0.215	0.148	3	3-
5473	PPBP	26	1	268	13	121	16	3	0	154	35	18	15	-12.4039	-2.71157	39.7101	2.94601e-10	8.44763e-09	9.34355e-07	1.25906e-49	6.35569e-15	0.396517	4.95349e-21	0.976413	0.906	0.038	8.385	0.519	4.363	0.775	0.125	0	6.761	1.442	1.129	0.97	3	3-
7124	TNF	139	20	53	20	132	23	87	76	98	25	83	54	-12.2142	-1.52356	17.6438	2.66376e-05	0.000278586	1.7043e-21	0.00713673	1.45749e-13	1	1.51708e-12	0.0341226	3.587	0.559	1.223	0.591	3.539	0.825	2.711	2.733	3.197	0.761	3.865	2.588	3	3-
10349	ABCA10	186	151	508	123	291	101	297	92	136	110	382	62	-11.1119	-1.36909	16.0036	6.32232e-05	0.000602583	0.270408	5.94568e-38	1.99791e-12	4.03114e-21	0.0367975	3.62865e-56	1.106	0.979	2.675	0.838	1.818	0.834	2.178	0.773	1.032	0.767	4.127	0.686	3	3-
4489	MT1A	115	6	10	1	70	8	8	0	21	1	6	0	-13.4059	-3.89024	54.1839	1.82575e-13	9.19006e-12	3.79007e-25	0.0197191	1.68926e-09	0.0178302	1.33688e-05	0.0615499	21.269	1.151	1.773	0.211	12.565	2.064	1.579	0	4.637	0.227	1.915	0	3	3-
7448	VTN	54	12	106	25	135	39	108	37	55	23	21	8	-12.4754	-1.66146	21.0422	4.49274e-06	5.57674e-05	1.60173e-06	7.59258e-09	3.08371e-08	3.695e-07	0.000218918	0.048619	1.385	0.333	2.431	0.734	3.596	1.39	3.345	1.322	1.783	0.696	0.972	0.381	3	3-
10316	NMUR1	60	20	142	20	172	10	203	33	235	12	69	16	-12.0102	-2.84769	56.8523	4.6981e-14	2.65804e-12	5.14599e-05	8.63199e-18	5.66886e-30	6.61116e-27	3.09499e-58	2.08399e-08	0.72	0.261	1.516	0.275	2.158	0.167	2.976	0.556	3.584	0.169	1.5	0.357	3	3-
146225	CMTM2	54	8	23	7	32	8	22	4	53	2	11	0	-13.4983	-2.73938	38.4295	5.67683e-10	1.53993e-08	2.53531e-08	0.0266651	0.00664676	0.001442	7.9861e-14	0.00243069	3.945	0.626	1.541	0.586	2.376	0.814	1.867	0.399	4.838	0.175	1.439	0	3	3-
5649	RELN	443	97	605	322	277	183	795	190	84	42	178	41	-11.3668	-1.43731	17.4006	3.02737e-05	0.00031134	9.57187e-49	1.81406e-08	0.223391	1.06549e-74	8.15444e-05	1.03268e-20	4.294	2.325	5.603	3.27	4.79	2.31	5.32	1.992	0.343	0.55	1.036	0.244	3	2-
23284	LPHN3	134	72	321	70	135	55	386	18	175	354	282	27	-11.6956	-1.77036	22.1769	2.48643e-06	3.28239e-05	0.000227091	6.98869e-27	0.000148252	6.54045e-82	4.05254e-11	1.3653e-53	0.822	0.481	1.748	0.492	0.868	0.469	2.908	0.156	1.368	2.551	3.141	0.308	3	2-
89780	WNT3A	63	71	353	13	326	15	100	2	385	271	29	4	-11.8124	-2.7635	44.2657	2.86698e-11	9.83298e-10	0.412632	8.8396e-70	2.92279e-59	2.10932e-24	4.82102e-08	3.36993e-05	0.836	1.023	4.167	0.198	4.518	0.277	1.619	0.037	6.488	4.229	0.697	0.099	3	2-
23138	N4BP3	177	85	454	235	288	105	1151	233	462	226	168	45	-10.7132	-1.40537	17.38	3.06026e-05	0.000314261	3.59016e-07	2.89919e-07	5.94475e-11	1.27096e-125	4.73277e-24	4.13589e-17	1.116	0.583	2.539	1.697	1.902	0.92	8.905	2.07	3.709	1.673	1.921	0.528	3	2-
84074	QRICH2	179	50	389	151	493	58	233	135	207	74	68	47	-11.544	-1.47259	18.0829	2.1149e-05	0.000226373	2.97513e-16	4.03618e-14	1.73783e-62	0.000105473	3.3516e-18	0.114981	1.255	0.381	2.42	1.213	3.621	0.565	2.004	1.333	1.848	0.609	0.865	0.613	3	1-

## Sheet: DEI list
UP regulated in cancer				DOWN regulated in cancer
Gene Symbol	Accession	nPatDE	nPat2fold	Gene Symbol	Accession	nPatDE	nPat2fold		Number of up-regulated isoforms in tumors
LSR	NM_205835	6	6	S100A4	NM_002961	6	6		nPatDE	nPat2fold					Sum
CP	NM_000096	6	6	TCF21	NM_198392	6	6			6	5	4	3	2
MSL3P1	NR_024322	6	6	CYP4B1	NM_001099772	6	6		6	81	50	18	2		151
SRPX2	NM_014467	6	6	COX7A1	NM_001864	6	6		5	9	90	21			120
CCNB1	NM_031966	6	6	CLEC3B	NM_003278	6	6		4	3	17	73	1		94
SPDEF	NM_012391	6	6	PECAM1	NM_000442	6	6		3	3	6	9	76	1	95
ECT2	NM_018098	6	6	NOVA2	NM_002516	6	6		Sum	96	163	121	79	1	460
SBK1	NM_001024401	6	6	FLT4	NM_182925	6	6
FERMT1	NM_017671	6	6	PEAR1	NM_001080471	6	6		Number of down-regulated isoforms in tumors
SERINC2	NM_178865	6	6	CAV1	NM_001753	6	6		nPatDE	nPat2fold						Sum
PYCR1	NM_006907	6	6	SLC39A8	NM_001135147	6	6			6	5	4	3	2	1
PPAP2C	NM_003712	6	6	KLF9	NM_001206	6	6		6	260	133	52	7	1		453
B3GNT3	NM_014256	6	6	RNF122	NM_024787	6	6		5	18	132	49	3			202
CEACAM6	NM_002483	6	6	TCF21	NM_003206	6	6		4	10	20	64	14	1		109
ENPP3	NM_005021	6	6	C11orf9	NM_001127392	6	6		3	1	18	21	53	2	1	96
ST14	NM_021978	6	6	BCL6B	NM_181844	6	6		Sum	289	303	186	77	4	1	860
PODXL2	NM_015720	6	6	PCDH17	NM_001040429	6	6
SRD5A3	NM_024592	6	6	SCUBE1	NM_173050	6	6
FGF11	NM_004112	6	6	HSPB2	NM_001541	6	6
SLC25A10	NM_012140	6	6	SCN4B	NM_174934	6	6		Number of differentially regulated isoforms
ENPP5	NM_021572	6	6	TSPAN18	NM_130783	6	6		nPatDE	nPat2fold (UP)					nPat2fold (DOWN)						Sum
PRDX4	NM_006406	6	6	NKD1	NM_033119	6	6			6	5	4	3	2	6	5	4	3	2	1
TSPAN6	NM_003270	6	6	BMPER	NM_133468	6	6		6	81	50	18	2		260	133	52	7	1		610
CRABP2	NM_001878	6	6	DPT	NM_001937	6	6		5	9	90	21			18	132	49	3			327
KCNK5	NM_003740	6	6	RAMP2	NM_005854	6	6		4	3	17	73	1		10	20	64	14	1		207
KNTC1	NM_014708	6	6	SDPR	NM_004657	6	6		3	3	6	9	76	1	1	18	21	53	2	1	194
SEPT9	NM_001113492	6	6	BMP6	NM_001718	6	6		Sum	96	163	121	79	1	289	303	186	77	4	1	1320
PDIA4	NM_004911	6	6	SLIT2	NM_004787	6	6
CTHRC1	NM_138455	6	6	NES	NM_006617	6	6
CHRNB1	NM_000747	6	6	SIK1	NM_173354	6	6
MUC20	NM_152673	6	6	NPNT	NM_001184690	6	6
ABCC3	NM_003786	6	6	C19orf59	NM_174918	6	6
LOC100499467	NR_036488	6	6	C11orf9	NM_013279	6	6
FLJ22184	NM_001190467	6	6	PKN3	NM_013355	6	6
B4GALNT3	NM_173593	6	6	AFAP1L1	NM_152406	6	6
LOC100128338	NR_033849	6	6	MAP3K8	NM_005204	6	6
PTK6	NM_005975	6	6	CLEC14A	NM_175060	6	6
SPAG4	NM_003116	6	6	LOC100507632	NR_038236	6	6
SPINK1	NM_003122	6	6	KLF2	NM_016270	6	6
LOC440335	NR_029454	6	6	STARD9	NM_020759	6	6
KRT15	NM_002275	6	6	LPHN2	NM_012302	6	6
HMGB3	NM_005342	6	6	MFAP4	NM_001198695	6	6
KIF2C	NM_006845	6	6	SOCS3	NM_003955	6	6
PVT1	NR_003367	6	6	CD300E	NM_181449	6	6
DEPTOR	NM_022783	6	6	FSTL3	NM_005860	6	6
SPTBN2	NM_006946	6	6	LRRC32	NM_001128922	6	6
CDH3	NM_001793	6	6	TNNC1	NM_003280	6	6
TK1	NM_003258	6	6	CAV1	NM_001172896	6	6
OCIAD2	NM_001014446	6	6	GRK5	NM_005308	6	6
RALGPS2	NM_152663	6	6	AATK	NM_001080395	6	6
GPT2	NM_133443	6	6	GPIHBP1	NM_178172	6	6
CCNO	NM_021147	6	6	EGR1	NM_001964	6	6
GLB1L2	NM_138342	6	6	NR4A1	NM_002135	6	6
CDC20	NM_001255	6	6	FHL1	NM_001159702	6	6
ERO1L	NM_014584	6	6	PMP22	NM_000304	6	6
MMP11	NM_005940	6	6	NPR1	NM_000906	6	6
PVRL1	NM_002855	6	6	CD93	NM_012072	6	6
MYOF	NM_133337	6	6	KANK3	NM_198471	6	6
LOC100129917	NR_036511	6	6	UPK3B	NM_030570	6	6
CEACAM5	NM_004363	6	6	NOTCH4	NM_004557	6	6
PSD3	NM_015310	6	6	ID1	NM_002165	6	6
GPR110	NM_153840	6	6	MT1M	NM_176870	6	6
SIX1	NM_005982	6	6	GATA6	NM_005257	6	6
COL10A1	NM_000493	6	6	COL6A6	NM_001102608	6	6
COL11A1	NM_001854	6	6	ANKRD29	NM_173505	6	6
CST1	NM_001898	6	6	SVEP1	NM_153366	6	6
TMEM45B	NM_138788	6	6	CCDC48	NM_024768	6	6
PLAT	NM_000930	6	6	NR4A1	NM_173157	6	6
ENC1	NM_003633	6	6	FXYD1	NM_021902	6	6
AGR2	NM_006408	6	6	CTNNAL1	NM_003798	6	6
EFNA4	NM_005227	6	6	KL	NM_004795	6	6
FER1L4	NR_024377	6	6	HBB	NM_000518	6	6
SLFN13	NM_144682	6	6	C17orf91	NR_028502	6	6
LAD1	NM_005558	6	6	FHL5	NM_020482	6	6
CDH1	NM_004360	6	6	FGFBP2	NM_031950	6	6
MYBL2	NM_002466	6	6	C5AR1	NM_001736	6	6
STK39	NM_013233	6	6	PDK4	NM_002612	6	6
FBXO32	NM_058229	6	6	ACE	NM_000789	6	6
FAM83A	NM_207006	6	6	DES	NM_001927	6	6
PVRL4	NM_030916	6	6	C13orf15	NM_014059	6	6
GALNT7	NM_017423	6	6	RASIP1	NM_017805	6	6
PAFAH1B3	NM_002573	5	6	TEK	NM_000459	6	6
FUT2	NM_001097638	5	6	TMEM88	NM_203411	6	6
ADAM15	NM_207195	5	6	FIGF	NM_004469	6	6
GJB1	NM_001097642	5	6	SFTPA2	NM_001098668	6	6
MDK	NM_002391	5	6	TSPAN7	NM_004615	6	6
GSDMB	NM_001165958	5	6	ADAMTS8	NM_007037	6	6
GOLM1	NM_177937	5	6	PLAC9	NM_001012973	6	6
PSAT1	NM_058179	5	6	FUT1	NM_000148	6	6
DERL3	NM_198440	5	6	NR4A2	NM_006186	6	6
C1orf106	NM_001142569	4	6	PTPLA	NM_014241	6	6
PPP1R1B	NM_181505	4	6	CD36	NM_001001548	6	6
CEACAM1	NM_001024912	4	6	S100A8	NM_002964	6	6
YWHAZ	NM_001135700	3	6	STX11	NM_003764	6	6
SRI	NM_198901	3	6	ADH1B	NM_000668	6	6
TLE6	NM_001143986	3	6	HSPB8	NM_014365	6	6
SPP1	NM_001040058	6	5	KCNMB4	NM_014505	6	6
KIF20A	NM_005733	6	5	ABLIM3	NM_014945	6	6
POU2AF1	NM_006235	6	5	CDC42EP2	NM_006779	6	6
CD79A	NM_001783	6	5	SYNM	NM_145728	6	6
KDELR3	NM_006855	6	5	CLDN18	NM_016369	6	6
MMP7	NM_002423	6	5	AOC3	NM_003734	6	6
RHPN1	NM_052924	6	5	CDH5	NM_001795	6	6
BUB1	NM_004336	6	5	SEMA5A	NM_003966	6	6
C16orf75	NM_152308	6	5	KIAA1462	NM_020848	6	6
CLDN3	NM_001306	6	5	GPM6A	NM_201592	6	6
CDCA5	NM_080668	6	5	GPR146	NM_138445	6	6
AHNAK2	NM_138420	6	5	GRASP	NM_181711	6	6
UNC5CL	NM_173561	6	5	CAPZB	NM_001206540	6	6
PRSS22	NM_022119	6	5	ARHGAP31	NM_020754	6	6
VSTM2L	NM_080607	6	5	ADAMTSL3	NM_207517	6	6
PDXDC1	NM_015027	6	5	BAALC	NM_024812	6	6
SYT7	NM_004200	6	5	HIGD1B	NM_016438	6	6
ANKRD56	NM_001029870	6	5	KCNK3	NM_002246	6	6
ATP1B1	NM_001677	6	5	LYVE1	NM_006691	6	6
TOP2A	NM_001067	6	5	MAL	NM_002371	6	6
LGR4	NM_018490	6	5	STXBP6	NM_014178	6	6
GRHL1	NM_198182	6	5	SOCS2	NM_003877	6	6
SLC2A1	NM_006516	6	5	HBA1	NM_000558	6	6
ST6GALNAC1	NM_018414	6	5	CA4	NM_000717	6	6
ITGA11	NM_001004439	6	5	FOS	NM_005252	6	6
ZNF117	NM_015852	6	5	MYCT1	NM_025107	6	6
NLN	NM_020726	6	5	DUSP1	NM_004417	6	6
HOOK1	NM_015888	6	5	SFTPC	NM_003018	6	6
RNF43	NM_017763	6	5	KLF4	NM_004235	6	6
GOLGA7B	NM_001010917	6	5	DACH1	NM_080759	6	6
CXCL14	NM_004887	6	5	MDGA1	NM_153487	6	6
HOXB2	NM_002145	6	5	ID2	NM_002166	6	6
CLIC6	NM_053277	6	5	GPD1	NM_005276	6	6
MFSD4	NM_181644	6	5	CASKIN2	NM_020753	6	6
GMDS	NM_001500	6	5	CDO1	NM_001801	6	6
EPCAM	NM_002354	6	5	SFTPA1	NM_005411	6	6
PDK1	NM_002610	6	5	ADAMTS4	NM_005099	6	6
SLC5A3	NM_006933	6	5	CLIC3	NM_004669	6	6
MACC1	NM_182762	6	5	LIMS2	NM_001161403	6	6
PGM2L1	NM_173582	6	5	LOC400550	NR_036444	6	6
TFAP2C	NM_003222	6	5	SPTAN1	NM_001130438	6	6
ANKRD22	NM_144590	6	5	CSRNP1	NM_033027	6	6
MAD2L1	NM_002358	6	5	SEMA6A	NM_020796	6	6
SLC50A1	NM_018845	6	5	DLL4	NM_019074	6	6
CILP	NM_003613	6	5	HBA2	NM_000517	6	6
SLC41A2	NM_032148	6	5	RAMP3	NM_005856	6	6
SGPP2	NM_152386	6	5	ERG	NM_004449	6	6
GJB2	NM_004004	6	5	LDB2	NM_001130834	6	6
RAMP1	NM_005855	6	5	FCGR3B	NM_000570	6	6
CAPN13	NM_144575	6	5	FGD5	NM_152536	6	6
IGF2BP3	NM_006547	5	5	GKN2	NM_182536	6	6
SPP1	NM_000582	5	5	AGAP11	NM_133447	6	6
IL13RA2	NM_000640	5	5	PTN	NM_002825	6	6
MAGED2	NM_201222	5	5	TGM1	NM_000359	6	6
C20orf103	NM_012261	5	5	RTKN2	NM_145307	6	6
ENAH	NM_001008493	5	5	CXCR1	NM_000634	6	6
SPACA4	NM_133498	5	5	FAM162B	NM_001085480	6	6
AFAP1-AS1	NR_026892	5	5	GJA4	NM_002060	6	6
PDGFC	NM_016205	5	5	SOSTDC1	NM_015464	6	6
SMPDL3B	NM_001009568	5	5	FCN1	NM_002003	6	6
ARSE	NM_000047	5	5	GADD45B	NM_015675	6	6
GSDMB	NM_001165959	5	5	NRN1	NM_016588	6	6
MX2	NM_002463	5	5	IL6	NM_000600	6	6
SMPDL3B	NM_014474	5	5	ADRB2	NM_000024	6	6
NQO1	NM_000903	5	5	AKAP2	NM_001136562	6	6
PTPRH	NM_002842	5	5	JUNB	NM_002229	6	6
THNSL1	NM_024838	5	5	LOC100302650	NR_028308	6	6
LOC440335	NR_029455	5	5	LOC400550	NR_033925	6	6
HN1L	NM_144570	5	5	RHOJ	NM_020663	6	6
C8orf47	NM_173549	5	5	TAL1	NM_003189	6	6
NASP	NM_002482	5	5	FAM150B	NM_001002919	6	6
CXCL13	NM_006419	5	5	LAMC3	NM_006059	6	6
DERL3	NM_001002862	5	5	F10	NM_000504	6	6
PLK1	NM_005030	5	5	GIMAP8	NM_175571	6	6
ANLN	NM_018685	5	5	EMCN	NM_016242	6	6
REEP6	NM_138393	5	5	SHANK3	NM_001080420	6	6
HABP2	NM_004132	5	5	CXCL2	NM_002089	6	6
FCGBP	NM_003890	5	5	PRX	NM_181882	6	6
MMP1	NM_002421	5	5	SFTPA1	NM_001093770	6	6
HOXD1	NM_024501	5	5	ABCA8	NM_007168	6	6
SPP1	NM_001040060	5	5	TIE1	NM_005424	6	6
FA2H	NM_024306	5	5	GRRP1	NM_024869	6	6
PCSK1N	NM_013271	5	5	ANXA8L2	NM_001630	6	6
HS6ST2	NM_147175	5	5	ZBED2	NM_024508	6	6
LY6D	NM_003695	5	5	GSTM5	NM_000851	6	6
HKDC1	NM_025130	5	5	MMRN2	NM_024756	6	6
TPX2	NM_012112	5	5	ITPRIP	NM_033397	6	6
TMEM184A	NM_001097620	5	5	JUND	NM_005354	6	6
FAM83A	NM_032899	5	5	TACC1	NM_001146216	6	6
ERV3-1	NM_001007253	5	5	S1PR1	NM_001400	6	6
CXCL17	NM_198477	5	5	ESAM	NM_138961	6	6
GRHL2	NM_024915	5	5	CLEC1A	NM_016511	6	6
CENPF	NM_016343	5	5	SLC5A4	NM_014227	6	6
MZB1	NM_016459	5	5	LAMP3	NM_014398	6	6
IQGAP3	NM_178229	5	5	UPK3B	NM_182684	6	6
C8orf39	NR_027259	5	5	SLCO2A1	NM_005630	6	6
XDH	NM_000379	5	5	PPARG	NM_015869	6	6
CDK1	NM_001786	5	5	GRIA1	NM_001114183	6	6
DNAJC22	NM_024902	5	5	FRMD3	NM_174938	6	6
IGLL5	NM_001178126	5	5	HSPB6	NM_144617	6	6
KCNN4	NM_002250	5	5	PPM1F	NM_014634	6	6
BACE2	NM_012105	5	5	PPP1R15A	NM_014330	6	6
WDR66	NM_144668	5	5	PCDH12	NM_016580	6	6
ZNF486	NM_052852	5	5	C20orf46	NM_018354	6	6
VEZT	NM_017599	5	5	DENND2A	NM_015689	6	6
RHBDL2	NM_017821	5	5	MYOC	NM_000261	6	6
PROM2	NM_001165978	5	5	FAM107A	NM_001076778	6	6
GCNT3	NM_004751	5	5	S100A12	NM_005621	6	6
WFDC2	NM_006103	5	5	SCARA5	NM_173833	6	6
SLC9A7	NM_032591	5	5	TBX2	NM_005994	6	6
GINS2	NM_016095	5	5	ANXA8L1	NM_001098845	6	6
POF1B	NM_024921	5	5	AQP1	NM_198098	6	6
KIAA0101	NM_014736	5	5	HBEGF	NM_001945	6	6
METTL7B	NM_152637	5	5	INMT	NM_006774	6	6
FHL2	NM_001450	5	5	BTNL9	NM_152547	6	6
TMEM159	NM_020422	5	5	CYYR1	NM_052954	6	6
COL17A1	NM_000494	5	5	STARD13	NM_178006	6	6
CRLF1	NM_004750	5	5	EPAS1	NM_001430	6	6
MUC21	NM_001010909	5	5	CD34	NM_001773	6	6
DSP	NM_004415	5	5	ITM2A	NM_004867	6	6
ABP1	NM_001091	5	5	HEG1	NM_020733	6	6
ARHGAP40	NM_001164431	5	5	PTPRM	NM_002845	6	6
RHOV	NM_133639	5	5	CD97	NM_078481	6	6
CCNB2	NM_004701	5	5	S100A3	NM_002960	6	6
WFDC3	NM_080614	5	5	CXorf36	NM_176819	6	6
PLAU	NM_002658	5	5	CXCL3	NM_002090	6	6
CDCA8	NM_018101	5	5	SH3BP5	NM_004844	6	6
HOXB7	NM_004502	5	5	GDF10	NM_004962	6	6
SCUBE3	NM_152753	5	5	TTLL7	NM_024686	6	6
UBE2T	NM_014176	5	5	SLC39A8	NM_001135146	6	6
LOC151009	NR_027244	5	5	ITLN1	NM_017625	6	6
TUBB3	NM_006086	5	5	C11orf96	NM_001145033	6	6
ALDOA	NM_184043	5	5	FOXF1	NM_001451	6	6
PLEK2	NM_016445	5	5	PTRF	NM_012232	6	6
CDKN3	NM_005192	5	5	TNXB	NM_019105	6	6
COMP	NM_000095	5	5	AREG	NM_001657	6	6
C8orf73	NM_001100878	5	5	ABI3BP	NM_015429	6	6
MANEAL	NM_001113482	5	5	PKNOX2	NM_022062	6	6
NT5E	NM_002526	5	5	C20orf160	NM_080625	6	6
ANKRD36BP2	NR_015424	5	5	NCKAP5	NM_207363	6	6
ISLR	NM_201526	4	5	SEMA3B	NM_004636	6	6
SLC39A11	NM_001159770	4	5	THBD	NM_000361	6	6
UBE2C	NM_007019	4	5	SOX7	NM_031439	6	6
KRT80	NM_182507	4	5	CAV1	NM_001172895	6	6
FUT8	NR_038170	4	5	ZFP36	NM_003407	6	6
TOX3	NM_001080430	4	5	COX4I2	NM_032609	6	6
MIA	NM_006533	4	5	ROBO4	NM_019055	6	6
GREM1	NM_013372	4	5	ECSCR	NM_001077693	6	6
PODNL1	NM_024825	4	5	HAS1	NM_001523	6	6
SULF1	NM_001128205	4	5	FOSB	NM_006732	6	6
TRIM2	NM_015271	4	5	SPOCK2	NM_014767	6	6
HIST1H2BD	NM_021063	4	5	SOX17	NM_022454	6	6
FHL2	NM_001039492	4	5	ADAMTS1	NM_006988	6	6
ALG1L	NM_001015050	4	5	LHFP	NM_005780	6	6
ZWINT	NM_007057	4	5	VWF	NM_000552	6	6
HIST1H2BG	NM_003518	4	5	PGM5	NM_021965	6	6
ACHE	NM_000665	4	5	ANGPTL1	NM_004673	6	6
DERL3	NM_001135751	3	5	C10orf116	NM_006829	6	6
MUC1	NM_001204293	3	5	SASH1	NM_015278	6	6
UCHL5	NM_001199261	3	5	ADAMTS15	NM_139055	6	6
PDGFC	NR_036641	3	5	ABHD6	NM_020676	6	6
SYTL2	NM_001162953	3	5	ANKRD1	NM_014391	6	6
IGSF9	NM_001135050	3	5	CCBE1	NM_133459	6	6
COL3A1	NM_000090	6	4	ITLN2	NM_080878	6	6
LAPTM4B	NM_018407	6	4	TMEM100	NM_018286	5	6
THBS2	NM_003247	6	4	ERG	NM_182918	5	6
COL1A1	NM_000088	6	4	STARD8	NM_001142504	5	6
DPP4	NM_001935	6	4	CAMP	NM_004345	5	6
SOX4	NM_003107	6	4	CYP4B1	NM_000779	5	6
CD24	NM_013230	6	4	CD36	NM_001001547	5	6
TSPAN1	NM_005727	6	4	ACVRL1	NM_000020	5	6
CAPN8	NM_001143962	6	4	ADAM33	NM_025220	5	6
GALNT6	NM_007210	6	4	LRRFIP1	NM_001137551	5	6
F2RL1	NM_005242	6	4	FLI1	NM_002017	5	6
CFB	NM_001710	6	4	SLC25A25	NM_052901	5	6
PIGR	NM_002644	6	4	ARHGEF4	NM_015320	5	6
RAB27B	NM_004163	6	4	PLEKHA1	NM_001195608	5	6
STEAP1	NM_012449	6	4	CAV2	NM_001206748	5	6
MAL2	NM_052886	6	4	PHLDB2	NM_001134437	5	6
SPINT2	NM_021102	6	4	GNLY	NM_006433	5	6
MPZL2	NM_005797	6	4	ZDHHC14	NM_153746	5	6
ADAM28	NM_014265	5	4	MARK3	NM_001128918	5	6
HELLS	NM_018063	5	4	SMARCC2	NM_139067	4	6
FAP	NM_004460	5	4	CLDN5	NM_003277	4	6
EFHC2	NM_025184	5	4	THSD1	NM_199263	4	6
PCP4L1	NM_001102566	5	4	FPR1	NM_001193306	4	6
LOC100130557	NR_024567	5	4	ITM2A	NM_001171581	4	6
SLC39A11	NM_139177	5	4	HSPA12B	NM_052970	4	6
FRK	NM_002031	5	4	MCL1	NM_182763	4	6
SLC17A9	NM_022082	5	4	EPB41L2	NM_001199389	4	6
CCBP2	NM_001296	5	4	FCN3	NM_173452	4	6
HHLA2	NM_007072	5	4	C1orf183	NM_019099	4	6
TONSL	NM_013432	5	4	GIMAP6	NR_024115	3	6
TXNDC17	NM_032731	5	4	GYPC	NM_002101	6	5
SCIN	NM_001112706	5	4	SNAI1	NM_005985	6	5
S100A2	NM_005978	5	4	SELE	NM_000450	6	5
C6orf141	NM_001145652	5	4	BMP5	NM_021073	6	5
EGLN3	NM_022073	5	4	SGCA	NM_000023	6	5
COL9A2	NM_001852	5	4	GPR4	NM_005282	6	5
CD180	NM_005582	5	4	OLFML2A	NM_182487	6	5
GPR160	NM_014373	5	4	TBX4	NM_018488	6	5
IGFBP2	NM_000597	5	4	C14orf132	NR_023938	6	5
TROAP	NM_005480	4	4	GALNTL4	NM_198516	6	5
DNAJC12	NM_021800	4	4	SFTPC	NM_001172410	6	5
ACSM3	NM_005622	4	4	SLIT3	NM_003062	6	5
KLHDC7A	NM_152375	4	4	TMEM139	NM_153345	6	5
CDC6	NM_001254	4	4	PTPN21	NM_007039	6	5
GPR87	NM_023915	4	4	FBLN1	NM_001996	6	5
TNFRSF17	NM_001192	4	4	SPTAN1	NM_001195532	6	5
STX1A	NM_004603	4	4	GIMAP6	NM_024711	6	5
EIF3C	NM_001199142	4	4	PPARGC1A	NM_013261	6	5
[truncated: 553 more rows]

## Sheet: DEI_reads.edgeR.FVKM.2fold
Entrez GeneID	Gene Symbol	Isoform Accession	reads P1N	reads P1T	reads P3N	reads P3T	reads P4N	reads P4T	reads P5N	reads P5T	reads P6N	reads P6T	reads P8N	reads P8T	logConc	logFC	LR.statistic	p.value	edgeR FDR	edgeR P1.FDR	edgeR P3.FDR	edgeR P4.FDR	edgeR P5.FDR	edgeR P6.FDR	edgeR P8.FDR	FVKM P1N	FVKM P1T	FVKM P3N	FVKM P3T	FVKM P4N	FVKM P4T	FVKM P5N	FVKM P5T	FVKM P6N	FVKM P6T	FVKM P8N	FVKM P8T	nPatDE	nPat2fold
[truncated: 1,320 more rows]
