# Supplementary material for: A High-Dimensional, Deep-Sequencing Study of Lung Adenocarcinoma in Female Never-Smokers
Source: PLoS One. 2013 Feb 6;8(2):e55596. doi: 10.1371/journal.pone.0055596 (PMC3566005; doi:10.1371/journal.pone.0055596)
Supplement: File S3 — MicroRNA expression plot for tumor and normal tissues. (XLS) [file pone.0055596.s003.xls]

## Sheet: LungCancer.patients.smallRNA.DE
miRNA ID	miRNA expression value after TMM normalization												logConc	logFC	LR.statistic	p.value	FDR	edgeR P1.FDR	edgeR P3.FDR	edgeR P4.FDR	edgeR P5.FDR	edgeR P6.FDR	edgeR P8.FDR	nPatDE	nPat2fold
	P1N	P1T	P3N	P3T	P4N	P4T	P5N	P5T	P6N	P6T	P8N	P8T
hsa-miR-9	230	4041	141	1169	255	2715	223	901	291	796	238	380	-9.64718	2.44082	23.2914	1.39223e-06	5.60688e-05	0	6.41709e-171	0	1.47272e-73	8.71571e-118	6.25694e-06	6	5+
hsa-miR-9*	168	806	35	133	16	243	15	110	27	101	23	72	-11.5303	2.37735	22.9513	1.66159e-06	6.49488e-05	5.72168e-115	1.06776e-10	2.36512e-44	1.95479e-15	3.04979e-20	1.8027e-05	6	6+
hsa-miR-27a*	4638	949	2093	647	3349	489	2327	557	3612	198	6259	1115	-8.75865	-2.59544	28.2397	1.07183e-07	6.47485e-06	0	2.8195e-258	0	2.1567e-302	0	0	6	6-
hsa-miR-30a*	8509	6567	29161	13345	42915	10843	56426	12663	68806	1854	44905	7193	-6.31786	-2.18903	18.8242	1.4334e-05	0.000328446	1.12516e-63	0	0	0	0	0	6	5-
hsa-miR-30c-2*	447	407	1945	368	1512	254	1582	429	1973	117	1331	239	-9.67788	-2.29934	21.3518	3.82268e-06	0.000123911	0.282151	0	1.03998e-197	2.03064e-186	1.58658e-281	3.24886e-186	5	5-
hsa-miR-96	1550	12416	855	5461	653	5556	593	4784	660	1907	503	3186	-8.43845	2.64112	29.752	4.90997e-08	3.10731e-06	0	0	0	0	3.90746e-294	0	6	6+
hsa-miR-126	208519	67765	544777	73108	401098	51575	553956	111830	486053	29358	428958	63203	-4.02599	-2.79042	32.5179	1.18099e-08	9.23253e-07	0	0	0	0	0	0	6	6-
hsa-miR-126*	95918	31570	121856	26740	81520	18844	108038	31380	89888	15705	61946	15614	-5.49701	-2.06026	19.3068	1.11308e-05	0.00027911	0	0	0	0	0	0	6	6-
hsa-miR-127-3p	862	1823	1709	3625	1244	11027	3316	7363	1698	6628	1327	51782	-7.50175	2.144	18.0309	2.17347e-05	0.000452165	1.63598e-95	1.21072e-83	0	2.3234e-218	0	0	6	6+
hsa-miR-134	37	69	57	218	100	524	222	533	165	1043	99	3863	-10.0835	2.30739	20.6969	5.38024e-06	0.000155442	0.00126433	3.68315e-17	8.21689e-55	1.30073e-19	6.56742e-257	0	6	5+
hsa-miR-135a	462	229	1510	133	240	53	1082	87	648	23	291	553	-10.378	-2.47932	20.6153	5.61447e-06	0.000158758	1.16783e-21	0	1.78788e-27	4.77736e-237	5.2262e-108	1.145e-14	6	5-
hsa-miR-135b	2092	13092	1360	6805	513	10862	1073	5367	812	7075	896	6649	-8.02282	2.90463	34.8168	3.62242e-09	4.01183e-07	0	0	0	0	0	0	6	6+
hsa-miR-135b*	36	456	17	199	20	366	11	150	24	173	28	211	-11.5311	3.32123	42.8656	5.8632e-11	1.55844e-08	5.85654e-90	7.38006e-30	6.16085e-79	4.82994e-25	3.86351e-47	1.472e-32	6	6+
hsa-miR-139-5p	879	167	1151	328	890	332	878	204	673	154	950	201	-10.1206	-2.04761	18.7522	1.48852e-05	0.000335296	1.97989e-142	3.00591e-153	1.32053e-58	2.08018e-117	9.80817e-36	2.11422e-119	6	6-
hsa-miR-144	55498	1453	7931	2355	13137	1090	3176	220	9180	3200	9624	2411	-7.34444	-2.97915	33.0517	8.97402e-09	7.8229e-07	0	0	0	0	1.38608e-204	0	6	6-
hsa-miR-144*	186469	6549	56444	29222	128973	15948	37137	2617	138588	19110	101530	21370	-5.4142	-2.98918	33.7099	6.39744e-09	6.54015e-07	0	0	0	0	0	0	6	5-
hsa-miR-182	16005	120316	10927	133619	26772	150445	15723	101808	28811	26757	27171	107034	-5.41613	2.28551	20.8179	5.05095e-06	0.000149171	0	0	0	0	0	0	6	5+
hsa-miR-183	3210	44774	3071	41257	4137	37249	3557	29156	5487	6727	4805	17086	-6.76577	2.67423	27.3334	1.71224e-07	8.42804e-06	0	0	0	0	0	0	6	5+
hsa-miR-183*	48	289	9	96	15	89	9	168	8	49	12	50	-12.2626	2.88225	31.3146	2.19421e-08	1.53479e-06	2.24893e-48	7.81144e-17	5.84445e-11	2.32127e-33	2.17302e-12	2.76742e-05	6	6+
hsa-miR-205	864	18860	635	7377	693	2744	321	303	800	25884	893	45455	-7.37031	3.56597	39.3326	3.57424e-10	6.78594e-08	0	0	3.24896e-216	0.0155792	0	0	5	5+
hsa-miR-206	41	5	58	2	268	1	92	26	446	302	188	4	-11.644	-3.54114	36.635	1.42452e-09	2.10354e-07	1.8597e-09	5.59538e-18	7.64167e-65	2.17237e-11	0.470465	6.9257e-49	5	5-
hsa-miR-210	767	4510	1070	1372	735	2361	736	3636	731	5911	633	5332	-8.72184	2.15796	19.6014	9.53975e-06	0.000248595	0	0.70392	2.31726e-144	0	0	0	5	5+
hsa-miR-301b	55	970	48	176	18	107	32	122	25	212	23	66	-11.4737	2.49165	24.638	6.91735e-07	3.06439e-05	1.06643e-244	2.86585e-13	3.60564e-13	4.29926e-10	1.59001e-58	0.000179638	6	6+
hsa-miR-338-5p	289	103	491	90	922	208	933	176	923	43	1024	172	-10.3504	-2.57699	27.5212	1.5538e-07	7.94228e-06	3.59715e-25	3.87992e-89	1.35918e-99	1.6494e-143	5.87834e-143	3.00292e-149	6	6-
hsa-miR-338-3p	1820	918	3047	559	4429	1562	3806	829	4119	143	3722	896	-8.78647	-2.29853	21.7576	3.09369e-06	0.000105423	1.86485e-82	0	0	0	0	0	6	5-
hsa-miR-380*	7	45	26	33	4	99	26	79	14	71	6	551	-12.0309	2.76165	24.4968	7.44323e-07	3.19098e-05	4.03083e-09	0.734415	2.75956e-20	4.24399e-05	1.70274e-17	1.5443e-148	5	5+
hsa-miR-409-3p	21	101	55	72	22	393	74	188	37	415	29	3709	-10.3843	2.9299	27.941	1.25073e-07	7.22704e-06	2.27663e-15	1	2.31887e-73	4.4729e-08	6.7654e-125	0	5	5+
hsa-miR-410	56	216	130	77	27	386	110	239	42	224	17	1352	-10.9836	2.32592	18.0274	2.17747e-05	0.000452165	2.85587e-26	1.8481e-07	4.66122e-67	2.19647e-07	6.8127e-52	0	6	5+
hsa-miR-432	9	39	15	13	25	167	30	81	20	120	21	576	-11.9217	2.24003	18.0381	2.16532e-05	0.000452165	7.75164e-06	0.794502	5.40889e-21	0.000150433	1.79761e-29	6.00011e-127	5	5+
hsa-miR-451	1454763	28047	314021	136020	892218	89486	151132	9536	719349	196565	577265	162460	-3.56645	-2.93642	31.4655	2.03012e-08	1.49891e-06	0	0	0	0	0	0	6	6-
hsa-miR-486-5p	8462	243	5483	3249	20941	1421	4873	298	14316	2064	13529	2255	-7.6783	-3.26187	38.0125	7.02916e-10	1.16772e-07	0	7.00883e-278	0	0	0	0	6	5-
hsa-miR-486-3p	117	3	54	21	125	17	31	23	73	13	84	13	-12.5884	-2.45504	21.4541	3.62397e-06	0.000120406	9.92638e-39	3.54182e-06	1.79373e-19	0.233364	4.16396e-06	1.3079e-13	5	5-
hsa-miR-493	23	64	36	67	30	326	77	205	21	250	43	252	-11.7017	2.18707	18.8893	1.38529e-05	0.000323297	4.96138e-06	0.171585	6.61788e-54	3.43338e-10	2.02161e-76	6.65102e-33	5	5+
hsa-miR-495	37	105	87	124	37	594	87	274	60	332	45	1847	-10.7409	2.47657	22.2755	2.36197e-06	8.48395e-05	1.67197e-09	0.568008	1.05467e-107	6.08028e-17	7.76924e-78	0	5	5+
hsa-miR-584	57	0	54	33	144	30	226	46	130	22	146	25	-12.134	-2.36718	22.3014	2.33034e-06	8.48395e-05	1.09848e-13	0.000395237	4.03425e-20	4.58777e-33	3.93721e-10	4.06981e-23	6	5-
hsa-miR-877	40	282	13	91	18	111	29	129	18	111	30	36	-12.1695	2.22162	19.4251	1.04625e-05	0.000267397	1.90819e-51	1.17597e-12	7.03524e-14	2.62366e-12	7.21683e-28	0.995074	5	5+
hsa-miR-889	52	134	113	171	74	748	230	479	131	383	62	5494	-9.93675	2.11738	16.6484	4.49884e-05	0.000905903	1.55509e-10	0.199361	3.79662e-114	1.33118e-12	4.45252e-61	0	5	5+
hsa-miR-1246	9	20	9	609	16	86	15	455	18	17	22	57	-11.7699	2.55308	19.9295	8.03503e-06	0.000213571	0.0556676	7.8631e-156	9.10998e-10	2.25761e-100	0.373735	0.00183031	4	5+
hsa-miR-1269	0	171	0	797	0	351	0	29	2	0	0	2	-11.681	9.4812	91.0364	1.41055e-21	1.87462e-18	9.96311e-53	5.79421e-235	1.916e-94	1.15867e-06	0	0	6	3+
hsa-miR-4532	463	578	1730	370	1411	147	1266	163	1419	189	2140	356	-9.7054	-2.37201	22.1435	2.53007e-06	8.84858e-05	0.000189947	2.63857e-284	9.74272e-230	1.97371e-235	2.85143e-131	1.74090053418033e-312	6	5-
