# Supplementary material for: A High-Dimensional, Deep-Sequencing Study of Lung Adenocarcinoma in Female Never-Smokers
Source: PLoS One. 2013 Feb 6;8(2):e55596. doi: 10.1371/journal.pone.0055596 (PMC3566005; doi:10.1371/journal.pone.0055596)
Supplement: File S5 — List of DMR genes. (XLS) [file pone.0055596.s005.xls]

## Sheet: Sheet1
Type	Chr	Strand	Start	End	Gene Symbol	CpG island	Counts after TMM normalization												logConc	logFC	LR.statistic	p.value	FDR
							P1N	P1T	P3N	P3T	P4N	P4T	P5N	P5T	P6N	P6T	P8N	P8T
promoter	chr1	+	4713104	4715103	AJAP1	O	0	14	0	17	2	11	0	0	4	0	0	5	-12.1724	2.67578	17.1023	3.54198e-05	0.0141045
promoter	chr1	+	43230915	43232914	C1orf50	X	0	8	1	9	1	17	0	1	4	3	0	3	-12.3091	2.58797	15.4968	8.26455e-05	0.0222491
promoter	chr1	-	47695444	47697443	TAL1	X	11	44	18	83	22	36	3	1	10	34	10	19	-10.5296	1.42762	13.2004	0.000279893	0.0417959
promoter	chr1	-	50889142	50891141	DMRTA2	O	0	8	0	29	4	14	0	0	2	8	0	5	-11.914	3.17969	25.6241	4.14833e-07	0.00159454
promoter	chr1	+	53660100	53662099	CPT2	X	0	0	0	12	2	6	0	5	0	3	0	3	-12.6755	3.60137	17.5283	2.83061e-05	0.0120232
promoter	chr1	+	86932525	86934524	CLCA1	X	0	5	0	3	0	0	0	4	0	0	0	4	-13.3878	6.55859	16.4043	5.11689e-05	0.0177826
promoter	chr1	-	99470450	99472449	LPPR5	X	0	0	0	8	0	5	0	5	0	7	3	0	-12.8291	3.30104	14.4279	0.000145626	0.0315811
promoter	chr1	+	100433539	100435538	SLC35A3	X	8	5	8	0	12	0	3	2	10	0	8	3	-12.108	-2.13339	15.9256	6.58831e-05	0.0205532
promoter	chr1	+	145291370	145293369	NBPF10	X	0	14	0	3	0	1	0	0	0	7	0	0	-12.9386	6.90506	24.8877	6.07692e-07	0.00159454
promoter	chr1	+	151007028	151009027	BNIPL	X	33	2	30	10	13	8	11	8	16	4	22	8	-11.0695	-1.58655	15.2881	9.22954e-05	0.0241662
promoter	chr1	+	153745767	153747766	SLC27A3	X	8	23	4	22	3	13	3	1	2	3	0	15	-11.5911	1.83518	13.8214	0.000201034	0.0359119
promoter	chr1	+	155034212	155036211	EFNA4	X	0	15	2	18	2	13	0	1	7	3	4	7	-11.8774	1.96248	13.4136	0.000249811	0.0391481
promoter	chr1	-	157108178	157110383	ETV3	X	0	0	0	3	0	5	0	2	0	3	0	4	-13.3431	6.65355	16.6785	4.4281e-05	0.0161318
promoter	chr1	+	163036395	163041693	RGS4	X	0	6	0	7	0	6	0	0	3	6	0	4	-12.7023	3.28522	17.0197	3.69938e-05	0.0144306
promoter	chr1	+	168543710	168545709	XCL1	X	0	14	0	1	0	0	0	0	0	0	0	2	-13.314	6.28754	15.5044	8.2314e-05	0.0222491
promoter	chr1	-	179545085	179547084	NPHS2	X	0	0	0	6	0	3	0	0	0	3	0	5	-13.3458	6.33602	15.7824	7.10609e-05	0.0214812
promoter	chr1	-	197744624	197746623	DENND1B	X	0	0	4	0	4	0	2	0	0	0	2	0	-13.7007	-7.1098	18.129	2.06429e-05	0.0096236
promoter	chr1	-	202936405	202938404	CYB5R1	X	0	4	0	7	0	1	0	2	0	0	0	1	-13.4023	6.546	15.6445	7.64362e-05	0.0216462
promoter	chr1	+	207037153	207039152	IL20	X	0	1	0	5	0	4	0	0	0	1	0	2	-13.5289	6.32288	13.6038	0.000225733	0.0380827
promoter	chr1	-	207143971	207145970	FCAMR	X	0	4	0	1	0	3	0	2	0	0	0	2	-13.5853	6.58262	13.9617	0.000186577	0.0342906
promoter	chr1	-	230850337	230852336	AGT	X	0	12	0	6	2	3	1	0	2	11	3	7	-12.3298	2.26847	13.0643	0.000300984	0.0429328
promoter	chr2	-	11484712	11486711	ROCK2	X	0	8	0	5	0	7	0	0	0	5	0	4	-12.8281	7.15488	28.1748	1.10838e-07	0.000706186
promoter	chr2	+	105469968	105471967	POU3F3	X	4	7	0	25	2	5	1	9	5	8	5	14	-11.7352	1.92583	14.7223	0.000124562	0.0283437
promoter	chr2	+	149400559	149402558	EPC2	X	4	0	14	3	9	3	2	2	11	5	12	2	-12.0238	-1.89507	13.3094	0.000264075	0.0399553
promoter	chr2	-	167343482	167345481	SCN7A	X	2	0	2	0	9	3	7	0	6	0	5	3	-12.5997	-2.3683	13.3159	0.000263168	0.0399553
promoter	chr2	+	173290313	173292312	ITGA6	X	0	6	0	5	2	5	0	9	0	3	0	3	-12.6252	3.80879	21.2891	3.9497e-06	0.0039734
promoter	chr2	+	176992421	176994466	HOXD8	X	3	24	0	39	7	13	10	8	6	26	7	4	-11.2001	1.71912	15.1909	9.71685e-05	0.0246868
promoter	chr2	-	178483695	178485694	TTC30A	X	0	4	0	0	0	5	0	4	0	5	0	0	-13.3205	6.70675	18.6117	1.60236e-05	0.00805986
promoter	chr2	+	223160865	223162864	CCDC140	X	2	4	4	21	2	15	0	5	0	4	0	5	-12.032	2.59261	18.8662	1.40212e-05	0.00744449
promoter	chr2	-	237076653	237078652	GBX2	X	6	12	9	33	0	11	1	8	1	10	0	3	-11.645	2.29626	20.0057	7.72127e-06	0.00527087
promoter	chr3	-	44519163	44521162	ZNF445	X	0	2	0	1	0	8	0	0	0	5	0	2	-13.232	6.62864	18.7523	1.48843e-05	0.00768914
promoter	chr3	+	44594712	44596711	ZNF167	X	0	2	2	8	0	3	0	4	0	3	0	2	-12.981	3.30277	13.2995	0.000265477	0.0399553
promoter	chr3	+	71801200	71803199	GPR27	X	0	2	2	11	2	5	0	3	2	12	0	7	-12.2966	2.66371	17.2797	3.22623e-05	0.0133012
promoter	chr3	-	111314167	111316166	ZBED2	X	8	0	1	0	11	0	6	0	10	0	3	9	-12.3748	-2.53772	15.9031	6.66683e-05	0.0205532
promoter	chr3	+	113463865	113465864	ATP6V1A	X	4	0	19	1	11	4	1	0	0	0	6	3	-12.2754	-2.20781	13.0656	0.00030077	0.0429328
promoter	chr3	-	184079392	184081391	CLCN2	X	10	0	3	0	9	4	2	0	11	0	9	5	-12.2301	-2.45173	17.5856	2.74656e-05	0.0119313
promoter	chr4	-	8873544	8875543	HMX1	X	0	2	0	37	0	3	0	2	0	7	0	3	-12.2149	7.6498	36.9462	1.21433e-09	1.16053e-05
promoter	chr4	+	42893282	42895281	GRXCR1	X	1	3	0	5	0	2	0	0	0	5	0	3	-13.2247	3.97404	13.8312	0.000199987	0.0359119
promoter	chr4	+	89376267	89378266	HERC5	X	6	0	6	0	2	1	6	0	2	0	2	0	-12.9273	-3.94091	21.1136	4.3284e-06	0.00413665
promoter	chr4	+	119604573	119606572	METTL14	X	0	5	0	9	0	8	2	2	2	0	0	7	-12.5661	2.64621	13.5595	0.000231118	0.0380827
promoter	chr4	+	156127780	156129779	NPY2R	X	0	0	0	15	3	5	0	3	0	7	0	2	-12.6109	3.1428	15.1789	9.77903e-05	0.0246868
promoter	chr4	+	157995276	157997553	GLRB	X	8	6	0	11	0	14	0	7	0	10	0	3	-12.0782	2.92431	22.9316	1.67872e-06	0.00229193
promoter	chr4	-	174451379	174453378	HAND2	X	0	14	2	25	0	3	0	0	2	5	3	2	-12.1756	2.6811	15.9098	6.6435e-05	0.0205532
promoter	chr4	+	184018462	184020461	WWC2	X	10	22	0	23	0	18	3	1	6	8	2	12	-11.5302	2.21964	19.8689	8.29386e-06	0.00546651
promoter	chr4	-	187644988	187646987	FAT1	X	0	0	0	6	0	0	0	2	0	3	0	6	-13.3943	6.31869	15.1333	0.000100179	0.0248678
promoter	chr5	+	1799495	1801494	NDUFS6	X	0	14	0	3	0	1	0	2	0	0	0	5	-12.8876	6.97956	24.7746	6.44404e-07	0.00159454
promoter	chr5	+	2750261	2752260	C5orf38	X	0	3	4	21	2	8	0	7	2	2	0	5	-12.1632	2.30301	14.1402	0.000169675	0.0337758
promoter	chr5	+	15498304	15500303	FBXL7	X	0	1	12	0	0	0	0	0	4	0	4	0	-13.1817	-4.39354	15.7302	7.30501e-05	0.0214812
promoter	chr5	-	16179898	16181897	MARCH11	O	0	4	0	23	0	11	0	2	0	12	0	3	-12.1421	7.88694	45.802	1.30833e-11	2.50074e-07
promoter	chr5	-	27038690	27040689	CDH9	X	0	5	0	3	0	0	0	0	0	2	0	1	-13.7248	6.35241	12.8409	0.000339118	0.047661
promoter	chr5	+	34913819	34915818	BRIX1	X	0	8	0	5	2	5	0	5	0	12	0	0	-12.5217	4.07109	24.7071	6.67381e-07	0.00159454
promoter	chr5	-	37835594	37841782	GDNF	X	9	21	3	33	10	36	6	5	10	20	8	19	-11.0114	1.4962	13.3881	0.000253229	0.0393515
promoter	chr5	-	115152406	115154405	CDO1	O	0	7	0	14	0	6	2	0	0	5	0	2	-12.5615	3.78613	20.4104	6.24896e-06	0.00497678
promoter	chr5	-	138730886	138732885	LOC389333	X	13	20	1	17	0	14	0	5	5	8	4	5	-11.6545	1.87541	14.3472	0.000152007	0.0315811
promoter	chr5	+	140478233	140480232	PCDHB3	X	0	16	0	4	2	4	0	0	0	0	0	10	-12.5636	3.7654	19.0342	1.28396e-05	0.00721811
promoter	chr5	-	169407745	169409744	FAM196B	X	2	6	0	6	0	5	0	2	0	3	1	4	-12.8314	2.93827	13.5639	0.000230581	0.0380827
promoter	chr5	+	170734287	170736286	TLX3	X	3	8	0	42	5	7	0	0	4	20	3	17	-11.5206	2.56366	23.3668	1.33866e-06	0.00216109
promoter	chr5	+	179157850	179159849	MAML1	X	21	10	41	10	28	6	42	39	33	5	32	17	-10.5308	-1.41308	14.4063	0.000147311	0.0315811
promoter	chr6	+	29139310	29141309	OR2J2	X	4	2	4	3	4	0	15	0	4	0	7	0	-12.4337	-2.95859	20.7858	5.13615e-06	0.00467488
promoter	chr6	+	33587155	33589154	ITPR3	X	2	12	0	6	0	5	0	2	2	3	3	7	-12.4435	2.42922	13.6412	0.000221275	0.0377906
promoter	chr6	+	46759093	46761092	MEP1A	X	0	2	0	1	0	2	0	0	0	0	0	11	-13.3355	6.08242	14.3969	0.000148046	0.0315811
promoter	chr6	+	84560984	84562983	RIPPLY2	X	1	8	0	5	0	6	1	5	2	0	0	4	-12.6538	2.66206	13.4642	0.000243158	0.0390565
promoter	chr6	-	100911552	100913551	SIM1	X	0	8	0	18	0	10	0	3	0	0	4	3	-12.3035	3.53583	22.094	2.5962e-06	0.00295093
promoter	chr6	+	101844860	101846859	GRIK2	X	0	1	0	6	0	0	0	2	0	4	0	2	-13.5128	6.51284	14.8387	0.000117107	0.0276343
promoter	chr6	+	132871831	132873830	TAAR8	X	0	6	0	2	0	5	0	0	0	5	0	0	-13.2712	6.72255	19.2743	1.13221e-05	0.0065579
promoter	chr6	-	138428661	138430660	PERP	X	6	0	0	0	4	0	0	0	2	0	0	0	-13.7115	-6.45128	13.9976	0.000183048	0.0342906
promoter	chr7	-	15726309	15728308	MEOX2	X	1	12	2	26	0	14	5	2	0	0	0	3	-11.9852	2.67788	18.3583	1.83018e-05	0.00896976
promoter	chr7	-	35293712	35295711	TBX20	X	0	4	0	14	0	5	2	2	1	2	0	5	-12.5714	3.0846	16.0504	6.1677e-05	0.0200084
promoter	chr7	-	87105020	87107019	ABCB4	X	4	10	0	1	0	7	0	0	1	7	0	3	-12.6292	2.66906	13.4131	0.000249873	0.0391481
promoter	chr7	+	96633289	96635288	DLX6	X	0	5	0	2	0	8	0	2	0	3	0	0	-13.1429	6.7643	20.5942	5.67665e-06	0.00493198
promoter	chr8	-	26371484	26373483	PNMA2	X	0	2	0	0	0	5	0	0	0	3	0	5	-13.5119	6.26223	14.3202	0.000154205	0.0316932
promoter	chr8	-	72268980	72276467	EYA1	X	2	8	0	7	0	0	0	2	0	7	0	0	-12.9494	3.58632	15.0424	0.000105124	0.0254346
promoter	chr8	+	82190717	82192716	FABP5	X	8	4	0	3	0	6	0	6	0	10	0	3	-12.4569	2.35882	13.1191	0.000292298	0.0428751
promoter	chr8	-	82607208	82609207	SLC10A5	X	0	2	0	2	0	1	0	3	1	9	0	0	-13.2513	4.19534	14.2263	0.000162087	0.0326367
promoter	chr8	+	85093452	85097098	RALYL	X	11	26	5	48	16	17	0	8	13	23	8	20	-10.9192	1.49031	13.4989	0.000238706	0.0386664
promoter	chr8	+	125461047	125463046	TRMT12	X	0	1	0	3	0	3	0	2	0	0	0	3	-13.5945	6.4179	12.933	0.000322836	0.0457089
promoter	chr8	-	133772915	133774914	TMEM71	X	0	8	0	1	0	5	0	2	0	0	3	9	-12.8248	3.49841	15.4215	8.60057e-05	0.0228321
promoter	chr8	-	134584184	134586183	ST3GAL1	X	0	1	4	10	1	10	0	2	0	3	0	7	-12.5198	2.55478	12.8254	0.00034194	0.0477069
promoter	chr8	-	145754459	145756458	C8orf82	X	7	45	19	103	21	40	10	11	22	48	12	19	-10.3346	1.42068	14.6728	0.000127877	0.0287557
promoter	chr10	-	27529809	27533068	ACBD5	X	4	2	13	1	4	0	7	2	2	0	3	2	-12.5436	-2.25759	12.7425	0.000357437	0.0495076
promoter	chr10	-	95360994	95362993	RBP4	X	2	8	0	3	0	0	0	0	0	8	0	4	-12.9762	3.58099	14.775	0.000121128	0.0282346
promoter	chr10	+	116851123	116853122	ATRNL1	X	1	6	1	6	2	10	0	6	0	2	1	3	-12.4866	2.54625	14.0828	0.00017494	0.0337758
promoter	chr10	+	118348489	118350488	PNLIPRP1	X	0	3	0	7	0	3	0	0	0	0	0	3	-13.3513	6.22091	15.6027	7.81409e-05	0.0216462
promoter	chr10	+	124893566	124895565	HMX3	O	0	3	0	12	0	0	0	0	0	7	0	4	-12.9329	6.76477	23.6858	1.13418e-06	0.00216109
promoter	chr11	-	3400449	3402448	ZNF195	X	4	12	0	16	5	11	3	18	7	13	0	11	-11.5985	2.27582	22.0731	2.62456e-06	0.00295093
promoter	chr11	+	17739109	17741108	MYOD1	X	0	3	0	8	2	2	0	0	0	5	0	7	-12.8297	3.3715	15.1718	9.81583e-05	0.0246868
promoter	chr11	+	20618945	20620944	SLC6A5	O	0	25	4	17	7	9	0	1	0	8	5	15	-11.6613	2.27232	19.283	1.12707e-05	0.0065579
promoter	chr11	-	32452364	32459081	WT1	X	9	24	8	84	7	31	3	10	7	22	13	36	-10.6885	2.00457	24.7593	6.49542e-07	0.00159454
promoter	chr11	+	60679370	60681369	TMEM109	X	14	20	6	24	3	11	0	7	5	17	8	17	-11.3173	1.63904	14.0067	0.000182165	0.0342906
promoter	chr11	-	61100667	61102666	DDB1	X	8	14	4	18	3	13	0	0	0	8	0	5	-11.8846	1.977	13.1092	0.000293849	0.0428751
promoter	chr11	-	75141675	75143674	KLHL35	X	6	15	2	26	17	15	0	12	2	13	3	3	-11.4305	1.68054	13.093	0.000296397	0.0429192
promoter	chr11	+	98889870	98891869	CNTN5	X	2	2	0	3	2	6	0	3	0	5	0	10	-12.6203	2.70925	14.0511	0.000177908	0.0340053
promoter	chr11	+	108091558	108093557	ATM	X	0	3	0	5	0	1	0	0	0	0	0	4	-13.5236	6.31038	13.6398	0.000221437	0.0377906
promoter	chr12	+	13195314	13197313	KIAA1467	X	6	0	0	0	2	0	2	0	0	0	1	0	-13.7982	-6.49239	13.8687	0.000196037	0.0356862
promoter	chr12	-	43945725	43947724	ADAMTS20	X	2	12	0	13	2	14	2	8	7	3	0	9	-11.89	2.18137	16.9671	3.80336e-05	0.0144937
promoter	chr12	-	46384402	46386401	SCAF11	X	0	8	0	5	1	6	2	5	0	4	1	2	-12.6162	2.73932	14.6393	0.000130169	0.0289309
promoter	chr12	+	85672035	85674034	ALX1	X	2	26	0	45	5	9	3	3	6	11	3	3	-11.4597	2.21285	18.9617	1.33366e-05	0.00728329
promoter	chr12	+	101869334	101871333	SPIC	X	0	2	0	2	0	1	0	2	0	2	0	4	-13.6475	7.07599	13.9719	0.000185559	0.0342906
promoter	chr14	-	24701577	24703576	NEDD8	X	0	2	0	1	0	8	0	0	0	3	0	3	-13.3419	6.50352	16.6238	4.55749e-05	0.0161318
promoter	chr14	-	24701577	24703576	NEDD8-MDP1	X	0	2	0	1	0	8	0	0	0	3	0	3	-13.3419	6.50352	16.6238	4.55749e-05	0.0161318
promoter	chr14	-	57272346	57279184	OTX2	O	6	39	9	82	13	30	3	14	11	17	6	18	-10.6902	1.97193	23.6186	1.17448e-06	0.00216109
promoter	chr14	-	60632212	60634211	DHRS7	X	2	6	0	12	0	12	0	0	1	3	3	7	-12.3494	2.70802	16.0479	6.17607e-05	0.0200084
promoter	chr14	-	64970555	64972554	ZBTB25	X	2	0	6	0	2	0	0	0	0	0	2	0	-13.7042	-7.37457	17.2537	3.27066e-05	0.0133012
promoter	chr14	+	71372121	71374120	PCNX	X	2	18	0	10	0	3	0	2	0	5	5	3	-12.3072	2.66803	16.3268	5.33044e-05	0.0181939
promoter	chr14	+	85994487	85996486	FLRT2	X	1	4	0	19	0	5	2	2	0	5	0	7	-12.313	3.53576	23.1871	1.46982e-06	0.00216109
promoter	chr14	+	93797564	93799563	KIAA1409	X	4	8	0	15	0	9	7	16	7	18	5	5	-11.648	1.75724	13.6453	0.000220792	0.0377906
promoter	chr14	-	93799386	93801385	BTBD7	X	1	0	0	5	0	12	0	7	0	3	0	5	-12.622	4.67638	23.2018	1.45863e-06	0.00216109
promoter	chr15	+	60294420	60296419	FOXB1	X	0	17	9	16	5	14	5	9	2	15	3	12	-11.5224	1.94528	17.6797	2.61404e-05	0.0118964
promoter	chr16	-	420570	422569	MRPL28	X	4	20	5	20	11	20	0	8	9	29	8	7	-11.2385	1.61352	14.0906	0.000174208	0.0337758
promoter	chr16	+	8889669	8891668	PMM2	X	6	16	0	19	0	10	2	0	2	24	3	6	-11.6988	2.49698	21.57	3.41147e-06	0.0036226
promoter	chr16	-	30107522	30109537	YPEL3	X	1	25	8	16	4	17	0	5	8	9	5	10	-11.5114	1.76738	14.3616	0.000150844	0.0315811
promoter	chr16	+	30933895	30935894	FBXL19	X	6	2	19	4	15	0	2	0	9	0	11	8	-11.8676	-2.35937	20.0974	7.35964e-06	0.00527087
promoter	chr16	-	52580807	52583714	TOX3	X	2	10	5	12	5	14	5	7	7	11	0	21	-11.608	1.71918	13.5638	0.000230587	0.0380827
promoter	chr16	+	56714381	56716380	MT1X	X	0	2	0	0	0	7	0	0	0	5	0	0	-13.5764	6.04888	13.5377	0.000233822	0.0381989
promoter	chr16	-	66952888	66954887	CDH16	X	0	10	0	2	1	6	0	0	0	0	0	5	-12.8998	4.34928	17.6298	2.68344e-05	0.0119282
promoter	chr16	+	86598856	86600855	FOXC2	X	4	10	0	13	0	8	0	8	2	9	5	3	-12.0325	2.27999	16.9355	3.86722e-05	0.0144937
promoter	chr17	-	2304259	2306258	MNT	X	0	4	0	7	1	3	0	0	0	7	0	3	-12.9619	4.42465	18.1704	2.01995e-05	0.0096236
promoter	chr17	-	27230090	27232089	DHRS13	X	19	2	22	9	22	5	18	16	19	9	37	13	-10.9322	-1.44793	13.7711	0.000206485	0.036544
promoter	chr17	+	32644065	32646064	CCL8	X	0	4	0	2	0	3	0	0	0	0	0	6	-13.3955	6.37097	15.6071	7.79633e-05	0.0216462
promoter	chr17	-	43568147	43570146	PLEKHM1	X	0	4	0	2	0	0	0	2	0	2	0	2	-13.7214	6.78619	13.3634	0.000256578	0.0395503
promoter	chr17	-	46655744	46657743	HOXB4	X	0	19	1	9	2	18	0	3	3	10	5	4	-11.8532	2.47597	20.47	6.05743e-06	0.00497678
promoter	chr17	-	46682335	46684334	HOXB6	X	33	28	2	33	32	74	6	18	16	51	9	29	-10.3989	1.52982	16.2173	5.64752e-05	0.018938
promoter	chr19	+	18262015	18264014	PIK3R2	X	14	0	6	1	15	7	2	0	2	0	5	2	-12.1912	-2.31783	15.7508	7.22565e-05	0.0214812
promoter	chr19	+	18745837	18747836	KLHL26	X	20	11	59	21	52	33	11	1	60	13	78	40	-10.1856	-1.38511	14.3839	0.000149068	0.0315811
promoter	chr19	+	30015490	30017489	VSTM2B	X	4	23	0	24	1	1	0	2	0	0	0	5	-12.0569	3.39854	22.3912	2.22393e-06	0.00283389
promoter	chr19	-	37263717	37265716	ZNF850	X	2	7	1	20	0	16	0	2	1	2	6	3	-12.0584	2.14647	13.1469	0.000287996	0.0426726
promoter	chr19	-	57678857	57680856	DUXA	X	0	4	0	5	0	2	0	0	0	3	0	0	-13.5826	6.37833	14.0867	0.000174571	0.0337758
promoter	chr20	+	20346764	20348763	INSM1	X	0	8	0	19	0	6	0	2	0	5	5	2	-12.323	3.10615	19.3313	1.09888e-05	0.0065579
promoter	chr20	-	21378048	21380047	NKX2-4	O	0	4	0	10	2	2	0	3	0	5	0	6	-12.6524	3.70908	20.0231	7.65112e-06	0.00527087
promoter	chr20	+	37207837	37209836	ADIG	X	0	7	0	7	2	12	0	2	2	3	0	7	-12.4028	3.0898	19.3329	1.09801e-05	0.0065579
promoter	chr20	-	49575061	49577060	DPM1	X	2	22	0	6	0	1	0	0	2	6	3	3	-12.3524	2.59061	13.7354	0.000210452	0.0369044
promoter	chr21	-	27107966	27109965	ATP5J	X	0	2	0	2	0	0	0	4	0	5	0	0	-13.6394	6.54136	14.2249	0.00016221	0.0326367
promoter	chr21	+	34440449	34442448	OLIG1	X	0	0	0	3	1	10	0	0	0	3	0	6	-12.9882	4.11605	14.7399	0.000123409	0.0283437
promoter	chr21	-	46012387	46014386	KRTAP10-6	X	10	18	0	35	5	15	0	8	6	20	8	10	-11.2893	2.01441	20.0913	7.38301e-06	0.00527087
promoter	chrX	+	46304623	46306622	ZNF673	X	0	6	3	11	0	2	0	2	0	3	0	4	-12.7133	3.17865	15.6963	7.43695e-05	0.0215378
promoter	chrX	-	47479257	47481256	SYN1	X	4	43	18	53	33	32	3	5	15	33	13	42	-10.5258	1.41513	13.4304	0.000247576	0.0391481
promoter	chrX	-	111923376	111925375	LHFPL1	X	0	10	0	3	0	3	0	0	0	3	3	5	-12.8833	3.43013	14.96	0.000109813	0.0262372
promoter	chrX	+	136646345	136648344	ZIC3	X	18	37	20	57	18	32	5	16	42	88	13	65	-10.1743	1.39807	15.1003	0.000101947	0.0249823
5' UTR	chr1	-	1310138	1310562	AURKAIP1	X	0	0	8	0	0	0	0	0	0	0	1	0	-14.7084	-5.70048	13.4772	0.000241474	0.0324251
5' UTR	chr1	-	1310138	1310580	AURKAIP1	X	0	0	8	0	0	0	0	0	0	0	1	0	-14.7084	-5.70048	13.4772	0.000241474	0.0324251
5' UTR	chr1	-	3663335	3663337	TP73-AS1	X	0	3	0	1	0	1	0	0	0	7	0	0	-14.423	6.00025	14.4829	0.000141435	0.0256031
5' UTR	chr1	+	11714432	11715891	FBXO44	X	0	1	0	1	0	3	1	0	0	7	0	3	-14.0792	3.74282	12.2491	0.000465487	0.0464593
5' UTR	chr1	+	34642553	34643389	C1orf94	X	1	6	2	26	2	6	0	0	0	5	4	3	-12.8196	2.18257	16.411	5.09891e-05	0.01563
5' UTR	chr1	-	50887210	50889141	DMRTA2	O	6	17	13	30	5	30	0	2	5	18	6	16	-11.8909	1.73055	24.7067	6.67512e-07	0.00119019
5' UTR	chr1	+	55464617	55464858	BSND	X	4	7	0	11	0	2	1	2	0	0	1	8	-13.2198	2.15378	12.3691	0.000436496	0.0446519
5' UTR	chr1	+	67632169	67633802	IL23R	X	12	2	21	6	21	13	33	13	13	16	10	3	-11.8001	-1.15032	13.8794	0.00019492	0.0298846
5' UTR	chr1	+	95286100	95290056	SLC44A3	X	0	4	0	10	0	1	0	6	4	10	0	11	-13.0319	3.27564	27.4855	1.58276e-07	0.000343821
5' UTR	chr1	-	109968954	109969070	PSMA5	X	0	0	6	0	0	0	0	0	0	0	5	0	-14.601	-6.01173	15.7102	7.38267e-05	0.0185283
5' UTR	chr1	-	151137736	151138370	LYSMD1	X	16	4	17	1	13	8	0	0	4	2	5	5	-12.5744	-1.52144	13.1855	0.000282118	0.0332668
5' UTR	chr1	+	152956564	152957705	SPRR1A	X	0	13	0	5	0	4	0	0	2	0	0	1	-13.5916	3.35314	16.3278	5.32763e-05	0.01563
5' UTR	chr1	-	165324798	165325478	LMX1A	X	0	10	0	14	4	4	0	1	2	0	0	2	-13.197	2.12294	12.2035	0.000477009	0.0471297
5' UTR	chr1	+	171308035	171310462	TOP1P1	X	0	6	0	0	0	1	0	0	0	5	0	0	-14.4234	5.89109	14.3004	0.000155836	0.0270181
5' UTR	chr1	+	179560748	179561749	TDRD5	X	7	0	0	19	2	6	0	4	0	8	3	10	-12.7826	1.78681	13.4345	0.000247033	0.0324251
5' UTR	chr1	+	179560757	179561749	TDRD5	X	7	0	0	19	2	6	0	4	0	8	3	10	-12.7826	1.78681	13.4345	0.000247033	0.0324251
5' UTR	chr1	+	179560989	179561749	TDRD5	X	7	0	0	17	2	6	0	4	0	8	3	10	-12.8276	1.72957	12.4456	0.000418968	0.0435428
5' UTR	chr1	+	181452686	181452879	CACNA1E	X	2	12	1	10	2	4	1	0	0	10	1	0	-13.1338	2.09698	13.2734	0.000269203	0.033057
5' UTR	chr1	+	212797789	212798218	FAM71A	X	3	2	2	12	0	8	0	0	0	8	0	1	-13.2429	2.4003	14.4544	0.000143591	0.0257412
5' UTR	chr1	-	228602775	228604583	TRIM17	X	19	50	52	130	59	71	20	58	72	95	38	45	-10.3189	0.806844	12.5689	0.000392216	0.0422278
5' UTR	chr1	-	235490236	235491532	ARID4B	X	1	0	4	0	2	0	0	0	4	0	4	2	-14.13	-3.22712	12.4959	0.000407851	0.0431563
5' UTR	chr1	+	245133171	245133719	EFCAB2	X	4	2	6	0	6	0	0	0	0	0	2	0	-13.9058	-3.58272	17.4295	2.98162e-05	0.0124317
5' UTR	chr2	+	26624784	26624856	CCDC164	X	0	4	0	8	0	0	0	1	0	0	0	0	-14.2169	5.33514	13.9561	0.000187134	0.0294072
5' UTR	chr2	-	38302533	38303323	CYP1B1	X	0	6	0	6	0	6	0	0	0	0	3	4	-13.5976	3.22865	14.906	0.000113006	0.0241224
5' UTR	chr2	-	65357051	65357435	RAB1A	X	2	0	6	1	0	1	0	0	2	0	6	0	-14.0704	-3.31368	13.7248	0.000211641	0.0306498
5' UTR	chr2	+	71205575	71205774	ANKRD53	X	5	0	2	0	0	0	0	0	3	0	2	0	-14.4207	-6.45733	16.3784	5.1872e-05	0.01563
5' UTR	chr2	-	75426062	75426645	TACR1	X	0	2	0	8	0	0	0	2	0	0	0	2	-14.1537	5.58599	14.7669	0.000121652	0.0243499
5' UTR	chr2	+	85811531	85811612	VAMP5	X	0	3	0	6	0	1	0	0	0	4	0	0	-14.2115	5.97149	15.8662	6.79812e-05	0.0179718
5' UTR	chr2	+	96991069	96992392	ITPRIPL1	X	2	12	1	9	0	7	0	4	2	3	4	5	-12.9596	2.14142	16.3348	5.30804e-05	0.01563
5' UTR	chr2	-	114035973	114036498	PAX8	X	15	21	9	40	9	24	2	16	6	9	13	13	-11.7154	1.17249	14.048	0.0001782	0.0286824
5' UTR	chr2	+	124782864	124783226	CNTNAP5	X	2	6	0	12	2	4	0	1	2	3	0	3	-13.2437	2.10367	12.0697	0.000512491	0.0491818
5' UTR	chr2	+	201676269	201677939	BZW1	X	1	4	13	1	4	4	11	0	7	0	7	2	-12.9264	-1.86583	15.7164	7.35849e-05	0.0185283
5' UTR	chr2	-	208633465	208634143	FZD5	X	0	4	0	1	0	5	0	0	0	0	0	4	-14.1501	5.98728	15.8604	6.81922e-05	0.0179718
5' UTR	chr2	-	223163336	223163715	PAX3	X	2	9	0	6	0	1	0	0	0	3	0	0	-13.7854	3.13694	13.1811	0.000282785	0.0332668
5' UTR	chr3	+	9791628	9791969	OGG1	X	2	0	8	0	0	0	0	0	0	0	0	0	-14.6041	-6.23691	14.6831	0.000127181	0.0243499
5' UTR	chr3	+	12525931	12531298	TSEN2	X	4	4	0	6	9	12	0	2	0	17	3	9	-12.6997	1.67489	13.3584	0.000257265	0.0324251
5' UTR	chr3	+	12526010	12531298	TSEN2	X	4	4	0	6	9	12	0	2	0	17	3	9	-12.6997	1.67489	13.3584	0.000257265	0.0324251
5' UTR	chr3	+	19190017	19190210	KCNH8	X	0	8	0	3	0	1	0	0	0	0	0	4	-14.0298	5.96946	18.5277	1.67453e-05	0.00936952
5' UTR	chr3	+	39371197	39373821	CCR8	X	16	4	21	9	18	4	16	21	13	6	23	7	-11.8298	-1.1685	14.4101	0.000147015	0.0261014
5' UTR	chr3	-	42845685	42845934	HIGD1A	X	4	1	3	0	8	4	0	0	11	0	5	3	-13.2378	-1.92334	12.0471	0.000518719	0.0496263
5' UTR	chr3	-	105586423	105587887	CBLB	X	0	4	0	4	0	2	0	0	0	0	0	2	-14.2834	5.98373	14.116	0.000171875	0.0286758
5' UTR	chr3	+	147127181	147127898	ZIC1	X	1	11	5	17	5	29	2	5	12	7	7	15	-12.1361	1.48561	16.3035	5.39643e-05	0.01563
5' UTR	chr3	-	170625597	170626426	EIF5A2	X	1	6	0	2	0	10	0	0	3	4	0	6	-13.37	2.64512	15.2439	9.44802e-05	0.0212748
5' UTR	chr3	-	187419918	187420345	RTP2	X	13	2	15	2	0	0	0	0	0	0	0	1	-13.4109	-2.46222	13.1676	0.000284829	0.0332668
5' UTR	chr3	+	190105661	190105907	CLDN16	X	1	2	0	9	0	3	0	0	0	0	0	4	-13.8411	3.72521	13.6207	0.000223711	0.0312933
5' UTR	chr3	-	194119013	194119995	GP5	X	0	6	0	6	0	5	0	0	2	3	1	2	-13.6283	2.64189	12.1635	0.000487344	0.0478647
5' UTR	chr4	+	6675821	6677773	LOC93622	X	2	8	0	18	0	11	3	6	2	5	5	3	-12.7075	2.09552	18.9466	1.34429e-05	0.00853602
5' UTR	chr4	-	54424134	54424436	LNX1	X	0	14	2	8	0	6	0	1	1	0	3	2	-13.2393	2.38104	14.1289	0.000170699	0.0286534
5' UTR	chr4	-	57522168	57522688	HOPX	X	0	11	0	5	1	0	0	0	1	13	0	1	-13.4401	3.79586	22.5789	2.0169e-06	0.0027586
5' UTR	chr4	+	95128759	95129544	SMARCAD1	X	0	0	0	0	8	0	0	0	0	0	2	0	-14.6012	-6.33863	15.4832	8.32436e-05	0.0192131
5' UTR	chr4	+	109541722	109543114	RPL34	X	0	0	0	4	0	0	0	0	0	7	0	2	-14.3472	5.67702	13.9817	0.000184595	0.0291321
5' UTR	chr4	+	109541749	109543114	RPL34	X	0	0	0	4	0	0	0	0	0	7	0	2	-14.3472	5.67702	13.9817	0.000184595	0.0291321
5' UTR	chr4	+	110736666	110737319	GAR1	X	1	0	13	1	12	0	0	0	1	0	3	0	-13.5306	-4.31224	29.5166	5.54412e-08	0.000186126
5' UTR	chr4	-	122683040	122686340	TMEM155	X	0	14	9	34	11	20	5	2	7	13	8	17	-11.9446	1.28911	14.1597	0.000167929	0.0283171
5' UTR	chr5	-	850719	851101	ZDHHC11	X	5	5	1	16	1	4	0	4	0	5	0	5	-12.9867	2.33047	17.6639	2.63575e-05	0.012167
5' UTR	chr5	+	33936491	33936844	RXFP3	O	1	1	0	12	0	3	1	0	0	8	0	1	-13.5583	3.36469	16.4443	5.00998e-05	0.01563
5' UTR	chr5	-	37834900	37839782	GDNF	X	14	17	3	31	16	34	5	3	5	13	6	16	-11.7915	1.21844	14.0434	0.000178639	0.0286824
5' UTR	chr5	+	42756920	42759222	CCDC152	X	12	32	5	10	3	10	3	2	0	8	3	7	-12.3316	1.48455	13.6225	0.000223486	0.0312933
5' UTR	chr5	-	52403006	52405325	MOCS2	X	0	5	0	3	1	2	0	7	1	4	1	3	-13.5843	2.75984	13.879	0.00019496	0.0298846
5' UTR	chr5	+	63986135	63986449	FAM159B	X	0	0	0	1	0	10	0	1	0	0	0	5	-13.8864	5.61651	17.996	2.21372e-05	0.010707
5' UTR	chr5	-	75919057	75919240	F2RL2	X	0	8	0	0	0	2	0	4	0	0	0	0	-14.2069	5.6741	16.0029	6.32468e-05	0.0170286
5' UTR	chr5	-	112630084	112630612	MCC	X	0	2	0	2	0	7	0	0	0	0	0	2	-14.2177	5.55515	13.8997	0.000192825	0.0298846
5' UTR	chr5	-	115152096	115152405	CDO1	O	0	5	0	5	0	1	0	0	0	5	0	2	-14.026	6.46844	20.067	7.47755e-06	0.00778183
5' UTR	chr5	-	121413682	121414055	LOX	X	0	3	0	4	0	2	0	0	0	0	0	2	-14.3576	5.8343	12.9118	0.000326521	0.0372163
5' UTR	chr5	-	134724785	134734928	H2AFY	X	2	38	3	14	17	25	1	5	11	13	17	29	-11.7252	1.36791	18.0989	2.0972e-05	0.0106092
5' UTR	chr5	-	134724785	134735577	H2AFY	X	2	40	3	17	20	26	1	5	16	14	22	30	-11.6198	1.19372	14.8435	0.000116809	0.0243499
5' UTR	chr5	+	140535580	140537989	PCDHB17	X	18	24	2	20	2	17	0	0	7	8	0	12	-12.1582	1.57757	17.0395	3.66104e-05	0.0129999
5' UTR	chr5	+	140613938	140617100	PCDHB18	X	8	11	3	23	5	10	3	9	4	14	8	6	-12.243	1.29366	12.2877	0.000455943	0.0458788
5' UTR	chr5	-	142779401	142783254	NR3C1	X	0	0	0	3	0	1	0	0	0	7	0	5	-14.0246	6.10284	18.8556	1.41e-05	0.00853602
5' UTR	chr5	-	142779416	142783254	NR3C1	X	0	0	0	3	0	1	0	0	0	7	0	5	-14.0246	6.10284	18.8556	1.41e-05	0.00853602
5' UTR	chr5	-	142779461	142783254	NR3C1	X	0	0	0	3	0	1	0	0	0	7	0	5	-14.0246	6.10284	18.8556	1.41e-05	0.00853602
5' UTR	chr5	-	142780406	142784045	NR3C1	X	0	0	0	3	0	3	0	0	0	0	0	6	-14.2855	5.53619	12.3531	0.000440264	0.0447056
5' UTR	chr5	-	153857570	153857824	HAND1	X	0	4	0	0	0	1	0	4	0	0	0	2	-14.4303	5.95973	12.9804	0.000314772	0.0363257
5' UTR	chr5	-	159738932	159739573	CCNJL	X	0	4	0	0	0	1	0	6	0	0	0	0	-14.4298	5.57703	12.7013	0.000365396	0.0400407
5' UTR	chr5	+	172386439	172386875	RPL26L1	X	0	10	2	13	0	3	2	0	0	0	0	2	-13.3496	2.53455	13.4599	0.000243717	0.0324251
5' UTR	chr5	-	176827579	176827637	PFN3	X	4	6	1	19	0	5	3	7	3	8	3	3	-12.7601	1.75998	13.8705	0.000195852	0.0298846
5' UTR	chr5	+	176873796	176882067	PRR7	X	35	18	9	50	13	42	5	13	18	34	25	54	-11.1149	1.02315	14.5288	0.000138035	0.0254672
5' UTR	chr5	+	176875326	176882067	PRR7	X	35	18	9	51	14	44	6	13	17	34	25	53	-11.1288	1.02172	14.4289	0.000145552	0.0259666
5' UTR	chr6	+	12012724	12015860	HIVEP1	X	0	2	0	6	2	5	0	0	0	8	0	1	-13.6995	3.23367	14.4627	0.00014296	0.0257412
5' UTR	chr6	-	29012952	29012954	OR2W1	X	8	0	5	1	5	1	2	0	2	0	3	1	-13.5384	-2.66236	16.5909	4.6373e-05	0.0151872
5' UTR	chr6	-	33748879	33754719	LEMD2	X	17	35	16	64	14	51	6	1	20	31	14	18	-11.2413	1.09916	15.2825	9.25706e-05	0.0210426
5' UTR	chr6	+	37137922	37138350	PIM1	X	0	0	0	0	4	0	0	0	0	0	4	0	-14.8248	-6.05001	12.8074	0.000345255	0.0387535
5' UTR	chr6	-	84417648	84419127	SNAP91	X	4	2	4	23	0	13	0	2	2	0	0	4	-12.8134	1.827	12.387	0.000432343	0.04435
5' UTR	chr6	+	101846861	101847152	GRIK2	X	0	2	0	10	0	0	0	1	0	4	0	0	-14.0338	5.62803	17.3991	3.02975e-05	0.0124317
5' UTR	chr6	-	105581454	105584221	BVES	X	0	4	0	1	0	1	0	0	0	2	0	2	-14.4299	6.35116	13.6838	0.000216311	0.0309618
5' UTR	chr6	-	105581454	105584543	BVES	X	0	4	0	1	0	1	0	0	0	2	0	2	-14.4299	6.35116	13.6838	0.000216311	0.0309618
5' UTR	chr6	-	105581454	105585049	BVES	X	0	4	0	1	0	1	0	0	0	2	0	2	-14.4299	6.35116	13.6838	0.000216311	0.0309618
5' UTR	chr6	-	109703583	109703762	CD164	X	0	0	0	0	6	0	2	0	2	0	0	0	-14.6019	-6.10093	14.6529	0.000129237	0.0243499
5' UTR	chr6	-	111887756	111888521	TRAF3IP2	X	8	3	0	19	0	7	0	0	0	3	0	4	-13.0346	1.98353	12.3923	0.000431099	0.0443456
5' UTR	chr6	-	146127543	146135921	FBXO30	X	0	12	2	15	9	17	9	9	9	17	6	8	-12.1536	1.25538	12.5442	0.00039743	0.0425412
5' UTR	chr7	-	751144	752161	PRKAR1B	X	7	4	8	23	2	20	2	8	7	21	6	3	-12.1907	1.29465	12.274	0.000459315	0.0460925
5' UTR	chr7	-	751144	752577	PRKAR1B	X	7	7	8	27	2	23	2	8	8	23	6	3	-12.072	1.46795	16.6014	4.61162e-05	0.0151872
5' UTR	chr7	-	7572508	7575460	COL28A1	X	0	0	0	1	0	12	0	0	0	0	0	3	-13.9874	5.24509	15.2762	9.28794e-05	0.0210426
5' UTR	chr7	+	16566505	16566576	LOC100506049	X	1	5	2	9	1	10	0	1	3	6	0	2	-13.1456	2.06943	12.9462	0.000320567	0.0368104
5' UTR	chr7	+	24323807	24324858	NPY	X	2	2	2	13	2	10	0	4	0	4	0	3	-13.0893	2.31936	15.6419	7.65395e-05	0.0185809
5' UTR	chr7	-	27196166	27196296	HOXA7	X	0	2	0	8	0	5	0	0	0	4	0	0	-13.8834	5.96808	20.3495	6.45114e-06	0.00700689
5' UTR	chr7	+	27282164	27282648	EVX1	X	0	8	0	19	0	2	0	0	1	5	1	2	-13.1988	3.84795	25.4667	4.50087e-07	0.000923404
5' UTR	chr7	-	35293233	35293711	TBX20	X	0	5	0	13	0	1	1	0	0	3	0	1	-13.672	4.17866	17.9637	2.25164e-05	0.010707
5' UTR	chr7	-	36763755	36764154	AOAH	X	0	10	0	9	1	11	0	2	4	4	4	5	-12.9248	2.18768	17.2484	3.27979e-05	0.0124865
5' UTR	chr7	+	86974951	86978383	CROT	X	0	2	0	1	0	10	0	0	0	0	0	0	-14.1555	5.23916	13.631	0.000222483	0.0312933
5' UTR	chr7	-	128000047	128001739	PRRT4	X	23	15	24	17	69	35	48	32	49	23	64	31	-10.8169	-0.850347	12.3514	0.000440652	0.0447056
5' UTR	chr8	-	37823989	37824184	ADRB3	X	0	2	0	4	0	5	0	0	0	1	0	3	-14.0921	6.16085	16.8225	4.10438e-05	0.0142991
5' UTR	chr8	-	49647712	49647870	EFCAB1	X	0	2	0	4	0	0	0	0	0	2	0	3	-14.4323	5.93241	12.6395	0.000377681	0.0411427
5' UTR	chr8	+	65285775	65291385	LOC100130155	X	16	20	20	73	27	57	5	19	9	16	18	25	-11.1357	1.0755	15.5498	8.0362e-05	0.0186647
5' UTR	chr8	+	65289884	65291385	LOC100130155	X	2	12	5	28	11	24	0	5	5	13	10	11	-12.0425	1.53418	18.4211	1.77084e-05	0.0097605
5' UTR	chr8	-	67874002	67874825	TCF24	X	0	2	0	12	0	0	0	2	0	0	0	2	-13.9355	5.60162	17.4908	2.88695e-05	0.0124317
5' UTR	chr8	-	72267142	72268979	EYA1	X	0	4	0	0	0	1	0	0	0	6	0	0	-14.6035	5.83832	12.4317	0.000422116	0.0435428
5' UTR	chr8	-	72267142	72274467	EYA1	X	2	10	0	3	0	1	0	2	0	8	0	0	-13.6509	3.52106	18.0196	2.18641e-05	0.010707
5' UTR	chr8	-	72756415	72756731	MSC	X	0	3	0	5	0	1	0	0	0	0	0	4	-14.2156	5.83322	14.6168	0.000131738	0.0246952
5' UTR	chr8	-	91992665	91997485	LOC100127983	X	2	2	2	11	2	9	3	9	4	10	3	9	-12.6799	1.62178	13.166	0.000285067	0.0332668
5' UTR	chr8	-	93074782	93107490	RUNX1T1	X	50	123	39	105	75	66	28	37	39	98	39	96	-10.2073	0.916152	16.6344	4.53206e-05	0.0151872
5' UTR	chr8	-	93074782	93107882	RUNX1T1	X	51	136	43	128	101	83	35	40	48	98	64	108	-10.061	0.794409	12.9395	0.000321723	0.0368104
5' UTR	chr8	-	93088282	93107490	RUNX1T1	X	25	75	29	56	53	52	18	29	31	47	23	65	-10.6729	0.874921	13.4111	0.00025014	0.0324251
5' UTR	chr8	+	96085142	96085220	MIR3150A	X	0	7	0	13	0	0	0	0	0	8	3	2	-13.3955	3.59117	20.8595	4.94239e-06	0.00570367
5' UTR	chr8	-	96085224	96085226	MIR3150B	X	0	5	0	11	0	0	0	0	0	6	1	1	-13.7027	4.11677	18.1046	2.09091e-05	0.0106092
5' UTR	chr8	+	99439250	99440206	KCNS2	X	1	9	0	39	0	2	0	0	0	0	0	0	-12.8872	4.86665	34.0204	5.45379e-09	3.35672e-05
5' UTR	chr8	+	99956631	99961179	OSR2	X	6	57	15	66	2	19	2	0	8	28	14	6	-11.4524	1.74437	28.9287	7.50939e-08	0.000213319
5' UTR	chr8	+	110346552	110348364	ENY2	X	0	4	0	4	0	0	0	13	0	4	0	7	-13.3663	7.055	35.1428	3.06399e-09	3.35672e-05
5' UTR	chr8	+	126010720	126011644	SQLE	X	0	4	0	1	0	5	0	0	0	0	0	2	-14.3556	5.77042	13.077	0.000298945	0.0346074
5' UTR	chr8	-	132052581	132052835	ADCY8	X	0	0	0	12	0	1	0	2	0	0	0	0	-14.0427	5.28446	14.2289	0.000161868	0.0276742
5' UTR	chr8	+	135610314	135612931	ZFAT-AS1	X	15	39	10	31	5	19	0	0	11	16	7	13	-11.7817	1.2894	15.106	0.000101642	0.0226117
5' UTR	chr8	-	142368025	142377365	GPR20	X	68	141	111	423	52	113	29	51	78	81	64	76	-9.75055	0.90975	17.2567	3.26552e-05	0.0124865
5' UTR	chr8	-	143747479	143751401	JRK	X	33	121	58	237	51	68	69	84	70	151	84	61	-9.91378	0.892626	16.542	4.75838e-05	0.0152802
5' UTR	chr8	-	144812754	144815914	FAM83H	X	16	52	4	54	11	19	18	14	31	54	30	31	-11.0759	1.00361	14.5152	0.000139037	0.0254672
5' UTR	chr8	-	144904067	144911196	PUF60	X	58	95	42	109	52	64	25	42	57	115	35	44	-10.2907	0.782628	12.1126	0.000500825	0.0483432
5' UTR	chr8	-	145652330	145653927	VPS28	X	12	28	11	39	8	12	13	20	20	61	12	17	-11.3675	1.16839	17.1632	3.43025e-05	0.0126676
5' UTR	chr9	+	71788971	71789287	TJP2	X	0	0	0	15	0	3	0	0	0	0	0	0	-13.8487	5.11991	16.3057	5.39017e-05	0.01563
5' UTR	chr9	+	97847727	97847822	MIR27B	X	0	3	0	5	0	6	0	0	0	6	1	1	-13.7852	4.09778	17.0451	3.65029e-05	0.0129999
5' UTR	chr9	-	99538353	99540328	ZNF510	X	25	6	24	9	34	3	10	17	26	21	27	20	-11.4995	-1.02463	13.2801	0.000268242	0.033057
5' UTR	chr9	-	104500263	104500862	GRIN3A	X	0	3	0	3	0	3	0	0	0	5	0	2	-14.0843	6.56749	18.7298	1.50614e-05	0.00869066
5' UTR	chr9	-	116859984	116861337	KIF12	X	0	11	0	4	2	8	0	2	2	6	2	6	-13.0939	2.74753	21.0988	4.36211e-06	0.0051964
5' UTR	chr9	-	123688355	123689173	TRAF1	X	2	0	4	1	1	0	0	0	3	0	2	0	-14.3404	-3.92736	12.8687	0.000334131	0.0379665
5' UTR	chr9	+	127054250	127055218	NEK6	X	10	0	12	5	11	1	0	1	4	3	10	5	-12.7901	-1.70004	14.5022	0.000139994	0.0254672
5' UTR	chr9	-	130953138	130953868	CIZ1	X	7	5	11	2	10	4	0	0	14	4	28	9	-12.3625	-1.54303	15.5873	7.87817e-05	0.0185809
5' UTR	chr9	+	131218679	131219683	ODF2	X	6	0	0	0	2	0	0	0	4	0	0	0	-14.4219	-5.92966	14.8698	0.000115193	0.0241702
5' UTR	chr9	+	131219186	131219683	ODF2	X	6	0	0	0	2	0	0	0	4	0	0	0	-14.4219	-5.92966	14.8698	0.000115193	0.0241702
5' UTR	chr9	+	134378289	134381539	POMT1	X	37	10	26	25	28	19	46	24	37	19	37	15	-11.1099	-0.930157	13.4247	0.000248334	0.0324251
5' UTR	chr9	+	139640613	139644362	LOC100128593	X	78	30	126	82	96	71	94	32	76	44	99	87	-10.0737	-0.818564	14.1104	0.000172386	0.0286758
5' UTR	chr9	+	140122018	140122786	RNF224	X	4	8	21	4	10	1	0	0	2	0	15	3	-12.6743	-1.69245	14.7311	0.000123982	0.0243499
5' UTR	chr10	+	22634399	22634539	SPAG6	X	0	1	0	11	0	0	0	0	0	1	0	0	-14.2199	5.02901	12.5194	0.000402741	0.0428612
5' UTR	chr10	+	26505236	26505737	GAD2	X	0	2	0	18	0	3	0	2	0	4	0	5	-13.3033	6.6021	34.3592	4.58227e-09	3.35672e-05
5' UTR	chr10	+	35464524	35464629	CREM	X	0	6	0	2	0	1	1	1	0	3	0	3	-14.0814	3.75379	12.46	0.000415762	0.0435428
5' UTR	chr10	+	50817141	50824614	CHAT	X	6	20	29	108	17	57	4	3	26	25	31	40	-11.0104	1.05585	14.8273	0.000117815	0.0243499
5' UTR	chr10	+	50887684	50887742	C10orf53	X	0	0	0	8	0	1	0	0	0	4	0	0	-14.2836	5.45665	13.2655	0.000270335	0.033057
5' UTR	chr11	+	1244295	1244352	MUC5B	X	4	0	0	0	4	0	0	0	1	0	2	0	-14.5076	-6.57406	16.1812	5.75619e-05	0.0162268
5' UTR	chr11	-	2291564	2292182	ASCL2	X	0	2	0	36	0	0	0	2	0	9	5	3	-12.8382	3.19672	24.3606	7.98842e-07	0.00134093
5' UTR	chr11	+	24518556	24518788	LUZP2	X	0	1	0	16	0	0	0	0	0	0	0	0	-13.991	4.91593	13.8629	0.000196646	0.0298846
5' UTR	chr11	-	30601922	30607930	MPPED2	X	15	24	9	58	15	46	15	16	9	24	11	31	-11.2784	1.35433	23.5639	1.2083e-06	0.00185923
5' UTR	chr11	+	32457285	32461619	WT1-AS	X	8	17	2	41	2	23	3	2	0	3	6	18	-12.0205	2.26145	32.6103	1.12617e-08	5.94119e-05
5' UTR	chr11	+	43918853	43921423	LOC729799	X	12	6	4	27	2	10	1	5	0	10	0	5	-12.4476	1.59924	14.51	0.00013942	0.0254672
5' UTR	chr11	+	46383145	46387805	DGKZ	X	17	42	17	38	13	21	8	6	6	44	15	17	-11.3978	1.09864	14.8917	0.00011386	0.0241651
5' UTR	chr11	-	49228404	49230222	FOLH1	X	0	0	0	5	0	3	0	2	2	5	0	13	-13.4585	3.47449	18.7392	1.49871e-05	0.00869066
5' UTR	chr11	-	49229963	49230222	FOLH1	X	0	0	0	1	0	0	0	0	0	4	0	8	-14.2759	5.41907	13.4052	0.000250922	0.0324251
5' UTR	chr11	+	61100654	61102199	DAK	X	7	8	0	14	0	13	0	0	0	6	0	3	-12.8989	2.55577	21.7382	3.12514e-06	0.00397959
5' UTR	chr11	-	62341316	62341460	EEF1G	X	2	0	2	0	4	0	0	0	0	0	2	0	-14.6026	-6.67873	16.1116	5.9716e-05	0.016331
5' UTR	chr11	-	62782432	62783317	SLC22A8	X	37	35	43	66	23	48	8	11	13	55	18	47	-10.8928	0.904563	12.7263	0.000360552	0.0399086
5' UTR	chr11	+	63275459	63276071	LGALS12	X	1	9	0	5	1	4	1	4	0	2	0	3	-13.4285	2.99418	17.2552	3.2681e-05	0.0124865
5' UTR	chr11	-	64577583	64578035	MEN1	X	2	0	5	1	1	0	2	0	4	0	2	0	-14.0138	-3.41536	14.9628	0.000109651	0.0235424
5' UTR	chr11	-	64577583	64578188	MEN1	X	2	0	5	1	1	0	2	0	4	0	2	0	-14.0138	-3.41536	14.9628	0.000109651	0.0235424
5' UTR	chr11	-	64577583	64578213	MEN1	X	2	0	5	1	1	0	2	0	4	0	2	0	-14.0138	-3.41536	14.9628	0.000109651	0.0235424
5' UTR	chr11	-	71822324	71823822	C11orf51	X	0	6	0	9	2	5	0	0	0	0	3	7	-13.376	2.45622	12.7849	0.000349423	0.0391026
5' UTR	chr11	+	85566144	85576165	CCDC83	X	14	28	5	19	3	9	16	21	13	25	8	25	-11.6723	1.19688	15.5822	7.8995e-05	0.0185809
5' UTR	chr11	+	92702789	92702890	MTNR1B	X	2	4	5	15	1	15	1	2	1	3	0	3	-12.8682	1.81224	12.4351	0.000421339	0.0435428
5' UTR	chr11	+	131780712	131781374	NTM	X	2	5	0	9	0	6	0	0	0	3	0	3	-13.4673	3.45084	19.2098	1.1711e-05	0.00847993
5' UTR	chr12	+	4918342	4919206	KCNA6	X	0	6	0	12	3	9	5	3	1	4	3	6	-12.9084	1.75475	12.2309	0.00047004	0.0467873
5' UTR	chr12	-	21926552	21927747	KCNJ8	X	0	18	2	19	4	8	0	1	2	5	4	3	-12.6464	2.04965	18.548	1.65677e-05	0.00936952
5' UTR	chr12	-	45270510	45270633	NELL2	X	0	6	0	1	0	0	0	2	0	0	0	1	-14.5166	5.76658	12.135	0.000494835	0.0480885
5' UTR	chr12	-	49075417	49076035	C12orf41	X	0	0	4	0	2	0	0	0	2	0	0	0	-14.8268	-6.23575	12.2675	0.00046091	0.0461272
5' UTR	chr12	+	53894705	53895807	TARBP2	X	0	0	0	4	0	7	0	0	0	5	0	0	-14.0897	5.75338	16.4846	4.90468e-05	0.0156142
5' UTR	chr12	+	53895377	53895807	TARBP2	X	0	0	0	4	0	7	0	0	0	2	0	0	-14.2174	5.49734	13.7361	0.000210369	0.0306498
5' UTR	chr12	+	56414689	56415276	IKZF4	X	20	7	16	14	32	18	33	6	36	11	40	30	-11.3226	-1.1133	16.8905	3.95992e-05	0.0139272
5' UTR	chr12	-	57398703	57400297	ZBTB39	X	0	11	0	11	5	10	0	0	0	2	3	2	-13.0634	2.1391	13.6368	0.000221793	0.0312933
5' UTR	chr12	+	65218352	65218658	TBC1D30	X	0	0	0	9	0	4	0	0	0	0	0	0	-14.1597	5.01537	12.71	0.00036371	0.0399746
5' UTR	chr12	-	114841705	114846247	TBX5	X	11	60	15	29	7	24	5	3	8	16	11	14	-11.5759	1.2577	16.5869	4.64717e-05	0.0151872
5' UTR	chr13	-	51417784	51417885	DLEU7	X	1	7	0	2	1	6	0	1	0	3	0	2	-13.7427	3.19135	14.0645	0.000176643	0.0286824
5' UTR	chr13	+	76194570	76195828	LMO7	X	0	6	0	1	0	0	0	2	0	0	0	3	-14.3505	5.90916	14.0701	0.000176126	0.0286824
5' UTR	chr13	+	114321597	114321700	GRK1	X	3	4	0	12	0	9	0	2	2	3	1	3	-13.1765	2.18931	13.4942	0.000239302	0.0324251
5' UTR	chr13	-	114535664	114536714	GAS6	X	12	40	22	30	8	17	0	2	3	31	13	8	-11.6708	1.16855	13.6412	0.000221279	0.0312933
5' UTR	chr14	-	24803860	24804277	ADCY4	X	2	0	0	18	0	2	0	0	1	4	0	2	-13.4722	2.67729	12.1456	0.000492034	0.0479428
5' UTR	chr14	+	29241910	29247765	C14orf23	X	4	14	15	30	2	30	3	2	3	3	10	23	-11.9332	1.41931	15.9913	6.36343e-05	0.0170286
5' UTR	chr14	+	37126773	37131293	PAX9	X	0	20	2	34	5	5	3	4	1	15	4	9	-12.2438	2.56301	35.4228	2.65358e-09	3.35672e-05
5' UTR	chr14	-	57272176	57277184	OTX2	O	6	21	4	46	7	20	0	9	9	13	1	17	-11.7885	2.19435	39.205	3.81556e-10	1.40905e-05
5' UTR	chr14	-	94254066	94254766	PRIMA1	X	3	21	4	40	25	7	2	9	8	30	13	16	-11.6923	1.1551	13.4819	0.000240877	0.0324251
5' UTR	chr14	+	101491901	101491987	MIR1197	X	1	4	0	5	0	9	0	2	2	1	0	3	-13.5289	2.77558	14.0046	0.000182362	0.0290278
5' UTR	chr14	+	101531784	101531873	MIR412	X	0	9	3	23	2	7	4	2	2	4	3	5	-12.6944	1.75701	13.8474	0.000198267	0.0299407
5' UTR	chr14	+	101531935	101532003	MIR369	X	2	10	1	26	1	10	4	4	2	9	3	2	-12.5632	2.16957	21.7721	3.07038e-06	0.00397959
5' UTR	chr14	+	103995509	103996314	TRMT61A	X	0	8	0	4	0	3	0	1	3	0	1	12	-13.3688	2.57083	14.3439	0.000152274	0.0267777
5' UTR	chr14	+	104583742	104583850	MIR203	X	0	2	0	3	0	2	0	4	0	0	0	1	-14.2826	6.2253	14.3449	0.000152191	0.0267777
5' UTR	chr14	+	105155943	105167701	INF2	X	105	115	57	174	56	94	10	33	43	87	58	55	-10.119	0.824049	13.3715	0.00025547	0.0324251
5' UTR	chr15	+	22955755	22956055	CYFIP1	X	15	39	9	57	22	35	6	14	13	21	19	12	-11.3256	1.01783	13.2206	0.000276886	0.0332668
5' UTR	chr15	-	52861091	52861213	ARPP19	X	0	0	6	0	2	0	0	0	3	0	6	1	-14.0664	-4.3926	18.9893	1.3145e-05	0.00853602
5' UTR	chr15	-	65502095	65503840	CILP	X	2	10	21	12	21	2	7	0	11	5	23	8	-12.0936	-1.29492	14.1989	0.00016447	0.0279895
5' UTR	chr15	-	70994256	70994620	UACA	X	6	0	4	0	6	1	2	2	2	0	0	0	-13.7683	-3.06813	16.2218	5.63417e-05	0.016129
5' UTR	chr15	+	75639331	75641245	NEIL1	X	2	10	2	14	3	7	1	6	6	3	0	7	-12.7455	1.65139	12.8368	0.000339863	0.0383817
5' UTR	chr16	+	811073	812679	MSLN	X	9	13	7	32	4	10	0	2	5	13	0	3	-12.2742	1.51709	14.6044	0.000132603	0.0247318
5' UTR	chr16	+	1359180	1364030	UBE2I	X	23	64	12	70	35	45	13	29	17	51	26	13	-10.9099	1.07137	17.6648	2.63451e-05	0.012167
5' UTR	chr16	+	1359361	1364030	UBE2I	X	23	64	12	70	35	45	13	29	17	51	26	13	-10.912	1.06687	17.5081	2.86087e-05	0.0124317
5' UTR	chr16	+	1359638	1364030	UBE2I	X	23	64	12	70	35	45	13	29	17	51	26	13	-10.912	1.06687	17.5081	2.86087e-05	0.0124317
5' UTR	chr16	+	1584231	1584275	TMEM204	X	3	8	0	10	0	7	2	1	2	5	3	5	-13.017	1.82717	12.1301	0.000496134	0.0480885
5' UTR	chr16	-	3493155	3493490	ZNF597	X	12	13	5	23	2	21	0	2	2	1	4	14	-12.259	1.49229	14.1875	0.000165469	0.0280303
5' UTR	chr16	+	28875078	28877414	SH2B1	X	2	14	7	24	11	28	0	9	15	6	3	27	-11.8863	1.50768	19.7908	8.63969e-06	0.00778183
5' UTR	chr16	+	28875296	28877414	SH2B1	X	2	14	7	24	11	28	0	9	15	6	3	27	-11.8863	1.50768	19.7908	8.63969e-06	0.00778183
5' UTR	chr16	+	28875314	28877414	SH2B1	X	2	14	7	24	11	28	0	9	15	6	3	27	-11.8863	1.50768	19.7908	8.63969e-06	0.00778183
5' UTR	chr16	-	30041850	30042186	FAM57B	X	3	1	19	5	13	9	5	1	8	0	14	8	-12.4484	-1.46734	14.0802	0.00017518	0.0286824
5' UTR	chr16	+	30077044	30078574	ALDOA	X	0	1	9	1	2	0	3	0	1	0	1	0	-14.0121	-3.48473	15.1944	9.69915e-05	0.0217079
5' UTR	chr16	+	30935896	30936052	FBXL19	X	4	1	8	0	3	0	1	0	2	0	7	3	-13.4987	-2.49508	15.5635	7.97799e-05	0.0186468
5' UTR	chr16	+	56995835	56995890	CETP	X	0	3	0	5	0	1	0	1	0	0	0	3	-14.2153	6.13872	15.0086	0.000107025	0.0235424
5' UTR	chr16	+	77233347	77233349	SYCE1L	X	0	1	0	1	0	2	0	1	0	4	0	2	-14.5163	6.58017	12.5501	0.000396175	0.0425301
5' UTR	chr16	+	81528954	81529080	CMIP	X	0	6	0	6	0	3	0	0	0	9	0	0	-13.6585	6.46845	28.2072	1.08998e-07	0.000268346
5' UTR	chr16	-	87350850	87351026	C16orf95	X	0	0	6	0	2	0	2	0	0	0	0	0	-14.6026	-6.22182	15.8352	6.91053e-05	0.0179718
5' UTR	chr17	+	7255208	7256260	KCTD11	X	3	8	0	9	2	10	0	0	0	4	1	2	-13.171	2.25135	14.2836	0.000157227	0.027132
5' UTR	chr17	-	10267849	10276322	MYH13	X	53	34	63	27	57	38	82	48	62	32	83	58	-10.443	-0.786254	12.2023	0.000477308	0.0471297
5' UTR	chr17	+	36452989	36453148	MRPL45	X	6	0	4	0	0	0	0	0	0	0	0	0	-14.6061	-5.73014	13.3425	0.000259463	0.0325909
5' UTR	chr17	+	45772630	45773477	TBKBP1	X	6	5	2	31	1	15	0	2	2	10	8	7	-12.3779	1.71482	16.7077	4.36041e-05	0.0149098
5' UTR	chr17	+	45908993	45909354	LRRC46	X	14	4	22	4	7	15	3	0	11	3	20	5	-12.2205	-1.36612	14.3073	0.000155265	0.0270181
5' UTR	chr17	+	45973516	45973651	SP2	X	0	0	12	0	0	0	0	0	0	0	0	0	-14.4196	-5.54881	16.2961	5.41752e-05	0.01563
5' UTR	chr17	+	54911460	54912155	DGKE	X	0	12	0	18	2	3	2	0	0	0	0	2	-13.155	2.76936	17.199	3.36607e-05	0.0126676
5' UTR	chr17	+	55122839	55124155	RNF126P1	X	10	6	2	35	7	22	0	4	1	8	0	11	-12.181	1.95946	23.8917	1.01911e-06	0.0016363
5' UTR	chr17	-	61959163	61959223	GH2	X	8	0	3	0	2	0	0	0	0	0	1	0	-14.2677	-6.30834	19.4623	1.02607e-05	0.00797034
5' UTR	chr17	+	72462522	72462841	CD300A	X	0	14	0	3	0	1	0	4	0	3	0	0	-13.6579	6.36354	27.9818	1.2246e-07	0.000282645
5' UTR	chr17	+	78234667	78237479	RNF213	X	8	0	19	8	21	6	3	5	9	3	18	3	-12.2619	-1.62729	19.5974	9.55973e-06	0.00797034
5' UTR	chr17	-	79139794	79139872	AATK	X	0	6	0	1	0	4	0	0	0	0	0	0	-14.3546	5.58764	13.2949	0.000266126	0.033057
5' UTR	chr17	+	79762010	79766893	GCGR	X	36	20	48	33	49	24	40	32	52	12	55	18	-10.8609	-1.03427	18.1251	2.06859e-05	0.0106092
5' UTR	chr18	-	25756988	25757445	CDH2	X	0	0	0	10	0	1	0	1	0	0	0	4	-13.9875	5.5242	16.1985	5.70405e-05	0.0162034
5' UTR	chr18	+	32398247	32400831	DTNA	X	6	17	0	7	3	3	0	4	2	10	0	3	-12.8558	1.96858	15.6865	7.47576e-05	0.0185283
5' UTR	chr18	+	32398302	32400831	DTNA	X	6	17	0	7	3	3	0	4	2	10	0	3	-12.8558	1.96858	15.6865	7.47576e-05	0.0185283
5' UTR	chr18	-	70534528	70534810	NETO1	X	2	0	0	10	1	8	0	4	0	1	0	0	-13.5039	2.64623	12.2995	0.00045307	0.0457143
5' UTR	chr18	+	77794346	77794494	RBFA	X	1	0	2	0	3	0	1	0	1	0	0	0	-14.8273	-6.75222	12.7192	0.000361912	0.0399086
5' UTR	chr19	-	3785135	3786415	MATK	X	0	0	2	13	4	7	0	4	2	22	0	0	-12.8899	2.27494	17.0698	3.60306e-05	0.0129999
5' UTR	chr19	+	3933101	3933668	ITGB1BP3	X	0	1	0	0	6	1	0	0	2	0	11	0	-13.9007	-3.56263	16.5943	4.62899e-05	0.0151872
5' UTR	chr19	-	4558471	4559771	SEMA6B	X	3	8	3	16	2	7	3	15	3	4	6	11	-12.4589	1.53006	14.0121	0.000181636	0.0290278
5' UTR	chr19	-	6670082	6670599	TNFSF14	X	5	2	14	1	16	2	10	2	8	3	5	1	-12.7133	-2.50713	29.9391	4.45822e-08	0.000182931
5' UTR	chr19	+	7599038	7600435	PNPLA6	X	0	7	0	0	0	0	0	2	0	0	0	4	-14.348	5.6162	13.9011	0.000192686	0.0298846
5' UTR	chr19	+	7599128	7600435	PNPLA6	X	0	7	0	0	0	0	0	2	0	0	0	4	-14.348	5.6162	13.9011	0.000192686	0.0298846
5' UTR	chr19	+	7599591	7600435	PNPLA6	X	0	6	0	0	0	0	0	2	0	0	0	4	-14.4282	5.68626	12.8198	0.000342973	0.0386147
5' UTR	chr19	-	9929491	9929731	FBXL12	X	0	0	6	1	2	0	0	0	2	0	2	0	-14.3395	-3.99873	13.6088	0.000225123	0.0313719
5' UTR	chr19	-	14887570	14889353	EMR2	X	4	2	17	2	3	4	24	9	11	8	8	0	-12.3976	-1.43456	13.7985	0.000203502	0.0299407
5' UTR	chr19	-	14939055	14939276	OR7A5	X	4	0	0	2	10	3	23	8	6	2	8	2	-12.7045	-1.5653	12.5846	0.000388937	0.0422278
5' UTR	chr19	+	36630918	36631912	CAPNS1	X	0	0	0	0	6	0	0	0	0	0	5	0	-14.6004	-6.00542	15.658	7.58917e-05	0.0185603
5' UTR	chr19	-	37406071	37407193	ZNF829	X	13	65	41	78	33	59	14	5	16	49	38	45	-10.7712	0.878787	12.4391	0.000420447	0.0435428
5' UTR	chr19	+	38826443	38827873	CATSPERG	X	9	9	59	10	34	31	15	9	45	5	34	26	-11.2281	-1.14509	17.473	2.91417e-05	0.0124317
5' UTR	chr19	-	42637665	42637667	MIR4323	X	5	0	8	2	4	1	0	0	7	3	1	0	-13.4367	-2.16404	12.464	0.000414868	0.0435428
5' UTR	chr19	-	46916069	46916919	CCDC8	X	1	6	0	16	1	9	0	0	0	0	0	3	-13.2324	3.68647	23.1315	1.51295e-06	0.00223487
5' UTR	chr19	+	47421931	47421933	GRLF1	X	0	3	0	1	0	5	0	1	0	1	0	3	-14.1488	6.37069	16.7425	4.2811e-05	0.0147754
5' UTR	chr19	+	48828629	48830100	EMP3	X	17	4	19	1	17	11	13	7	19	2	30	19	-11.815	-1.45152	21.5315	3.48058e-06	0.00428448
5' UTR	chr19	-	49148891	49149451	CA11	X	2	7	38	12	24	20	17	3	39	4	35	30	-11.4519	-1.07505	13.8747	0.000195413	0.0298846
5' UTR	chr19	-	50399419	50400147	IL4I1	X	28	7	15	8	23	19	10	15	35	17	44	11	-11.4457	-0.97352	12.2212	0.000472485	0.0469043
5' UTR	chr19	-	55720803	55720874	PTPRH	X	1	4	20	2	5	2	1	0	4	0	7	2	-13.0059	-1.83837	13.4351	0.000246956	0.0324251
5' UTR	chr19	+	56165416	56166469	U2AF2	X	0	0	13	1	3	0	0	0	2	0	2	0	-13.8574	-3.7741	18.9678	1.32945e-05	0.00853602
5' UTR	chr20	+	11871477	11899105	BTBD3	X	22	53	46	66	39	91	41	73	47	74	49	70	-10.3921	0.811401	12.9381	0.000321962	0.0368104
5' UTR	chr20	+	19193290	19193485	SLC24A3	X	0	0	2	0	2	0	0	0	2	0	2	0	-14.8258	-6.74157	12.7186	0.000362029	0.0399086
5' UTR	chr20	-	26188914	26188916	MIR663	X	1	7	8	369	45	71	16	27	12	9	37	46	-10.4777	1.45906	25.3526	4.77505e-07	0.000928093
5' UTR	chr20	+	30073581	30075376	NCRNA00028	X	21	9	28	3	17	14	23	7	22	4	18	25	-11.6406	-1.15739	15.6124	7.77439e-05	0.0185809
5' UTR	chr20	-	36147578	36152953	BLCAP	X	39	68	28	110	46	72	23	21	28	55	41	54	-10.534	0.815589	12.1105	0.00050138	0.0483432
5' UTR	chr20	+	36932552	36932612	BPI	X	5	5	10	6	13	0	10	1	13	7	19	5	-12.3841	-1.59583	17.9553	2.26148e-05	0.010707
5' UTR	chr20	-	47892378	47894756	ZNFX1	X	23	4	52	19	32	26	11	9	31	4	33	20	-11.3057	-1.22422	19.8329	8.45169e-06	0.00778183
5' UTR	chr20	-	54579229	54580012	CBLN4	X	4	26	0	17	0	7	1	1	7	14	3	2	-12.4724	2.25103	24.6801	6.76809e-07	0.00119019
5' UTR	chr20	+	54987314	54987513	CASS4	X	1	0	11	0	0	1	0	0	1	0	0	0	-14.2665	-4.0011	13.1569	0.000286464	0.0332668
5' UTR	chr20	-	57089765	57089949	APCDD1L	X	0	4	0	8	0	0	0	1	0	3	0	0	-14.0892	5.7013	17.0913	3.56248e-05	0.0129999
5' UTR	chr20	+	57226309	57242559	STX16	X	42	71	27	53	53	62	54	109	50	97	21	75	-10.3235	0.961785	18.1071	2.08824e-05	0.0106092
5' UTR	chr20	+	57226309	57254581	STX16	X	155	151	53	184	91	120	93	169	106	175	43	142	-9.6017	0.924763	18.9785	1.322e-05	0.00853602
5' UTR	chr20	+	61340189	61340558	NTSR1	X	0	0	0	8	0	2	0	2	0	0	0	0	-14.2888	5.2347	12.0687	0.000512741	0.0491818
5' UTR	chr20	+	62289163	62290754	RTEL1	X	9	20	0	22	1	1	3	0	5	18	5	4	-12.4103	1.53407	13.4885	0.000240032	0.0324251
5' UTR	chr20	-	62582181	62582527	UCKL1	X	9	8	0	5	0	6	0	2	0	16	2	0	-13.0195	1.94013	13.1918	0.000281182	0.0332668
5' UTR	chr21	+	34398239	34399169	OLIG2	O	2	4	0	9	0	1	0	4	0	5	0	15	-13.1685	3.96814	28.298	1.04005e-07	0.000268346
5' UTR	chr21	-	47602732	47604373	C21orf56	X	12	16	0	17	2	11	0	1	13	24	4	7	-12.2093	1.39888	13.7813	0.000205371	0.0300958
5' UTR	chr22	+	20073581	20073664	MIR1306	X	8	20	0	13	2	4	0	8	4	9	2	2	-12.5939	1.8574	17.2796	3.22634e-05	0.0124865
5' UTR	chr22	+	24105208	24105492	C22orf15	X	0	7	0	11	3	3	0	0	3	3	0	7	-13.216	2.11945	12.4376	0.00042078	0.0435428
5' UTR	chr22	-	31884706	31885874	EIF4ENIF1	X	0	0	3	0	3	0	0	0	0	0	2	0	-14.826	-6.51581	13.4727	0.000242054	0.0324251
5' UTR	chr22	+	39760175	39760198	SYNGR1	X	0	4	0	1	0	3	0	0	0	2	0	0	-14.4313	5.99927	13.3289	0.000261342	0.0327155
5' UTR	chrX	+	15518900	15526475	BMX	X	8	6	0	10	9	15	0	7	15	22	6	26	-12.0616	1.25695	12.8511	0.000337276	0.0382063
5' UTR	chrX	+	21392536	21393014	CNKSR2	X	1	15	0	16	0	1	2	5	4	8	3	0	-12.8811	2.09152	16.0982	6.01427e-05	0.016331
5' UTR	chrX	+	41583408	41586278	GPR82	X	4	2	9	1	9	1	6	2	0	0	5	2	-13.2373	-1.99228	13.4634	0.000243262	0.0324251
5' UTR	chrX	+	51486481	51486721	GSPT2	X	0	3	2	10	0	10	0	6	1	5	4	1	-13.1042	2.28231	15.3111	9.11805e-05	0.0209143
5' UTR	chrX	-	70837464	70838367	CXCR3	X	29	18	45	7	35	21	17	3	19	14	51	28	-11.2341	-1.18237	19.4439	1.03598e-05	0.00797034
5' UTR	chrX	+	96138907	96139308	RPA4	X	2	9	0	8	5	7	5	4	3	13	2	13	-12.6283	1.64131	14.2516	0.000159926	0.0274693
5' UTR	chrX	-	100603654	100603957	TIMM8A	X	0	8	1	7	2	7	0	2	4	5	0	2	-13.2102	2.01983	12.1712	0.000485341	0.0477951
5' UTR	chrX	-	106243201	106243474	MORC4	X	1	3	0	6	0	2	0	2	0	1	0	3	-13.8813	3.92542	14.8068	0.000119105	0.0243499
5' UTR	chrX	+	135730336	135730406	CD40LG	X	0	3	0	2	0	1	0	2	0	1	0	2	-14.3529	6.66435	14.3282	0.000153546	0.0268735
5' UTR	chrX	-	142718926	142722319	SLITRK4	X	14	31	7	38	7	17	5	9	16	23	11	31	-11.5526	1.34781	20.3539	6.43614e-06	0.00700689
5' UTR	chrX	-	152710890	152711945	TREX2	X	8	12	0	20	3	7	0	7	6	11	3	6	-12.4351	1.72448	17.6074	2.7153e-05	0.0123794
intron	chr1	-	91851393	91859648	HFM1	X	184	328	361	591	146	221	129	250	32	91	91	134	-10.9952	0.814912	24.0711	9.28426e-07	0.0117039
intron	chr2	+	1520756	1544364	TPO	X	251	186	486	272	480	485	160	99	499	124	663	632	-10.4727	-0.680718	20.2035	6.9627e-06	0.0473287
intron	chr2	+	101606910	101607240	NPAS2	X	5	19	0	16	0	4	0	2	0	12	0	6	-14.6835	4.08469	23.8817	1.02444e-06	0.0122463
intron	chr2	+	179388365	179436025	LOC100506866	X	89	73	47	145	66	110	32	71	62	128	54	92	-11.9763	0.841783	21.3184	3.88973e-06	0.0313594
intron	chr3	-	147114258	147120513	ZIC4	X	7	44	9	51	14	42	6	15	9	28	35	41	-13.1587	1.60038	24.341	8.07028e-07	0.0106264
exon	chr3	-	172165333	172166246	GHSR	O	6	39	3	73	4	12	2	8	6	12	5	17	-13.6525	2.53435	31.2581	2.25897e-08	0.00142385
exon	chr3	-	172165408	172166246	GHSR	O	6	32	1	64	3	8	2	7	4	11	4	16	-13.8358	2.72581	27.0995	1.93251e-07	0.00529528
exon	chr4	-	41746099	41748339	PHOX2B	X	3	32	0	24	3	15	3	2	0	6	1	13	-14.2649	3.31725	24.269	8.37758e-07	0.0107565
intron	chr5	+	1802490	1814451	NDUFS6	X	148	206	119	517	106	194	99	77	116	209	126	233	-11.2089	0.834573	23.8891	1.02048e-06	0.0122463
intron	chr5	-	1882175	1882715	IRX4	O	0	10	0	28	0	0	0	0	0	8	0	3	-15.0296	8.48438	22.0501	2.65628e-06	0.0255792
exon	chr5	-	2749496	2749901	IRX2	X	4	12	0	133	0	9	1	6	3	1	4	1	-13.7732	3.0358	24.5716	7.15975e-07	0.0104334
intron	chr5	-	2749903	2751277	IRX2	X	1	15	5	86	0	9	1	8	3	3	1	3	-14.0214	3.49931	27.79	1.35226e-07	0.00446466
exon	chr5	+	6754864	6757161	PAPD7	X	25	26	10	109	19	35	7	24	23	39	8	27	-13.0255	1.47533	21.5523	3.44301e-06	0.0294713
exon	chr5	+	6754867	6757161	PAPD7	X	25	26	10	109	19	35	7	24	23	39	8	27	-13.0255	1.47533	21.5523	3.44301e-06	0.0294713
exon	chr5	-	134363424	134365011	PITX1	O	12	31	3	77	15	45	1	6	7	30	14	28	-13.2748	2.04697	33.76	6.23485e-09	0.00048032
exon	chr5	+	145719111	145720083	POU4F3	X	17	25	7	35	0	17	1	6	3	13	1	17	-13.9367	2.58216	22.1026	2.58462e-06	0.0252398
intron	chr6	-	139232510	139233900	REPS1	X	26	13	69	16	136	33	20	18	105	23	93	82	-12.3794	-1.29393	26.8158	2.23796e-07	0.00529528
intron	chr7	-	16415868	16445684	ISPD	X	36	73	21	87	72	112	36	63	37	148	40	98	-12.1421	1.29305	41.7934	1.01445e-10	1.40671e-05
intron	chr7	-	96608905	96643235	DLX6-AS1	X	82	177	63	154	73	131	63	77	48	113	82	117	-11.783	0.883538	25.6589	4.07417e-07	0.00807083
exon	chr7	-	123332401	123332921	WASL	X	5	3	58	14	43	27	18	2	53	7	51	45	-13.0534	-1.46603	20.4425	6.14488e-06	0.0461131
intron	chr7	+	155538298	155556504	RBM33	X	39	71	18	62	32	74	17	53	20	42	27	44	-12.6537	1.22129	20.7529	5.2253e-06	0.0402546
exon	chr8	+	99440166	99443023	KCNS2	X	22	28	9	98	1	8	1	8	1	18	4	9	-13.5682	2.46291	30.3786	3.55424e-08	0.00183111
intron	chr8	-	101545541	101571937	ANKRD46	X	77	124	44	138	50	91	43	83	44	79	88	97	-11.9837	0.841622	21.4038	3.72031e-06	0.0311026
exon	chr8	+	123963532	123966268	ZHX2	X	85	93	51	220	61	80	7	26	47	109	35	38	-12.1068	0.918481	21.3746	3.77741e-06	0.031179
intron	chr8	-	124243999	124250036	ZHX1-C8ORF76	X	49	82	50	121	46	81	62	77	37	92	24	65	-12.1887	0.971616	23.5993	1.18633e-06	0.0134841
intron	chr8	-	124243999	124250036	C8orf76	X	49	82	50	121	46	81	62	77	37	92	24	65	-12.1887	0.971616	23.5993	1.18633e-06	0.0134841
intron	chr8	-	125603478	125711765	MTSS1	X	743	1209	808	2200	981	922	837	1106	867	1486	894	1007	-9.37311	0.554753	27.3256	1.7192e-07	0.00496664
intron	chr8	-	140744447	140898121	TRAPPC9	X	2215	3424	2940	7921	3376	3115	2137	2934	3485	5260	3632	3341	-8.15885	0.471824	242.387	1.18668e-54	4.11388e-49
intron	chr8	-	140898215	140922389	TRAPPC9	X	195	271	122	602	105	163	98	84	142	290	116	148	-11.1242	0.818634	23.2053	1.45594e-06	0.0155302
intron	chr8	-	140922546	140998932	TRAPPC9	X	899	1180	831	2204	781	991	714	856	805	1584	879	889	-9.40847	0.552907	26.5862	2.52032e-07	0.00529528
intron	chr8	-	141034178	141231556	TRAPPC9	X	1700	2423	2017	4383	1971	2229	1525	1863	1860	3164	1971	2048	-8.64131	0.473884	45.9871	1.19036e-11	2.06331e-06
intron	chr8	-	141310715	141321345	TRAPPC9	X	78	133	66	228	54	98	83	85	46	210	77	81	-11.7247	0.951947	29.0535	7.04056e-08	0.00287148
intron	chr8	+	142148238	142151300	DENND3	X	68	94	66	255	58	75	64	85	73	201	66	77	-11.7787	0.853625	23.2985	1.38711e-06	0.0152657
intron	chr8	+	142154360	142160931	DENND3	X	61	75	69	298	44	100	38	61	52	132	77	66	-11.9006	0.942036	26.7577	2.30628e-07	0.00529528
exon	chr8	-	142366587	142368047	GPR20	X	42	56	8	312	28	44	17	19	38	87	45	19	-12.3062	1.0683	21.3465	3.83317e-06	0.0312669
intron	chr8	-	142368049	142377299	GPR20	X	62	134	112	419	54	113	33	55	81	79	68	80	-11.7282	0.891286	24.3344	8.0982e-07	0.0106264
intron	chr8	+	142437171	142441025	PTP4A3	X	44	97	29	246	32	61	23	25	42	102	63	38	-12.1917	1.07878	26.8805	2.16429e-07	0.00529528
intron	chr8	-	143382007	143395743	TSNARE1	X	138	258	155	639	168	212	105	166	195	450	209	200	-10.8775	0.839582	26.6153	2.48272e-07	0.00529528
intron	chr8	-	143436126	143484463	TSNARE1	X	584	922	697	2017	590	707	377	476	742	1272	635	627	-9.67553	0.581907	24.3285	8.12296e-07	0.0106264
exon	chr8	-	143738874	143747939	JRK	X	119	193	112	327	79	132	62	112	81	229	106	110	-11.4391	0.909429	27.539	1.53957e-07	0.00464106
intron	chr8	-	143740358	143745893	JRK	X	65	114	69	168	41	79	37	67	51	127	56	72	-11.9908	0.93537	26.1248	3.20042e-07	0.00652641
intron	chr8	-	143747941	143751348	JRK	X	27	80	35	164	40	58	67	85	64	137	53	54	-12.0813	0.952787	24.5547	7.22304e-07	0.0104334
exon	chr8	-	144939912	144947434	EPPK1	X	130	204	72	350	74	92	61	100	100	397	94	83	-11.3776	0.976646	30.302	3.69739e-08	0.00183111
intron	chr9	+	399261	404916	DOCK8	X	57	34	76	50	206	108	161	134	117	27	181	111	-11.6987	-0.87626	25.1621	5.2709e-07	0.00891349
intron	chr9	-	91667080	91680442	SHC3	X	380	442	939	950	1610	764	1163	941	1851	865	2509	1773	-9.2921	-0.481679	20.4095	6.2518e-06	0.0461131
intron	chr9	+	117071760	117072827	COL27A1	X	1	8	0	15	1	16	0	5	0	2	0	5	-14.8907	4.4902	21.4023	3.7233e-06	0.0311026
exon	chr9	+	139641530	139643024	LOC100128593	X	54	18	102	55	82	53	79	23	62	27	79	88	-12.2663	-0.978232	20.416	6.23079e-06	0.0461131
intron	chr10	-	18840902	18874876	NSUN6	X	1066	843	1825	849	1874	1270	1898	1176	1609	948	1810	1903	-9.10687	-0.579261	35.6289	2.38724e-09	0.000275862
intron	chr12	+	81102395	81102619	MYF6	O	0	9	0	22	0	7	0	0	0	3	0	7	-15.013	8.59856	25.4088	4.63797e-07	0.00869107
exon	chr13	-	53419941	53422775	PCDH8	O	9	22	3	76	4	10	1	2	0	20	2	4	-13.8792	2.82307	24.6288	6.95043e-07	0.0104334
exon	chr13	-	53420232	53422775	PCDH8	O	8	22	3	70	3	10	1	2	0	20	1	4	-13.9398	3.22753	28.0985	1.15295e-07	0.00443778
exon	chr14	+	29236287	29238871	FOXG1	O	13	24	7	93	18	48	18	26	12	28	10	28	-13.0992	1.52557	22.9687	1.64657e-06	0.0170393
intron	chr14	-	57272295	57276875	OTX2	O	5	19	5	46	7	21	1	10	9	13	1	16	-13.851	2.26324	21.0319	4.51707e-06	0.0355894
exon	chr14	+	65007186	65009954	HSPA2	O	5	29	0	50	3	17	1	4	0	6	1	7	-14.0928	3.84595	32.0419	1.50882e-08	0.00104613
intron	chr14	-	93424713	93428698	ITPK1	X	17	21	2	57	8	37	6	10	7	30	7	11	-13.5173	1.81208	21.7875	3.04573e-06	0.027749
intron	chr15	-	28391492	28397821	HERC2	X	75	81	49	146	59	98	44	64	43	81	31	78	-12.1231	0.866501	20.2884	6.66024e-06	0.0473287
intron	chr16	+	3163490	3165354	ZNF205	X	9	26	3	17	11	43	6	26	18	29	11	29	-13.4296	1.6998	22.4414	2.16649e-06	0.0214588
exon	chr16	+	77232005	77233543	MON1B	X	5	16	3	18	0	12	0	4	4	19	2	18	-14.2375	2.788	21.171	4.20074e-06	0.0334775
intron	chr17	+	80399144	80399674	HEXDC	X	30	14	68	48	79	51	60	37	185	26	151	70	-12.1322	-1.14105	30.4001	3.51502e-08	0.00183111
intron	chr18	-	10752879	10757965	FAM38B	X	93	84	298	110	281	161	125	60	228	67	235	280	-11.2407	-0.827744	23.1617	1.48933e-06	0.0156457
intron	chr19	-	2555188	2646220	GNG7	X	1534	1273	1707	1898	2458	1272	2598	2700	2880	2026	3226	2079	-8.69383	-0.372406	23.3654	1.33966e-06	0.0149813
intron	chr19	-	3478929	3480393	C19orf77	X	29	12	43	2	39	29	11	0	35	3	42	27	-13.2405	-1.79899	27.6498	1.45385e-07	0.00458187
intron	chr19	+	3920798	3924579	ATCAY	X	105	101	223	102	255	104	227	146	230	123	271	204	-11.1895	-0.762345	20.7869	5.13333e-06	0.0399904
intron	chr19	+	7571053	7571940	C19orf45	X	22	3	47	12	30	28	25	3	50	15	63	36	-13.0267	-1.50683	23.6637	1.14725e-06	0.0134819
intron	chr19	-	8171119	8173052	FBN3	X	107	106	378	152	366	186	369	234	327	144	457	339	-10.7752	-0.804079	25.4557	4.52651e-07	0.00869107
intron	chr19	+	10222418	10224307	P2RY11	X	30	12	40	8	55	17	42	19	47	19	44	18	-12.9715	-1.49005	25.3091	4.88398e-07	0.00891123
intron	chr19	-	11319781	11322450	DOCK6	X	120	128	327	102	336	246	136	89	451	142	474	343	-10.8645	-0.812758	24.5732	7.15387e-07	0.0104334
intron	chr19	-	14758179	14761895	EMR3	X	33	37	136	27	125	82	88	40	112	35	125	90	-12.0033	-1.03112	29.8797	4.59709e-08	0.0021249
intron	chr19	+	48173803	48176825	GLTSCR1	X	68	68	159	73	208	127	168	68	204	72	233	212	-11.4305	-0.819259	22.8352	1.76502e-06	0.0179965
intron	chr19	+	49404190	49407602	NUCB1	X	81	41	111	38	135	73	82	50	117	56	129	93	-11.9289	-0.94824	27.9953	1.21611e-07	0.00443778
intron	chr19	+	49913134	49916223	CCDC155	X	68	39	107	25	63	62	40	6	65	14	70	52	-12.4363	-1.23579	24.8254	6.27651e-07	0.0103613
intron	chr19	+	49977931	49978946	FLT3LG	X	21	30	78	24	97	74	63	19	113	27	135	98	-12.1872	-0.987543	21.7402	3.12173e-06	0.027749
exon	chr20	-	26188822	26188914	MIR663	X	0	6	7	325	46	71	17	30	11	6	37	50	-12.4674	1.44639	26.9777	2.05818e-07	0.00529528
intron	chr20	+	62891627	62895780	PCMTD2	X	48	97	40	65	39	74	54	81	19	158	28	65	-12.2084	1.22313	34.0365	5.40873e-09	0.000468762
intron	chr21	+	45507811	45509712	TRAPPC10	X	17	58	49	48	4	40	5	11	13	73	19	25	-12.9614	1.44394	20.5995	5.66103e-06	0.0431321
exon	chr22	-	37576206	37576907	C1QTNF6	X	2	12	6	13	1	19	0	10	4	10	0	14	-14.3548	2.75904	20.2188	6.90716e-06	0.0473287
exon	chr22	+	42353676	42354946	BK250D10.8	X	20	5	26	20	35	21	17	5	35	1	47	18	-13.3157	-1.52934	20.1732	7.07387e-06	0.0476175
exon	chrX	-	125297482	125300080	DCAF12L2	X	10	27	7	67	14	27	6	9	20	44	6	25	-13.2965	1.6728	23.975	9.75929e-07	0.0120831
3' UTR	chr1	+	20977186	20978004	PINK1	X	1	5	0	16	0	26	1	5	5	12	3	4	-11.3449	2.81628	17.1034	3.53995e-05	0.04217
3' UTR	chr1	-	52888948	52889605	ZCCHC11	X	0	0	0	5	0	9	0	2	0	0	0	9	-12.4083	7.14917	18.1881	2.00123e-05	0.0342599
3' UTR	chr1	+	197898391	197899273	LHX9	X	0	4	0	6	0	0	0	1	0	5	0	3	-12.6773	7.43175	17.985	2.22654e-05	0.0342599
3' UTR	chr1	-	229566993	229567244	ACTA1	X	0	2	0	4	0	6	0	0	0	2	0	4	-12.7044	7.07543	16.464	4.95821e-05	0.049487
3' UTR	chr2	-	20110029	20113317	WDR35	X	2	13	0	4	0	4	0	3	0	1	0	3	-12.1859	4.10294	17.2999	3.19211e-05	0.0392939
3' UTR	chr3	-	124944513	124951183	ZNF148	X	0	8	0	6	0	0	0	2	0	0	0	4	-12.6376	7.243	17.6365	2.67408e-05	0.0372371
3' UTR	chr3	-	147103835	147106644	ZIC4	X	2	13	0	3	3	15	0	2	0	10	0	3	-11.7054	3.32881	18.4589	1.73611e-05	0.0342599
3' UTR	chr3	-	147103835	147110183	ZIC4	O	5	45	0	22	4	31	1	12	5	15	1	8	-10.7064	3.44174	30.7987	2.86233e-08	0.000528515
3' UTR	chr4	-	41746099	41747822	PHOX2B	X	3	30	0	20	2	11	3	3	0	5	0	10	-11.1928	3.18682	21.4124	3.70375e-06	0.0177537
3' UTR	chr5	-	134363424	134364467	PITX1	O	5	8	0	33	0	23	1	7	4	16	7	8	-11.0008	2.60479	17.6023	2.72252e-05	0.0372371
3' UTR	chr5	-	172659107	172660344	NKX2-5	X	0	11	0	11	0	3	0	2	0	3	0	1	-12.2265	7.84363	24.3667	7.96341e-07	0.00647741
3' UTR	chr8	-	134048973	134050767	SLA	X	1	6	1	5	0	7	0	0	0	8	0	5	-12.1407	3.76945	16.7495	4.26543e-05	0.0450107
3' UTR	chr11	-	94906133	94906417	SESN3	X	0	3	0	8	0	1	0	4	0	2	0	0	-12.6933	7.11646	16.7492	4.26595e-05	0.0450107
3' UTR	chr12	+	81102741	81103256	MYF6	X	0	8	0	8	0	3	0	0	0	6	0	3	-12.2895	7.62464	24.1808	8.77008e-07	0.00647741
3' UTR	chr13	-	31504809	31506744	LOC100507064	X	0	4	0	0	2	9	0	7	0	5	0	5	-12.1846	3.85213	16.5837	4.65498e-05	0.047751
3' UTR	chr15	+	101454980	101456830	ALDH1A3	X	0	0	0	12	0	1	0	2	0	3	0	5	-12.4874	7.14222	17.6315	2.68106e-05	0.0372371
3' UTR	chr16	+	9210771	9213555	C16orf72	X	0	5	0	4	2	22	0	0	2	7	0	8	-11.7395	3.42336	17.4405	2.96438e-05	0.039097
3' UTR	chr16	+	10862964	10863208	NUBP1	X	0	3	0	1	0	5	0	2	0	7	0	2	-12.6866	7.44929	18.4256	1.76668e-05	0.0342599
3' UTR	chr16	+	77232207	77233543	MON1B	X	2	11	0	10	0	10	0	4	1	12	0	10	-11.5597	3.89896	25.7235	3.94e-07	0.00485001
3' UTR	chr18	-	70409549	70416261	NETO1	X	0	4	0	5	0	3	0	0	0	5	0	9	-12.3743	7.54008	22.0154	2.70466e-06	0.0166467
3' UTR	chr18	-	70410991	70416261	NETO1	X	0	4	0	4	0	1	0	0	0	2	0	9	-12.5865	7.21485	18.0987	2.09748e-05	0.0342599
3' UTR	chr19	-	19625028	19625413	TSSK6	X	2	11	0	13	3	13	0	5	3	18	3	11	-11.2631	2.73786	18.6667	1.55682e-05	0.0342599
3' UTR	chr22	-	51205920	51207202	RABL2B	X	11	0	4	0	2	0	0	0	0	0	3	0	-12.7067	-7.5353	20.2683	6.73053e-06	0.0177537
Intergenic	chr1		3163970	3164643		O	4	13	0	7	1	24	5	9	0	9	0	6	-10.0394	3.02238	18.2578	1.9293e-05	0.0212509
Intergenic	chr1		156046344	156047384		O	10	27	5	34	11	27	8	26	13	33	12	16	-8.99365	1.53294	15.8853	6.72986e-05	0.0487685
Intergenic	chr3		184320006	184320218		O	26	3	13	0	33	17	23	1	20	7	21	13	-9.18863	-1.83094	18.0927	2.10407e-05	0.0222845
Intergenic	chr4		13543563	13546494		O	12	12	3	29	5	19	2	22	1	13	3	6	-9.54306	2.10857	17.1659	3.42537e-05	0.0285831
Intergenic	chr5		1874908	1879032		O	7	20	1	74	2	8	12	23	3	13	5	11	-9.28361	2.28722	24.0796	9.24321e-07	0.00282811
Intergenic	chr5		3594468	3603054		O	18	79	17	107	31	77	41	53	21	99	22	58	-7.96972	1.70385	32.7099	1.0699e-08	0.000147309
Intergenic	chr6		106441987	106442912		O	0	11	0	11	0	10	1	0	0	3	0	0	-10.8534	8.33539	18.2666	1.92048e-05	0.0212509
Intergenic	chr6		150284683	150286515		O	0	5	0	23	0	2	1	0	0	3	0	2	-10.888	8.25334	17.936	2.28459e-05	0.0233003
Intergenic	chr7		98990158	98990922		O	6	16	0	5	0	16	1	5	0	7	0	1	-10.3399	3.58262	15.8869	6.72417e-05	0.0487685
Intergenic	chr8		23562476	23565175		O	7	49	3	42	5	29	14	11	13	13	6	16	-9.07557	1.75205	17.8453	2.39605e-05	0.0235643
Intergenic	chr8		145938493	145939708		O	2	18	11	74	0	12	8	20	2	21	5	18	-9.20655	2.65292	34.2617	4.81763e-09	0.000132663
Intergenic	chr9		13278313	13279805		O	0	2	0	7	0	12	1	10	0	5	0	2	-10.7396	8.61404	21.1312	4.28885e-06	0.00694718
Intergenic	chr11		1311352	1311619		O	5	17	1	10	0	8	1	5	2	14	3	14	-9.99106	2.72427	16.6491	4.49711e-05	0.0363792
Intergenic	chr11		31825744	31826967		O	0	15	0	15	0	7	1	0	0	3	0	2	-10.663	8.51978	23.3925	1.32094e-06	0.00327271
Intergenic	chr11		69517841	69519929		O	1	11	0	12	0	5	1	3	0	6	0	2	-10.6702	4.57402	17.2884	3.21149e-05	0.0285831
Intergenic	chr11		112832525	112834490		O	2	13	3	24	0	13	1	6	0	0	0	6	-10.2081	3.54156	18.9701	1.32784e-05	0.0174117
Intergenic	chr12		101109864	101111622		O	1	11	0	14	2	33	6	12	3	15	4	6	-9.73957	2.55985	19.6357	9.37037e-06	0.0129016
Intergenic	chr14		57260879	57262123		O	0	13	1	17	5	5	1	19	0	6	0	7	-10.0823	3.63005	22.0067	2.71706e-06	0.00575537
Intergenic	chr14		95240084	95240341		O	0	5	0	6	0	10	0	4	0	4	0	1	-11.0036	8.66285	17.1727	3.41313e-05	0.0285831
Intergenic	chr19		34112280	34114353		O	0	3	0	24	2	3	1	5	0	7	0	6	-10.4959	4.201	18.45	1.74422e-05	0.0212509

## Sheet: Sheet2
5_UTR	chr1	-	1310138	1310562	AURKAIP1	exclusion	0	0	8	0	0	0	0	0	0	0	1	0	-14.7084	-5.70048	13.4772	0.000241474	0.0324251
5_UTR	chr1	-	1310138	1310580	AURKAIP1	exclusion	0	0	8	0	0	0	0	0	0	0	1	0	-14.7084	-5.70048	13.4772	0.000241474	0.0324251
5_UTR	chr1	-	3663337	3663335	TP73-AS1	exclusion	0	3	0	1	0	1	0	0	0	7	0	0	-14.423	6.00025	14.4829	0.000141435	0.0256031
5_UTR	chr1	+	11714432	11715891	FBXO44	exclusion	0	1	0	1	0	3	1	0	0	7	0	3	-14.0792	3.74282	12.2491	0.000465487	0.0464593
5_UTR	chr1	+	34642553	34643389	C1orf94	exclusion	1	6	2	26	2	6	0	0	0	5	4	3	-12.8196	2.18257	16.411	5.09891e-05	0.01563
5_UTR	chr1	-	50887210	50889141	DMRTA2	Inclusion	6	17	13	30	5	30	0	2	5	18	6	16	-11.8909	1.73055	24.7067	6.67512e-07	0.00119019
5_UTR	chr1	+	55464617	55464858	BSND	exclusion	4	7	0	11	0	2	1	2	0	0	1	8	-13.2198	2.15378	12.3691	0.000436496	0.0446519
5_UTR	chr1	+	67632169	67633802	IL23R	exclusion	12	2	21	6	21	13	33	13	13	16	10	3	-11.8001	-1.15032	13.8794	0.00019492	0.0298846
5_UTR	chr1	+	95286100	95290056	SLC44A3	exclusion	0	4	0	10	0	1	0	6	4	10	0	11	-13.0319	3.27564	27.4855	1.58276e-07	0.000343821
5_UTR	chr1	-	109968954	109969070	PSMA5	exclusion	0	0	6	0	0	0	0	0	0	0	5	0	-14.601	-6.01173	15.7102	7.38267e-05	0.0185283
5_UTR	chr1	-	151137736	151138370	LYSMD1	exclusion	16	4	17	1	13	8	0	0	4	2	5	5	-12.5744	-1.52144	13.1855	0.000282118	0.0332668
5_UTR	chr1	+	152956564	152957705	SPRR1A	exclusion	0	13	0	5	0	4	0	0	2	0	0	1	-13.5916	3.35314	16.3278	5.32763e-05	0.01563
5_UTR	chr1	-	165324798	165325478	LMX1A	exclusion	0	10	0	14	4	4	0	1	2	0	0	2	-13.197	2.12294	12.2035	0.000477009	0.0471297
5_UTR	chr1	+	171308035	171310462	TOP1P1	exclusion	0	6	0	0	0	1	0	0	0	5	0	0	-14.4234	5.89109	14.3004	0.000155836	0.0270181
5_UTR	chr1	+	179560748	179561749	TDRD5	exclusion	7	0	0	19	2	6	0	4	0	8	3	10	-12.7826	1.78681	13.4345	0.000247033	0.0324251
5_UTR	chr1	+	179560757	179561749	TDRD5	exclusion	7	0	0	19	2	6	0	4	0	8	3	10	-12.7826	1.78681	13.4345	0.000247033	0.0324251
5_UTR	chr1	+	179560989	179561749	TDRD5	exclusion	7	0	0	17	2	6	0	4	0	8	3	10	-12.8276	1.72957	12.4456	0.000418968	0.0435428
5_UTR	chr1	+	181452686	181452879	CACNA1E	exclusion	2	12	1	10	2	4	1	0	0	10	1	0	-13.1338	2.09698	13.2734	0.000269203	0.033057
5_UTR	chr1	+	212797789	212798218	FAM71A	exclusion	3	2	2	12	0	8	0	0	0	8	0	1	-13.2429	2.4003	14.4544	0.000143591	0.0257412
5_UTR	chr1	-	228602775	228604583	TRIM17	exclusion	19	50	52	130	59	71	20	58	72	95	38	45	-10.3189	0.806844	12.5689	0.000392216	0.0422278
5_UTR	chr1	-	235490236	235491532	ARID4B	exclusion	1	0	4	0	2	0	0	0	4	0	4	2	-14.13	-3.22712	12.4959	0.000407851	0.0431563
5_UTR	chr1	+	245133171	245133719	EFCAB2	exclusion	4	2	6	0	6	0	0	0	0	0	2	0	-13.9058	-3.58272	17.4295	2.98162e-05	0.0124317
5_UTR	chr2	+	26624784	26624856	CCDC164	exclusion	0	4	0	8	0	0	0	1	0	0	0	0	-14.2169	5.33514	13.9561	0.000187134	0.0294072
5_UTR	chr2	-	38302533	38303323	CYP1B1	exclusion	0	6	0	6	0	6	0	0	0	0	3	4	-13.5976	3.22865	14.906	0.000113006	0.0241224
5_UTR	chr2	-	65357051	65357435	RAB1A	exclusion	2	0	6	1	0	1	0	0	2	0	6	0	-14.0704	-3.31368	13.7248	0.000211641	0.0306498
5_UTR	chr2	+	71205575	71205774	ANKRD53	exclusion	5	0	2	0	0	0	0	0	3	0	2	0	-14.4207	-6.45733	16.3784	5.1872e-05	0.01563
5_UTR	chr2	-	75426062	75426645	TACR1	exclusion	0	2	0	8	0	0	0	2	0	0	0	2	-14.1537	5.58599	14.7669	0.000121652	0.0243499
5_UTR	chr2	+	85811531	85811612	VAMP5	exclusion	0	3	0	6	0	1	0	0	0	4	0	0	-14.2115	5.97149	15.8662	6.79812e-05	0.0179718
5_UTR	chr2	+	96991069	96992392	ITPRIPL1	exclusion	2	12	1	9	0	7	0	4	2	3	4	5	-12.9596	2.14142	16.3348	5.30804e-05	0.01563
5_UTR	chr2	-	114035973	114036498	PAX8	exclusion	15	21	9	40	9	24	2	16	6	9	13	13	-11.7154	1.17249	14.048	0.0001782	0.0286824
5_UTR	chr2	+	124782864	124783226	CNTNAP5	exclusion	2	6	0	12	2	4	0	1	2	3	0	3	-13.2437	2.10367	12.0697	0.000512491	0.0491818
5_UTR	chr2	+	201676269	201677939	BZW1	exclusion	1	4	13	1	4	4	11	0	7	0	7	2	-12.9264	-1.86583	15.7164	7.35849e-05	0.0185283
5_UTR	chr2	-	208633465	208634143	FZD5	exclusion	0	4	0	1	0	5	0	0	0	0	0	4	-14.1501	5.98728	15.8604	6.81922e-05	0.0179718
5_UTR	chr2	-	223163336	223163715	PAX3	exclusion	2	9	0	6	0	1	0	0	0	3	0	0	-13.7854	3.13694	13.1811	0.000282785	0.0332668
5_UTR	chr3	+	9791628	9791969	OGG1	exclusion	2	0	8	0	0	0	0	0	0	0	0	0	-14.6041	-6.23691	14.6831	0.000127181	0.0243499
5_UTR	chr3	+	12525931	12531298	TSEN2	exclusion	4	4	0	6	9	12	0	2	0	17	3	9	-12.6997	1.67489	13.3584	0.000257265	0.0324251
5_UTR	chr3	+	12526010	12531298	TSEN2	exclusion	4	4	0	6	9	12	0	2	0	17	3	9	-12.6997	1.67489	13.3584	0.000257265	0.0324251
5_UTR	chr3	+	19190017	19190210	KCNH8	exclusion	0	8	0	3	0	1	0	0	0	0	0	4	-14.0298	5.96946	18.5277	1.67453e-05	0.00936952
5_UTR	chr3	+	39371197	39373821	CCR8	exclusion	16	4	21	9	18	4	16	21	13	6	23	7	-11.8298	-1.1685	14.4101	0.000147015	0.0261014
5_UTR	chr3	-	42845685	42845934	HIGD1A	exclusion	4	1	3	0	8	4	0	0	11	0	5	3	-13.2378	-1.92334	12.0471	0.000518719	0.0496263
5_UTR	chr3	-	105586423	105587887	CBLB	exclusion	0	4	0	4	0	2	0	0	0	0	0	2	-14.2834	5.98373	14.116	0.000171875	0.0286758
5_UTR	chr3	+	147127181	147127898	ZIC1	exclusion	1	11	5	17	5	29	2	5	12	7	7	15	-12.1361	1.48561	16.3035	5.39643e-05	0.01563
5_UTR	chr3	-	170625597	170626426	EIF5A2	exclusion	1	6	0	2	0	10	0	0	3	4	0	6	-13.37	2.64512	15.2439	9.44802e-05	0.0212748
5_UTR	chr3	-	187419918	187420345	RTP2	exclusion	13	2	15	2	0	0	0	0	0	0	0	1	-13.4109	-2.46222	13.1676	0.000284829	0.0332668
5_UTR	chr3	+	190105661	190105907	CLDN16	exclusion	1	2	0	9	0	3	0	0	0	0	0	4	-13.8411	3.72521	13.6207	0.000223711	0.0312933
5_UTR	chr3	-	194119013	194119995	GP5	exclusion	0	6	0	6	0	5	0	0	2	3	1	2	-13.6283	2.64189	12.1635	0.000487344	0.0478647
5_UTR	chr4	+	6675821	6677773	LOC93622	exclusion	2	8	0	18	0	11	3	6	2	5	5	3	-12.7075	2.09552	18.9466	1.34429e-05	0.00853602
5_UTR	chr4	-	54424134	54424436	LNX1	exclusion	0	14	2	8	0	6	0	1	1	0	3	2	-13.2393	2.38104	14.1289	0.000170699	0.0286534
5_UTR	chr4	-	57522168	57522688	HOPX	exclusion	0	11	0	5	1	0	0	0	1	13	0	1	-13.4401	3.79586	22.5789	2.0169e-06	0.0027586
5_UTR	chr4	+	95128759	95129544	SMARCAD1	exclusion	0	0	0	0	8	0	0	0	0	0	2	0	-14.6012	-6.33863	15.4832	8.32436e-05	0.0192131
5_UTR	chr4	+	109541722	109543114	RPL34	exclusion	0	0	0	4	0	0	0	0	0	7	0	2	-14.3472	5.67702	13.9817	0.000184595	0.0291321
5_UTR	chr4	+	109541749	109543114	RPL34	exclusion	0	0	0	4	0	0	0	0	0	7	0	2	-14.3472	5.67702	13.9817	0.000184595	0.0291321
5_UTR	chr4	+	110736666	110737319	GAR1	exclusion	1	0	13	1	12	0	0	0	1	0	3	0	-13.5306	-4.31224	29.5166	5.54412e-08	0.000186126
5_UTR	chr4	-	122683040	122686340	TMEM155	exclusion	0	14	9	34	11	20	5	2	7	13	8	17	-11.9446	1.28911	14.1597	0.000167929	0.0283171
5_UTR	chr5	-	850719	851101	ZDHHC11	exclusion	5	5	1	16	1	4	0	4	0	5	0	5	-12.9867	2.33047	17.6639	2.63575e-05	0.012167
5_UTR	chr5	+	33936491	33936844	RXFP3	Inclusion	1	1	0	12	0	3	1	0	0	8	0	1	-13.5583	3.36469	16.4443	5.00998e-05	0.01563
5_UTR	chr5	-	37834900	37839782	GDNF	exclusion	14	17	3	31	16	34	5	3	5	13	6	16	-11.7915	1.21844	14.0434	0.000178639	0.0286824
5_UTR	chr5	+	42756920	42759222	CCDC152	exclusion	12	32	5	10	3	10	3	2	0	8	3	7	-12.3316	1.48455	13.6225	0.000223486	0.0312933
5_UTR	chr5	-	52403006	52405325	MOCS2	exclusion	0	5	0	3	1	2	0	7	1	4	1	3	-13.5843	2.75984	13.879	0.00019496	0.0298846
5_UTR	chr5	+	63986135	63986449	FAM159B	exclusion	0	0	0	1	0	10	0	1	0	0	0	5	-13.8864	5.61651	17.996	2.21372e-05	0.010707
5_UTR	chr5	-	75919057	75919240	F2RL2	exclusion	0	8	0	0	0	2	0	4	0	0	0	0	-14.2069	5.6741	16.0029	6.32468e-05	0.0170286
5_UTR	chr5	-	112630084	112630612	MCC	exclusion	0	2	0	2	0	7	0	0	0	0	0	2	-14.2177	5.55515	13.8997	0.000192825	0.0298846
5_UTR	chr5	-	115152096	115152405	CDO1	Inclusion	0	5	0	5	0	1	0	0	0	5	0	2	-14.026	6.46844	20.067	7.47755e-06	0.00778183
5_UTR	chr5	-	121413682	121414055	LOX	exclusion	0	3	0	4	0	2	0	0	0	0	0	2	-14.3576	5.8343	12.9118	0.000326521	0.0372163
5_UTR	chr5	-	134724785	134734928	H2AFY	exclusion	2	38	3	14	17	25	1	5	11	13	17	29	-11.7252	1.36791	18.0989	2.0972e-05	0.0106092
5_UTR	chr5	-	134724785	134735577	H2AFY	exclusion	2	40	3	17	20	26	1	5	16	14	22	30	-11.6198	1.19372	14.8435	0.000116809	0.0243499
5_UTR	chr5	+	140535580	140537989	PCDHB17	exclusion	18	24	2	20	2	17	0	0	7	8	0	12	-12.1582	1.57757	17.0395	3.66104e-05	0.0129999
5_UTR	chr5	+	140613938	140617100	PCDHB18	exclusion	8	11	3	23	5	10	3	9	4	14	8	6	-12.243	1.29366	12.2877	0.000455943	0.0458788
5_UTR	chr5	-	142779401	142783254	NR3C1	exclusion	0	0	0	3	0	1	0	0	0	7	0	5	-14.0246	6.10284	18.8556	1.41e-05	0.00853602
5_UTR	chr5	-	142779416	142783254	NR3C1	exclusion	0	0	0	3	0	1	0	0	0	7	0	5	-14.0246	6.10284	18.8556	1.41e-05	0.00853602
5_UTR	chr5	-	142779461	142783254	NR3C1	exclusion	0	0	0	3	0	1	0	0	0	7	0	5	-14.0246	6.10284	18.8556	1.41e-05	0.00853602
5_UTR	chr5	-	142780406	142784045	NR3C1	exclusion	0	0	0	3	0	3	0	0	0	0	0	6	-14.2855	5.53619	12.3531	0.000440264	0.0447056
5_UTR	chr5	-	153857570	153857824	HAND1	exclusion	0	4	0	0	0	1	0	4	0	0	0	2	-14.4303	5.95973	12.9804	0.000314772	0.0363257
5_UTR	chr5	-	159738932	159739573	CCNJL	exclusion	0	4	0	0	0	1	0	6	0	0	0	0	-14.4298	5.57703	12.7013	0.000365396	0.0400407
5_UTR	chr5	+	172386439	172386875	RPL26L1	exclusion	0	10	2	13	0	3	2	0	0	0	0	2	-13.3496	2.53455	13.4599	0.000243717	0.0324251
5_UTR	chr5	-	176827579	176827637	PFN3	exclusion	4	6	1	19	0	5	3	7	3	8	3	3	-12.7601	1.75998	13.8705	0.000195852	0.0298846
5_UTR	chr5	+	176873796	176882067	PRR7	exclusion	35	18	9	50	13	42	5	13	18	34	25	54	-11.1149	1.02315	14.5288	0.000138035	0.0254672
5_UTR	chr5	+	176875326	176882067	PRR7	exclusion	35	18	9	51	14	44	6	13	17	34	25	53	-11.1288	1.02172	14.4289	0.000145552	0.0259666
5_UTR	chr6	+	12012724	12015860	HIVEP1	exclusion	0	2	0	6	2	5	0	0	0	8	0	1	-13.6995	3.23367	14.4627	0.00014296	0.0257412
5_UTR	chr6	-	29012954	29012952	OR2W1	exclusion	8	0	5	1	5	1	2	0	2	0	3	1	-13.5384	-2.66236	16.5909	4.6373e-05	0.0151872
5_UTR	chr6	-	33748879	33754719	LEMD2	exclusion	17	35	16	64	14	51	6	1	20	31	14	18	-11.2413	1.09916	15.2825	9.25706e-05	0.0210426
5_UTR	chr6	+	37137922	37138350	PIM1	exclusion	0	0	0	0	4	0	0	0	0	0	4	0	-14.8248	-6.05001	12.8074	0.000345255	0.0387535
5_UTR	chr6	-	84417648	84419127	SNAP91	exclusion	4	2	4	23	0	13	0	2	2	0	0	4	-12.8134	1.827	12.387	0.000432343	0.04435
5_UTR	chr6	+	101846861	101847152	GRIK2	exclusion	0	2	0	10	0	0	0	1	0	4	0	0	-14.0338	5.62803	17.3991	3.02975e-05	0.0124317
5_UTR	chr6	-	105581454	105584221	BVES	exclusion	0	4	0	1	0	1	0	0	0	2	0	2	-14.4299	6.35116	13.6838	0.000216311	0.0309618
5_UTR	chr6	-	105581454	105584543	BVES	exclusion	0	4	0	1	0	1	0	0	0	2	0	2	-14.4299	6.35116	13.6838	0.000216311	0.0309618
5_UTR	chr6	-	105581454	105585049	BVES	exclusion	0	4	0	1	0	1	0	0	0	2	0	2	-14.4299	6.35116	13.6838	0.000216311	0.0309618
5_UTR	chr6	-	109703583	109703762	CD164	exclusion	0	0	0	0	6	0	2	0	2	0	0	0	-14.6019	-6.10093	14.6529	0.000129237	0.0243499
5_UTR	chr6	-	111887756	111888521	TRAF3IP2	exclusion	8	3	0	19	0	7	0	0	0	3	0	4	-13.0346	1.98353	12.3923	0.000431099	0.0443456
5_UTR	chr6	-	146127543	146135921	FBXO30	exclusion	0	12	2	15	9	17	9	9	9	17	6	8	-12.1536	1.25538	12.5442	0.00039743	0.0425412
5_UTR	chr7	-	751144	752161	PRKAR1B	exclusion	7	4	8	23	2	20	2	8	7	21	6	3	-12.1907	1.29465	12.274	0.000459315	0.0460925
5_UTR	chr7	-	751144	752577	PRKAR1B	exclusion	7	7	8	27	2	23	2	8	8	23	6	3	-12.072	1.46795	16.6014	4.61162e-05	0.0151872
5_UTR	chr7	-	7572508	7575460	COL28A1	exclusion	0	0	0	1	0	12	0	0	0	0	0	3	-13.9874	5.24509	15.2762	9.28794e-05	0.0210426
5_UTR	chr7	+	16566505	16566576	LOC100506049	exclusion	1	5	2	9	1	10	0	1	3	6	0	2	-13.1456	2.06943	12.9462	0.000320567	0.0368104
5_UTR	chr7	+	24323807	24324858	NPY	exclusion	2	2	2	13	2	10	0	4	0	4	0	3	-13.0893	2.31936	15.6419	7.65395e-05	0.0185809
5_UTR	chr7	-	27196166	27196296	HOXA7	exclusion	0	2	0	8	0	5	0	0	0	4	0	0	-13.8834	5.96808	20.3495	6.45114e-06	0.00700689
5_UTR	chr7	+	27282164	27282648	EVX1	exclusion	0	8	0	19	0	2	0	0	1	5	1	2	-13.1988	3.84795	25.4667	4.50087e-07	0.000923404
5_UTR	chr7	-	35293233	35293711	TBX20	exclusion	0	5	0	13	0	1	1	0	0	3	0	1	-13.672	4.17866	17.9637	2.25164e-05	0.010707
5_UTR	chr7	-	36763755	36764154	AOAH	exclusion	0	10	0	9	1	11	0	2	4	4	4	5	-12.9248	2.18768	17.2484	3.27979e-05	0.0124865
5_UTR	chr7	+	86974951	86978383	CROT	exclusion	0	2	0	1	0	10	0	0	0	0	0	0	-14.1555	5.23916	13.631	0.000222483	0.0312933
5_UTR	chr7	-	128000047	128001739	PRRT4	exclusion	23	15	24	17	69	35	48	32	49	23	64	31	-10.8169	-0.850347	12.3514	0.000440652	0.0447056
5_UTR	chr8	-	37823989	37824184	ADRB3	exclusion	0	2	0	4	0	5	0	0	0	1	0	3	-14.0921	6.16085	16.8225	4.10438e-05	0.0142991
5_UTR	chr8	-	49647712	49647870	EFCAB1	exclusion	0	2	0	4	0	0	0	0	0	2	0	3	-14.4323	5.93241	12.6395	0.000377681	0.0411427
5_UTR	chr8	+	65285775	65291385	LOC100130155	exclusion	16	20	20	73	27	57	5	19	9	16	18	25	-11.1357	1.0755	15.5498	8.0362e-05	0.0186647
5_UTR	chr8	+	65289884	65291385	LOC100130155	exclusion	2	12	5	28	11	24	0	5	5	13	10	11	-12.0425	1.53418	18.4211	1.77084e-05	0.0097605
5_UTR	chr8	-	67874002	67874825	TCF24	exclusion	0	2	0	12	0	0	0	2	0	0	0	2	-13.9355	5.60162	17.4908	2.88695e-05	0.0124317
5_UTR	chr8	-	72267142	72268979	EYA1	exclusion	0	4	0	0	0	1	0	0	0	6	0	0	-14.6035	5.83832	12.4317	0.000422116	0.0435428
5_UTR	chr8	-	72267142	72274467	EYA1	exclusion	2	10	0	3	0	1	0	2	0	8	0	0	-13.6509	3.52106	18.0196	2.18641e-05	0.010707
5_UTR	chr8	-	72756415	72756731	MSC	exclusion	0	3	0	5	0	1	0	0	0	0	0	4	-14.2156	5.83322	14.6168	0.000131738	0.0246952
5_UTR	chr8	-	91992665	91997485	LOC100127983	exclusion	2	2	2	11	2	9	3	9	4	10	3	9	-12.6799	1.62178	13.166	0.000285067	0.0332668
5_UTR	chr8	-	93074782	93107490	RUNX1T1	exclusion	50	123	39	105	75	66	28	37	39	98	39	96	-10.2073	0.916152	16.6344	4.53206e-05	0.0151872
5_UTR	chr8	-	93074782	93107882	RUNX1T1	exclusion	51	136	43	128	101	83	35	40	48	98	64	108	-10.061	0.794409	12.9395	0.000321723	0.0368104
5_UTR	chr8	-	93088282	93107490	RUNX1T1	exclusion	25	75	29	56	53	52	18	29	31	47	23	65	-10.6729	0.874921	13.4111	0.00025014	0.0324251
5_UTR	chr8	+	96085142	96085220	MIR3150A	exclusion	0	7	0	13	0	0	0	0	0	8	3	2	-13.3955	3.59117	20.8595	4.94239e-06	0.00570367
5_UTR	chr8	-	96085226	96085224	MIR3150B	exclusion	0	5	0	11	0	0	0	0	0	6	1	1	-13.7027	4.11677	18.1046	2.09091e-05	0.0106092
5_UTR	chr8	+	99439250	99440206	KCNS2	exclusion	1	9	0	39	0	2	0	0	0	0	0	0	-12.8872	4.86665	34.0204	5.45379e-09	3.35672e-05
5_UTR	chr8	+	99956631	99961179	OSR2	exclusion	6	57	15	66	2	19	2	0	8	28	14	6	-11.4524	1.74437	28.9287	7.50939e-08	0.000213319
5_UTR	chr8	+	110346552	110348364	ENY2	exclusion	0	4	0	4	0	0	0	13	0	4	0	7	-13.3663	7.055	35.1428	3.06399e-09	3.35672e-05
5_UTR	chr8	+	126010720	126011644	SQLE	exclusion	0	4	0	1	0	5	0	0	0	0	0	2	-14.3556	5.77042	13.077	0.000298945	0.0346074
5_UTR	chr8	-	132052581	132052835	ADCY8	exclusion	0	0	0	12	0	1	0	2	0	0	0	0	-14.0427	5.28446	14.2289	0.000161868	0.0276742
5_UTR	chr8	+	135610314	135612931	ZFAT-AS1	exclusion	15	39	10	31	5	19	0	0	11	16	7	13	-11.7817	1.2894	15.106	0.000101642	0.0226117
5_UTR	chr8	-	142368025	142377365	GPR20	exclusion	68	141	111	423	52	113	29	51	78	81	64	76	-9.75055	0.90975	17.2567	3.26552e-05	0.0124865
5_UTR	chr8	-	143747479	143751401	JRK	exclusion	33	121	58	237	51	68	69	84	70	151	84	61	-9.91378	0.892626	16.542	4.75838e-05	0.0152802
5_UTR	chr8	-	144812754	144815914	FAM83H	exclusion	16	52	4	54	11	19	18	14	31	54	30	31	-11.0759	1.00361	14.5152	0.000139037	0.0254672
5_UTR	chr8	-	144904067	144911196	PUF60	exclusion	58	95	42	109	52	64	25	42	57	115	35	44	-10.2907	0.782628	12.1126	0.000500825	0.0483432
5_UTR	chr8	-	145652330	145653927	VPS28	exclusion	12	28	11	39	8	12	13	20	20	61	12	17	-11.3675	1.16839	17.1632	3.43025e-05	0.0126676
5_UTR	chr9	+	71788971	71789287	TJP2	exclusion	0	0	0	15	0	3	0	0	0	0	0	0	-13.8487	5.11991	16.3057	5.39017e-05	0.01563
5_UTR	chr9	+	97847727	97847822	MIR27B	exclusion	0	3	0	5	0	6	0	0	0	6	1	1	-13.7852	4.09778	17.0451	3.65029e-05	0.0129999
5_UTR	chr9	-	99538353	99540328	ZNF510	exclusion	25	6	24	9	34	3	10	17	26	21	27	20	-11.4995	-1.02463	13.2801	0.000268242	0.033057
5_UTR	chr9	-	104500263	104500862	GRIN3A	exclusion	0	3	0	3	0	3	0	0	0	5	0	2	-14.0843	6.56749	18.7298	1.50614e-05	0.00869066
5_UTR	chr9	-	116859984	116861337	KIF12	exclusion	0	11	0	4	2	8	0	2	2	6	2	6	-13.0939	2.74753	21.0988	4.36211e-06	0.0051964
5_UTR	chr9	-	123688355	123689173	TRAF1	exclusion	2	0	4	1	1	0	0	0	3	0	2	0	-14.3404	-3.92736	12.8687	0.000334131	0.0379665
5_UTR	chr9	+	127054250	127055218	NEK6	exclusion	10	0	12	5	11	1	0	1	4	3	10	5	-12.7901	-1.70004	14.5022	0.000139994	0.0254672
5_UTR	chr9	-	130953138	130953868	CIZ1	exclusion	7	5	11	2	10	4	0	0	14	4	28	9	-12.3625	-1.54303	15.5873	7.87817e-05	0.0185809
5_UTR	chr9	+	131218679	131219683	ODF2	exclusion	6	0	0	0	2	0	0	0	4	0	0	0	-14.4219	-5.92966	14.8698	0.000115193	0.0241702
5_UTR	chr9	+	131219186	131219683	ODF2	exclusion	6	0	0	0	2	0	0	0	4	0	0	0	-14.4219	-5.92966	14.8698	0.000115193	0.0241702
5_UTR	chr9	+	134378289	134381539	POMT1	exclusion	37	10	26	25	28	19	46	24	37	19	37	15	-11.1099	-0.930157	13.4247	0.000248334	0.0324251
5_UTR	chr9	+	139640613	139644362	LOC100128593	exclusion	78	30	126	82	96	71	94	32	76	44	99	87	-10.0737	-0.818564	14.1104	0.000172386	0.0286758
5_UTR	chr9	+	140122018	140122786	RNF224	exclusion	4	8	21	4	10	1	0	0	2	0	15	3	-12.6743	-1.69245	14.7311	0.000123982	0.0243499
5_UTR	chr10	+	22634399	22634539	SPAG6	exclusion	0	1	0	11	0	0	0	0	0	1	0	0	-14.2199	5.02901	12.5194	0.000402741	0.0428612
5_UTR	chr10	+	26505236	26505737	GAD2	exclusion	0	2	0	18	0	3	0	2	0	4	0	5	-13.3033	6.6021	34.3592	4.58227e-09	3.35672e-05
5_UTR	chr10	+	35464524	35464629	CREM	exclusion	0	6	0	2	0	1	1	1	0	3	0	3	-14.0814	3.75379	12.46	0.000415762	0.0435428
5_UTR	chr10	+	50817141	50824614	CHAT	exclusion	6	20	29	108	17	57	4	3	26	25	31	40	-11.0104	1.05585	14.8273	0.000117815	0.0243499
5_UTR	chr10	+	50887684	50887742	C10orf53	exclusion	0	0	0	8	0	1	0	0	0	4	0	0	-14.2836	5.45665	13.2655	0.000270335	0.033057
5_UTR	chr11	+	1244295	1244352	MUC5B	exclusion	4	0	0	0	4	0	0	0	1	0	2	0	-14.5076	-6.57406	16.1812	5.75619e-05	0.0162268
5_UTR	chr11	-	2291564	2292182	ASCL2	exclusion	0	2	0	36	0	0	0	2	0	9	5	3	-12.8382	3.19672	24.3606	7.98842e-07	0.00134093
5_UTR	chr11	+	24518556	24518788	LUZP2	exclusion	0	1	0	16	0	0	0	0	0	0	0	0	-13.991	4.91593	13.8629	0.000196646	0.0298846
5_UTR	chr11	-	30601922	30607930	MPPED2	exclusion	15	24	9	58	15	46	15	16	9	24	11	31	-11.2784	1.35433	23.5639	1.2083e-06	0.00185923
5_UTR	chr11	+	32457285	32461619	WT1-AS	exclusion	8	17	2	41	2	23	3	2	0	3	6	18	-12.0205	2.26145	32.6103	1.12617e-08	5.94119e-05
5_UTR	chr11	+	43918853	43921423	LOC729799	exclusion	12	6	4	27	2	10	1	5	0	10	0	5	-12.4476	1.59924	14.51	0.00013942	0.0254672
5_UTR	chr11	+	46383145	46387805	DGKZ	exclusion	17	42	17	38	13	21	8	6	6	44	15	17	-11.3978	1.09864	14.8917	0.00011386	0.0241651
5_UTR	chr11	-	49228404	49230222	FOLH1	exclusion	0	0	0	5	0	3	0	2	2	5	0	13	-13.4585	3.47449	18.7392	1.49871e-05	0.00869066
5_UTR	chr11	-	49229963	49230222	FOLH1	exclusion	0	0	0	1	0	0	0	0	0	4	0	8	-14.2759	5.41907	13.4052	0.000250922	0.0324251
5_UTR	chr11	+	61100654	61102199	DAK	exclusion	7	8	0	14	0	13	0	0	0	6	0	3	-12.8989	2.55577	21.7382	3.12514e-06	0.00397959
5_UTR	chr11	-	62341316	62341460	EEF1G	exclusion	2	0	2	0	4	0	0	0	0	0	2	0	-14.6026	-6.67873	16.1116	5.9716e-05	0.016331
5_UTR	chr11	-	62782432	62783317	SLC22A8	exclusion	37	35	43	66	23	48	8	11	13	55	18	47	-10.8928	0.904563	12.7263	0.000360552	0.0399086
5_UTR	chr11	+	63275459	63276071	LGALS12	exclusion	1	9	0	5	1	4	1	4	0	2	0	3	-13.4285	2.99418	17.2552	3.2681e-05	0.0124865
5_UTR	chr11	-	64577583	64578035	MEN1	exclusion	2	0	5	1	1	0	2	0	4	0	2	0	-14.0138	-3.41536	14.9628	0.000109651	0.0235424
5_UTR	chr11	-	64577583	64578188	MEN1	exclusion	2	0	5	1	1	0	2	0	4	0	2	0	-14.0138	-3.41536	14.9628	0.000109651	0.0235424
5_UTR	chr11	-	64577583	64578213	MEN1	exclusion	2	0	5	1	1	0	2	0	4	0	2	0	-14.0138	-3.41536	14.9628	0.000109651	0.0235424
5_UTR	chr11	-	71822324	71823822	C11orf51	exclusion	0	6	0	9	2	5	0	0	0	0	3	7	-13.376	2.45622	12.7849	0.000349423	0.0391026
5_UTR	chr11	+	85566144	85576165	CCDC83	exclusion	14	28	5	19	3	9	16	21	13	25	8	25	-11.6723	1.19688	15.5822	7.8995e-05	0.0185809
5_UTR	chr11	+	92702789	92702890	MTNR1B	exclusion	2	4	5	15	1	15	1	2	1	3	0	3	-12.8682	1.81224	12.4351	0.000421339	0.0435428
5_UTR	chr11	+	131780712	131781374	NTM	exclusion	2	5	0	9	0	6	0	0	0	3	0	3	-13.4673	3.45084	19.2098	1.1711e-05	0.00847993
5_UTR	chr12	+	4918342	4919206	KCNA6	exclusion	0	6	0	12	3	9	5	3	1	4	3	6	-12.9084	1.75475	12.2309	0.00047004	0.0467873
5_UTR	chr12	-	21926552	21927747	KCNJ8	exclusion	0	18	2	19	4	8	0	1	2	5	4	3	-12.6464	2.04965	18.548	1.65677e-05	0.00936952
5_UTR	chr12	-	45270510	45270633	NELL2	exclusion	0	6	0	1	0	0	0	2	0	0	0	1	-14.5166	5.76658	12.135	0.000494835	0.0480885
5_UTR	chr12	-	49075417	49076035	C12orf41	exclusion	0	0	4	0	2	0	0	0	2	0	0	0	-14.8268	-6.23575	12.2675	0.00046091	0.0461272
5_UTR	chr12	+	53894705	53895807	TARBP2	exclusion	0	0	0	4	0	7	0	0	0	5	0	0	-14.0897	5.75338	16.4846	4.90468e-05	0.0156142
5_UTR	chr12	+	53895377	53895807	TARBP2	exclusion	0	0	0	4	0	7	0	0	0	2	0	0	-14.2174	5.49734	13.7361	0.000210369	0.0306498
5_UTR	chr12	+	56414689	56415276	IKZF4	exclusion	20	7	16	14	32	18	33	6	36	11	40	30	-11.3226	-1.1133	16.8905	3.95992e-05	0.0139272
5_UTR	chr12	-	57398703	57400297	ZBTB39	exclusion	0	11	0	11	5	10	0	0	0	2	3	2	-13.0634	2.1391	13.6368	0.000221793	0.0312933
5_UTR	chr12	+	65218352	65218658	TBC1D30	exclusion	0	0	0	9	0	4	0	0	0	0	0	0	-14.1597	5.01537	12.71	0.00036371	0.0399746
5_UTR	chr12	-	114841705	114846247	TBX5	exclusion	11	60	15	29	7	24	5	3	8	16	11	14	-11.5759	1.2577	16.5869	4.64717e-05	0.0151872
5_UTR	chr13	-	51417784	51417885	DLEU7	exclusion	1	7	0	2	1	6	0	1	0	3	0	2	-13.7427	3.19135	14.0645	0.000176643	0.0286824
5_UTR	chr13	+	76194570	76195828	LMO7	exclusion	0	6	0	1	0	0	0	2	0	0	0	3	-14.3505	5.90916	14.0701	0.000176126	0.0286824
5_UTR	chr13	+	114321597	114321700	GRK1	exclusion	3	4	0	12	0	9	0	2	2	3	1	3	-13.1765	2.18931	13.4942	0.000239302	0.0324251
5_UTR	chr13	-	114535664	114536714	GAS6	exclusion	12	40	22	30	8	17	0	2	3	31	13	8	-11.6708	1.16855	13.6412	0.000221279	0.0312933
5_UTR	chr14	-	24803860	24804277	ADCY4	exclusion	2	0	0	18	0	2	0	0	1	4	0	2	-13.4722	2.67729	12.1456	0.000492034	0.0479428
5_UTR	chr14	+	29241910	29247765	C14orf23	exclusion	4	14	15	30	2	30	3	2	3	3	10	23	-11.9332	1.41931	15.9913	6.36343e-05	0.0170286
5_UTR	chr14	+	37126773	37131293	PAX9	exclusion	0	20	2	34	5	5	3	4	1	15	4	9	-12.2438	2.56301	35.4228	2.65358e-09	3.35672e-05
5_UTR	chr14	-	57272176	57277184	OTX2	Inclusion	6	21	4	46	7	20	0	9	9	13	1	17	-11.7885	2.19435	39.205	3.81556e-10	1.40905e-05
5_UTR	chr14	-	94254066	94254766	PRIMA1	exclusion	3	21	4	40	25	7	2	9	8	30	13	16	-11.6923	1.1551	13.4819	0.000240877	0.0324251
5_UTR	chr14	+	101491901	101491987	MIR1197	exclusion	1	4	0	5	0	9	0	2	2	1	0	3	-13.5289	2.77558	14.0046	0.000182362	0.0290278
5_UTR	chr14	+	101531784	101531873	MIR412	exclusion	0	9	3	23	2	7	4	2	2	4	3	5	-12.6944	1.75701	13.8474	0.000198267	0.0299407
5_UTR	chr14	+	101531935	101532003	MIR369	exclusion	2	10	1	26	1	10	4	4	2	9	3	2	-12.5632	2.16957	21.7721	3.07038e-06	0.00397959
5_UTR	chr14	+	103995509	103996314	TRMT61A	exclusion	0	8	0	4	0	3	0	1	3	0	1	12	-13.3688	2.57083	14.3439	0.000152274	0.0267777
5_UTR	chr14	+	104583742	104583850	MIR203	exclusion	0	2	0	3	0	2	0	4	0	0	0	1	-14.2826	6.2253	14.3449	0.000152191	0.0267777
5_UTR	chr14	+	105155943	105167701	INF2	exclusion	105	115	57	174	56	94	10	33	43	87	58	55	-10.119	0.824049	13.3715	0.00025547	0.0324251
5_UTR	chr15	+	22955755	22956055	CYFIP1	exclusion	15	39	9	57	22	35	6	14	13	21	19	12	-11.3256	1.01783	13.2206	0.000276886	0.0332668
5_UTR	chr15	-	52861091	52861213	ARPP19	exclusion	0	0	6	0	2	0	0	0	3	0	6	1	-14.0664	-4.3926	18.9893	1.3145e-05	0.00853602
5_UTR	chr15	-	65502095	65503840	CILP	exclusion	2	10	21	12	21	2	7	0	11	5	23	8	-12.0936	-1.29492	14.1989	0.00016447	0.0279895
5_UTR	chr15	-	70994256	70994620	UACA	exclusion	6	0	4	0	6	1	2	2	2	0	0	0	-13.7683	-3.06813	16.2218	5.63417e-05	0.016129
5_UTR	chr15	+	75639331	75641245	NEIL1	exclusion	2	10	2	14	3	7	1	6	6	3	0	7	-12.7455	1.65139	12.8368	0.000339863	0.0383817
5_UTR	chr16	+	811073	812679	MSLN	exclusion	9	13	7	32	4	10	0	2	5	13	0	3	-12.2742	1.51709	14.6044	0.000132603	0.0247318
5_UTR	chr16	+	1359180	1364030	UBE2I	exclusion	23	64	12	70	35	45	13	29	17	51	26	13	-10.9099	1.07137	17.6648	2.63451e-05	0.012167
5_UTR	chr16	+	1359361	1364030	UBE2I	exclusion	23	64	12	70	35	45	13	29	17	51	26	13	-10.912	1.06687	17.5081	2.86087e-05	0.0124317
5_UTR	chr16	+	1359638	1364030	UBE2I	exclusion	23	64	12	70	35	45	13	29	17	51	26	13	-10.912	1.06687	17.5081	2.86087e-05	0.0124317
5_UTR	chr16	+	1584231	1584275	TMEM204	exclusion	3	8	0	10	0	7	2	1	2	5	3	5	-13.017	1.82717	12.1301	0.000496134	0.0480885
5_UTR	chr16	-	3493155	3493490	ZNF597	exclusion	12	13	5	23	2	21	0	2	2	1	4	14	-12.259	1.49229	14.1875	0.000165469	0.0280303
5_UTR	chr16	+	28875078	28877414	SH2B1	exclusion	2	14	7	24	11	28	0	9	15	6	3	27	-11.8863	1.50768	19.7908	8.63969e-06	0.00778183
5_UTR	chr16	+	28875296	28877414	SH2B1	exclusion	2	14	7	24	11	28	0	9	15	6	3	27	-11.8863	1.50768	19.7908	8.63969e-06	0.00778183
5_UTR	chr16	+	28875314	28877414	SH2B1	exclusion	2	14	7	24	11	28	0	9	15	6	3	27	-11.8863	1.50768	19.7908	8.63969e-06	0.00778183
5_UTR	chr16	-	30041850	30042186	FAM57B	exclusion	3	1	19	5	13	9	5	1	8	0	14	8	-12.4484	-1.46734	14.0802	0.00017518	0.0286824
5_UTR	chr16	+	30077044	30078574	ALDOA	exclusion	0	1	9	1	2	0	3	0	1	0	1	0	-14.0121	-3.48473	15.1944	9.69915e-05	0.0217079
5_UTR	chr16	+	30935896	30936052	FBXL19	exclusion	4	1	8	0	3	0	1	0	2	0	7	3	-13.4987	-2.49508	15.5635	7.97799e-05	0.0186468
5_UTR	chr16	+	56995835	56995890	CETP	exclusion	0	3	0	5	0	1	0	1	0	0	0	3	-14.2153	6.13872	15.0086	0.000107025	0.0235424
5_UTR	chr16	+	77233349	77233347	SYCE1L	exclusion	0	1	0	1	0	2	0	1	0	4	0	2	-14.5163	6.58017	12.5501	0.000396175	0.0425301
5_UTR	chr16	+	81528954	81529080	CMIP	exclusion	0	6	0	6	0	3	0	0	0	9	0	0	-13.6585	6.46845	28.2072	1.08998e-07	0.000268346
5_UTR	chr16	-	87350850	87351026	C16orf95	exclusion	0	0	6	0	2	0	2	0	0	0	0	0	-14.6026	-6.22182	15.8352	6.91053e-05	0.0179718
5_UTR	chr17	+	7255208	7256260	KCTD11	exclusion	3	8	0	9	2	10	0	0	0	4	1	2	-13.171	2.25135	14.2836	0.000157227	0.027132
5_UTR	chr17	-	10267849	10276322	MYH13	exclusion	53	34	63	27	57	38	82	48	62	32	83	58	-10.443	-0.786254	12.2023	0.000477308	0.0471297
5_UTR	chr17	+	36452989	36453148	MRPL45	exclusion	6	0	4	0	0	0	0	0	0	0	0	0	-14.6061	-5.73014	13.3425	0.000259463	0.0325909
5_UTR	chr17	+	45772630	45773477	TBKBP1	exclusion	6	5	2	31	1	15	0	2	2	10	8	7	-12.3779	1.71482	16.7077	4.36041e-05	0.0149098
5_UTR	chr17	+	45908993	45909354	LRRC46	exclusion	14	4	22	4	7	15	3	0	11	3	20	5	-12.2205	-1.36612	14.3073	0.000155265	0.0270181
5_UTR	chr17	+	45973516	45973651	SP2	exclusion	0	0	12	0	0	0	0	0	0	0	0	0	-14.4196	-5.54881	16.2961	5.41752e-05	0.01563
5_UTR	chr17	+	54911460	54912155	DGKE	exclusion	0	12	0	18	2	3	2	0	0	0	0	2	-13.155	2.76936	17.199	3.36607e-05	0.0126676
5_UTR	chr17	+	55122839	55124155	RNF126P1	exclusion	10	6	2	35	7	22	0	4	1	8	0	11	-12.181	1.95946	23.8917	1.01911e-06	0.0016363
5_UTR	chr17	-	61959163	61959223	GH2	exclusion	8	0	3	0	2	0	0	0	0	0	1	0	-14.2677	-6.30834	19.4623	1.02607e-05	0.00797034
5_UTR	chr17	+	72462522	72462841	CD300A	exclusion	0	14	0	3	0	1	0	4	0	3	0	0	-13.6579	6.36354	27.9818	1.2246e-07	0.000282645
5_UTR	chr17	+	78234667	78237479	RNF213	exclusion	8	0	19	8	21	6	3	5	9	3	18	3	-12.2619	-1.62729	19.5974	9.55973e-06	0.00797034
5_UTR	chr17	-	79139794	79139872	AATK	exclusion	0	6	0	1	0	4	0	0	0	0	0	0	-14.3546	5.58764	13.2949	0.000266126	0.033057
5_UTR	chr17	+	79762010	79766893	GCGR	exclusion	36	20	48	33	49	24	40	32	52	12	55	18	-10.8609	-1.03427	18.1251	2.06859e-05	0.0106092
5_UTR	chr18	-	25756988	25757445	CDH2	exclusion	0	0	0	10	0	1	0	1	0	0	0	4	-13.9875	5.5242	16.1985	5.70405e-05	0.0162034
5_UTR	chr18	+	32398247	32400831	DTNA	exclusion	6	17	0	7	3	3	0	4	2	10	0	3	-12.8558	1.96858	15.6865	7.47576e-05	0.0185283
5_UTR	chr18	+	32398302	32400831	DTNA	exclusion	6	17	0	7	3	3	0	4	2	10	0	3	-12.8558	1.96858	15.6865	7.47576e-05	0.0185283
5_UTR	chr18	-	70534528	70534810	NETO1	exclusion	2	0	0	10	1	8	0	4	0	1	0	0	-13.5039	2.64623	12.2995	0.00045307	0.0457143
5_UTR	chr18	+	77794346	77794494	RBFA	exclusion	1	0	2	0	3	0	1	0	1	0	0	0	-14.8273	-6.75222	12.7192	0.000361912	0.0399086
5_UTR	chr19	-	3785135	3786415	MATK	exclusion	0	0	2	13	4	7	0	4	2	22	0	0	-12.8899	2.27494	17.0698	3.60306e-05	0.0129999
5_UTR	chr19	+	3933101	3933668	ITGB1BP3	exclusion	0	1	0	0	6	1	0	0	2	0	11	0	-13.9007	-3.56263	16.5943	4.62899e-05	0.0151872
5_UTR	chr19	-	4558471	4559771	SEMA6B	exclusion	3	8	3	16	2	7	3	15	3	4	6	11	-12.4589	1.53006	14.0121	0.000181636	0.0290278
5_UTR	chr19	-	6670082	6670599	TNFSF14	exclusion	5	2	14	1	16	2	10	2	8	3	5	1	-12.7133	-2.50713	29.9391	4.45822e-08	0.000182931
5_UTR	chr19	+	7599038	7600435	PNPLA6	exclusion	0	7	0	0	0	0	0	2	0	0	0	4	-14.348	5.6162	13.9011	0.000192686	0.0298846
5_UTR	chr19	+	7599128	7600435	PNPLA6	exclusion	0	7	0	0	0	0	0	2	0	0	0	4	-14.348	5.6162	13.9011	0.000192686	0.0298846
5_UTR	chr19	+	7599591	7600435	PNPLA6	exclusion	0	6	0	0	0	0	0	2	0	0	0	4	-14.4282	5.68626	12.8198	0.000342973	0.0386147
5_UTR	chr19	-	9929491	9929731	FBXL12	exclusion	0	0	6	1	2	0	0	0	2	0	2	0	-14.3395	-3.99873	13.6088	0.000225123	0.0313719
5_UTR	chr19	-	14887570	14889353	EMR2	exclusion	4	2	17	2	3	4	24	9	11	8	8	0	-12.3976	-1.43456	13.7985	0.000203502	0.0299407
5_UTR	chr19	-	14939055	14939276	OR7A5	exclusion	4	0	0	2	10	3	23	8	6	2	8	2	-12.7045	-1.5653	12.5846	0.000388937	0.0422278
5_UTR	chr19	+	36630918	36631912	CAPNS1	exclusion	0	0	0	0	6	0	0	0	0	0	5	0	-14.6004	-6.00542	15.658	7.58917e-05	0.0185603
5_UTR	chr19	-	37406071	37407193	ZNF829	exclusion	13	65	41	78	33	59	14	5	16	49	38	45	-10.7712	0.878787	12.4391	0.000420447	0.0435428
5_UTR	chr19	+	38826443	38827873	CATSPERG	exclusion	9	9	59	10	34	31	15	9	45	5	34	26	-11.2281	-1.14509	17.473	2.91417e-05	0.0124317
5_UTR	chr19	-	42637667	42637665	MIR4323	exclusion	5	0	8	2	4	1	0	0	7	3	1	0	-13.4367	-2.16404	12.464	0.000414868	0.0435428
5_UTR	chr19	-	46916069	46916919	CCDC8	exclusion	1	6	0	16	1	9	0	0	0	0	0	3	-13.2324	3.68647	23.1315	1.51295e-06	0.00223487
5_UTR	chr19	+	47421933	47421931	GRLF1	exclusion	0	3	0	1	0	5	0	1	0	1	0	3	-14.1488	6.37069	16.7425	4.2811e-05	0.0147754
5_UTR	chr19	+	48828629	48830100	EMP3	exclusion	17	4	19	1	17	11	13	7	19	2	30	19	-11.815	-1.45152	21.5315	3.48058e-06	0.00428448
5_UTR	chr19	-	49148891	49149451	CA11	exclusion	2	7	38	12	24	20	17	3	39	4	35	30	-11.4519	-1.07505	13.8747	0.000195413	0.0298846
5_UTR	chr19	-	50399419	50400147	IL4I1	exclusion	28	7	15	8	23	19	10	15	35	17	44	11	-11.4457	-0.97352	12.2212	0.000472485	0.0469043
5_UTR	chr19	-	55720803	55720874	PTPRH	exclusion	1	4	20	2	5	2	1	0	4	0	7	2	-13.0059	-1.83837	13.4351	0.000246956	0.0324251
5_UTR	chr19	+	56165416	56166469	U2AF2	exclusion	0	0	13	1	3	0	0	0	2	0	2	0	-13.8574	-3.7741	18.9678	1.32945e-05	0.00853602
5_UTR	chr20	+	11871477	11899105	BTBD3	exclusion	22	53	46	66	39	91	41	73	47	74	49	70	-10.3921	0.811401	12.9381	0.000321962	0.0368104
5_UTR	chr20	+	19193290	19193485	SLC24A3	exclusion	0	0	2	0	2	0	0	0	2	0	2	0	-14.8258	-6.74157	12.7186	0.000362029	0.0399086
5_UTR	chr20	-	26188916	26188914	MIR663	exclusion	1	7	8	369	45	71	16	27	12	9	37	46	-10.4777	1.45906	25.3526	4.77505e-07	0.000928093
5_UTR	chr20	+	30073581	30075376	NCRNA00028	exclusion	21	9	28	3	17	14	23	7	22	4	18	25	-11.6406	-1.15739	15.6124	7.77439e-05	0.0185809
5_UTR	chr20	-	36147578	36152953	BLCAP	exclusion	39	68	28	110	46	72	23	21	28	55	41	54	-10.534	0.815589	12.1105	0.00050138	0.0483432
5_UTR	chr20	+	36932552	36932612	BPI	exclusion	5	5	10	6	13	0	10	1	13	7	19	5	-12.3841	-1.59583	17.9553	2.26148e-05	0.010707
5_UTR	chr20	-	47892378	47894756	ZNFX1	exclusion	23	4	52	19	32	26	11	9	31	4	33	20	-11.3057	-1.22422	19.8329	8.45169e-06	0.00778183
5_UTR	chr20	-	54579229	54580012	CBLN4	exclusion	4	26	0	17	0	7	1	1	7	14	3	2	-12.4724	2.25103	24.6801	6.76809e-07	0.00119019
5_UTR	chr20	+	54987314	54987513	CASS4	exclusion	1	0	11	0	0	1	0	0	1	0	0	0	-14.2665	-4.0011	13.1569	0.000286464	0.0332668
5_UTR	chr20	-	57089765	57089949	APCDD1L	exclusion	0	4	0	8	0	0	0	1	0	3	0	0	-14.0892	5.7013	17.0913	3.56248e-05	0.0129999
5_UTR	chr20	+	57226309	57242559	STX16	exclusion	42	71	27	53	53	62	54	109	50	97	21	75	-10.3235	0.961785	18.1071	2.08824e-05	0.0106092
5_UTR	chr20	+	57226309	57254581	STX16	exclusion	155	151	53	184	91	120	93	169	106	175	43	142	-9.6017	0.924763	18.9785	1.322e-05	0.00853602
5_UTR	chr20	+	61340189	61340558	NTSR1	exclusion	0	0	0	8	0	2	0	2	0	0	0	0	-14.2888	5.2347	12.0687	0.000512741	0.0491818
5_UTR	chr20	+	62289163	62290754	RTEL1	exclusion	9	20	0	22	1	1	3	0	5	18	5	4	-12.4103	1.53407	13.4885	0.000240032	0.0324251
5_UTR	chr20	-	62582181	62582527	UCKL1	exclusion	9	8	0	5	0	6	0	2	0	16	2	0	-13.0195	1.94013	13.1918	0.000281182	0.0332668
5_UTR	chr21	+	34398239	34399169	OLIG2	Inclusion	2	4	0	9	0	1	0	4	0	5	0	15	-13.1685	3.96814	28.298	1.04005e-07	0.000268346
5_UTR	chr21	-	47602732	47604373	C21orf56	exclusion	12	16	0	17	2	11	0	1	13	24	4	7	-12.2093	1.39888	13.7813	0.000205371	0.0300958
5_UTR	chr22	+	20073581	20073664	MIR1306	exclusion	8	20	0	13	2	4	0	8	4	9	2	2	-12.5939	1.8574	17.2796	3.22634e-05	0.0124865
5_UTR	chr22	+	24105208	24105492	C22orf15	exclusion	0	7	0	11	3	3	0	0	3	3	0	7	-13.216	2.11945	12.4376	0.00042078	0.0435428
5_UTR	chr22	-	31884706	31885874	EIF4ENIF1	exclusion	0	0	3	0	3	0	0	0	0	0	2	0	-14.826	-6.51581	13.4727	0.000242054	0.0324251
5_UTR	chr22	+	39760175	39760198	SYNGR1	exclusion	0	4	0	1	0	3	0	0	0	2	0	0	-14.4313	5.99927	13.3289	0.000261342	0.0327155
5_UTR	chrX	+	15518900	15526475	BMX	exclusion	8	6	0	10	9	15	0	7	15	22	6	26	-12.0616	1.25695	12.8511	0.000337276	0.0382063
5_UTR	chrX	+	21392536	21393014	CNKSR2	exclusion	1	15	0	16	0	1	2	5	4	8	3	0	-12.8811	2.09152	16.0982	6.01427e-05	0.016331
5_UTR	chrX	+	41583408	41586278	GPR82	exclusion	4	2	9	1	9	1	6	2	0	0	5	2	-13.2373	-1.99228	13.4634	0.000243262	0.0324251
5_UTR	chrX	+	51486481	51486721	GSPT2	exclusion	0	3	2	10	0	10	0	6	1	5	4	1	-13.1042	2.28231	15.3111	9.11805e-05	0.0209143
5_UTR	chrX	-	70837464	70838367	CXCR3	exclusion	29	18	45	7	35	21	17	3	19	14	51	28	-11.2341	-1.18237	19.4439	1.03598e-05	0.00797034
5_UTR	chrX	+	96138907	96139308	RPA4	exclusion	2	9	0	8	5	7	5	4	3	13	2	13	-12.6283	1.64131	14.2516	0.000159926	0.0274693
5_UTR	chrX	-	100603654	100603957	TIMM8A	exclusion	0	8	1	7	2	7	0	2	4	5	0	2	-13.2102	2.01983	12.1712	0.000485341	0.0477951
5_UTR	chrX	-	106243201	106243474	MORC4	exclusion	1	3	0	6	0	2	0	2	0	1	0	3	-13.8813	3.92542	14.8068	0.000119105	0.0243499
5_UTR	chrX	+	135730336	135730406	CD40LG	exclusion	0	3	0	2	0	1	0	2	0	1	0	2	-14.3529	6.66435	14.3282	0.000153546	0.0268735
5_UTR	chrX	-	142718926	142722319	SLITRK4	exclusion	14	31	7	38	7	17	5	9	16	23	11	31	-11.5526	1.34781	20.3539	6.43614e-06	0.00700689
5_UTR	chrX	-	152710890	152711945	TREX2	exclusion	8	12	0	20	3	7	0	7	6	11	3	6	-12.4351	1.72448	17.6074	2.7153e-05	0.0123794

## Sheet: Sheet3
intron	chr1	-	91851393	91859648	HFM1	exclusion	184	328	361	591	146	221	129	250	32	91	91	134	-10.9952	0.814912	24.0711	9.28426e-07	0.0117039
intron	chr2	+	1520756	1544364	TPO	exclusion	251	186	486	272	480	485	160	99	499	124	663	632	-10.4727	-0.680718	20.2035	6.9627e-06	0.0473287
intron	chr2	+	101606910	101607240	NPAS2	exclusion	5	19	0	16	0	4	0	2	0	12	0	6	-14.6835	4.08469	23.8817	1.02444e-06	0.0122463
intron	chr2	+	179388365	179436025	LOC100506866	exclusion	89	73	47	145	66	110	32	71	62	128	54	92	-11.9763	0.841783	21.3184	3.88973e-06	0.0313594
intron	chr3	-	147114258	147120513	ZIC4	exclusion	7	44	9	51	14	42	6	15	9	28	35	41	-13.1587	1.60038	24.341	8.07028e-07	0.0106264
exon	chr3	-	172165333	172166246	GHSR	Inclusion	6	39	3	73	4	12	2	8	6	12	5	17	-13.6525	2.53435	31.2581	2.25897e-08	0.00142385
exon	chr3	-	172165408	172166246	GHSR	Inclusion	6	32	1	64	3	8	2	7	4	11	4	16	-13.8358	2.72581	27.0995	1.93251e-07	0.00529528
exon	chr4	-	41746099	41748339	PHOX2B	exclusion	3	32	0	24	3	15	3	2	0	6	1	13	-14.2649	3.31725	24.269	8.37758e-07	0.0107565
intron	chr5	+	1802490	1814451	NDUFS6	exclusion	148	206	119	517	106	194	99	77	116	209	126	233	-11.2089	0.834573	23.8891	1.02048e-06	0.0122463
intron	chr5	-	1882175	1882715	IRX4	Inclusion	0	10	0	28	0	0	0	0	0	8	0	3	-15.0296	8.48438	22.0501	2.65628e-06	0.0255792
exon	chr5	-	2749496	2749901	IRX2	exclusion	4	12	0	133	0	9	1	6	3	1	4	1	-13.7732	3.0358	24.5716	7.15975e-07	0.0104334
intron	chr5	-	2749903	2751277	IRX2	exclusion	1	15	5	86	0	9	1	8	3	3	1	3	-14.0214	3.49931	27.79	1.35226e-07	0.00446466
exon	chr5	+	6754864	6757161	PAPD7	exclusion	25	26	10	109	19	35	7	24	23	39	8	27	-13.0255	1.47533	21.5523	3.44301e-06	0.0294713
exon	chr5	+	6754867	6757161	PAPD7	exclusion	25	26	10	109	19	35	7	24	23	39	8	27	-13.0255	1.47533	21.5523	3.44301e-06	0.0294713
exon	chr5	-	134363424	134365011	PITX1	Inclusion	12	31	3	77	15	45	1	6	7	30	14	28	-13.2748	2.04697	33.76	6.23485e-09	0.00048032
exon	chr5	+	145719111	145720083	POU4F3	exclusion	17	25	7	35	0	17	1	6	3	13	1	17	-13.9367	2.58216	22.1026	2.58462e-06	0.0252398
intron	chr6	-	139232510	139233900	REPS1	exclusion	26	13	69	16	136	33	20	18	105	23	93	82	-12.3794	-1.29393	26.8158	2.23796e-07	0.00529528
intron	chr7	-	16415868	16445684	ISPD	exclusion	36	73	21	87	72	112	36	63	37	148	40	98	-12.1421	1.29305	41.7934	1.01445e-10	1.40671e-05
intron	chr7	-	96608905	96643235	DLX6-AS1	exclusion	82	177	63	154	73	131	63	77	48	113	82	117	-11.783	0.883538	25.6589	4.07417e-07	0.00807083
exon	chr7	-	123332401	123332921	WASL	exclusion	5	3	58	14	43	27	18	2	53	7	51	45	-13.0534	-1.46603	20.4425	6.14488e-06	0.0461131
intron	chr7	+	155538298	155556504	RBM33	exclusion	39	71	18	62	32	74	17	53	20	42	27	44	-12.6537	1.22129	20.7529	5.2253e-06	0.0402546
exon	chr8	+	99440166	99443023	KCNS2	exclusion	22	28	9	98	1	8	1	8	1	18	4	9	-13.5682	2.46291	30.3786	3.55424e-08	0.00183111
intron	chr8	-	101545541	101571937	ANKRD46	exclusion	77	124	44	138	50	91	43	83	44	79	88	97	-11.9837	0.841622	21.4038	3.72031e-06	0.0311026
exon	chr8	+	123963532	123966268	ZHX2	exclusion	85	93	51	220	61	80	7	26	47	109	35	38	-12.1068	0.918481	21.3746	3.77741e-06	0.031179
intron	chr8	-	124243999	124250036	ZHX1-C8ORF76	exclusion	49	82	50	121	46	81	62	77	37	92	24	65	-12.1887	0.971616	23.5993	1.18633e-06	0.0134841
intron	chr8	-	124243999	124250036	C8orf76	exclusion	49	82	50	121	46	81	62	77	37	92	24	65	-12.1887	0.971616	23.5993	1.18633e-06	0.0134841
intron	chr8	-	125603478	125711765	MTSS1	exclusion	743	1209	808	2200	981	922	837	1106	867	1486	894	1007	-9.37311	0.554753	27.3256	1.7192e-07	0.00496664
intron	chr8	-	140744447	140898121	TRAPPC9	exclusion	2215	3424	2940	7921	3376	3115	2137	2934	3485	5260	3632	3341	-8.15885	0.471824	242.387	1.18668e-54	4.11388e-49
intron	chr8	-	140898215	140922389	TRAPPC9	exclusion	195	271	122	602	105	163	98	84	142	290	116	148	-11.1242	0.818634	23.2053	1.45594e-06	0.0155302
intron	chr8	-	140922546	140998932	TRAPPC9	exclusion	899	1180	831	2204	781	991	714	856	805	1584	879	889	-9.40847	0.552907	26.5862	2.52032e-07	0.00529528
intron	chr8	-	141034178	141231556	TRAPPC9	exclusion	1700	2423	2017	4383	1971	2229	1525	1863	1860	3164	1971	2048	-8.64131	0.473884	45.9871	1.19036e-11	2.06331e-06
intron	chr8	-	141310715	141321345	TRAPPC9	exclusion	78	133	66	228	54	98	83	85	46	210	77	81	-11.7247	0.951947	29.0535	7.04056e-08	0.00287148
intron	chr8	+	142148238	142151300	DENND3	exclusion	68	94	66	255	58	75	64	85	73	201	66	77	-11.7787	0.853625	23.2985	1.38711e-06	0.0152657
intron	chr8	+	142154360	142160931	DENND3	exclusion	61	75	69	298	44	100	38	61	52	132	77	66	-11.9006	0.942036	26.7577	2.30628e-07	0.00529528
exon	chr8	-	142366587	142368047	GPR20	exclusion	42	56	8	312	28	44	17	19	38	87	45	19	-12.3062	1.0683	21.3465	3.83317e-06	0.0312669
intron	chr8	-	142368049	142377299	GPR20	exclusion	62	134	112	419	54	113	33	55	81	79	68	80	-11.7282	0.891286	24.3344	8.0982e-07	0.0106264
intron	chr8	+	142437171	142441025	PTP4A3	exclusion	44	97	29	246	32	61	23	25	42	102	63	38	-12.1917	1.07878	26.8805	2.16429e-07	0.00529528
intron	chr8	-	143382007	143395743	TSNARE1	exclusion	138	258	155	639	168	212	105	166	195	450	209	200	-10.8775	0.839582	26.6153	2.48272e-07	0.00529528
intron	chr8	-	143436126	143484463	TSNARE1	exclusion	584	922	697	2017	590	707	377	476	742	1272	635	627	-9.67553	0.581907	24.3285	8.12296e-07	0.0106264
exon	chr8	-	143738874	143747939	JRK	exclusion	119	193	112	327	79	132	62	112	81	229	106	110	-11.4391	0.909429	27.539	1.53957e-07	0.00464106
intron	chr8	-	143740358	143745893	JRK	exclusion	65	114	69	168	41	79	37	67	51	127	56	72	-11.9908	0.93537	26.1248	3.20042e-07	0.00652641
intron	chr8	-	143747941	143751348	JRK	exclusion	27	80	35	164	40	58	67	85	64	137	53	54	-12.0813	0.952787	24.5547	7.22304e-07	0.0104334
exon	chr8	-	144939912	144947434	EPPK1	exclusion	130	204	72	350	74	92	61	100	100	397	94	83	-11.3776	0.976646	30.302	3.69739e-08	0.00183111
intron	chr9	+	399261	404916	DOCK8	exclusion	57	34	76	50	206	108	161	134	117	27	181	111	-11.6987	-0.87626	25.1621	5.2709e-07	0.00891349
intron	chr9	-	91667080	91680442	SHC3	exclusion	380	442	939	950	1610	764	1163	941	1851	865	2509	1773	-9.2921	-0.481679	20.4095	6.2518e-06	0.0461131
intron	chr9	+	117071760	117072827	COL27A1	exclusion	1	8	0	15	1	16	0	5	0	2	0	5	-14.8907	4.4902	21.4023	3.7233e-06	0.0311026
exon	chr9	+	139641530	139643024	LOC100128593	exclusion	54	18	102	55	82	53	79	23	62	27	79	88	-12.2663	-0.978232	20.416	6.23079e-06	0.0461131
intron	chr10	-	18840902	18874876	NSUN6	exclusion	1066	843	1825	849	1874	1270	1898	1176	1609	948	1810	1903	-9.10687	-0.579261	35.6289	2.38724e-09	0.000275862
intron	chr12	+	81102395	81102619	MYF6	Inclusion	0	9	0	22	0	7	0	0	0	3	0	7	-15.013	8.59856	25.4088	4.63797e-07	0.00869107
exon	chr13	-	53419941	53422775	PCDH8	Inclusion	9	22	3	76	4	10	1	2	0	20	2	4	-13.8792	2.82307	24.6288	6.95043e-07	0.0104334
exon	chr13	-	53420232	53422775	PCDH8	Inclusion	8	22	3	70	3	10	1	2	0	20	1	4	-13.9398	3.22753	28.0985	1.15295e-07	0.00443778
exon	chr14	+	29236287	29238871	FOXG1	Inclusion	13	24	7	93	18	48	18	26	12	28	10	28	-13.0992	1.52557	22.9687	1.64657e-06	0.0170393
intron	chr14	-	57272295	57276875	OTX2	Inclusion	5	19	5	46	7	21	1	10	9	13	1	16	-13.851	2.26324	21.0319	4.51707e-06	0.0355894
exon	chr14	+	65007186	65009954	HSPA2	Inclusion	5	29	0	50	3	17	1	4	0	6	1	7	-14.0928	3.84595	32.0419	1.50882e-08	0.00104613
intron	chr14	-	93424713	93428698	ITPK1	exclusion	17	21	2	57	8	37	6	10	7	30	7	11	-13.5173	1.81208	21.7875	3.04573e-06	0.027749
intron	chr15	-	28391492	28397821	HERC2	exclusion	75	81	49	146	59	98	44	64	43	81	31	78	-12.1231	0.866501	20.2884	6.66024e-06	0.0473287
intron	chr16	+	3163490	3165354	ZNF205	exclusion	9	26	3	17	11	43	6	26	18	29	11	29	-13.4296	1.6998	22.4414	2.16649e-06	0.0214588
exon	chr16	+	77232005	77233543	MON1B	exclusion	5	16	3	18	0	12	0	4	4	19	2	18	-14.2375	2.788	21.171	4.20074e-06	0.0334775
intron	chr17	+	80399144	80399674	HEXDC	exclusion	30	14	68	48	79	51	60	37	185	26	151	70	-12.1322	-1.14105	30.4001	3.51502e-08	0.00183111
intron	chr18	-	10752879	10757965	FAM38B	exclusion	93	84	298	110	281	161	125	60	228	67	235	280	-11.2407	-0.827744	23.1617	1.48933e-06	0.0156457
intron	chr19	-	2555188	2646220	GNG7	exclusion	1534	1273	1707	1898	2458	1272	2598	2700	2880	2026	3226	2079	-8.69383	-0.372406	23.3654	1.33966e-06	0.0149813
intron	chr19	-	3478929	3480393	C19orf77	exclusion	29	12	43	2	39	29	11	0	35	3	42	27	-13.2405	-1.79899	27.6498	1.45385e-07	0.00458187
intron	chr19	+	3920798	3924579	ATCAY	exclusion	105	101	223	102	255	104	227	146	230	123	271	204	-11.1895	-0.762345	20.7869	5.13333e-06	0.0399904
intron	chr19	+	7571053	7571940	C19orf45	exclusion	22	3	47	12	30	28	25	3	50	15	63	36	-13.0267	-1.50683	23.6637	1.14725e-06	0.0134819
intron	chr19	-	8171119	8173052	FBN3	exclusion	107	106	378	152	366	186	369	234	327	144	457	339	-10.7752	-0.804079	25.4557	4.52651e-07	0.00869107
intron	chr19	+	10222418	10224307	P2RY11	exclusion	30	12	40	8	55	17	42	19	47	19	44	18	-12.9715	-1.49005	25.3091	4.88398e-07	0.00891123
intron	chr19	-	11319781	11322450	DOCK6	exclusion	120	128	327	102	336	246	136	89	451	142	474	343	-10.8645	-0.812758	24.5732	7.15387e-07	0.0104334
intron	chr19	-	14758179	14761895	EMR3	exclusion	33	37	136	27	125	82	88	40	112	35	125	90	-12.0033	-1.03112	29.8797	4.59709e-08	0.0021249
intron	chr19	+	48173803	48176825	GLTSCR1	exclusion	68	68	159	73	208	127	168	68	204	72	233	212	-11.4305	-0.819259	22.8352	1.76502e-06	0.0179965
intron	chr19	+	49404190	49407602	NUCB1	exclusion	81	41	111	38	135	73	82	50	117	56	129	93	-11.9289	-0.94824	27.9953	1.21611e-07	0.00443778
intron	chr19	+	49913134	49916223	CCDC155	exclusion	68	39	107	25	63	62	40	6	65	14	70	52	-12.4363	-1.23579	24.8254	6.27651e-07	0.0103613
intron	chr19	+	49977931	49978946	FLT3LG	exclusion	21	30	78	24	97	74	63	19	113	27	135	98	-12.1872	-0.987543	21.7402	3.12173e-06	0.027749
exon	chr20	-	26188822	26188914	MIR663	exclusion	0	6	7	325	46	71	17	30	11	6	37	50	-12.4674	1.44639	26.9777	2.05818e-07	0.00529528
intron	chr20	+	62891627	62895780	PCMTD2	exclusion	48	97	40	65	39	74	54	81	19	158	28	65	-12.2084	1.22313	34.0365	5.40873e-09	0.000468762
intron	chr21	+	45507811	45509712	TRAPPC10	exclusion	17	58	49	48	4	40	5	11	13	73	19	25	-12.9614	1.44394	20.5995	5.66103e-06	0.0431321
exon	chr22	-	37576206	37576907	C1QTNF6	exclusion	2	12	6	13	1	19	0	10	4	10	0	14	-14.3548	2.75904	20.2188	6.90716e-06	0.0473287
exon	chr22	+	42353676	42354946	BK250D10.8	exclusion	20	5	26	20	35	21	17	5	35	1	47	18	-13.3157	-1.52934	20.1732	7.07387e-06	0.0476175
exon	chrX	-	125297482	125300080	DCAF12L2	exclusion	10	27	7	67	14	27	6	9	20	44	6	25	-13.2965	1.6728	23.975	9.75929e-07	0.0120831

## Sheet: Sheet4
3_UTR	chr1	+	20977186	20978004	PINK1	exclusion	1	5	0	16	0	26	1	5	5	12	3	4	-11.3449	2.81628	17.1034	3.53995e-05	0.04217
3_UTR	chr1	-	52888948	52889605	ZCCHC11	exclusion	0	0	0	5	0	9	0	2	0	0	0	9	-12.4083	7.14917	18.1881	2.00123e-05	0.0342599
3_UTR	chr1	+	197898391	197899273	LHX9	exclusion	0	4	0	6	0	0	0	1	0	5	0	3	-12.6773	7.43175	17.985	2.22654e-05	0.0342599
3_UTR	chr1	-	229566993	229567244	ACTA1	exclusion	0	2	0	4	0	6	0	0	0	2	0	4	-12.7044	7.07543	16.464	4.95821e-05	0.049487
3_UTR	chr2	-	20110029	20113317	WDR35	exclusion	2	13	0	4	0	4	0	3	0	1	0	3	-12.1859	4.10294	17.2999	3.19211e-05	0.0392939
3_UTR	chr3	-	124944513	124951183	ZNF148	exclusion	0	8	0	6	0	0	0	2	0	0	0	4	-12.6376	7.243	17.6365	2.67408e-05	0.0372371
3_UTR	chr3	-	147103835	147106644	ZIC4	exclusion	2	13	0	3	3	15	0	2	0	10	0	3	-11.7054	3.32881	18.4589	1.73611e-05	0.0342599
3_UTR	chr3	-	147103835	147110183	ZIC4	Inclusion	5	45	0	22	4	31	1	12	5	15	1	8	-10.7064	3.44174	30.7987	2.86233e-08	0.000528515
3_UTR	chr4	-	41746099	41747822	PHOX2B	exclusion	3	30	0	20	2	11	3	3	0	5	0	10	-11.1928	3.18682	21.4124	3.70375e-06	0.0177537
3_UTR	chr5	-	134363424	134364467	PITX1	Inclusion	5	8	0	33	0	23	1	7	4	16	7	8	-11.0008	2.60479	17.6023	2.72252e-05	0.0372371
3_UTR	chr5	-	172659107	172660344	NKX2-5	exclusion	0	11	0	11	0	3	0	2	0	3	0	1	-12.2265	7.84363	24.3667	7.96341e-07	0.00647741
3_UTR	chr8	-	134048973	134050767	SLA	exclusion	1	6	1	5	0	7	0	0	0	8	0	5	-12.1407	3.76945	16.7495	4.26543e-05	0.0450107
3_UTR	chr11	-	94906133	94906417	SESN3	exclusion	0	3	0	8	0	1	0	4	0	2	0	0	-12.6933	7.11646	16.7492	4.26595e-05	0.0450107
3_UTR	chr12	+	81102741	81103256	MYF6	exclusion	0	8	0	8	0	3	0	0	0	6	0	3	-12.2895	7.62464	24.1808	8.77008e-07	0.00647741
3_UTR	chr13	-	31504809	31506744	LOC100507064	exclusion	0	4	0	0	2	9	0	7	0	5	0	5	-12.1846	3.85213	16.5837	4.65498e-05	0.047751
3_UTR	chr15	+	101454980	101456830	ALDH1A3	exclusion	0	0	0	12	0	1	0	2	0	3	0	5	-12.4874	7.14222	17.6315	2.68106e-05	0.0372371
3_UTR	chr16	+	9210771	9213555	C16orf72	exclusion	0	5	0	4	2	22	0	0	2	7	0	8	-11.7395	3.42336	17.4405	2.96438e-05	0.039097
3_UTR	chr16	+	10862964	10863208	NUBP1	exclusion	0	3	0	1	0	5	0	2	0	7	0	2	-12.6866	7.44929	18.4256	1.76668e-05	0.0342599
3_UTR	chr16	+	77232207	77233543	MON1B	exclusion	2	11	0	10	0	10	0	4	1	12	0	10	-11.5597	3.89896	25.7235	3.94e-07	0.00485001
3_UTR	chr18	-	70409549	70416261	NETO1	exclusion	0	4	0	5	0	3	0	0	0	5	0	9	-12.3743	7.54008	22.0154	2.70466e-06	0.0166467
3_UTR	chr18	-	70410991	70416261	NETO1	exclusion	0	4	0	4	0	1	0	0	0	2	0	9	-12.5865	7.21485	18.0987	2.09748e-05	0.0342599
3_UTR	chr19	-	19625028	19625413	TSSK6	exclusion	2	11	0	13	3	13	0	5	3	18	3	11	-11.2631	2.73786	18.6667	1.55682e-05	0.0342599
3_UTR	chr22	-	51205920	51207202	RABL2B	exclusion	11	0	4	0	2	0	0	0	0	0	3	0	-12.7067	-7.5353	20.2683	6.73053e-06	0.0177537
