# Supplementary material for: A High-Dimensional, Deep-Sequencing Study of Lung Adenocarcinoma in Female Never-Smokers
Source: PubMed Central journal article supplement (PMC3566005; doi:10.1371/journal.pone.0055596), 2013-02-06
Supplement: pone.0055596.s008.pdf [file pone.0055596.s008.pdf]

# Table of Contents

|                                                                                                     |           |
|-----------------------------------------------------------------------------------------------------|-----------|
| <b>Supplemental Materials and Methods</b> .....                                                     | <b>3</b>  |
| 1. Patient Samples and Experimental Methods.....                                                    | 3         |
| 2. Mutation Analysis (Exome-seq data).....                                                          | 5         |
| 2.1 Sequence alignment and mutation calling .....                                                   | 5         |
| 2.2 Validation of somatic mutations.....                                                            | 6         |
| 3. Transcriptome Analysis (RNA-Seq data).....                                                       | 6         |
| 3.1 RNA quantification and differential expression analysis.....                                    | 6         |
| 3.2 Detection of fusion transcripts .....                                                           | 7         |
| 3.3 Small RNA sequencing analysis .....                                                             | 9         |
| 4. Array-CGH and MeDIP-Seq Data Analyses.....                                                       | 10        |
| 4.1 Array-CGH data analysis for copy number variations (CNVs).....                                  | 10        |
| 4.2 MeDIP-Seq data analysis for DNA methylation.....                                                | 11        |
| 5. Network and Functional Analysis .....                                                            | 11        |
| 5.1 Functional analysis of DEGs, somatic mutations, and fusion genes .....                          | 12        |
| 5.2 Network analysis of DEGs, somatic mutations, and fusion genes .....                             | 12        |
| <b>Supplemental Figures</b> .....                                                                   | <b>13</b> |
| Figure S1. Overview of experimental data and analysis.....                                          | 13        |
| Figure S2. Circos plots for each patient.....                                                       | 14        |
| Figure S3. Classification of somatic mutations. ....                                                | 15        |
| Figure S4. Workflow for analyzing small RNA-Seq data. ....                                          | 16        |
| Figure S5. Length distribution of small RNA-Seq data (in RPM). ....                                 | 17        |
| Figure S6. MicroRNA-target relations with inversely correlated expression.....                      | 18        |
| Figure S7. CNV plot by chromosome for each patient.....                                             | 19        |
| Figure S8. Genomic regions with copy number gains or losses.....                                    | 22        |
| Figure S9. Statistical enrichment test of functional terms in IPA.....                              | 23        |
| Figure S10. Overall PPI network of 1536 genes.....                                                  | 24        |
| Figure S11. Network modules from MCODE. ....                                                        | 25        |
| Figure S12. Functional grouping of MCODE modules in 3 broad categories.....                         | 26        |
| <b>Supplemental Tables</b> .....                                                                    | <b>27</b> |
| Table S1. Characteristics of Patients.....                                                          | 27        |
| Table S2. Summary statistics for mapping exome-seq data .....                                       | 28        |
| Table S3. List of experimentally confirmed somatic mutations .....                                  | 29        |
| Table S4. RNA-Seq data mapping summary .....                                                        | 31        |
| Table S5. Number of differentially regulated genes and isoforms .....                               | 32        |
| Table S6. Primer sequences for detecting fusion transcripts .....                                   | 33        |
| Table S7. Mapping statistics of small RNA-Seq data.....                                             | 34        |
| Table S8. List of differentially expressed microRNAs .....                                          | 35        |
| Table S9. Inversely correlated microRNA-target relations.....                                       | 36        |
| Table S10. Number of genes with copy number variations outside 1.62-2.46 for each<br>patient.....   | 41        |
| Table S11. Chromosomal gains and losses in previously published papers and in present<br>study..... | 42        |
| Table S12. Correlations between copy number variations and RNA expression .....                     | 43        |
| Table S13. Correlations between DNA methylation and RNA expression.....                             | 47        |
| Table S14. Mapping Summary for MeDIP-Seq data .....                                                 | 50        |
| Table S15. Top scoring gene functions from Ingenuity Pathway Analysis (IPA).....                    | 51        |

**Supplemental References .....52**

**Supplemental Files**

- File S1. Complete pathological reports
- File S2. List of differentially expressed genes and isoforms (DEGs and DEIs)
- File S3. MicroRNA expression plot for tumor and normal tissues
- File S4. List of CNV genes in at least 3 out of 6 patients
- File S5. List of DMR genes
- File S6. Gene lists with brief summaries for somatic mutations and network modules
- File S7 Comparison with public expression data on NSCLC

# **Supplemental Materials and Methods**

## **1. Patient Samples and Experimental Methods**

### **Patient sample description**

Patient samples were obtained from lung cancer patients who had undergone curative surgery. All samples were collected with the written informed consent from patient and prior approval of the institutional review board (Samsung Medical Center-Institutional Review Board; approval number 2010-08-063-006). All cases were first-time (i.e. non-recurrent) lung cancers. None of the patients had distant metastasis or family history of lung cancer (see Table S1).

### **DNA and RNA preparations for NGS**

Genomic DNA and total RNA were extracted from single surgical sample of each patient which contained primary lung adenocarcinoma tumor and adjacent noncancerous lung tissue. The samples were snap-frozen or were stored in RNAlater RNA Stabilization (Qiagen, Germany) solution. Total RNA was isolated using miRNeasy Mini Kit columns according to the manufacturer's protocol (Qiagen). The quality of RNA, which was determined by the RNA integrity number (RIN), was assessed by an Agilent 2100 Bioanalyzer using the RNA 6000 Nano Chip (Agilent Technologies, Amstelveen, The Netherlands). All samples showed RNA Integrity Numbers > 7.0. The quantity of total RNA was determined by NanoDrop (ND-8000) Spectrophotometer (Thermo Scientific, Wilmington, DE, USA) and by Ribogreen analysis (Invitrogen, Carlsbad, CA, USA). Genomic DNA was extracted from the tissues according to standard protocols (proteinase K digestion, phenol/chloroform extraction, and ethanol precipitation). Detailed protocols are available upon request.

### **Exome -seq sample preparation and sequencing**

We prepared and sequenced the exome using the Solexa sequencing technology platform (Genome Analyzer IIX, Illumina, San Diego, CA) following the manufacturer's instructions. We sheared 3 ug of genomic DNA using the Covaris System. The fragmented DNA with an average size of 150 bp was end-repaired using T4 DNA polymerase and Klenow polymerase, and Illumina paired-end adaptor oligonucleotides were ligated to the ends. We analyzed the ligation mixture by electrophoresis on an agarose gel and isolated fragments measuring 200-

250 bp. The purified DNA library was hybridized with the SureSelect Human All Exons V1 probe set (Agilent Technologies) to capture 44 Mb of targeted exons following the manufacturer's instructions. We prepared a Genome Analyzer IIX paired-end flowcell using a captured exome library. Clusters of PCR colonies were then sequenced on the Genome Analyzer IIX platform using the manufacturer's recommended protocols. Detailed protocols are available upon request.

### **RNA-seq sample preparation and sequencing**

Total RNA was prepared in accordance with Illumina's sample preparation protocol for PE sequencing of mRNA. mRNA was isolated from total RNA preparations using poly-T oligo-attached magnetic beads and fragmented with the fragmentation buffer in the mRNA Sequencing Sample Prep Kit (Illumina). Subsequent steps were identical to exome sequencing, except that the size of the purified fragments from the agarose gel was 300 bp. Detailed protocols are available upon request.

### **Small RNA-seq sample preparation and sequencing**

Purified total RNA was processed using the Illumina small RNA sample preparation kit following the manufacturer's protocol. Small RNA fragments, 22 to 30 nucleotides long, were prepared from a PAGE gel and reverse transcribed. Sequencing was performed using the Illumina Genome Analyzer IIX, with 36-bp single read sequencing.

### **Methylated DNA immunoprecipitation-sequencing (MeDIP-seq) sample preparation and sequencing**

Methylated CpG island-associated DNA was prepared using methylation-specific antibody against 5-methylcytidine (Eurogentec, Seraing, Belgium) and Dynabeads with M-280 sheep antibody to mouse IgG (Invitrogen Dynal, Oslo, Norway). Immunoprecipitated DNA was processed for high throughput sequencing using the Illumina ChIP-Seq Sample Prep Kit. For sequencing, a 200 bp-insert sized library was prepared from agarose gel electrophoresis and size selection. Sequencing was performed using the Illumina Genome Analyzer IIX, and 50 bp-long single reads were generated. Detailed protocols are available upon request.

### **Genomic-PCR, RT-PCR and Sanger sequencing**

Somatic mutations and fusion transcript candidates were validated by PCR amplification and Sanger sequencing. Typically, 20 ng of genomic DNA and cDNA equivalent to 40 ng of input total RNA were subjected to PCR amplification using Platinum Taq DNA polymerase (Invitrogen, Carlsbad, CA). Detailed conditions for PCR are available upon request. The PCR products were visually examined by agarose gel electrophoresis, purified using the PCR purification kit (Qiagen) and subjected to conventional Sanger sequencing. When subcloning was necessary, the TOPcloner™ TA kit (Enzymomics, South Korea) was used, following the manufacturer's protocol.

## **2. Mutation Analysis (Exome-seq data)**

### **2.1 Sequence alignment and mutation calling**

Single-end 75-bp reads from the exome-seq were mapped to the human reference genome (build 19) using the Burrows-Wheeler Aligner software (*BWA*, v0.5.9) [1]. An average of 34 million reads was generated for each sample, of which 59% aligned to the targeted regions. Overall, 79% of the targeted regions were covered. Aligned reads were processed using *Picard* software (<http://picard.sourceforge.net>, v1.42) to remove PCR duplicates. The Genome Analysis Toolkit (*GATK*, v1.0.5506) was then used to perform local realignment around indels and to recalibrate base quality scores to produce a more accurate alignment for each sample [2]. Table S2 shows the statistical summary for mapping the exome-seq data for each patient.

Mutation calling was achieved using *JointSNVmix* software (v0.6.2) to take advantage of the paired nature of the tumor and normal samples. *JointSNVmix* provides the posterior probability of somatic mutation ('somatic probability') as the reliability index. Our initial attempt with *VarScan* software (v1.0) produced numerous cases of false positives in subsequent validation experiments [3]. Validation experiments showed that the somatic probabilities below 0.990 were mostly false. The GenomicAnnotator module in *GATK* and *SIFT* were used to annotate the variants in terms of coding potential and to predict the functional effects of the coding variants [4]. The classification of somatic mutations with respect to gene structure and function is illustrated in Figure S3 and further described in File S6.

## 2.2 Validation of somatic mutations

Using the cutoff values of 0.990 and 0.999, we obtained 335 and 189 candidates for somatic mutation, respectively. Among 189 candidates with a somatic probability over 0.999, we selected mutations in CDS, UTR, and noncoding exons for experimental validation.

Conventional Sanger sequencing following PCR amplification confirmed 45 valid mutations with 55 false predictions and 3 ambiguous cases out of a total of 103 cases. The prediction accuracy was below 44%, even with the rigorous criterion of somatic probability over 0.999. Testing additional candidates with a somatic probability between 0.990-0.999, we obtained just one positive out of 9 cases. Candidates for somatic probability below 0.990 turned out to be false in all 21 tested cases. We found only one additional confirmed mutation predicted by *VarScan* only. This low success ratio may be due to contamination by normal cells and/or heterogeneity of the tumor samples. In total, we identified 47 somatic mutations (see Table S3). The sequences of oligonucleotide primers used for PCR and sequencing are available upon request.

## 3. Transcriptome Analysis (RNA-Seq data)

### 3.1 RNA quantification and differential expression analysis

We used the *NEUMA* program to quantify transcript abundance. Since *NEUMA* maps sequence reads to the established transcriptome, identification of novel isoforms is not supported. However, the *NEUMA* program's primary merit is the accuracy of quantification, as its algorithm mimics the real-time PCR process (agreement ratio over 0.9 with experimental data).

**Mapping and quantification.** Mapping of the paired end sequences was carried out using *NEUMA* (version v1.1.1) and *Bowtie* (version 0.12.7) on the hg19 Refseq RNA sequences (release 47) downloaded from the UCSC Genome Browser (<http://genome.ucsc.edu>). For 78-bp paired-end data, *Bowtie* was run with the `-v 0 -a -maxins 600` option, i.e., retrieving all aligned positions, allowing only perfect matches and cDNA fragment sizes of 79-600 bp. The same range of cDNA fragment sizes was used to calculate the normalization factors for each transcript. We mapped all reads to 36,475 RNA isoforms corresponding to 22,744 genes within hg19 RefSeq RNA sequences. A summary of the mapping RNA-Seq data is provided in Table S4. Then we selected the abundance estimates of only 31,841 mRNA isoforms

(20,990 coding genes), taking into consideration the poly-A selection step in the RNA-Seq experimental procedure. Hierarchical clustering of RNA reads revealed two separate groups of normal and tumor tissues in a manner consistent across all 6 patients, validating the functional significance of the gene expression profiles. The RNA-Seq data and results of *NEUMA* quantification were deposited into the GEO database with the accession number of GSE37765.

***Identification of differentially-expressed transcripts.*** We chose to use the *edgeR* program to detect differential expression mainly because it supports an experimental design using paired samples (i.e., tumor-normal pairs from the same person) [5]. However, we were hampered by a number of cases of low-level expression genes or cases of differential expression in only one or two patients. We therefore devised several filtering steps to isolate only the significant differential expression. Four conditions needed to be met for the genes to be selected as differentially expressed genes (DEGs) or differentially expressed isoforms (DEIs) – (i) overall differential expression from the *edgeR* analysis with  $FDR < 0.001$ , (ii) a minimum of 3 patients with significant differential expression, as tested by *edgeR* for individual differential expression with  $FDR < 0.01$ , (iii) consistent up/down regulation among different patients representing more than a two-fold change, and (iv) significant expression in at least 3 patients to remove genes with large fold changes within the noise expression level ( $FVKM > 2$  in either normal or tumor tissue). In total, we selected 1459 genes (543 upregulated and 916 downregulated in tumors) differentially expressed in female NSCLC never-smoker patients. A similar calculation for isoforms yielded 1320 DEIs (460 upregulated and 860 downregulated in tumors). The numbers of DEGs and DEIs according to nPatDE (the number of patients with significant differential expression in *edgeR* with  $FDR < 0.01$ ) and nPat2fold (the number of patients with greater than 2-fold expression changes) are summarized in Table S5. The full lists of DEGs and DEIs are provided in the File S2.

### **3.2 Detection of fusion transcripts**

We used the *FusionMap* and our own in-house developed program, *FusionScan*, to predict candidate fusion transcripts from the RNA-Seq data. These two programs produce a relatively small number of false positives because they require the fusion boundary to occur inside the sequence reads both in single and paired end data.

***FusionMap prediction.*** The RNA-Seq reads were aligned to the human reference genome (hg19) using *BWA* (version 0.5.9) with default parameters. All unaligned or discordant reads, which accounted for approximately 40% of the total reads, were collected as an input file to *FusionMap*. The parameters were set as follows: the minimal end length of the seed read ( $\alpha$ ) = 25, the maximal hits of the read end ( $\beta$ ) = 1, and the non-canonical splice pattern penalty ( $G$ ) = 4. In total, *FusionMap* reported 337 candidates for fusion transcripts, 131 of which were tumor-specific (114 normal tissue-specific candidates and 92 common candidates). We manually examined the *BLAT* alignments for tumor-specific candidates to remove reads whose head or tail part was mapped to multiple genomic loci. Among 54 uniquely mapped candidates, we selected 7 inter-chromosomal and 14 intra-chromosomal events as final candidates for experimental validation. Intra-chromosomal cases were further divided into two groups, one with 4 events where fusion reads mapped onto opposite strands and the other with 10 events between non-neighboring genes on the same strand.

***FusionScan prediction.*** Our in-house program is conceptually similar to *FusionMap*, but the detailed logic and filtering procedures are substantially different. Most notably, we limit the candidates to those with genomic breakpoints inside the introns. Thus, the fusion boundary for both head and tail genes matches the respective exon boundaries exactly. Genomic alignment to hg19 was achieved by using the *SSAHA2* (version 2.5.5) [6] program with the ‘-solexa -skip 6’ option. Candidates for fusion transcripts must satisfy several stringent requirements: (i) a minimum alignment length of 25 bp for both head and tail genes, (ii) the fusion boundary matches the exon boundary at the exact position for both head and tail genes, (iii) the fusion loci are not in a repeat region or in a homologous region with a sequence identity of over 85%, (iv) there is consistent chromosomal identity in the non-fusion reads of paired-end data. Reads satisfying all four of the above conditions were called *seed* reads. Setting the minimum seed read count to 2, we obtained 382 fusion candidates, 91 of which were tumor-specific. We further filtered out cases without valid gene symbols and cases with head and tail genes belonging to the same gene family. In an effort to find supporting evidence, we aligned the original RNA-Seq data with the hypothetical fusion transcript to identify reads with partial overlap with either head or tail genes. These additional reads were designated as the *rescued* reads. After manual inspection of read alignments across the fusion boundary, we obtained 19 tumor-specific and 5 normal tissue-specific candidate fusion transcripts. Only tumor-specific cases were subjected to experimental



validation as final candidates.

**Experimental Validation.** We performed RT-PCR validation experiments followed by Sanger sequencing for 21 fusion candidates from *FusionMap* and 19 candidates from *FusionScan*. In total, we confirmed 19 cases of genuine fusion transcripts (11 common predictions, 6 *FusionScan* only, 2 *FusionMap* only). The list of confirmed fusion transcripts and primer pair sequences are shown in Tables 1 and Table S6. All candidates predicted by both programs turned out to be valid (11 cases). Candidates from *FusionMap* were valid in only 2 out of 10 cases. Candidates from *FusionScan* were valid in only 6 out of 8 cases. Detailed examination revealed that two of the 6 confirmed cases were classified as multi-reads in *FusionMap* and were consequently eliminated in the filtering steps.

### 3.3 Small RNA sequencing analysis

**Computational pipeline.** The workflow for analyzing small RNA-Seq data is shown in Figure S4. In this study, we focused on microRNA exclusively, even though our raw sequencing data included other types of small RNAs. Our analysis consisted of four parts: mapping, normalization and quantification, identification of differentially expressed microRNAs (DEmiRs), and identification of microRNAs inversely correlated with DEGs. Sequence reads were mapped with *Bowtie V.0.12.7* using the perfect match option into the known microRNA database (miRBase release 17) after removing the adaptor sequence (5'ATCTCGTATGCCGTCTTCTGCTTG). Table S7 shows the statistics of read mapping for each patient's data. On average, 70% and 76% of the total reads were mapped to the known microRNAs in normal and tumor tissues, respectively. The portion of mapped microRNAs was consistently higher by 5%-6% in tumor samples. The length distribution of reads is shown in Figure S5. Reads in the range of 20-23 bp occupy 87.2% of the total reads, reflecting an abundance of microRNAs among various groups of small RNAs. MicroRNA abundance was quantified by using the *TMM* normalization program [7]. The raw and normalized expression data were uploaded into the GEO database with the accession number of GSE37765.

Differentially expressed microRNAs (DEmiRs) were determined by using a similar process as that described above for mRNA. Four conditions needed to be met to be selected as DEmiRs: (i) overall differential expression from the *edgeR* analysis with  $FDR < 0.001$ , (ii)

a minimum of 3 patients with significant differential expression as tested by *edgeR* for individual differential expression with  $FDR < 0.01$ , (iii) a greater than two-fold consistent change in up/down regulation among different patients, and (iv) *significant* expression in at least 3 patients. For the last condition, we examined the distribution of normalized microRNA expression values in each patient and determined the upper 25th percentile as significantly expressed microRNA. Thus, the larger of the expression values in either tumor or normal tissues must be within the upper 25% in at least 3 patients to be eligible as a DE*miR*. We found 40 DE*miR*s (23 upregulated and 17 downregulated microRNAs) in cancer, satisfying these conditions (Table S8).

To identify additional functionally important microRNAs, we further investigated the inversely correlated expression between microRNAs and target genes. Targets were limited to the DEGs for this analysis. For DE*miR*-DEG relations, we used both the validated and predicted microRNA-target relations. Validated target relations were obtained by merging the miRecords (version 3) [8], miRTarBase (version 2.5) [9], TarBase (version 5) [10] and miRWalk (last updated November, 2011) [11] databases that collected published results from the literature, and the predicted targets were obtained using TargetScan (version 6) [12]. Using a Pearson correlation cutoff of -0.5 and a P-value cutoff of 0.05, we identified 151 inversely correlated relations among (14 validated and 137 predicted). To explore inversely correlated ‘non-DE*miR*’-DEG relations, we only used the validated targets to reduce false positives. Using the same cutoffs and an additional requirement of a two-fold change in microRNA expression, we obtained 53 inversely correlated relations. In total, we obtained 204 inversely correlated relations between 31 microRNAs and 165 DEGs (Table S9). We also illustrated the inversely correlated relations in the microRNA-centric network as shown in Figure S6.

Overall, we identified 40 DE*miR*s and 13 additional inversely correlated microRNAs that may play important roles in lung cancer development. The expression plot of these functionally important microRNAs in each patient is provided in File S3.

## **4. Array-CGH and MeDIP-Seq Data Analyses**

### **4.1 Array-CGH data analysis for copy number variations (CNVs)**

Array comparative genomic hybridization (CGH) experiments were performed using the Agilent 1M chip with a gender-matched normal human DNA sample as the universal control.

We subtracted the background intensity from the total spot intensity. To remove systematic biases in the chip assay, within-slide normalization was applied using Lowess normalization for log<sub>2</sub> transformed data. The copy number plot for normal samples revealed that none of the normal samples showed any significant copy number alteration. The copy number gain or loss [i.e., log<sub>2</sub> (tumor/normal)] was plotted by the chromosome number for each patient in Figure S7. Five out of six patients showed significant copy number alterations in tumor samples.

We used the circular binary segmentation method (*CBS*) to detect statistically significant somatic copy number alterations. A copy number gain or loss beyond log<sub>2</sub> (tumor/normal) = ±0.3 (corresponding to the range outside 1.62-2.46 copies) was recorded for each patient. Figure S8 shows the copy number-altered regions in all six patients. Table S10 shows the summary statistics of copy number-altered genes and regions in each patient. Genes whose copy number was altered in at least three patients are provided in File S4.

#### **4.2 MeDIP-Seq data analysis for DNA methylation**

Single-end reads from MeDIP-seq were mapped to the human reference genome (build 19) using the alignment software *Eland* (version 2) using default parameters. The reads with base quality less than 20 and redundant reads were removed from further analysis. The statistics for the mapping of MeDIP reads is shown in Table S14. The number of unique reads for each patient was about 15.4 million (37.6%) on average.

DNA methylation patterns represent a potentially valuable biomarker in various types of cancer. We identified the differentially methylated regions (DMRs) using the *edgeR* program with an FDR cutoff value of 0.05. All aligned unique reads were extended to 200 bp in length to compensate for the difference in read length and to incorporate nearby potential methylation sites. We did not use the methylation level as an additional cutoff for MeDIP-Seq data. In total, we found 558 DMRs, almost 75% of which were in the promoter or 5' UTR regions. The list of DMRs with genome annotation (from the UCSC genome browser database for hg19) is provided in File S5.

### **5. Network and Functional Analysis**

### 5.1 Functional analysis of DEGs, somatic mutations, and fusion genes

We obtained 1,536 genes of potential functional importance by collecting 1,459 DEGs, 46 somatic mutations, and 37 fusion genes. Several genes with somatic mutations (*EML1*, *P2RY1*, *PRG4*, *TUBB1*) or genes involved in fusions (*GRHL2*, *RET*, *LAPTM4B*, *LRRC36*) were also differentially expressed; however, the causal relationship was not explored in this study. Ingenuity Pathway Analysis (IPA) software was used to look for statistical enrichment of functional terms in these 1,536 genes. The Benjamini-Hochberg multiple test correction was used with other options at the default setting. A bar plot of significant terms is shown in Figure S9. Top scoring functions from IPA are shown in Table S15.

### 5.2 Network analysis of DEGs, somatic mutations, and fusion genes

The molecular network for 1,536 genes was constructed with the *MIMI* (<http://mimi.ncibi.org/MimiWeb/main-page.jsp>, the last update on Apr. 29, 2010) protein-protein interaction (PPI) database. Figure S10 shows the overall PPI network created with the *MONGKIE* visualization software developed at our own center (<http://mongkie.org>, version 0.1Alpha).

To identify network modules of coherent function, we applied the *MCODE* (<http://baderlab.org/Software/MCODE>, version 1.32) program to find densely connected network components. We used the default parameters, except for the node score cutoff value of 0.5. We obtained the 8 network modules shown in Figure S11. The full list of genes is provided in File S6 with brief descriptions. Several modules from *MCODE* were involved in related functions. We were able to group the network modules into three broad functional categories as shown in Figure S12. Further analysis for biological meaning and pathway modeling is described in the main text.

## Supplemental Figures

Figure S1. Overview of experimental data and analysis.

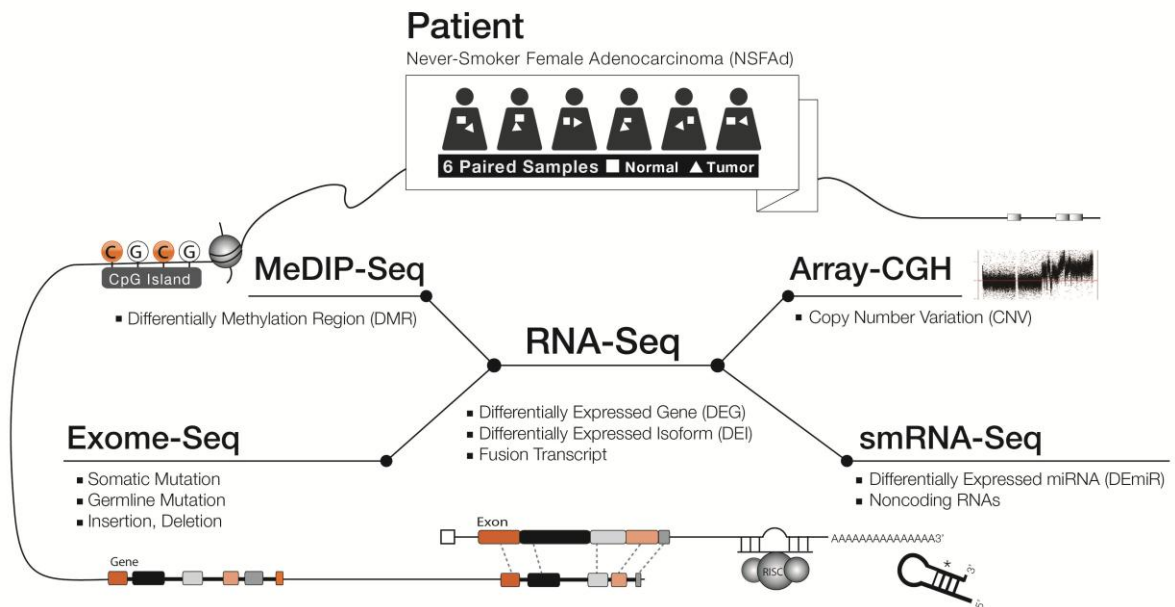

**Figure S2. Circos plots for each patient.**

The information content and color scheme are identical to Fig. 1 that merged results from six patients.

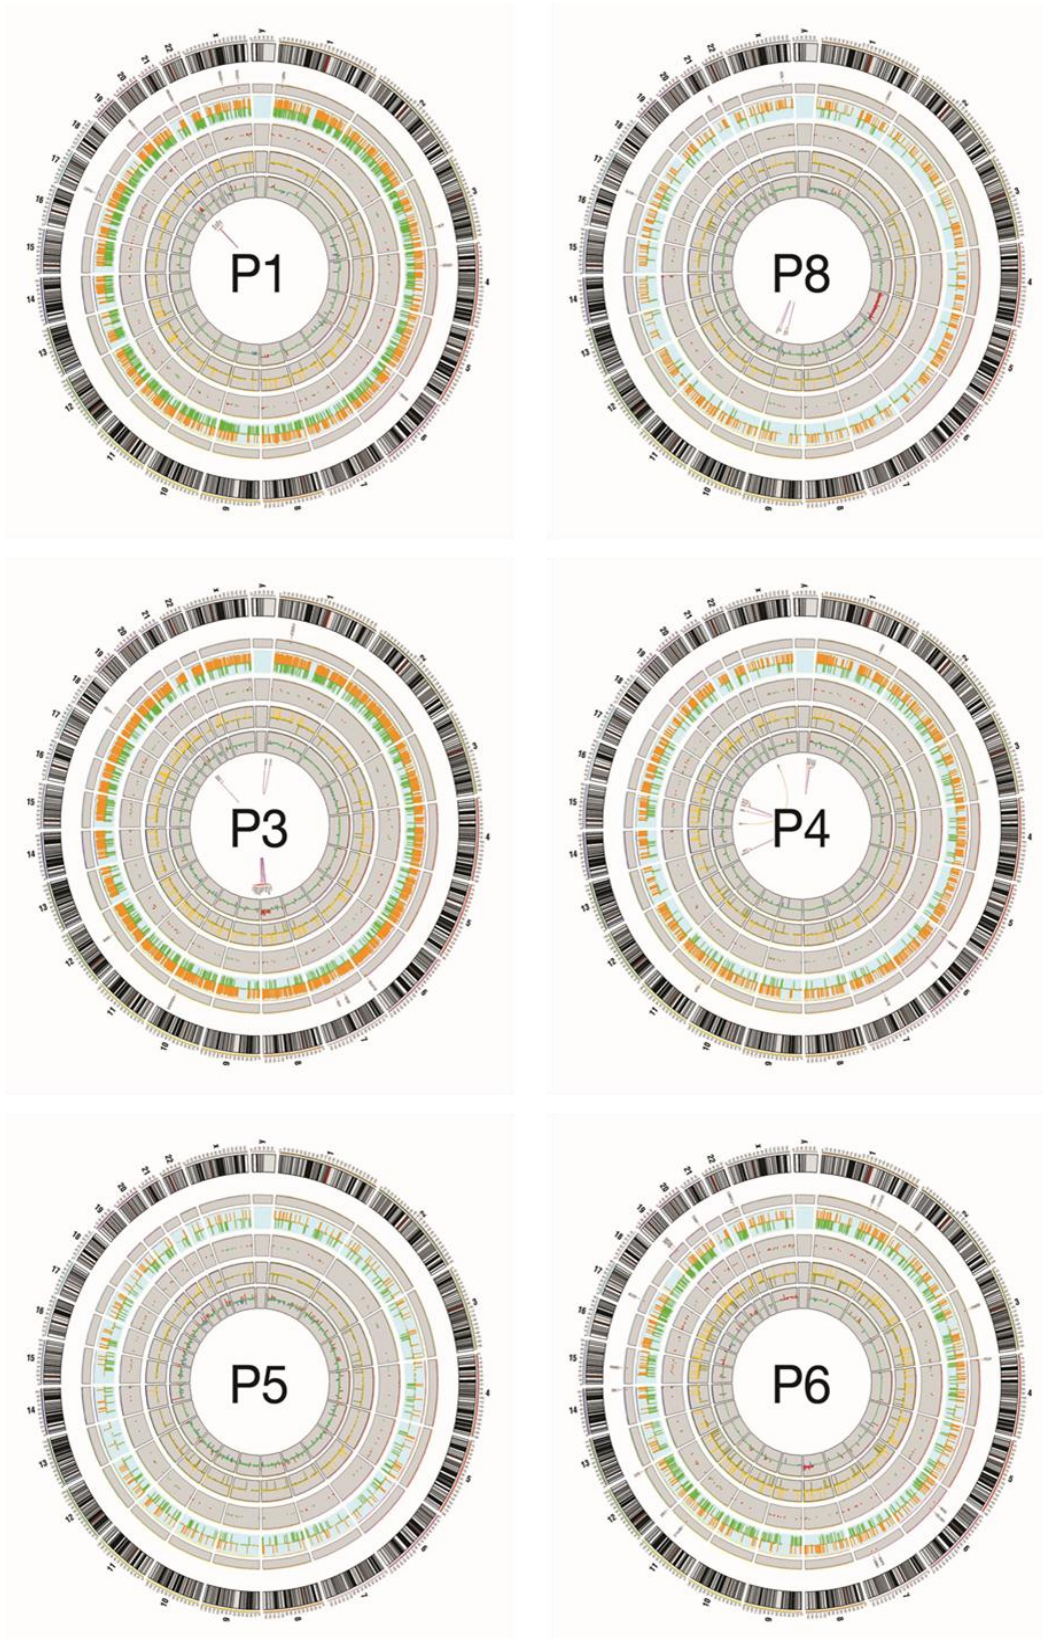

**Figure S3. Classification of somatic mutations.**

The distribution was obtained for 189 somatic mutations predicted by *JointSNVmix* with somatic probability > 0.999.

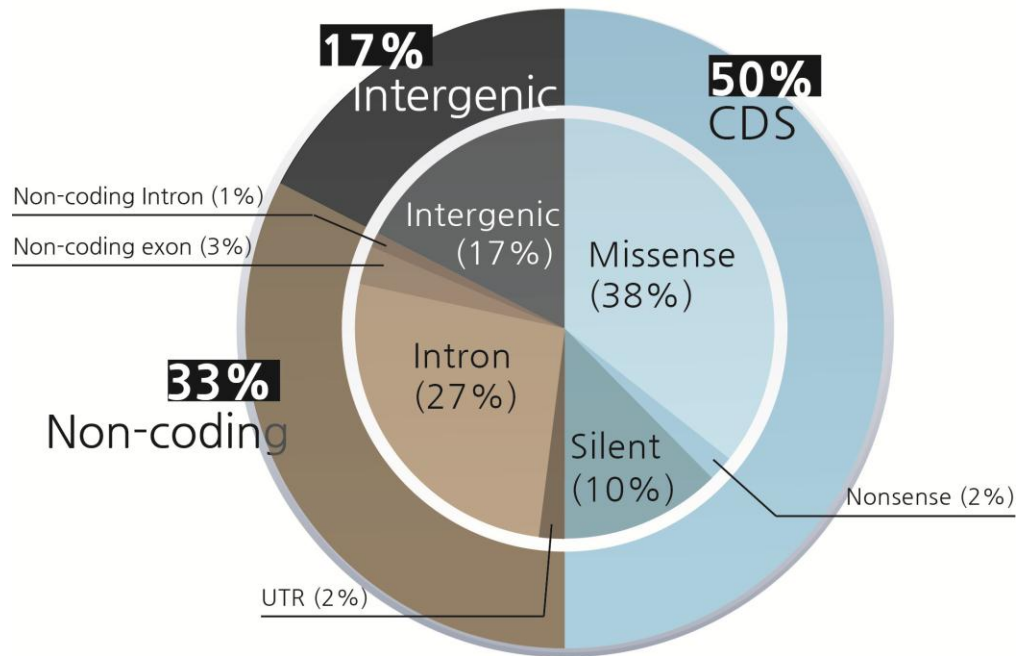

**Figure S4. Workflow for analyzing small RNA-Seq data.**

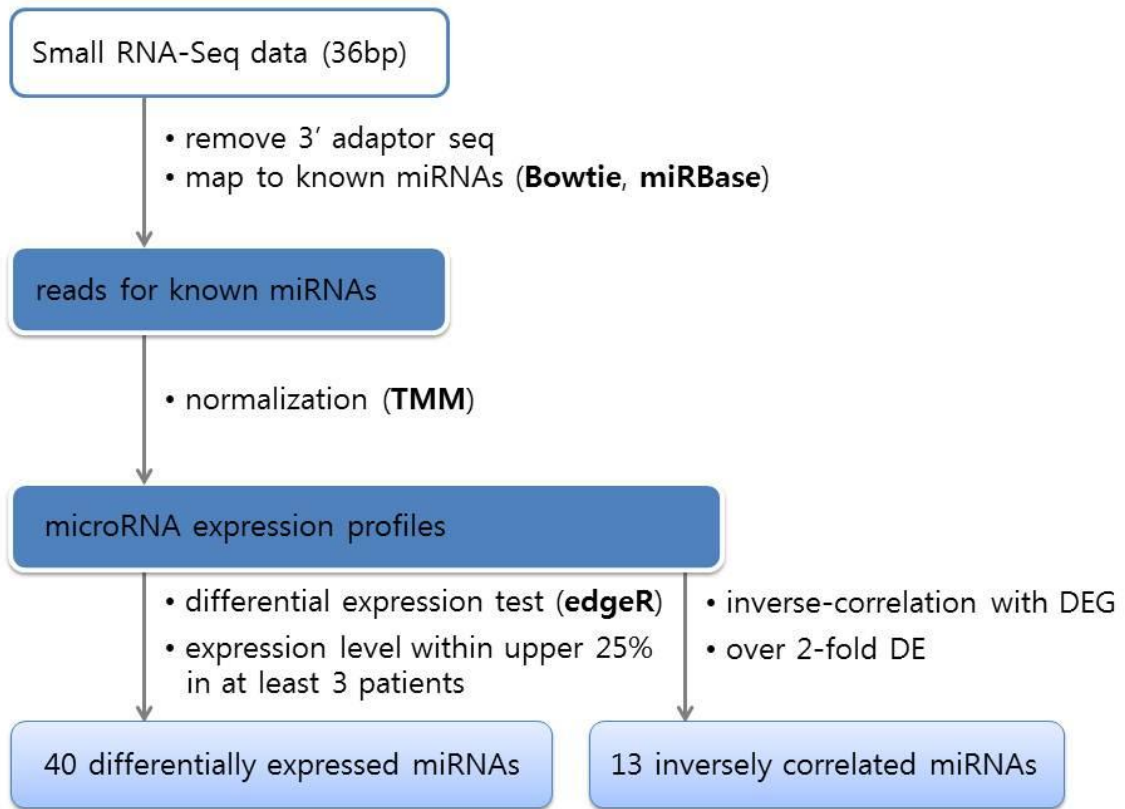



**Figure S5. Length distribution of small RNA-Seq data (in RPM).**  
Read counts were normalized to the reads\_per\_million (RPM) sequences.

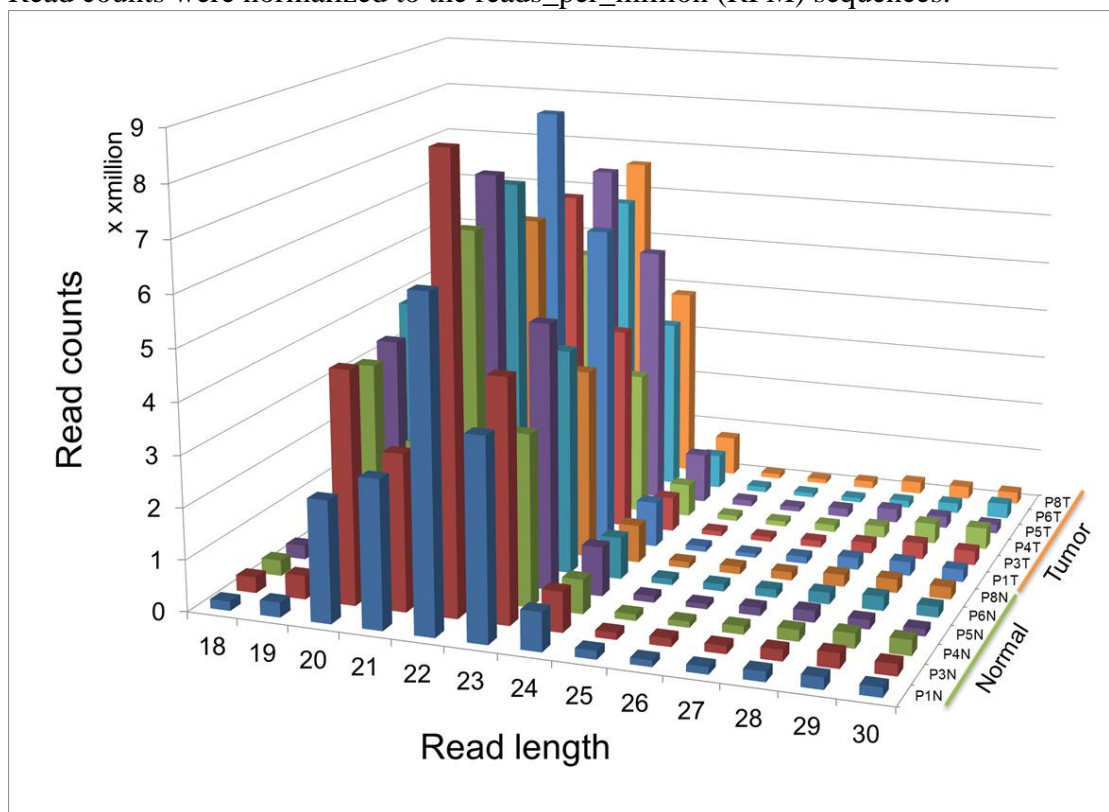

**Figure S6. MicroRNA-target relations with inversely correlated expression.**

We show the DemiR-DEG relations with the Pearson correlation coefficient  $< -0.5$  and P-value  $< 0.05$ . Validated and predicted relations are indicated in solid and dotted lines, respectively. The node color indicates the gene expression level, where red color represent up-regulation in cancer. Triangles are DEMiRs. For convenience, we placed the up-regulated microRNAs in the left side.

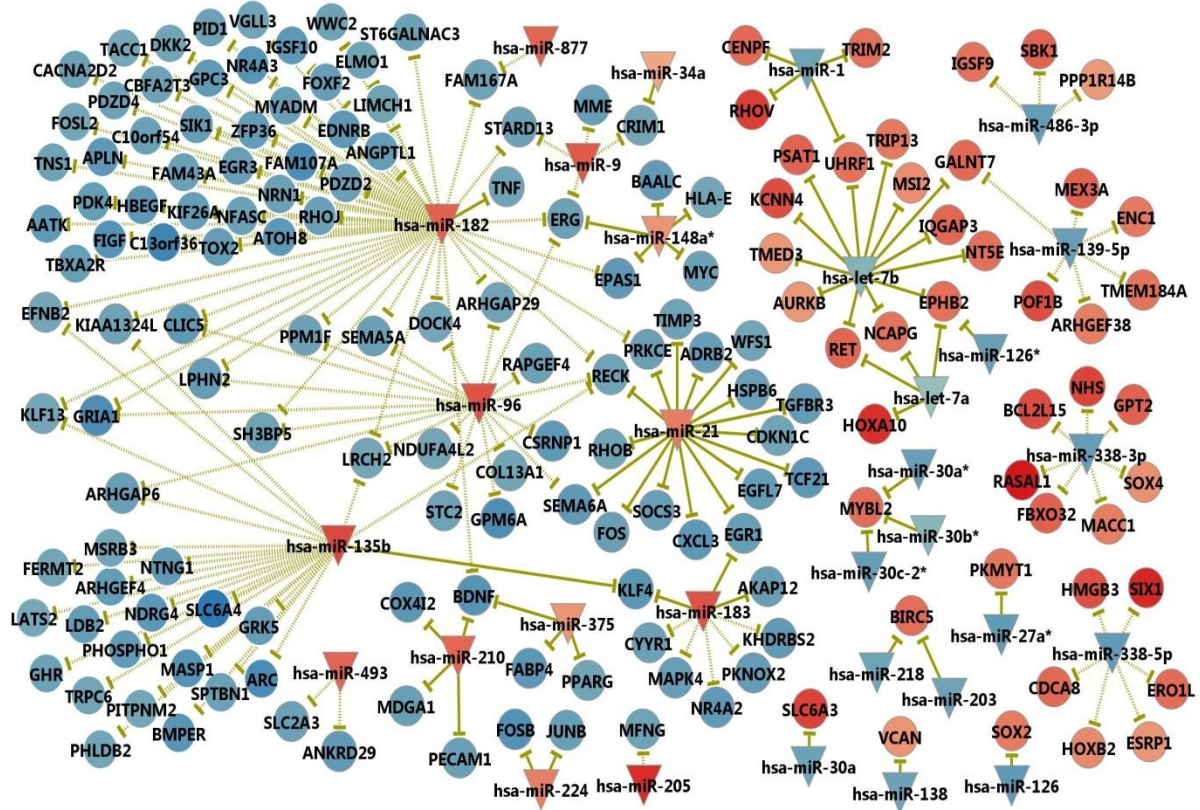

**Figure S7. CNV plot by chromosome for each patient.**  
Copy numbers were plotted in log ratio, i.e.,  $\log_2$  (tumor/normal).

**a**

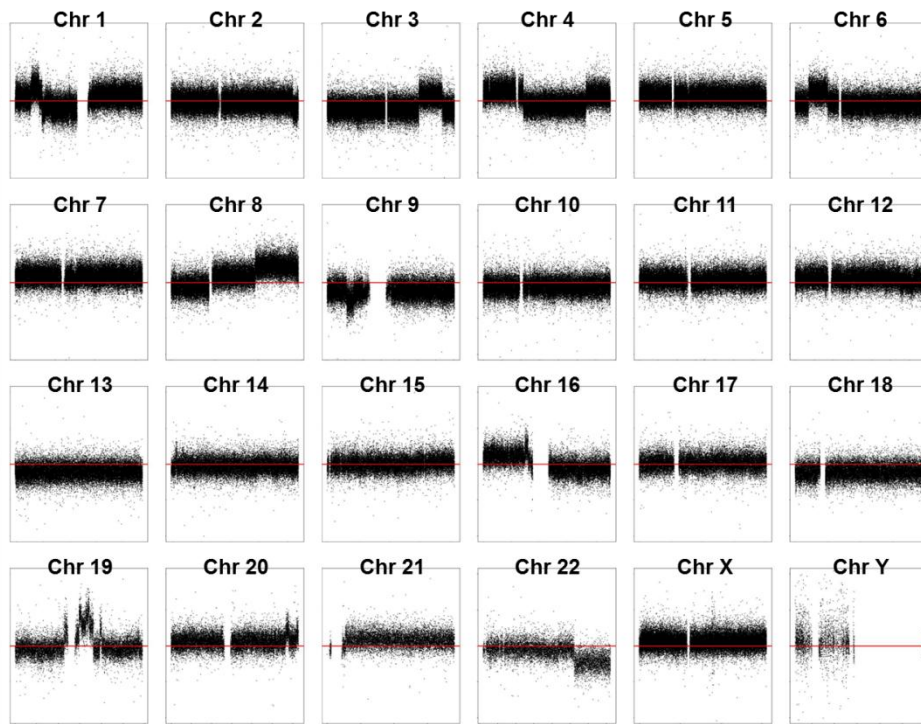

**Patient 1**

**b**

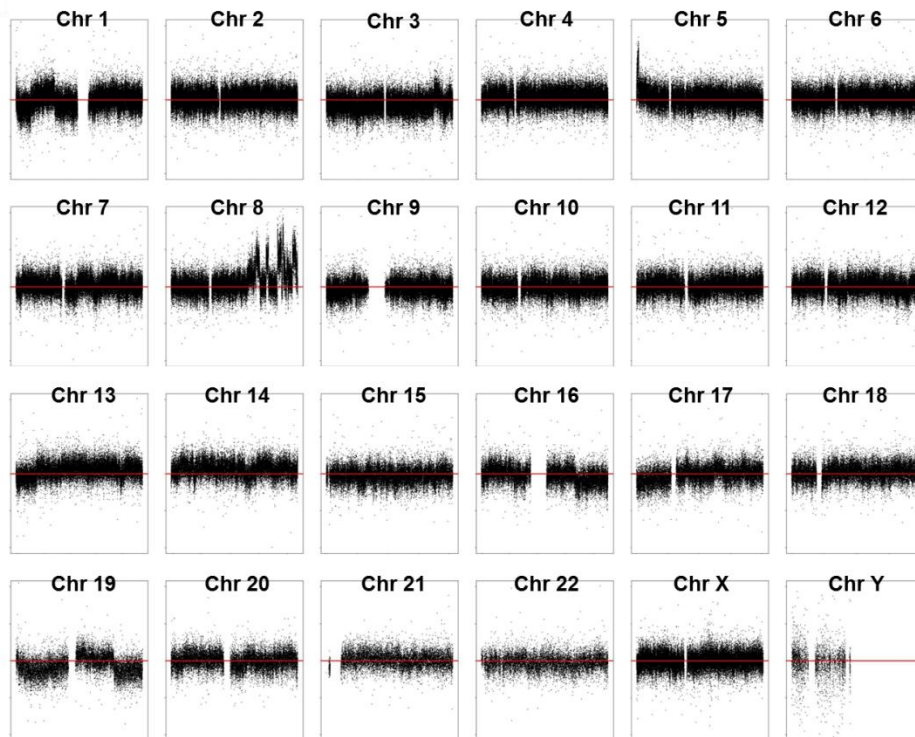

**Patient 3**

**c**

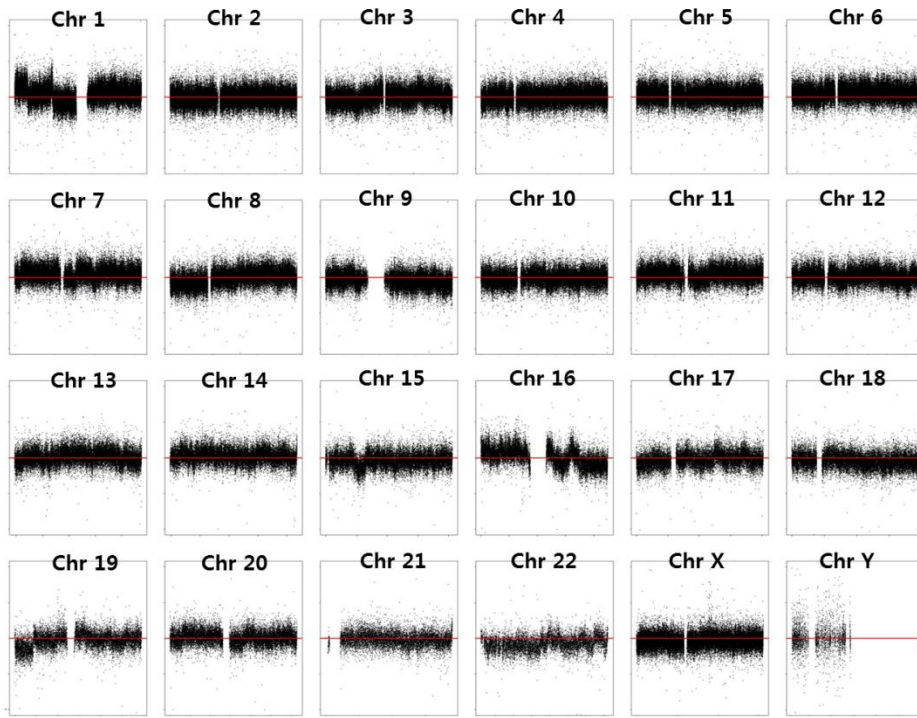

**Patient 4**

**d**

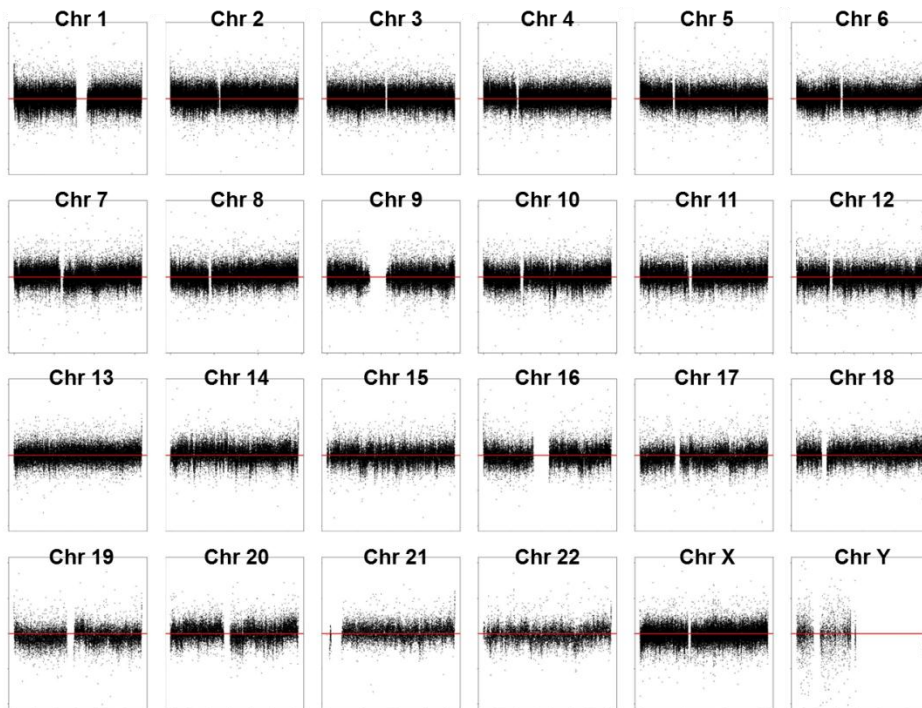

**Patient 5**

e

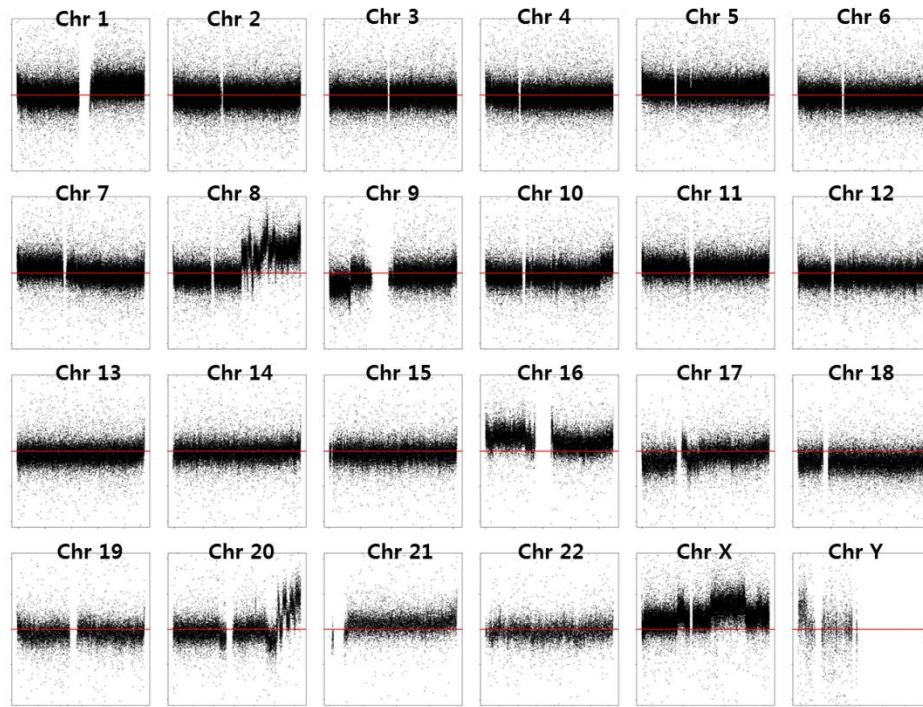

Patient 6

f

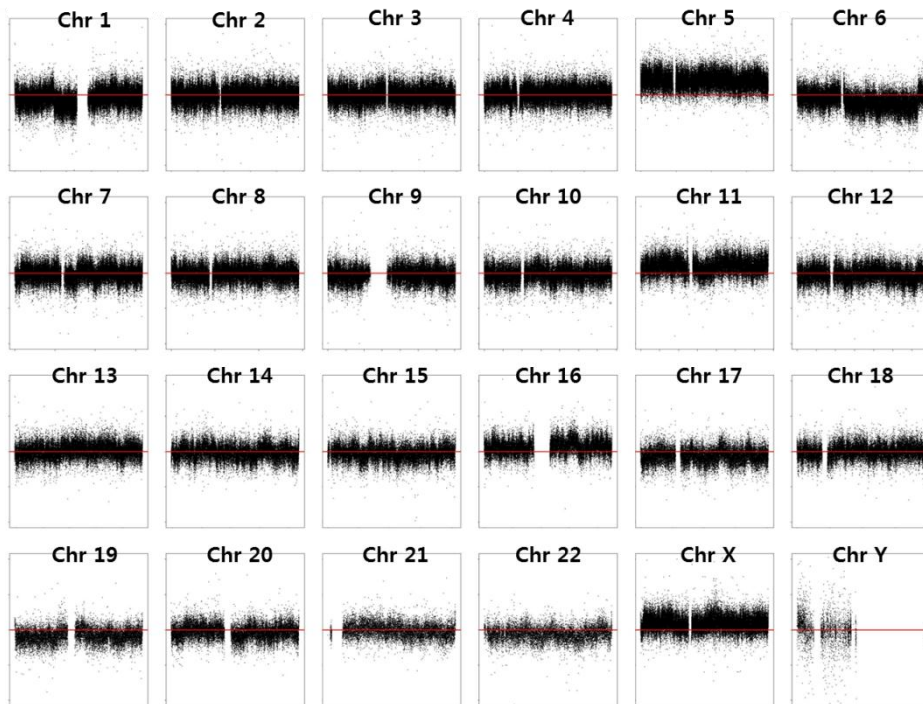

Patient 8

**Figure S8. Genomic regions with copy number gains or losses.**

Red and green indicate copy number gains or losses, respectively. Results from all six patients were overlaid to show the overall trend. Refer to Supplemental Figure 7 to identify responsible patients for each region.

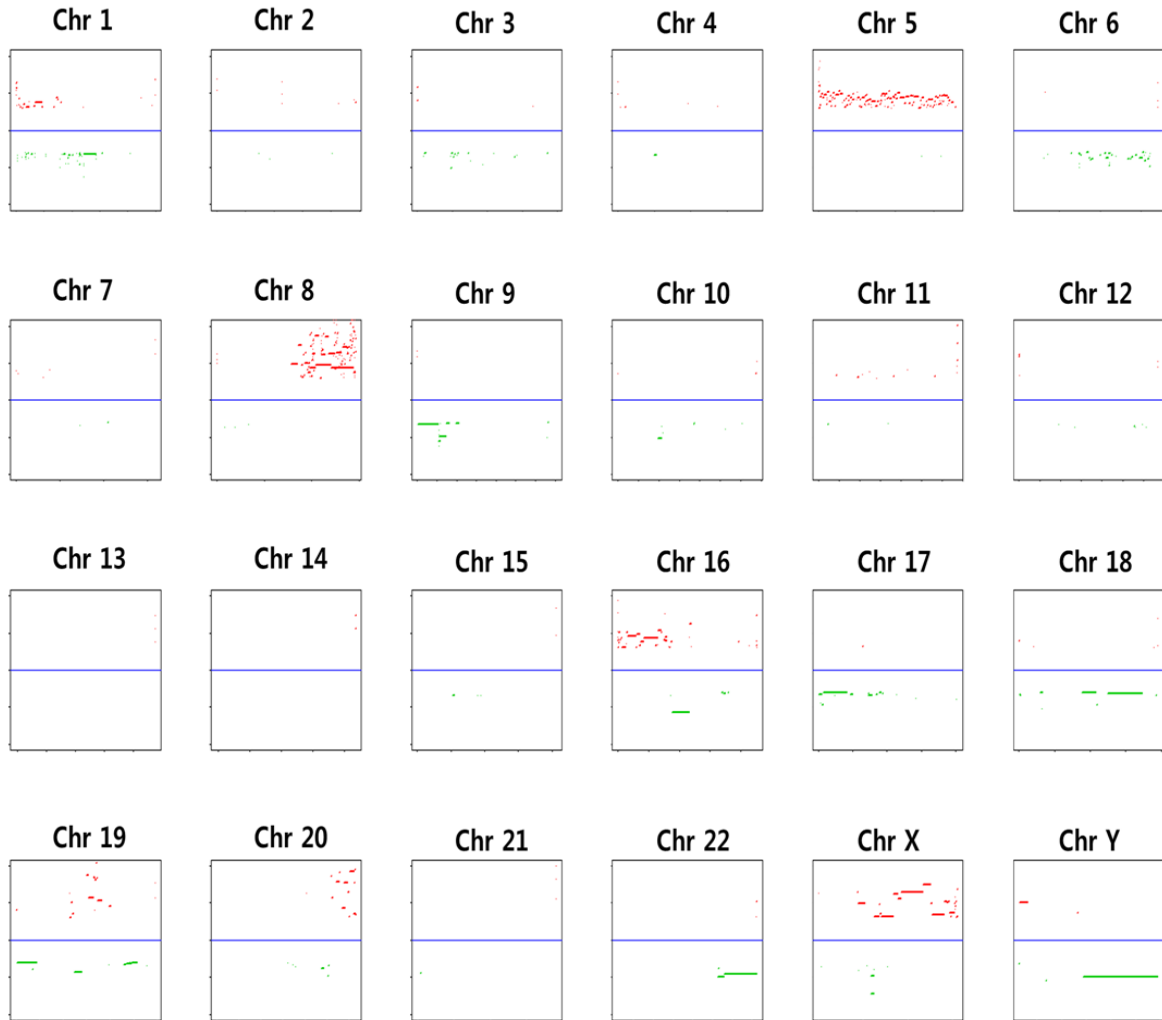

**Figure S9. Statistical enrichment test of functional terms in IPA.**

P-value after Benjamini-Hochberg multiple test correction was plotted in  $-\log_{10}$  scale. Threshold for random permutation is shown in pale grey line.

a. Diseases and Disorders

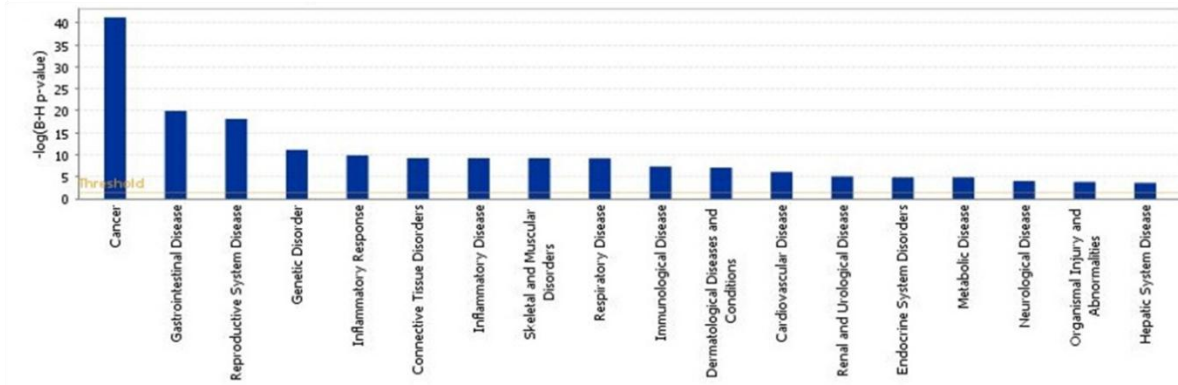

b. Molecular and Cellular Functions

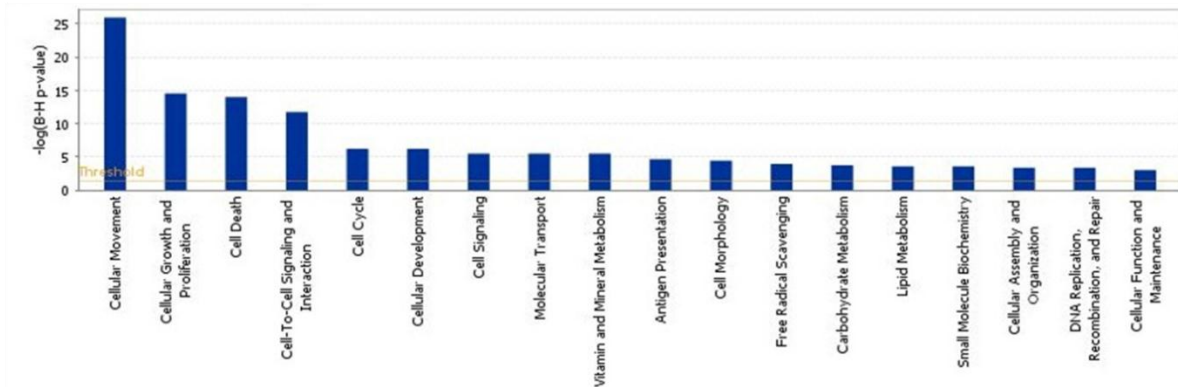

c. Physiological System Development and Function

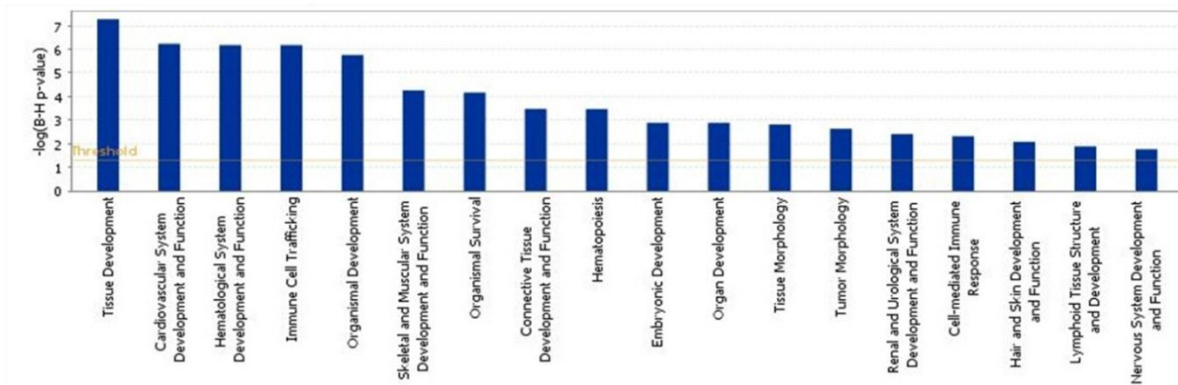

**Figure S10. Overall PPI network of 1536 genes.**

Gene expression level was overlaid in node color (red for up-regulation and blue for down-regulation in cancer). Circles, rectangles, crosses indicate the DEGs, somatic mutations, fusion genes, respectively.

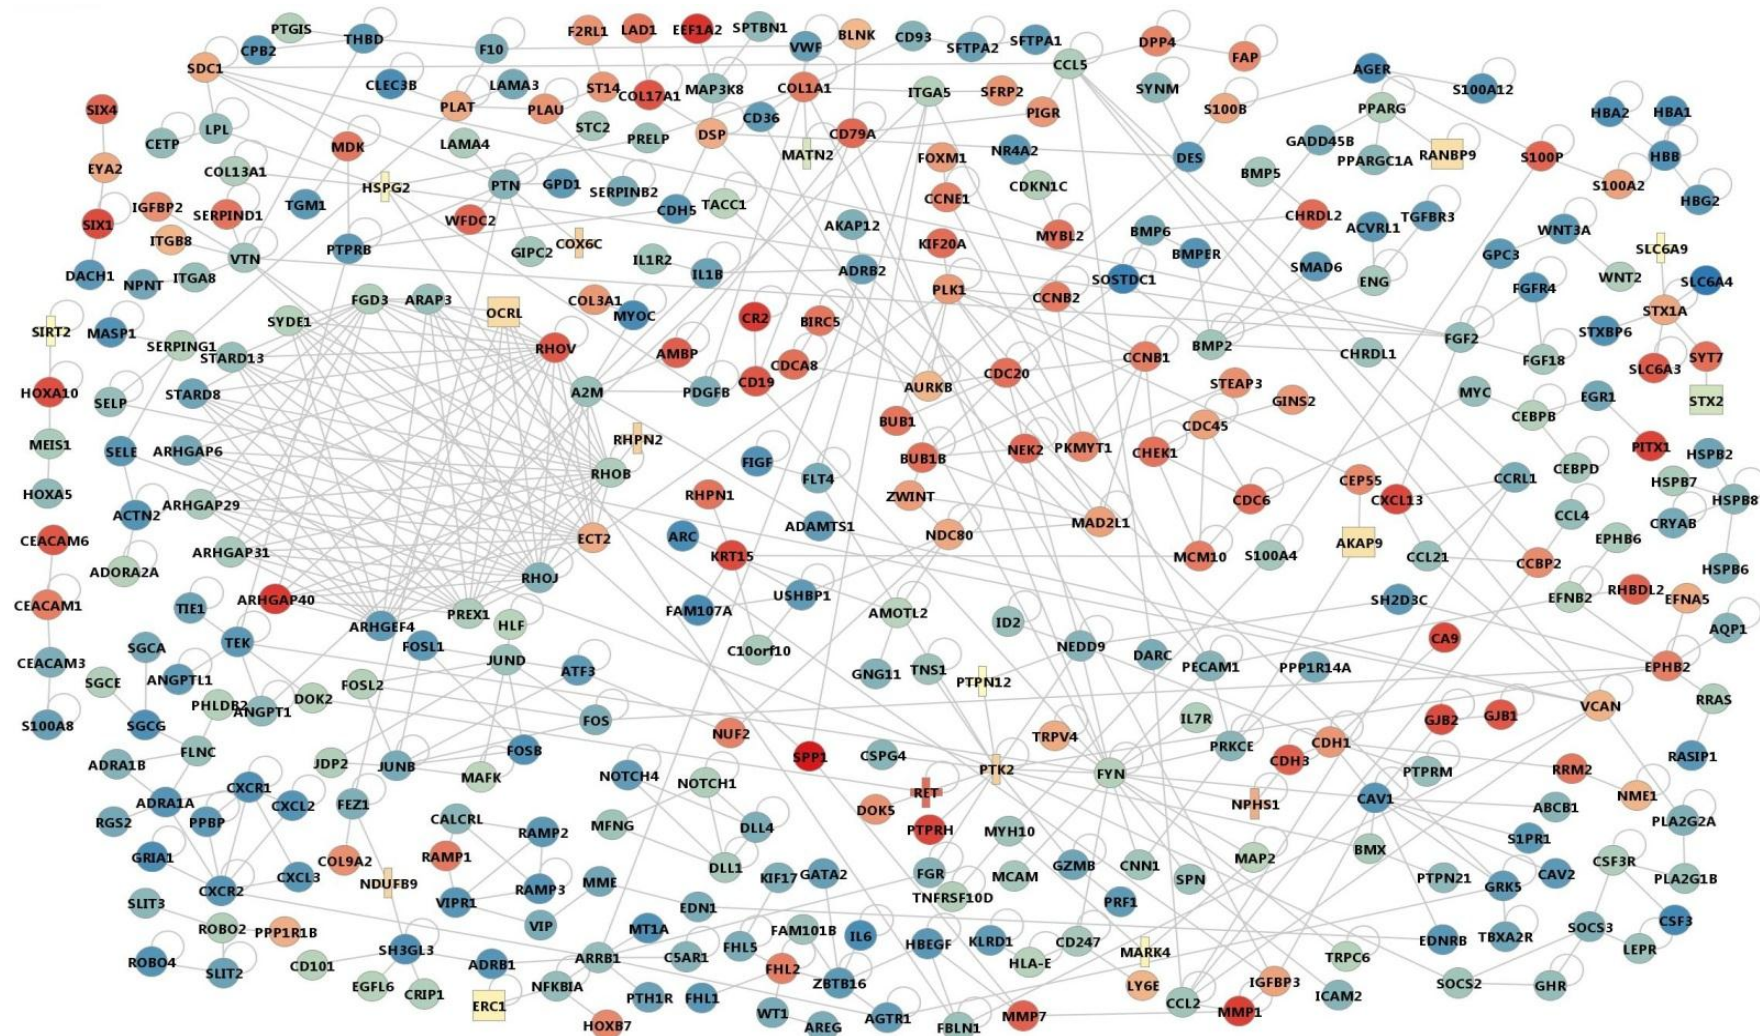



**Figure S11. Network modules from MCODE.**

Circles, rectangles and crosses represent DEGs, somatic mutations and fusion events, respectively. Node color indicates the expression changes (red for up-regulation and blue for down-regulation in cancer).

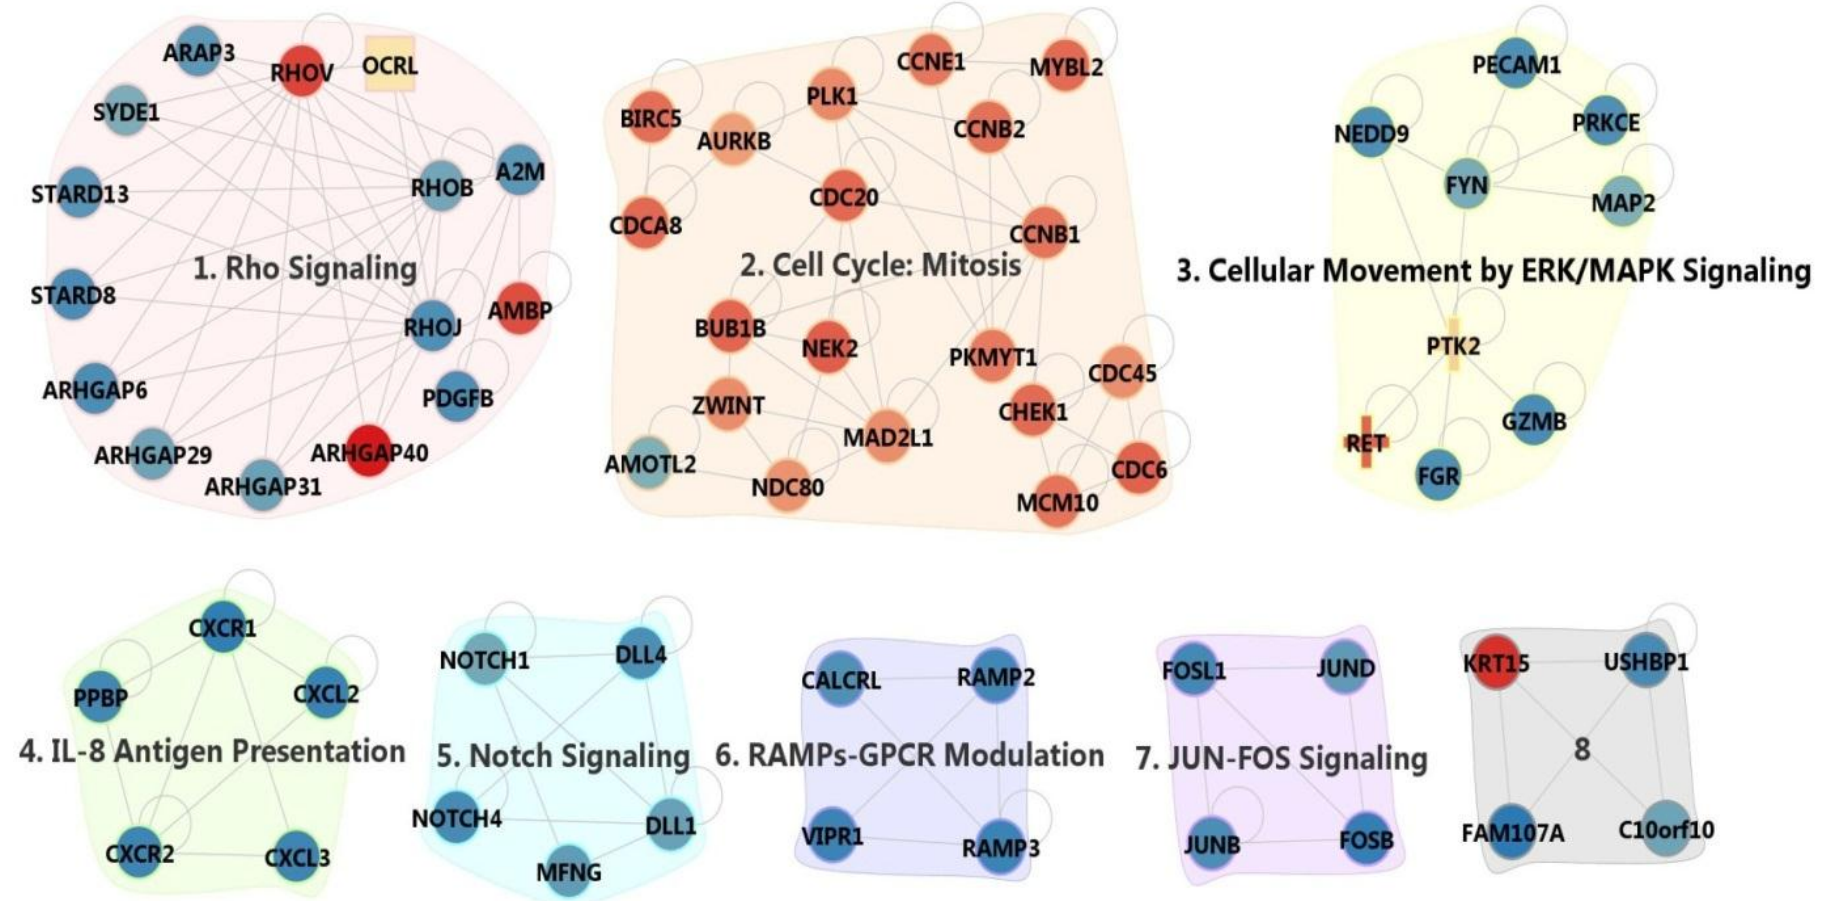

**Figure S12. Functional grouping of MCODE modules in 3 broad categories.**

Rho signaling is mainly responsible for ‘cellular assembly and organization’. Down-regulated modules in Supplemental Figure 11 can be summarized into ‘cellular growth and proliferation’.

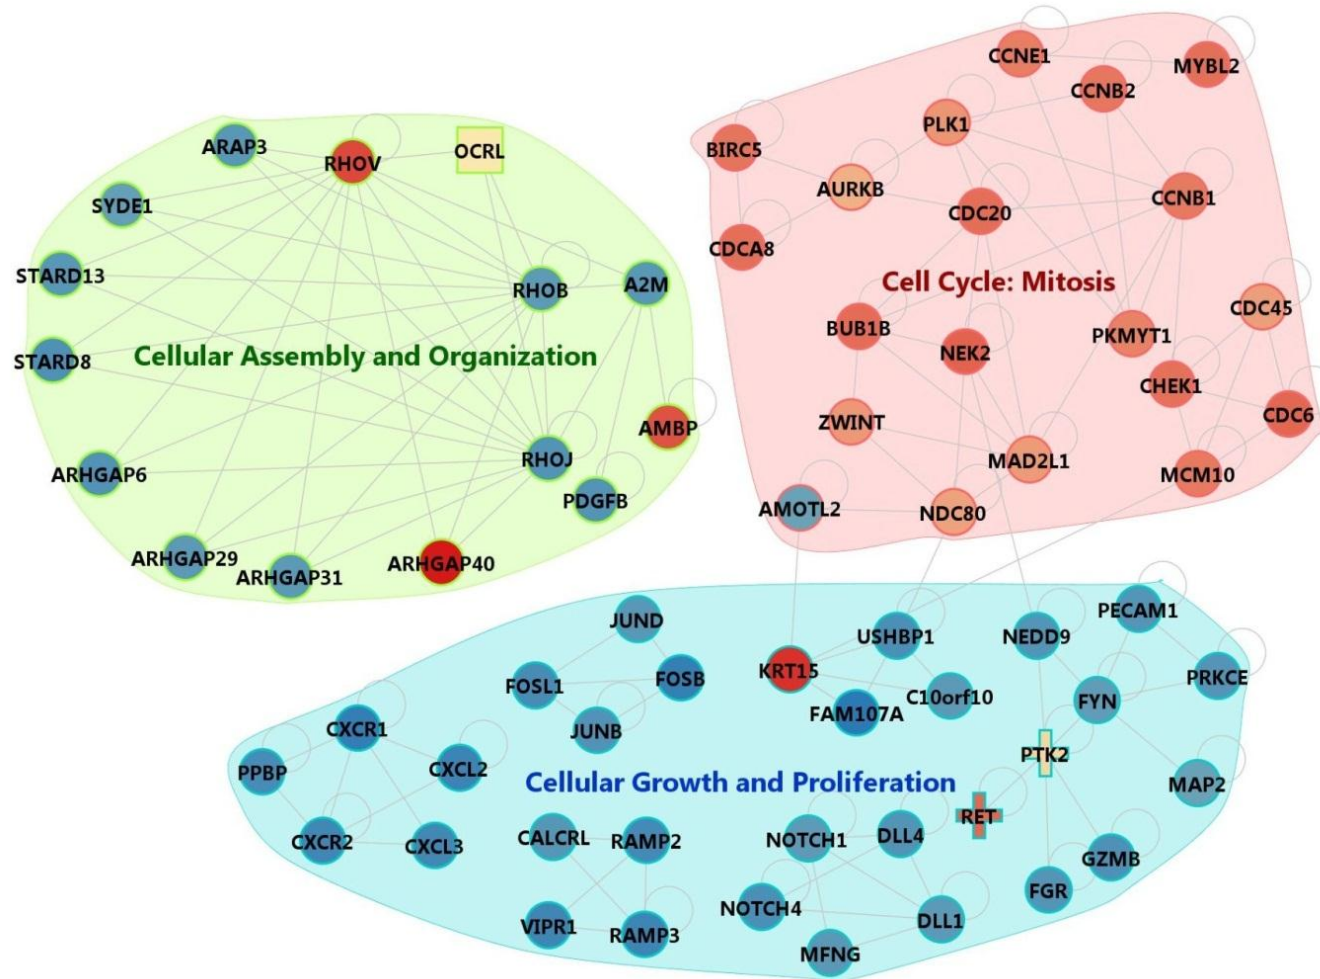

## Supplemental Tables

**Table S1. Characteristics of Patients**

| Bank code | Gender | age | Smoking | Family history of lung cancer | cStage* | Location of tumor | Preop. Chx/Rx*** | TNM pStage** | Tumor size (cm) | Cell type | differentiation           |
|-----------|--------|-----|---------|-------------------------------|---------|-------------------|------------------|--------------|-----------------|-----------|---------------------------|
| PAT1      | F      | 44  | No      | No                            | T2aN0M0 | Left lower lobe   | No               | T2aN0M0, 1B  | 4x4             | ADC       | Moderately differentiated |
| PAT3      | F      | 53  | No      | No                            | T2aN0M0 | Left lower lobe   | No               | T2aN0M0, 1B  | 3.2x3           | ADC       | Moderately differentiated |
| PAT4      | F      | 60  | No      | No                            | T2bN0M0 | Right lower lobe  | No               | T2bN2M0,3A   | 5.5x5x5         | ADC       | Moderately differentiated |
| PAT5      | F      | 44  | No      | No                            | T2bN0M0 | Left lower lobe   | No               | T2bN1M0, 2B  | 5.5x4x3.5       | ADC       | Poorly differentiated     |
| PAT6      | F      | 70  | No      | No                            | T1aN0M0 | Right upper lobe  | No               | T1aN0M0, 1A  | 1.5x1           | ADC       | Well differentiated       |
| PAT8      | F      | 62  | No      | No                            | T1aN0M0 | Left lower lobe   | No               | T1aN0M0, 1A  | 2.5x2.5x2       | ADC       | Moderately differentiated |

\* cStage; preoperative clinical stage

\*\* pStage: postoperative pathological stage

\*\*\* preop Chx/Rx; preoperative chemotherapy/radiotherapy

Note: Patient 3 was also diagnosed with breast cancer unrelated with the NSCLC.

**Table S2. Summary statistics for mapping exome-seq data**

| Sample | Total Reads | Mapped Reads       | Reads on Target    | Mean Depth | 10X Coverage |
|--------|-------------|--------------------|--------------------|------------|--------------|
| P1N    | 39,800,845  | 38,988,924 (98.0%) | 21,912,765 (56.2%) | 36.37      | 78.1%        |
| P1T    | 32,692,466  | 32,064,406 (98.1%) | 19,303,030 (60.2%) | 32.25      | 78.5%        |
| P3N    | 31,438,776  | 30,818,210 (98.0%) | 18,812,691 (61.0%) | 31.44      | 79.0%        |
| P3T    | 35,561,618  | 34,867,098 (98.1%) | 21,371,742 (61.3%) | 35.66      | 79.7%        |
| P4N    | 35,409,407  | 34,658,179 (97.9%) | 20,182,604 (58.2%) | 33.56      | 79.6%        |
| P4T    | 35,762,209  | 34,642,307 (96.9%) | 20,532,966 (59.3%) | 34.20      | 78.6%        |
| P5N    | 32,537,610  | 31,577,241 (97.1%) | 18,851,082 (59.7%) | 31.43      | 77.4%        |
| P5T    | 37,418,478  | 36,544,274 (97.7%) | 22,190,233 (60.7%) | 37.06      | 79.3%        |
| P6N    | 34,806,841  | 34,114,765 (98.0%) | 20,093,569 (58.9%) | 33.54      | 78.1%        |
| P6T    | 36,664,516  | 35,898,987 (97.9%) | 21,080,018 (58.7%) | 35.21      | 78.9%        |
| P8N    | 34,234,550  | 33,406,156 (97.6%) | 19,588,329 (58.6%) | 32.68      | 77.5%        |
| P8T    | 32,282,577  | 31,553,001 (97.7%) | 18,105,065 (57.4%) | 30.26      | 76.8%        |

*N: normal, T: tumor.*

**Table S3. List of experimentally confirmed somatic mutations**

| Gene            | Position          | Base Substitution | Amino Acid Change | Sample | VarScan p-value | JSM Somatic Probability | Functional Region | Mutation Type |
|-----------------|-------------------|-------------------|-------------------|--------|-----------------|-------------------------|-------------------|---------------|
| <i>BAZ1B</i>    | chr7:72,877,265   | T > C             | E>G               | P4     | .               | 1.00000                 | CDS               | Missense      |
| <i>GLP2R</i>    | chr17:9,765,384   | G > A             | G>R               | P8     | .               | 1.00000                 | CDS               | Missense      |
| <i>GLP2R</i>    | chr17:9,765,385   | G > C             | G>A               | P8     | .               | 1.00000                 | CDS               | Missense      |
| <i>IRAK3</i>    | chr12:66,610,996  | G > A             | E>K               | P3     | .               | 1.00000                 | CDS               | Missense      |
| <i>KIR3DL1</i>  | chr19:55,331,286  | G > C             | E>D               | P1     | 0.000005        | 1.00000                 | CDS               | Missense      |
| <i>OCIAD1</i>   | chr4:48,851,982   | A > G             | Y>C               | P1     | 0.000003        | 1.00000                 | CDS               | Missense      |
| <i>OCRL</i>     | chrX:128,682,547  | A > G             | E>E               | P8     | .               | 1.00000                 | CDS               | Silent        |
| <i>OR6K3</i>    | chr1:158,687,066  | A > C             | L>L               | P6     | .               | 1.00000                 | CDS               | Silent        |
| <i>PSMD6</i>    | chr3:63,999,146   | C > T             | A>T               | P6     | .               | 1.00000                 | CDS               | Missense      |
| <i>RANBP9</i>   | chr6:13,632,685   | G > C             | H>D               | P4     | .               | 1.00000                 | CDS               | Missense      |
| <i>ZNF729</i>   | chr19:22,486,610  | G > A             | W>*               | P6     | .               | 1.00000                 | CDS               | Nonsense      |
| <i>EML1</i>     | chr14:100,367,273 | C > A             | P>H               | P6     | 0.001913        | 1.00000                 | CDS               | Missense      |
| <i>POLN</i>     | chr4:2,209,719    | C > T             | D>N               | P6     | .               | 1.00000                 | CDS               | Missense      |
| <i>ZNF536</i>   | chr19:31,048,126  | C > T             |                   | P6     | .               | 1.00000                 | UTR               | .             |
| <i>C11orf82</i> | chr11:82,645,226  | C > T             | P>L               | P6     | .               | 1.00000                 | CDS               | Missense      |
| <i>UBASH3A</i>  | chr21:43,846,887  | T > C             | L>L               | P1     | 0.001372        | 1.00000                 | CDS               | Silent        |
| <i>HPS5</i>     | chr11:18,327,815  | C > T             | G>S               | P4     | .               | 1.00000                 | CDS               | Missense      |
| <i>C6orf118</i> | chr6:165,703,451  | A > G             | L>P               | P3     | .               | 1.00000                 | CDS               | Missense      |
| <i>PEX1</i>     | chr7:92,132,501   | C > T             | D>N               | P3     | .               | 1.00000                 | CDS               | Missense      |
| <i>THOC2</i>    | chrX:122,778,498  | T > A             | E>V               | P1     | 0.000284        | 1.00000                 | CDS               | Missense      |
| <i>FBXO11</i>   | chr2:48,049,365   | T > C             | D>A               | P6     | 0.004079        | 1.00000                 | CDS               | Missense      |
| <i>AKAP9</i>    | chr7:91,624,022   | G > A             | D>N               | P6     | 0.001492        | 1.00000                 | CDS               | Missense      |
| <i>HTR1E</i>    | chr6:87,725,857   | G > A             | D>N               | P4     | .               | 1.00000                 | CDS               | Missense      |
| <i>TUBB1</i>    | chr20:57,599,185  | G > A             | G>S               | P6     | .               | 1.00000                 | CDS               | Missense      |
| <i>MAGEE1</i>   | chrX:75,650,266   | C > A             | P>Q               | P1     | 0.002037        | 1.00000                 | CDS               | Missense      |
| <i>LAMB1</i>    | chr7:107,570,034  | G > A             | A>V               | P6     | 0.002639        | 1.00000                 | CDS               | Missense      |
| <i>ST3GAL3</i>  | chr1:44,363,949   | G > A             | R>H               | P3     | .               | 0.99999                 | CDS               | Missense      |
| <i>COPS3</i>    | chr17:17,174,264  | G > A             | Q>*               | P1     | 0.004029        | 0.99999                 | CDS               | Nonsense      |
| <i>DNAH8</i>    | chr6:38,805,769   | C > A             | Q>K               | P1     | 0.000016        | 0.99999                 | CDS               | Missense      |
| <i>DYRK3</i>    | chr1:206,821,735  | A > T             | I>F               | P8     | 0.001220        | 0.99998                 | CDS               | Missense      |
| <i>GUSB</i>     | chr7:65,432,795   | C > G             | E>Q               | P3     | 0.015379        | 0.99996                 | CDS               | Missense      |
| <i>AXDND1</i>   | chr1:179,414,225  | C > T             | R>W               | P6     | .               | 0.99996                 | CDS               | Missense      |
| <i>UBR4</i>     | chr1:19,513,749   | T > A             | Q>L               | P1     | .               | 0.99996                 | CDS               | Missense      |

|                 |                   |       |     |    |          |         |     |          |
|-----------------|-------------------|-------|-----|----|----------|---------|-----|----------|
| <i>L3MBTL2</i>  | chr22:41,621,880  | C > T | S>F | P6 | 0.005690 | 0.99987 | CDS | Missense |
| <i>RHAG</i>     | chr6:49,578,748   | G > A | G>G | P6 | 0.004376 | 0.99987 | CDS | Silent   |
| <i>SH3PXD2A</i> | chr10:105,377,004 | G > A | G>G | P3 | .        | 0.99987 | CDS | Silent   |
| <i>HLTF</i>     | chr3:148,789,413  | T > C | D>G | P1 | 0.037203 | 0.99986 | CDS | Missense |
| <i>HUNK</i>     | chr21:33,368,156  | C > T | L>L | P8 | .        | 0.99984 | CDS | Silent   |
| <i>ACCN1</i>    | chr17:32,483,181  | G > A | P>L | P6 | 0.004968 | 0.99977 | CDS | Missense |
| <i>STX2</i>     | chr12:131,293,219 | C > A | S>I | P6 | 0.042462 | 0.99977 | CDS | Missense |
| <i>PRG4</i>     | chr1:186,280,672  | C > T | A>V | P4 | 0.001341 | 0.99965 | CDS | Missense |
| <i>FRMD5</i>    | chr15:44,180,429  | A > T | T>T | P6 | 0.016518 | 0.99959 | CDS | Silent   |
| <i>ERC1</i>     | chr12:1,517,325   | G > T | R>L | P6 | .        | 0.99927 | CDS | Missense |
| <i>COL19A1</i>  | chr6:70,733,529   | G > A | G>E | P6 | 0.058559 | 0.99925 | CDS | Missense |
| <i>P2RY1</i>    | chr3:152,554,413  | C > T | T>M | P4 | .        | 0.99908 | CDS | Missense |
| <i>CELF4</i>    | chr18:35,145,519  | C > T | S>N | P3 | 0.010098 | 0.99651 | CDS | Missense |
| <i>MAGEA2</i>   | chrX:151,885,759  | C>A   | A>D | P8 | 0.000021 | N/A     | CDS | Missense |

\* Entries with the missing *VarScan* p-value were not predicted as somatic mutations in *VarScan*.

**Table S4. RNA-Seq data mapping summary**

| Sample | Total Reads | Mapped Reads          | Unique Read 1 | Unique Read 2 | Mean Depth |
|--------|-------------|-----------------------|---------------|---------------|------------|
| P1N    | 77,029,708  | 28,883,762<br>(37.5%) | 8,748,649     | 14,318,738    | 40.1       |
| P1T    | 68,027,769  | 23,091,622<br>(33.9%) | 8,177,784     | 13,437,274    | 32.0       |
| P3N    | 68,729,173  | 27,020,525<br>(39.3%) | 9,396,628     | 15,236,972    | 37.5       |
| P3T    | 82,594,990  | 20,698,728<br>(25.1%) | 7,942,937     | 13,255,831    | 28.7       |
| P4N    | 71,638,908  | 32,253,913<br>(45.0%) | 7,727,492     | 12,780,807    | 44.8       |
| P4T    | 68,361,098  | 22,305,290<br>(32.6%) | 6,791,026     | 11,454,601    | 31.0       |
| P5N    | 68,476,906  | 24,964,793<br>(36.5%) | 6,992,409     | 11,972,068    | 34.6       |
| P5T    | 58,368,764  | 24,472,353<br>(41.9%) | 6,581,958     | 11,293,555    | 34.0       |
| P6N    | 53,972,605  | 27,149,300<br>(50.3%) | 6,595,260     | 11,268,793    | 37.7       |
| P6T    | 59,002,356  | 15,562,845<br>(26.4%) | 6,543,922     | 11,268,793    | 21.6       |
| P8N    | 62,685,510  | 20,648,179<br>(32.9%) | 5,531,378     | 5,321,359     | 28.7       |
| P8T    | 63,815,679  | 15,389,891<br>(24.1%) | 5,260,089     | 5,027,813     | 21.4       |

\* N, normal; T, tumor.

**Table S5. Number of differentially regulated genes and isoforms**

| Number of differentially regulated genes    |                |     |     |    |   |                  |     |     |     |    |   |   |      |
|---------------------------------------------|----------------|-----|-----|----|---|------------------|-----|-----|-----|----|---|---|------|
| nPatDE                                      | nPat2fold (UP) |     |     |    |   | nPat2fold (DOWN) |     |     |     |    |   |   | Sum  |
|                                             | 6              | 5   | 4   | 3  | 2 | 6                | 5   | 4   | 3   | 2  | 1 | 0 |      |
| 6                                           | 98             | 89  | 36  | 6  |   | 289              | 180 | 104 | 36  | 4  |   |   | 842  |
| 5                                           | 6              | 89  | 31  | 4  |   | 3                | 103 | 61  | 12  | 1  |   |   | 310  |
| 4                                           |                | 5   | 85  | 7  | 1 | 1                | 4   | 44  | 19  | 1  | 2 | 1 | 170  |
| 3                                           |                | 3   | 2   | 81 |   | 1                | 2   | 3   | 40  | 4  | 1 |   | 137  |
| Sum                                         | 104            | 186 | 154 | 98 | 1 | 294              | 289 | 212 | 107 | 10 | 3 | 1 | 1459 |
| Number of differentially regulated isoforms |                |     |     |    |   |                  |     |     |     |    |   |   |      |
| nPatDE                                      | nPat2fold (UP) |     |     |    |   | nPat2fold (DOWN) |     |     |     |    |   |   | Sum  |
|                                             | 6              | 5   | 4   | 3  | 2 | 6                | 5   | 4   | 3   | 2  | 1 | 0 |      |
| 6                                           | 81             | 50  | 18  | 2  |   | 260              | 133 | 52  | 7   | 1  |   |   | 604  |
| 5                                           | 9              | 90  | 21  |    |   | 18               | 132 | 49  | 3   |    |   |   | 322  |
| 4                                           | 3              | 17  | 73  | 1  |   | 10               | 20  | 64  | 14  | 1  |   |   | 203  |
| 3                                           | 3              | 6   | 9   | 76 | 1 | 1                | 18  | 21  | 53  | 2  | 1 |   | 191  |
| Sum                                         | 96             | 163 | 121 | 79 | 1 | 289              | 303 | 186 | 77  | 4  | 1 |   | 1320 |

\* nPatDE = number of patients with differential expression in *edgeR* test (FDR cutoff = 0.01) for each patient

\* nPat2fold = number of patients over two fold expression change



**Table S6. Primer sequences for detecting fusion transcripts**

| <b>Fusion gene</b>    | <b>Primer sequence (5'-3')-F</b> | <b>Primer sequence (5'-3')-R</b> |
|-----------------------|----------------------------------|----------------------------------|
| <i>RHPN2-PEPD</i>     | GGCCGGAGTAAATTGCAGAA             | CGCAGATGCAGGTGTAGGAG             |
| <i>SIRT2-NPHS1</i>    | GGCTGGAACAGGAGGACTTG             | AGCTCTGAGTGTCCCCTCT              |
| <i>COX6C-LAPTM4B</i>  | AACTACCATGGCTCCCGAAGT            | TGCCGTATGTATTCCTGAATGG           |
| <i>MARK4-ERCC2</i>    | GACTACCTCGTGTGCGCATGG            | AGTCGATTCCCTCGGACACTT            |
| <i>NDUF9-PGCP</i>     | CAAGGTCCCAGAATGGTGCT             | AGGCAGCATTCTTCCATGTC             |
| <i>SLC6A9-MORNI</i>   | TGCTCTTGAGATCTGTGGCC             | AGGCTGTCCAGGAACAGGAA             |
| <i>STK2-PTK2</i>      | TCGGATGAAGATGAGCTGGA             | AATACTGGCCAGGTGGTTG              |
| <i>PTK2-FAM84B</i>    | GGCAGCTGCTTACCTTGACC             | AGCTGAAGTTGTGGGCTCCT             |
| <i>PKHD1L1-MATN2</i>  | CGTGGGATCAGGATTCAGTG             | AGGCAGTGGCAGGAATAGGA             |
| <i>MKL1-NIPA1</i>     | CATCTTTCCACCCCTCTTGGT            | AGGAAGCTAAAATGGACCCGA            |
| <i>HSPG2-TMCO4</i>    | CCTACACACGCCACCTGATCT            | TCGGGTTTCAGGAAATAACTGG           |
| <i>NIPAL3-ATAD3B</i>  | TGATTGCCAGTGTGGGCTAC             | TCTGTGGCCGGCTTAAGAAC             |
| <i>UBFD1-CDH11</i>    | CAGGCAGAAACAACACAGGAA            | CCGCAGACTTTGATGGTGAG             |
| <i>SLC7A6-LRRC36</i>  | GCCTGTGGGTCTCACTGCTA             | GCCGGGACTACCAAAGACAG             |
| <i>KDM6A-WSB1</i>     | GTTGATCCCAGCTTTTGTCG             | ACTGTGCGATGTCCTTGTGAC            |
| <i>EIF1AX-PDE4DIP</i> | CTGGCCTCCAGCACCTACTT             | GCTGGTGAGCCTCTCTGTCA             |
| <i>GRHL2-PTPN12</i>   | GCCCATGGAAGAGGAGTTTG             | GTCCTTGGTGGTTTTGGAGG             |
| <i>CCDC6-RET</i>      | CCTGGAGGAGCTCACCAACC             | TACCCTGCTCTGCCTTTCAGA            |
| <i>GLE1-CCBL1</i>     | TCAGCCCTAGATCAACCCTCA            | GCATGAAGTCTCCACTGACAGC           |

**Table S7. Mapping statistics of small RNA-Seq data**

| Sample | Total reads | 3' removed reads | Reads on miRNA     | Unmapped          | Unique reads |
|--------|-------------|------------------|--------------------|-------------------|--------------|
| P1N    | 28,645,348  | 17,741,526       | 12,998,220 (73.3%) | 4,743,306 (26.7%) | 468,113      |
| P1T    | 34,742,127  | 22,193,690       | 17,356,451 (78.2%) | 4,837,239 (21.8%) | 384,296      |
| P3N    | 32,728,775  | 23,684,929       | 15,457,357 (65.3%) | 8,227,572 (34.7%) | 390,295      |
| P3T    | 30,531,469  | 19,386,535       | 14,321,414 (73.9%) | 5,065,121 (26.1%) | 297,653      |
| P4N    | 29,140,944  | 20,325,562       | 14,202,756 (69.9%) | 6,122,806 (30.1%) | 367,457      |
| P4T    | 29,433,890  | 15,214,198       | 10,971,932 (72.1%) | 4,242,266 (27.9%) | 366,762      |
| P5N    | 30,970,140  | 22,981,541       | 16,928,225 (73.7%) | 6,053,316 (26.3%) | 308,108      |
| P5T    | 30,105,887  | 19,611,741       | 15,517,262 (79.1%) | 4,094,479 (20.9%) | 336,814      |
| P6N    | 31,808,386  | 22,587,121       | 16,063,355 (71.1%) | 6,523,766 (28.9%) | 324,151      |
| P6T    | 28,894,660  | 15,240,466       | 11,737,779 (77.0%) | 3,502,687 (22.9%) | 326,881      |
| P8N    | 32,016,524  | 19,651,378       | 13,281,147 (67.6%) | 6,370,231 (32.4%) | 317,851      |
| P8T    | 32,667,150  | 17,044,498       | 13,050,868 (76.6%) | 3,993,630 (23.4%) | 361,839      |

\* N, normal; T, tumor.

**Table S8. List of differentially expressed microRNAs**

| miRNA ID       | FDR      | logFC | nPatDE | nPat2fold | miRNA ID       | FDR      | logFC | nPatDE | nPat2fold |
|----------------|----------|-------|--------|-----------|----------------|----------|-------|--------|-----------|
| hsa-miR-9      | 5.61E-05 | 2.44  | 6      | 5+        | hsa-miR-27a*   | 6.47E-06 | -2.60 | 6      | 6-        |
| hsa-miR-9*     | 6.49E-05 | 2.38  | 6      | 6+        | hsa-miR-30a*   | 3.28E-04 | -2.19 | 6      | 5-        |
| hsa-miR-96     | 3.11E-06 | 2.64  | 6      | 6+        | hsa-miR-30c-2* | 1.24E-04 | -2.30 | 5      | 5-        |
| hsa-miR-127-3p | 4.52E-04 | 2.14  | 6      | 6+        | hsa-miR-126    | 9.23E-07 | -2.79 | 6      | 6-        |
| hsa-miR-134    | 1.55E-04 | 2.31  | 6      | 5+        | hsa-miR-126*   | 2.79E-04 | -2.06 | 6      | 6-        |
| hsa-miR-135b   | 4.01E-07 | 2.90  | 6      | 6+        | hsa-miR-135a   | 1.59E-04 | -2.48 | 6      | 5-        |
| hsa-miR-135b*  | 1.56E-08 | 3.32  | 6      | 6+        | hsa-miR-139-5p | 3.35E-04 | -2.05 | 6      | 6-        |
| hsa-miR-182    | 1.49E-04 | 2.29  | 6      | 5+        | hsa-miR-144    | 7.82E-07 | -2.98 | 6      | 6-        |
| hsa-miR-183    | 8.43E-06 | 2.67  | 6      | 5+        | hsa-miR-144*   | 6.54E-07 | -2.99 | 6      | 5-        |
| hsa-miR-183*   | 1.53E-06 | 2.88  | 6      | 6+        | hsa-miR-206    | 2.10E-07 | -3.54 | 5      | 5-        |
| hsa-miR-205    | 6.79E-08 | 3.57  | 5      | 5+        | hsa-miR-338-5p | 7.94E-06 | -2.58 | 6      | 6-        |
| hsa-miR-210    | 2.49E-04 | 2.16  | 5      | 5+        | hsa-miR-338-3p | 1.05E-04 | -2.30 | 6      | 5-        |
| hsa-miR-301b   | 3.06E-05 | 2.49  | 6      | 6+        | hsa-miR-451    | 1.50E-06 | -2.94 | 6      | 6-        |
| hsa-miR-380*   | 3.19E-05 | 2.76  | 5      | 5+        | hsa-miR-486-5p | 1.17E-07 | -3.26 | 6      | 5-        |
| hsa-miR-409-3p | 7.23E-06 | 2.93  | 5      | 5+        | hsa-miR-486-3p | 1.20E-04 | -2.46 | 5      | 5-        |
| hsa-miR-410    | 4.52E-04 | 2.33  | 6      | 5+        | hsa-miR-584    | 8.48E-05 | -2.37 | 6      | 5-        |
| hsa-miR-432    | 4.52E-04 | 2.24  | 5      | 5+        | hsa-miR-4532   | 8.85E-05 | -2.37 | 6      | 5-        |
| hsa-miR-493    | 3.23E-04 | 2.19  | 5      | 5+        |                |          |       |        |           |
| hsa-miR-495    | 8.48E-05 | 2.48  | 5      | 5+        |                |          |       |        |           |
| hsa-miR-877    | 2.67E-04 | 2.22  | 5      | 5+        |                |          |       |        |           |
| hsa-miR-889    | 9.06E-04 | 2.12  | 5      | 5+        |                |          |       |        |           |
| hsa-miR-1246   | 2.14E-04 | 2.55  | 4      | 5+        |                |          |       |        |           |
| hsa-miR-1269   | 1.87E-18 | 9.48  | 6      | 3+        |                |          |       |        |           |

\* FDR, log<sub>2</sub>FC(fold change) from *edgeR* program

\* nPatDE = number of patients with differential expression in *edgeR* test (FDR cutoff = 0.01) for each patient

\* nPat2fold = number of patients over two fold expression change (+,- indicates up- or downregulation in tumor tissue)

**Table S9. Inversely correlated microRNA-target relations**

| microRNA*      | DEG Name        | miRNA exp<br>log <sub>2</sub> FC | DEG exp<br>log <sub>2</sub> FC | Pearson<br>Correlation | P-value for<br>Correlation | Validation** |
|----------------|-----------------|----------------------------------|--------------------------------|------------------------|----------------------------|--------------|
| hsa-miR-126    | <i>SOX2</i>     | -2.790                           | 1.739                          | -0.594                 | 0.041                      | O            |
| hsa-miR-126*   | <i>EPHB2</i>    | -2.060                           | 1.891                          | -0.657                 | 0.020                      | O            |
| hsa-miR-139-5p | <i>ARHGEF38</i> | -2.048                           | 1.718                          | -0.707                 | 0.010                      | X            |
| hsa-miR-139-5p | <i>ENC1</i>     | -2.048                           | 1.778                          | -0.628                 | 0.029                      | X            |
| hsa-miR-139-5p | <i>GALNT7</i>   | -2.048                           | 2.070                          | -0.707                 | 0.010                      | X            |
| hsa-miR-139-5p | <i>MEX3A</i>    | -2.048                           | 2.265                          | -0.635                 | 0.027                      | X            |
| hsa-miR-139-5p | <i>POF1B</i>    | -2.048                           | 2.785                          | -0.656                 | 0.021                      | X            |
| hsa-miR-139-5p | <i>TMEM184A</i> | -2.048                           | 1.861                          | -0.754                 | 0.005                      | X            |
| hsa-miR-27a*   | <i>PKMYT1</i>   | -2.595                           | 1.818                          | -0.638                 | 0.026                      | O            |
| hsa-miR-30a*   | <i>MYBL2</i>    | -2.189                           | 2.029                          | -0.625                 | 0.030                      | O            |
| hsa-miR-30c-2* | <i>MYBL2</i>    | -2.299                           | 2.029                          | -0.685                 | 0.014                      | O            |
| hsa-miR-338-3p | <i>BCL2L15</i>  | -2.298                           | 2.763                          | -0.688                 | 0.013                      | X            |
| hsa-miR-338-3p | <i>FBXO32</i>   | -2.298                           | 2.267                          | -0.770                 | 0.003                      | X            |
| hsa-miR-338-3p | <i>GPT2</i>     | -2.298                           | 2.293                          | -0.818                 | 0.001                      | X            |
| hsa-miR-338-3p | <i>MACC1</i>    | -2.298                           | 1.696                          | -0.688                 | 0.013                      | X            |
| hsa-miR-338-3p | <i>NHS</i>      | -2.298                           | 2.990                          | -0.713                 | 0.009                      | X            |
| hsa-miR-338-3p | <i>RASAL1</i>   | -2.298                           | 4.046                          | -0.638                 | 0.026                      | X            |
| hsa-miR-338-3p | <i>SOX4</i>     | -2.298                           | 1.470                          | -0.718                 | 0.009                      | X            |
| hsa-miR-338-5p | <i>CDCA8</i>    | -2.577                           | 2.072                          | -0.627                 | 0.029                      | X            |
| hsa-miR-338-5p | <i>ERO1L</i>    | -2.577                           | 2.001                          | -0.727                 | 0.007                      | X            |
| hsa-miR-338-5p | <i>ESRP1</i>    | -2.577                           | 1.381                          | -0.659                 | 0.020                      | X            |
| hsa-miR-338-5p | <i>HMGB3</i>    | -2.577                           | 2.708                          | -0.595                 | 0.041                      | X            |
| hsa-miR-338-5p | <i>HOXB2</i>    | -2.577                           | 1.554                          | -0.634                 | 0.027                      | X            |
| hsa-miR-338-5p | <i>SIX1</i>     | -2.577                           | 3.695                          | -0.735                 | 0.006                      | X            |
| hsa-miR-486-3p | <i>IGSF9</i>    | -2.454                           | 1.884                          | -0.658                 | 0.020                      | X            |
| hsa-miR-486-3p | <i>PPP1R14B</i> | -2.454                           | 1.325                          | -0.697                 | 0.012                      | X            |
| hsa-miR-486-3p | <i>SBK1</i>     | -2.454                           | 2.228                          | -0.650                 | 0.022                      | X            |
| hsa-let-7a     | <i>EPHB2</i>    | -0.957                           | 1.891                          | -0.915                 | 0.000                      | O            |
| hsa-let-7a     | <i>HOXA10</i>   | -0.957                           | 3.500                          | -0.595                 | 0.041                      | O            |
| hsa-let-7a     | <i>NCAPG</i>    | -0.957                           | 1.859                          | -0.680                 | 0.015                      | O            |
| hsa-let-7a     | <i>RET</i>      | -0.957                           | 2.220                          | -0.578                 | 0.049                      | O            |
| hsa-let-7b     | <i>AURKB</i>    | -1.138                           | 1.375                          | -0.636                 | 0.026                      | O            |
| hsa-let-7b     | <i>EPHB2</i>    | -1.138                           | 1.891                          | -0.793                 | 0.002                      | O            |
| hsa-let-7b     | <i>GALNT7</i>   | -1.138                           | 2.070                          | -0.712                 | 0.009                      | O            |
| hsa-let-7b     | <i>IQGAP3</i>   | -1.138                           | 2.118                          | -0.627                 | 0.029                      | O            |
| hsa-let-7b     | <i>KCNN4</i>    | -1.138                           | 2.746                          | -0.595                 | 0.041                      | O            |
| hsa-let-7b     | <i>MSI2</i>     | -1.138                           | 1.475                          | -0.691                 | 0.013                      | O            |
| hsa-let-7b     | <i>NCAPG</i>    | -1.138                           | 1.859                          | -0.579                 | 0.049                      | O            |
| hsa-let-7b     | <i>NT5E</i>     | -1.138                           | 1.937                          | -0.577                 | 0.049                      | O            |
| hsa-let-7b     | <i>PSAT1</i>    | -1.138                           | 2.233                          | -0.711                 | 0.010                      | O            |
| hsa-let-7b     | <i>RET</i>      | -1.138                           | 2.220                          | -0.542                 | 0.069                      | O            |

|               |                |        |        |        |       |   |
|---------------|----------------|--------|--------|--------|-------|---|
| hsa-let-7b    | <i>TMED3</i>   | -1.138 | 1.359  | -0.628 | 0.029 | O |
| hsa-let-7b    | <i>TRIP13</i>  | -1.138 | 1.789  | -0.582 | 0.047 | O |
| hsa-let-7b    | <i>UHRF1</i>   | -1.138 | 1.883  | -0.626 | 0.029 | O |
| hsa-miR-1     | <i>CENPF</i>   | -1.669 | 2.106  | -0.631 | 0.028 | O |
| hsa-miR-1     | <i>RHOV</i>    | -1.669 | 3.142  | -0.695 | 0.012 | O |
| hsa-miR-1     | <i>TRIM2</i>   | -1.669 | 1.891  | -0.577 | 0.049 | O |
| hsa-miR-1     | <i>UHRF1</i>   | -1.669 | 1.883  | -0.725 | 0.008 | O |
| hsa-miR-138   | <i>VCAN</i>    | -1.746 | 1.407  | -0.700 | 0.011 | O |
| hsa-miR-148a* | <i>BAALC</i>   | 1.428  | -2.662 | -0.637 | 0.026 | O |
| hsa-miR-148a* | <i>EPAS1</i>   | 1.428  | -2.882 | -0.709 | 0.010 | O |
| hsa-miR-148a* | <i>ERG</i>     | 1.428  | -1.885 | -0.749 | 0.005 | O |
| hsa-miR-148a* | <i>HLA-E</i>   | 1.428  | -1.350 | -0.685 | 0.014 | O |
| hsa-miR-148a* | <i>MYC</i>     | 1.428  | -1.782 | -0.611 | 0.035 | O |
| hsa-miR-203   | <i>BIRC5</i>   | -1.610 | 1.961  | -0.642 | 0.024 | O |
| hsa-miR-21    | <i>ADRB2</i>   | 1.730  | -2.378 | -0.824 | 0.001 | O |
| hsa-miR-21    | <i>CDKN1C</i>  | 1.730  | -1.396 | -0.691 | 0.013 | O |
| hsa-miR-21    | <i>CXCL3</i>   | 1.730  | -3.048 | -0.680 | 0.015 | O |
| hsa-miR-21    | <i>EGFL7</i>   | 1.730  | -2.410 | -0.660 | 0.020 | O |
| hsa-miR-21    | <i>EGR1</i>    | 1.730  | -2.240 | -0.756 | 0.004 | O |
| hsa-miR-21    | <i>FOS</i>     | 1.730  | -2.071 | -0.613 | 0.034 | O |
| hsa-miR-21    | <i>HSPB6</i>   | 1.730  | -2.074 | -0.746 | 0.005 | O |
| hsa-miR-21    | <i>PRKCE</i>   | 1.730  | -1.947 | -0.775 | 0.003 | O |
| hsa-miR-21    | <i>RECK</i>    | 1.730  | -1.571 | -0.770 | 0.003 | O |
| hsa-miR-21    | <i>RHOB</i>    | 1.730  | -1.474 | -0.720 | 0.008 | O |
| hsa-miR-21    | <i>SEMA6A</i>  | 1.730  | -2.921 | -0.802 | 0.002 | O |
| hsa-miR-21    | <i>SOCS3</i>   | 1.730  | -2.082 | -0.671 | 0.017 | O |
| hsa-miR-21    | <i>TCF21</i>   | 1.730  | -2.936 | -0.681 | 0.015 | O |
| hsa-miR-21    | <i>TGFBR3</i>  | 1.730  | -2.416 | -0.821 | 0.001 | O |
| hsa-miR-21    | <i>TIMP3</i>   | 1.730  | -1.602 | -0.730 | 0.007 | O |
| hsa-miR-21    | <i>WFS1</i>    | 1.730  | -1.437 | -0.680 | 0.015 | O |
| hsa-miR-218   | <i>BIRC5</i>   | -1.556 | 1.961  | -0.584 | 0.046 | O |
| hsa-miR-224   | <i>FOSB</i>    | 1.689  | -3.776 | -0.685 | 0.014 | O |
| hsa-miR-224   | <i>JUNB</i>    | 1.689  | -2.162 | -0.660 | 0.019 | O |
| hsa-miR-30a   | <i>SLC6A3</i>  | -1.742 | 3.060  | -0.589 | 0.044 | O |
| hsa-miR-30b*  | <i>MYBL2</i>   | -1.092 | 2.029  | -0.784 | 0.003 | O |
| hsa-miR-34a   | <i>CRIMI</i>   | 1.126  | -1.384 | -0.618 | 0.032 | O |
| hsa-miR-375   | <i>BDNF</i>    | 1.385  | -3.438 | -0.601 | 0.039 | O |
| hsa-miR-375   | <i>FABP4</i>   | 1.385  | -3.066 | -0.580 | 0.048 | O |
| hsa-miR-375   | <i>PPARG</i>   | 1.385  | -1.399 | -0.632 | 0.028 | O |
| hsa-miR-135b  | <i>ARC</i>     | 2.905  | -4.397 | -0.700 | 0.011 | X |
| hsa-miR-135b  | <i>ARHGAP6</i> | 2.905  | -2.177 | -0.764 | 0.004 | X |
| hsa-miR-135b  | <i>ARHGEF4</i> | 2.905  | -2.477 | -0.686 | 0.014 | X |
| hsa-miR-135b  | <i>BMPER</i>   | 2.905  | -3.268 | -0.663 | 0.019 | X |
| hsa-miR-135b  | <i>EFNB2</i>   | 2.905  | -1.379 | -0.735 | 0.007 | X |

|              |                  |       |        |        |       |   |
|--------------|------------------|-------|--------|--------|-------|---|
| hsa-miR-135b | <i>FERMT2</i>    | 2.905 | -1.375 | -0.788 | 0.002 | X |
| hsa-miR-135b | <i>GHR</i>       | 2.905 | -1.788 | -0.712 | 0.009 | X |
| hsa-miR-135b | <i>GRK5</i>      | 2.905 | -2.511 | -0.782 | 0.003 | X |
| hsa-miR-135b | <i>KIAA1324L</i> | 2.905 | -1.605 | -0.637 | 0.026 | X |
| hsa-miR-135b | <i>KLF13</i>     | 2.905 | -1.384 | -0.721 | 0.008 | X |
| hsa-miR-135b | <i>KLF4</i>      | 2.905 | -3.234 | -0.759 | 0.004 | O |
| hsa-miR-135b | <i>LATS2</i>     | 2.905 | -1.296 | -0.762 | 0.004 | X |
| hsa-miR-135b | <i>LDB2</i>      | 2.905 | -2.454 | -0.759 | 0.004 | X |
| hsa-miR-135b | <i>LRCH2</i>     | 2.905 | -1.368 | -0.702 | 0.011 | X |
| hsa-miR-135b | <i>MASP1</i>     | 2.905 | -3.558 | -0.696 | 0.012 | X |
| hsa-miR-135b | <i>MSRB3</i>     | 2.905 | -1.365 | -0.677 | 0.016 | X |
| hsa-miR-135b | <i>NDRG4</i>     | 2.905 | -3.020 | -0.614 | 0.034 | X |
| hsa-miR-135b | <i>NTNG1</i>     | 2.905 | -2.765 | -0.750 | 0.005 | X |
| hsa-miR-135b | <i>PHLDB2</i>    | 2.905 | -1.385 | -0.769 | 0.003 | X |
| hsa-miR-135b | <i>PHOSPHO1</i>  | 2.905 | -2.645 | -0.725 | 0.008 | X |
| hsa-miR-135b | <i>PITPNM2</i>   | 2.905 | -1.304 | -0.686 | 0.014 | X |
| hsa-miR-135b | <i>RECK</i>      | 2.905 | -1.571 | -0.674 | 0.016 | X |
| hsa-miR-135b | <i>SLC6A4</i>    | 2.905 | -6.677 | -0.576 | 0.050 | X |
| hsa-miR-135b | <i>SPTBN1</i>    | 2.905 | -1.841 | -0.723 | 0.008 | X |
| hsa-miR-135b | <i>TRPC6</i>     | 2.905 | -1.357 | -0.691 | 0.013 | X |
| hsa-miR-182  | <i>AATK</i>      | 2.286 | -2.766 | -0.583 | 0.046 | X |
| hsa-miR-182  | <i>ANGPTL1</i>   | 2.286 | -2.520 | -0.687 | 0.013 | X |
| hsa-miR-182  | <i>APLN</i>      | 2.286 | -2.899 | -0.666 | 0.018 | X |
| hsa-miR-182  | <i>ARHGAP29</i>  | 2.286 | -1.512 | -0.757 | 0.004 | X |
| hsa-miR-182  | <i>ATOH8</i>     | 2.286 | -2.939 | -0.633 | 0.027 | X |
| hsa-miR-182  | <i>BDNF</i>      | 2.286 | -3.438 | -0.676 | 0.016 | X |
| hsa-miR-182  | <i>C10orf54</i>  | 2.286 | -1.894 | -0.625 | 0.030 | X |
| hsa-miR-182  | <i>C13orf36</i>  | 2.286 | -5.180 | -0.633 | 0.027 | X |
| hsa-miR-182  | <i>CACNA2D2</i>  | 2.286 | -1.805 | -0.610 | 0.035 | X |
| hsa-miR-182  | <i>CBFA2T3</i>   | 2.286 | -1.740 | -0.691 | 0.013 | X |
| hsa-miR-182  | <i>CLIC5</i>     | 2.286 | -2.774 | -0.737 | 0.006 | X |
| hsa-miR-182  | <i>DKK2</i>      | 2.286 | -1.432 | -0.720 | 0.008 | X |
| hsa-miR-182  | <i>DOCK4</i>     | 2.286 | -1.304 | -0.789 | 0.002 | X |
| hsa-miR-182  | <i>EDNRB</i>     | 2.286 | -2.962 | -0.629 | 0.028 | X |
| hsa-miR-182  | <i>EFNB2</i>     | 2.286 | -1.379 | -0.754 | 0.005 | X |
| hsa-miR-182  | <i>EGR3</i>      | 2.286 | -2.181 | -0.720 | 0.008 | X |
| hsa-miR-182  | <i>ELMO1</i>     | 2.286 | -1.483 | -0.667 | 0.018 | X |
| hsa-miR-182  | <i>EPAS1</i>     | 2.286 | -2.882 | -0.667 | 0.018 | X |
| hsa-miR-182  | <i>ERG</i>       | 2.286 | -1.885 | -0.843 | 0.001 | X |
| hsa-miR-182  | <i>FAM107A</i>   | 2.286 | -4.328 | -0.639 | 0.025 | X |
| hsa-miR-182  | <i>FAM167A</i>   | 2.286 | -1.634 | -0.583 | 0.047 | X |
| hsa-miR-182  | <i>FAM43A</i>    | 2.286 | -1.988 | -0.624 | 0.030 | X |
| hsa-miR-182  | <i>FIGF</i>      | 2.286 | -3.573 | -0.734 | 0.007 | X |
| hsa-miR-182  | <i>FOSL2</i>     | 2.286 | -1.381 | -0.692 | 0.013 | X |

|             |                        |       |        |        |       |   |
|-------------|------------------------|-------|--------|--------|-------|---|
| hsa-miR-182 | <i>FOXF2</i>           | 2.286 | -2.232 | -0.641 | 0.025 | X |
| hsa-miR-182 | <i>GPC3</i>            | 2.286 | -2.732 | -0.649 | 0.022 | X |
| hsa-miR-182 | <i>GRIA1</i>           | 2.286 | -4.300 | -0.763 | 0.004 | X |
| hsa-miR-182 | <i>HBEGF</i>           | 2.286 | -2.880 | -0.625 | 0.030 | X |
| hsa-miR-182 | <i>IGSF10</i>          | 2.286 | -2.945 | -0.681 | 0.015 | X |
| hsa-miR-182 | <i>KIAA1324L</i>       | 2.286 | -1.605 | -0.655 | 0.021 | X |
| hsa-miR-182 | <i>KIF26A</i>          | 2.286 | -2.337 | -0.627 | 0.029 | X |
| hsa-miR-182 | <i>KLF13</i>           | 2.286 | -1.384 | -0.672 | 0.017 | X |
| hsa-miR-182 | <i>LIMCH1</i>          | 2.286 | -1.528 | -0.602 | 0.038 | X |
| hsa-miR-182 | <i>LPHN2</i>           | 2.286 | -2.529 | -0.763 | 0.004 | X |
| hsa-miR-182 | <i>LRCH2</i>           | 2.286 | -1.368 | -0.879 | 0.000 | X |
| hsa-miR-182 | <i>MYADM</i>           | 2.286 | -2.089 | -0.725 | 0.008 | X |
| hsa-miR-182 | <i>NFASC</i>           | 2.286 | -1.720 | -0.601 | 0.039 | X |
| hsa-miR-182 | <i>NR4A3</i>           | 2.286 | -3.354 | -0.655 | 0.021 | X |
| hsa-miR-182 | <i>NRN1</i>            | 2.286 | -1.921 | -0.645 | 0.024 | X |
| hsa-miR-182 | <i>PDK4</i>            | 2.286 | -2.396 | -0.663 | 0.019 | X |
| hsa-miR-182 | <i>PDZD2</i>           | 2.286 | -1.931 | -0.652 | 0.022 | X |
| hsa-miR-182 | <i>PDZD4</i>           | 2.286 | -1.776 | -0.710 | 0.010 | X |
| hsa-miR-182 | <i>PID1</i>            | 2.286 | -1.743 | -0.631 | 0.028 | X |
| hsa-miR-182 | <i>PPM1F</i>           | 2.286 | -1.772 | -0.717 | 0.009 | X |
| hsa-miR-182 | <i>PRKCE</i>           | 2.286 | -1.947 | -0.620 | 0.031 | X |
| hsa-miR-182 | <i>RECK</i>            | 2.286 | -1.571 | -0.783 | 0.003 | X |
| hsa-miR-182 | <i>RHOJ</i>            | 2.286 | -2.033 | -0.746 | 0.005 | X |
| hsa-miR-182 | <i>SEMA5A</i>          | 2.286 | -1.991 | -0.755 | 0.005 | X |
| hsa-miR-182 | <i>SH3BP5</i>          | 2.286 | -1.655 | -0.812 | 0.001 | X |
| hsa-miR-182 | <i>SIK1</i>            | 2.286 | -2.382 | -0.699 | 0.011 | X |
| hsa-miR-182 | <i>ST6GALNA<br/>C3</i> | 2.286 | -1.902 | -0.700 | 0.011 | X |
| hsa-miR-182 | <i>STARD13</i>         | 2.286 | -1.757 | -0.804 | 0.002 | X |
| hsa-miR-182 | <i>TACC1</i>           | 2.286 | -1.302 | -0.700 | 0.011 | X |
| hsa-miR-182 | <i>TBXA2R</i>          | 2.286 | -2.278 | -0.684 | 0.014 | X |
| hsa-miR-182 | <i>TNF</i>             | 2.286 | -1.524 | -0.649 | 0.022 | O |
| hsa-miR-182 | <i>TNS1</i>            | 2.286 | -1.681 | -0.634 | 0.027 | X |
| hsa-miR-182 | <i>TOX2</i>            | 2.286 | -2.405 | -0.648 | 0.023 | X |
| hsa-miR-182 | <i>VGLL3</i>           | 2.286 | -1.408 | -0.675 | 0.016 | X |
| hsa-miR-182 | <i>WWC2</i>            | 2.286 | -1.631 | -0.722 | 0.008 | X |
| hsa-miR-182 | <i>ZFP36</i>           | 2.286 | -2.441 | -0.620 | 0.031 | X |
| hsa-miR-183 | <i>AKAP12</i>          | 2.674 | -2.076 | -0.661 | 0.019 | O |
| hsa-miR-183 | <i>CYR1</i>            | 2.674 | -1.829 | -0.650 | 0.022 | X |
| hsa-miR-183 | <i>EGR1</i>            | 2.674 | -2.240 | -0.588 | 0.044 | O |
| hsa-miR-183 | <i>KHDRBS2</i>         | 2.674 | -2.691 | -0.697 | 0.012 | X |
| hsa-miR-183 | <i>KLF4</i>            | 2.674 | -3.234 | -0.685 | 0.014 | O |
| hsa-miR-183 | <i>MAPK4</i>           | 2.674 | -2.169 | -0.597 | 0.040 | X |
| hsa-miR-183 | <i>NR4A2</i>           | 2.674 | -2.820 | -0.655 | 0.021 | X |
| hsa-miR-183 | <i>PKNOX2</i>          | 2.674 | -2.532 | -0.603 | 0.038 | X |

|             |                 |       |        |        |       |   |
|-------------|-----------------|-------|--------|--------|-------|---|
| hsa-miR-205 | <i>MFNG</i>     | 3.566 | -1.653 | -0.646 | 0.023 | X |
| hsa-miR-210 | <i>BDNF</i>     | 2.158 | -3.438 | -0.625 | 0.030 | O |
| hsa-miR-210 | <i>COX4I2</i>   | 2.158 | -3.098 | -0.663 | 0.019 | O |
| hsa-miR-210 | <i>MDGA1</i>    | 2.158 | -2.121 | -0.592 | 0.043 | O |
| hsa-miR-210 | <i>PECAM1</i>   | 2.158 | -1.995 | -0.760 | 0.004 | O |
| hsa-miR-493 | <i>ANKRD29</i>  | 2.187 | -2.770 | -0.677 | 0.016 | X |
| hsa-miR-493 | <i>SLC2A3</i>   | 2.187 | -1.876 | -0.578 | 0.049 | X |
| hsa-miR-877 | <i>FAM167A</i>  | 2.221 | -1.634 | -0.608 | 0.036 | X |
| hsa-miR-9   | <i>CRIM1</i>    | 2.441 | -1.384 | -0.584 | 0.046 | X |
| hsa-miR-9   | <i>ERG</i>      | 2.441 | -1.885 | -0.608 | 0.036 | X |
| hsa-miR-9   | <i>MME</i>      | 2.441 | -2.237 | -0.614 | 0.034 | X |
| hsa-miR-9   | <i>STARD13</i>  | 2.441 | -1.757 | -0.615 | 0.033 | X |
| hsa-miR-96  | <i>ARHGAP29</i> | 2.641 | -1.512 | -0.621 | 0.031 | X |
| hsa-miR-96  | <i>ARHGAP6</i>  | 2.641 | -2.177 | -0.595 | 0.041 | X |
| hsa-miR-96  | <i>CLIC5</i>    | 2.641 | -2.774 | -0.664 | 0.019 | X |
| hsa-miR-96  | <i>COL13A1</i>  | 2.641 | -1.450 | -0.599 | 0.040 | X |
| hsa-miR-96  | <i>CSRNP1</i>   | 2.641 | -2.793 | -0.578 | 0.049 | X |
| hsa-miR-96  | <i>DOCK4</i>    | 2.641 | -1.304 | -0.634 | 0.027 | X |
| hsa-miR-96  | <i>ERG</i>      | 2.641 | -1.885 | -0.687 | 0.014 | X |
| hsa-miR-96  | <i>GPM6A</i>    | 2.641 | -4.222 | -0.614 | 0.034 | X |
| hsa-miR-96  | <i>GRIA1</i>    | 2.641 | -4.300 | -0.594 | 0.042 | X |
| hsa-miR-96  | <i>LPHN2</i>    | 2.641 | -2.529 | -0.648 | 0.023 | X |
| hsa-miR-96  | <i>LRCH2</i>    | 2.641 | -1.368 | -0.683 | 0.014 | X |
| hsa-miR-96  | <i>NDUFA4L2</i> | 2.641 | -1.357 | -0.588 | 0.044 | X |
| hsa-miR-96  | <i>PPM1F</i>    | 2.641 | -1.772 | -0.582 | 0.047 | X |
| hsa-miR-96  | <i>RAPGEF4</i>  | 2.641 | -1.872 | -0.702 | 0.011 | X |
| hsa-miR-96  | <i>RECK</i>     | 2.641 | -1.571 | -0.583 | 0.047 | X |
| hsa-miR-96  | <i>SEMA5A</i>   | 2.641 | -1.991 | -0.656 | 0.021 | X |
| hsa-miR-96  | <i>SEMA6A</i>   | 2.641 | -2.921 | -0.615 | 0.033 | X |
| hsa-miR-96  | <i>SH3BP5</i>   | 2.641 | -1.655 | -0.640 | 0.025 | X |
| hsa-miR-96  | <i>STC2</i>     | 2.641 | -1.563 | -0.670 | 0.017 | X |

\* Red, blue indicate the up- and downregulated DEmiRs. Non-DEmiRs are shown in black.

\*\* O=validated target in the literature, X=predicted target of DEmiR.



**Table S10. Number of genes with copy number variations outside 1.62-2.46 for each patient**

|        | Gain/Loss | P1  | P3  | P4  | P5  | P6  | P8  |
|--------|-----------|-----|-----|-----|-----|-----|-----|
| Gene   | Gain      | 298 | 187 | 184 | 106 | 726 | 390 |
|        | Loss      | 346 | 151 | 158 | 156 | 304 | 303 |
| Region | Gain      | 38  | 80  | 46  | 142 | 109 | 81  |
|        | Loss      | 41  | 87  | 44  | 124 | 49  | 87  |

**Table S11. Chromosomal gains and losses in previously published papers and in present study**

|        | Kim <i>et al.</i> 2005              | Garnis <i>et al.</i> 2006          | Choi <i>et al.</i> 2006                                                                                       | Weir <i>et al.</i> 2007                                                    | Job <i>et al.</i> 2010                                                                                                                                                                                      | Present Study                             |
|--------|-------------------------------------|------------------------------------|---------------------------------------------------------------------------------------------------------------|----------------------------------------------------------------------------|-------------------------------------------------------------------------------------------------------------------------------------------------------------------------------------------------------------|-------------------------------------------|
|        | Array-CGH                           | Array-CGH                          | Array-CGH                                                                                                     | SNP array                                                                  | Array-CGH                                                                                                                                                                                                   | Array-CGH                                 |
|        | n=50                                | n= 28 (28 cell lines)              | n=15                                                                                                          | n=371                                                                      | n=60                                                                                                                                                                                                        | n=6                                       |
|        | NSCLC including 21 adenocarcinomas  | NSCLC including 18 adenocarcinomas | Lung adenocarcinoma                                                                                           | Adenocarcinomas                                                            | Adenocarcinomas                                                                                                                                                                                             | NSCLC                                     |
|        | Unknown smoking status              | 2 never smokers                    | Unknown smoking status                                                                                        | The number of never smokers was not reported in the 371 cases <sup>7</sup> | 60 never smokers                                                                                                                                                                                            | 6 never smokers                           |
| Gains  | 1q, 3q, 5p, 17p, 19p, 19q, 20q, 22q | 1q, 2p, 5p, 7p, 8q, 20q            | 1p36.33, 2q35, 5q35.3, 7p15.2, 7q35, 8q24.3, 11p15.4, 16p13.3, 17q25.3, 19q13.42, 20q13.33, 21q22.3, 22q13.33 | 1q, 5p, 6p, 7p, 7q, 8q, 16p, 17q, 20p, 20q                                 | 1q21.1, 1q21.2, 1q21.3, 1q32.1, 2p21, 5p15.33, 5p15.32, 5p12-5p11, 5q11.2, 5q35.2-5q35.3, 5q35.3, 7p11.2, 7q11.2, 8q24.21, 8q24.23, 12p11.21, 12q15, 14q13.2-14q21.1, 18p11.32, 20q13.2, 20q13.31, 20q13.33 | 5p, 10q26, 8q22, 8q23, 8q24, 16p13, 20q13 |
| Losses | 3p, 4q, 9p, 17p, Yp, Yq             | 3p, 4q, 8p, 9p, 10p, 13q, 18q      | 1p21.1, 1q31.2, 2p16.3-2p16.2, 4q35.1, 5q13.1, 7p12.3, 9p11.2, 11p15.1, 11q12.2, 13q33.1, 14q32.33, 19p13.    | 3p, 5q, 6q, 8p, 9p, 9q, 10q, 12p, 13q, 15q, 17p, 18q, 19p, 19q, 21q, 22q   | 1p22.1, 3q11.2, 6q11.1, 8q11.22, 8q11.23, 9p21.3, 9q21.13, 16q23.1, 20p12.1                                                                                                                                 | 1p12, 1p13, 9p21                          |

**Table S12. Correlations between copy number variations and RNA expression**

| Gene ID         | RNA exp.<br>Mean of log2(FC) | CNV change<br>Mean of log2(FC) | Pearson<br>corr. Coefficient |
|-----------------|------------------------------|--------------------------------|------------------------------|
| <i>PTP4A3</i>   | 0.606                        | 0.409                          | 0.984                        |
| <i>RHPN1</i>    | 1.736                        | 0.315                          | 0.980                        |
| <i>NSMCE2</i>   | 0.793                        | 0.304                          | 0.978                        |
| <i>KIAA0196</i> | 0.713                        | 0.296                          | 0.977                        |
| <i>ZNF572</i>   | 0.950                        | 0.296                          | 0.962                        |
| <i>NIPAL2</i>   | 0.948                        | 0.271                          | 0.960                        |
| <i>NDUFB9</i>   | 0.746                        | 0.371                          | 0.957                        |
| <i>HRSPI2</i>   | 1.204                        | 0.235                          | 0.955                        |
| <i>SLC39A4</i>  | 1.172                        | 0.299                          | 0.951                        |
| <i>MTERFD1</i>  | 0.875                        | 0.254                          | 0.939                        |
| <i>PHF20L1</i>  | 0.774                        | 0.321                          | 0.931                        |
| <i>STK3</i>     | 1.013                        | 0.269                          | 0.930                        |
| <i>FAM91A1</i>  | 1.023                        | 0.277                          | 0.929                        |
| <i>CHRAC1</i>   | 0.608                        | 0.268                          | 0.922                        |
| <i>C8orf51</i>  | 1.074                        | 0.315                          | 0.920                        |
| <i>FBXL6</i>    | 1.018                        | 0.299                          | 0.919                        |
| <i>ATAD2</i>    | 1.332                        | 0.227                          | 0.910                        |
| <i>RPL30</i>    | 0.657                        | 0.235                          | 0.909                        |
| <i>POLR2K</i>   | 0.804                        | 0.261                          | 0.904                        |
| <i>ZNF706</i>   | 0.589                        | 0.230                          | 0.902                        |
| <i>C8orf76</i>  | 1.297                        | 0.262                          | 0.900                        |
| <i>GPR172A</i>  | 1.105                        | 0.299                          | 0.899                        |
| <i>RNF139</i>   | 0.417                        | 0.212                          | 0.898                        |
| <i>C8orf47</i>  | 2.438                        | 0.235                          | 0.894                        |
| <i>TOP1MT</i>   | 0.927                        | 0.329                          | 0.890                        |
| <i>WDYHVI</i>   | 0.549                        | 0.227                          | 0.885                        |
| <i>SLC16A1</i>  | -0.334                       | -0.282                         | 0.884                        |
| <i>NUDCD1</i>   | 0.894                        | 0.259                          | 0.880                        |
| <i>YWHAZ</i>    | 0.984                        | 0.231                          | 0.879                        |
| <i>JRK</i>      | 0.448                        | 0.378                          | 0.878                        |
| <i>ZHX1</i>     | 0.405                        | 0.245                          | 0.869                        |
| <i>FAM84B</i>   | 1.249                        | 0.332                          | 0.864                        |
| <i>PPP1R16A</i> | 0.750                        | 0.299                          | 0.858                        |
| <i>SQLE</i>     | 0.866                        | 0.296                          | 0.855                        |
| <i>DERL1</i>    | 0.825                        | 0.273                          | 0.854                        |
| <i>TATDN1</i>   | 0.984                        | 0.291                          | 0.850                        |
| <i>LRIG2</i>    | 0.031                        | -0.261                         | 0.842                        |
| <i>TSTA3</i>    | 1.067                        | 0.257                          | 0.840                        |
| <i>COX6C</i>    | 0.866                        | 0.254                          | 0.838                        |
| <i>TRMT12</i>   | 0.557                        | 0.212                          | 0.837                        |
| <i>C8orf73</i>  | 1.972                        | 0.315                          | 0.837                        |

|                     |        |       |       |
|---------------------|--------|-------|-------|
| <i>CPSF1</i>        | 0.772  | 0.299 | 0.837 |
| <i>ANKRD46</i>      | 0.429  | 0.282 | 0.836 |
| <i>TMEM65</i>       | 0.714  | 0.212 | 0.835 |
| <i>TSNARE1</i>      | 0.567  | 0.382 | 0.833 |
| <i>EBAG9</i>        | 0.931  | 0.338 | 0.832 |
| <i>TMEM74</i>       | 0.466  | 0.351 | 0.830 |
| <i>ADCK5</i>        | 1.167  | 0.299 | 0.820 |
| <i>ARHGAP39</i>     | 0.834  | 0.299 | 0.810 |
| <i>TRAPPC9</i>      | 0.671  | 0.326 | 0.807 |
| <i>LY6D</i>         | 3.738  | 0.378 | 0.803 |
| <i>PYCRL</i>        | 0.893  | 0.257 | 0.802 |
| <i>FAM83A</i>       | 4.318  | 0.262 | 0.798 |
| <i>PTDSS1</i>       | 0.243  | 0.254 | 0.797 |
| <i>VPS28</i>        | 0.215  | 0.299 | 0.796 |
| <i>ZC3H3</i>        | 0.460  | 0.315 | 0.791 |
| <i>PTK2</i>         | 0.867  | 0.286 | 0.789 |
| <i>KIFC2</i>        | 0.845  | 0.299 | 0.788 |
| <i>FAM49B</i>       | 0.720  | 0.210 | 0.786 |
| <i>RNF19A</i>       | 0.907  | 0.245 | 0.786 |
| <i>PABPC1</i>       | 1.240  | 0.279 | 0.782 |
| <i>ZNF251</i>       | 0.669  | 0.278 | 0.759 |
| <i>FOXH1</i>        | 0.164  | 0.299 | 0.754 |
| <i>ANXA13</i>       | 0.836  | 0.288 | 0.753 |
| <i>ZNF696</i>       | 0.540  | 0.329 | 0.751 |
| <i>ENY2</i>         | 0.749  | 0.338 | 0.748 |
| <i>BAI1</i>         | 0.195  | 0.397 | 0.743 |
| <i>C8orf55</i>      | 1.001  | 0.378 | 0.739 |
| <i>GSDMD</i>        | 0.241  | 0.315 | 0.731 |
| <i>RECQL4</i>       | 1.204  | 0.299 | 0.722 |
| <i>PVT1</i>         | 1.617  | 0.342 | 0.713 |
| <i>WDR67</i>        | 0.681  | 0.262 | 0.706 |
| <i>SLC45A4</i>      | 0.487  | 0.400 | 0.681 |
| <i>LRRC14</i>       | 0.517  | 0.299 | 0.680 |
| <i>POPI</i>         | 0.522  | 0.248 | 0.679 |
| <i>SLURP1</i>       | 0.425  | 0.378 | 0.676 |
| <i>HSF1</i>         | 0.236  | 0.226 | 0.668 |
| <i>BOP1</i>         | 0.945  | 0.312 | 0.660 |
| <i>ZFP41</i>        | 0.579  | 0.329 | 0.656 |
| <i>TSPYL5</i>       | 1.076  | 0.309 | 0.647 |
| <i>LY6E</i>         | 1.450  | 0.308 | 0.634 |
| <i>NDRG1</i>        | 0.659  | 0.285 | 0.630 |
| <i>GLI4</i>         | 0.162  | 0.329 | 0.627 |
| <i>TRIB1</i>        | -0.462 | 0.285 | 0.625 |
| <i>LOC100131726</i> | 0.506  | 0.262 | 0.619 |

|                     |        |        |       |
|---------------------|--------|--------|-------|
| <i>LYNX1</i>        | -0.056 | 0.378  | 0.613 |
| <i>TIGD5</i>        | 0.495  | 0.257  | 0.607 |
| <i>FLJ42969</i>     | 0.146  | 0.231  | 0.606 |
| <i>LRRC6</i>        | 1.057  | 0.308  | 0.596 |
| <i>SNX31</i>        | 0.183  | 0.258  | 0.595 |
| <i>LY6K</i>         | 1.126  | 0.378  | 0.594 |
| <i>LRRC24</i>       | -0.222 | 0.299  | 0.593 |
| <i>LOC100133669</i> | 0.666  | 0.308  | 0.591 |
| <i>SPAG1</i>        | 1.227  | 0.257  | 0.587 |
| <i>NAPRT1</i>       | 0.586  | 0.257  | 0.575 |
| <i>ZFAT</i>         | 0.361  | 0.297  | 0.553 |
| <i>PGCP</i>         | 0.158  | 0.248  | 0.552 |
| <i>MTSSI</i>        | -0.009 | 0.321  | 0.532 |
| <i>GPT</i>          | 0.235  | 0.299  | 0.532 |
| <i>LOC157381</i>    | 0.367  | 0.296  | 0.531 |
| <i>NCRNA00051</i>   | 0.000  | 0.367  | 0.517 |
| <i>LOC728724</i>    | 0.128  | 0.331  | 0.509 |
| <i>PSCA</i>         | 1.191  | 0.378  | 0.509 |
| <i>EEF1D</i>        | 0.400  | 0.257  | 0.506 |
| <i>LY6H</i>         | 0.058  | 0.308  | 0.502 |
| <i>FBXO32</i>       | 2.201  | 0.273  | 0.497 |
| <i>MFSD3</i>        | 0.964  | 0.299  | 0.489 |
| <i>UQCRB</i>        | 0.310  | 0.254  | 0.488 |
| <i>LYPD2</i>        | -0.798 | 0.378  | 0.477 |
| <i>FBXO43</i>       | 0.339  | 0.261  | 0.455 |
| <i>PCMTD2</i>       | 0.480  | 0.318  | 0.423 |
| <i>SDC2</i>         | -0.093 | 0.254  | 0.418 |
| <i>WISP1</i>        | 1.351  | 0.290  | 0.395 |
| <i>DENND3</i>       | -1.194 | 0.358  | 0.393 |
| <i>FER1L6</i>       | 0.633  | 0.267  | 0.386 |
| <i>C8orf31</i>      | 0.708  | 0.308  | 0.357 |
| <i>MYC</i>          | -1.599 | 0.253  | 0.313 |
| <i>EIF2C2</i>       | 0.176  | 0.268  | 0.282 |
| <i>GDF6</i>         | -0.073 | 0.254  | 0.263 |
| <i>CDKN2A</i>       | 0.882  | -0.304 | 0.243 |
| <i>VPS13B</i>       | 0.961  | 0.213  | 0.215 |
| <i>MAFA</i>         | 0.019  | 0.315  | 0.177 |
| <i>KCNK9</i>        | 0.055  | 0.434  | 0.163 |
| <i>ASAP1</i>        | 0.024  | 0.229  | 0.130 |
| <i>ADCY8</i>        | -0.819 | 0.337  | 0.104 |
| <i>ZHX2</i>         | -0.125 | 0.303  | 0.096 |
| <i>OSR2</i>         | 0.439  | 0.213  | 0.095 |
| <i>RGS22</i>        | -0.111 | 0.250  | 0.081 |
| <i>KCNS2</i>        | 0.159  | 0.294  | 0.070 |

|                 |        |        |        |
|-----------------|--------|--------|--------|
| <i>MPG</i>      | 0.666  | 0.377  | 0.069  |
| <i>SYBU</i>     | 0.521  | 0.413  | 0.052  |
| <i>RHBDF1</i>   | 0.443  | 0.410  | 0.035  |
| <i>TG</i>       | 0.272  | 0.338  | -0.018 |
| <i>GPIHBP1</i>  | -2.835 | 0.308  | -0.054 |
| <i>PKHD1L1</i>  | -1.464 | 0.338  | -0.072 |
| <i>CYHR1</i>    | 0.601  | 0.299  | -0.075 |
| <i>SNRNP25</i>  | 0.896  | 0.410  | -0.085 |
| <i>TMEM71</i>   | -0.022 | 0.321  | -0.106 |
| <i>POLR3K</i>   | 1.060  | 0.410  | -0.143 |
| <i>C8ORFK29</i> | 0.028  | 0.272  | -0.152 |
| <i>AKR7A2P1</i> | -0.061 | -0.282 | -0.243 |
| <i>SLA</i>      | -0.751 | 0.374  | -0.251 |
| <i>FLJ43860</i> | -0.010 | 0.409  | -0.396 |
| <i>TRHR</i>     | -0.026 | 0.344  | -0.398 |
| <i>C9orf53</i>  | 0.029  | -0.304 | -0.451 |
| <i>GML</i>      | 0.050  | 0.370  | -0.511 |
| <i>KLHL38</i>   | 0.109  | 0.288  | -0.523 |
| <i>KCNV1</i>    | 0.027  | 0.325  | -0.523 |
| <i>HPYRI</i>    | 0.033  | 0.279  | -0.546 |
| <i>GPR20</i>    | -0.640 | 0.409  | -0.613 |
| <i>ARC</i>      | -2.163 | 0.378  | -0.717 |
| <i>NKX6-2</i>   | -0.010 | -0.077 | -0.737 |
| <i>ST3GALI</i>  | -0.034 | 0.285  | -0.894 |

---

\* FC = fold change in tumor vs. normal

**Table S13. Correlations between DNA methylation and RNA expression**

| Gene ID          | RNA exp.<br>Mean of log2(FC) | Methylation change<br>Mean of log2(T-N) | Pearson<br>corr. Coefficient |
|------------------|------------------------------|-----------------------------------------|------------------------------|
| <i>BNIP1</i>     | 0.218                        | -1.528                                  | -0.971                       |
| <i>MTIX</i>      | -1.440                       | 1.195                                   | -0.899                       |
| <i>DHRS13</i>    | 0.950                        | -1.413                                  | -0.833                       |
| <i>ADAMTS20</i>  | 0.046                        | 2.025                                   | -0.764                       |
| <i>LOC389333</i> | 0.257                        | 1.849                                   | -0.759                       |
| <i>FABP5</i>     | -0.792                       | 2.038                                   | -0.740                       |
| <i>GLRB</i>      | 0.524                        | 2.598                                   | -0.729                       |
| <i>ACBD5</i>     | 0.266                        | -1.547                                  | -0.674                       |
| <i>FOXC2</i>     | -0.260                       | 2.073                                   | -0.662                       |
| <i>KLHL35</i>    | 0.344                        | 1.686                                   | -0.657                       |
| <i>KIAA1467</i>  | -0.167                       | -1.163                                  | -0.623                       |
| <i>TBX20</i>     | 0.027                        | 1.997                                   | -0.592                       |
| <i>MRPL28</i>    | 0.403                        | 1.545                                   | -0.579                       |
| <i>ATRNL1</i>    | 0.033                        | 1.814                                   | -0.547                       |
| <i>NBPF10</i>    | 0.195                        | 1.651                                   | -0.539                       |
| <i>IL20</i>      | -0.248                       | 1.415                                   | -0.531                       |
| <i>ITGA6</i>     | -0.769                       | 2.286                                   | -0.525                       |
| <i>CCL8</i>      | -0.520                       | 1.452                                   | -0.521                       |
| <i>NEDD8</i>     | 0.303                        | 1.626                                   | -0.511                       |
| <i>PCDHB3</i>    | -0.041                       | 1.768                                   | -0.502                       |
| <i>HERC5</i>     | 0.422                        | -2.029                                  | -0.469                       |
| <i>RGS4</i>      | -0.663                       | 1.957                                   | -0.454                       |
| <i>ZBED2</i>     | -2.141                       | -2.117                                  | -0.441                       |
| <i>PERP</i>      | 1.028                        | -1.119                                  | -0.439                       |
| <i>RBP4</i>      | -1.544                       | 1.513                                   | -0.435                       |
| <i>POU3F3</i>    | 0.042                        | 1.768                                   | -0.407                       |
| <i>RALYL</i>     | 0.007                        | 1.575                                   | -0.404                       |
| <i>TMEM71</i>    | -0.022                       | 1.610                                   | -0.399                       |
| <i>NPY2R</i>     | 0.008                        | 1.862                                   | -0.395                       |
| <i>MNT</i>       | -0.280                       | 1.887                                   | -0.389                       |
| <i>PLEKHM1</i>   | -0.256                       | 1.444                                   | -0.387                       |
| <i>SYN1</i>      | 0.334                        | 1.315                                   | -0.375                       |
| <i>CLCN2</i>     | 0.159                        | -2.061                                  | -0.366                       |
| <i>GDNF</i>      | 0.259                        | 1.306                                   | -0.363                       |
| <i>ATM</i>       | 0.591                        | 1.318                                   | -0.351                       |
| <i>ABCB4</i>     | 0.577                        | 1.523                                   | -0.319                       |
| <i>MEP1A</i>     | 0.193                        | 1.292                                   | -0.304                       |
| <i>TMEM109</i>   | -0.425                       | 1.582                                   | -0.299                       |
| <i>RIPPLY2</i>   | -0.020                       | 1.647                                   | -0.281                       |
| <i>SLC35A3</i>   | 0.290                        | -2.083                                  | -0.279                       |
| <i>DUXA</i>      | -0.028                       | 1.415                                   | -0.237                       |
| <i>FAT1</i>      | 1.051                        | 1.533                                   | -0.228                       |
| <i>GBX2</i>      | 0.066                        | 2.145                                   | -0.219                       |

|                   |        |        |        |
|-------------------|--------|--------|--------|
| <i>FLRT2</i>      | -0.418 | 2.302  | -0.185 |
| <i>PCNX</i>       | -0.050 | 1.951  | -0.116 |
| <i>DHRS7</i>      | 0.513  | 1.771  | -0.103 |
| <i>HAND2</i>      | 0.058  | 1.601  | -0.085 |
| <i>CYB5R1</i>     | 0.292  | 1.484  | -0.064 |
| <i>TRMT12</i>     | 0.557  | 1.431  | -0.061 |
| <i>CNTN5</i>      | 0.025  | 1.878  | -0.053 |
| <i>DDB1</i>       | 0.396  | 1.704  | -0.051 |
| <i>MEOX2</i>      | -0.426 | 1.796  | -0.021 |
| <i>INSM1</i>      | -0.014 | 2.245  | -0.005 |
| <i>C5orf38</i>    | -0.500 | 1.885  | 0.014  |
| <i>OLIG1</i>      | -0.053 | 1.544  | 0.014  |
| <i>MAML1</i>      | 0.274  | -1.411 | 0.020  |
| <i>ZNF195</i>     | 0.681  | 2.184  | 0.075  |
| <i>KLHL26</i>     | -0.091 | -1.425 | 0.079  |
| <i>LHFPL1</i>     | 0.091  | 1.674  | 0.080  |
| <i>EYA1</i>       | 0.440  | 1.528  | 0.083  |
| <i>CDH9</i>       | -0.005 | 1.195  | 0.090  |
| <i>ALX1</i>       | 0.139  | 1.701  | 0.092  |
| <i>ZIC3</i>       | 0.000  | 1.342  | 0.108  |
| <i>FAM196B</i>    | -0.008 | 1.920  | 0.112  |
| <i>HMX1</i>       | 0.014  | 2.570  | 0.121  |
| <i>GRIK2</i>      | 0.535  | 1.550  | 0.131  |
| <i>WWC2</i>       | -1.402 | 1.896  | 0.141  |
| <i>EPC2</i>       | 0.064  | -1.444 | 0.145  |
| <i>ETV3</i>       | -0.626 | 1.749  | 0.146  |
| <i>SLC27A3</i>    | -0.715 | 1.473  | 0.158  |
| <i>CPT2</i>       | 0.513  | 1.918  | 0.174  |
| <i>ZNF850</i>     | 0.108  | 1.710  | 0.179  |
| <i>AGT</i>        | 0.730  | 1.487  | 0.190  |
| <i>PNLIPRP1</i>   | 0.000  | 1.500  | 0.200  |
| <i>SCN7A</i>      | -1.726 | -1.814 | 0.201  |
| <i>CDO1</i>       | -2.182 | 2.050  | 0.215  |
| <i>FBXL19</i>     | 0.801  | -2.091 | 0.218  |
| <i>CDH16</i>      | 0.334  | 1.573  | 0.231  |
| <i>DLX6</i>       | 0.468  | 1.821  | 0.233  |
| <i>NKX2-4</i>     | 0.027  | 2.196  | 0.245  |
| <i>SIM1</i>       | 0.044  | 2.093  | 0.247  |
| <i>EFNA4</i>      | 1.604  | 1.594  | 0.268  |
| <i>TAL1</i>       | -1.979 | 1.045  | 0.274  |
| <i>TTC30A</i>     | 0.464  | 1.636  | 0.280  |
| <i>NEDD8-MDP1</i> | -0.029 | 1.626  | 0.287  |
| <i>NDUFS6</i>     | 0.846  | 1.846  | 0.297  |
| <i>LPPR5</i>      | -0.260 | 1.557  | 0.316  |
| <i>FBXL7</i>      | -0.971 | -1.224 | 0.342  |
| <i>ITPR3</i>      | 0.382  | 1.751  | 0.348  |
| <i>HOXB4</i>      | -0.108 | 2.084  | 0.349  |



|                 |        |        |       |
|-----------------|--------|--------|-------|
| <i>WT1</i>      | -0.852 | 1.824  | 0.355 |
| <i>TOX3</i>     | 2.338  | 1.629  | 0.362 |
| <i>ZBTB25</i>   | 0.606  | -1.260 | 0.367 |
| <i>METTL14</i>  | 0.099  | 1.749  | 0.388 |
| <i>FCAMR</i>    | 0.372  | 1.415  | 0.419 |
| <i>FOXB1</i>    | 0.173  | 1.852  | 0.423 |
| <i>HOXB6</i>    | 0.401  | 1.516  | 0.435 |
| <i>DMRTA2</i>   | 0.612  | 2.305  | 0.447 |
| <i>DENND1B</i>  | 0.692  | -1.302 | 0.454 |
| <i>HMX3</i>     | -0.023 | 1.837  | 0.459 |
| <i>BTBD7</i>    | 0.162  | 2.145  | 0.485 |
| <i>SPIC</i>     | 0.037  | 1.610  | 0.495 |
| <i>HOXD8</i>    | 0.644  | 1.626  | 0.497 |
| <i>ROCK2</i>    | 0.014  | 2.277  | 0.517 |
| <i>C1orf50</i>  | 0.505  | 1.890  | 0.543 |
| <i>ZNF167</i>   | 0.279  | 1.846  | 0.547 |
| <i>PIK3R2</i>   | 0.469  | -1.814 | 0.580 |
| <i>SLC10A5</i>  | 0.418  | 1.415  | 0.591 |
| <i>ZNF673</i>   | -0.299 | 1.981  | 0.606 |
| <i>ATP5J</i>    | 0.446  | 1.346  | 0.617 |
| <i>C8orf82</i>  | 0.616  | 1.273  | 0.638 |
| <i>GPR27</i>    | -0.149 | 1.950  | 0.643 |
| <i>XCL1</i>     | 0.252  | 1.082  | 0.649 |
| <i>SCAF11</i>   | 0.344  | 1.912  | 0.666 |
| <i>KIAA1409</i> | -0.024 | 1.751  | 0.689 |
| <i>ATP6V1A</i>  | 0.215  | -1.452 | 0.703 |
| <i>YPEL3</i>    | -0.146 | 1.680  | 0.710 |
| <i>ZNF445</i>   | 0.066  | 1.654  | 0.731 |
| <i>BRIX1</i>    | 0.543  | 2.173  | 0.736 |
| <i>ST3GAL1</i>  | -0.034 | 1.864  | 0.769 |
| <i>PNMA2</i>    | 0.865  | 1.459  | 0.775 |
| <i>PMM2</i>     | 0.971  | 1.890  | 0.799 |
| <i>DPM1</i>     | 0.097  | 1.328  | 0.814 |
| <i>AJAPI</i>    | -0.402 | 1.723  | 0.842 |

---

\* FC = fold change in tumor vs. normal

**Table S14. Mapping Summary for MeDIP-Seq data**

| Sample | Read Length (bp) | # Total Reads | # Mapped Reads      | # Unique Reads      |
|--------|------------------|---------------|---------------------|---------------------|
| P1N    | 101              | 41,779,688    | 39,548,851 (94.66%) | 15,793,858 (39.94%) |
| P1T    | 101              | 38,417,109    | 36,503,317 (95.02%) | 15,625,835 (42.81%) |
| P3N    | 101              | 37,574,772    | 35,756,820 (95.16%) | 14,031,413 (39.24%) |
| P3T    | 50               | 50,891,334    | 42,044,848 (82.62%) | 18,107,822 (43.07%) |
| P4N    | 50               | 59,214,920    | 46,856,827 (79.13%) | 15,087,562 (32.20%) |
| P4T    | 50               | 56,687,621    | 46,337,339 (81.74%) | 17,790,651 (38.39%) |
| P5N    | 50               | 58,092,682    | 46,192,828 (79.52%) | 14,840,240 (32.13%) |
| P5T    | 50               | 53,599,728    | 44,132,418 (82.34%) | 16,596,380 (37.61%) |
| P6N    | 75               | 41,654,421    | 38,132,616 (91.55%) | 14,516,599 (38.07%) |
| P6T    | 101              | 39,105,545    | 36,468,222 (93.26%) | 14,089,757 (38.64%) |
| P8N    | 50               | 52,503,587    | 38,309,352 (72.97%) | 12,765,207 (33.32%) |
| P8T    | 50               | 58,414,225    | 45,588,245 (78.04%) | 16,060,922 (35.23%) |

\*N, normal; T, tumor.

**Table S15. Top scoring gene functions from Ingenuity Pathway Analysis (IPA)**

| ID | Top Functions                                                                                       | Score | Focus Molecules |
|----|-----------------------------------------------------------------------------------------------------|-------|-----------------|
| 1  | Tissue Morphology, Hematological System Development and Function, Cellular Growth and Proliferation | 30    | 32              |
| 2  | Cell Cycle, Cancer, Cellular Assembly and Organization                                              | 28    | 31              |
| 3  | Cell Death, Cancer, Cellular Movement                                                               | 24    | 29              |
| 4  | Cellular Growth and Proliferation, Cell Death, Hematological System Development and Function        | 23    | 28              |
| 5  | Skeletal and Muscular System Development and Function, Tissue Morphology, Cardiovascular Disease    | 20    | 26              |
| 6  | Cancer, Dermatological Diseases and Conditions, Cell Death                                          | 15    | 18              |
| 7  | Cell-To-Cell Signaling and Interaction, Cellular Movement, Immune Cell Trafficking                  | 13    | 21              |
| 8  | Cellular Growth and Proliferation, Cancer, Genetic Disorder                                         | 12    | 20              |
| 9  | Embryonic Development, Organ Development, Organismal Development                                    | 11    | 19              |
| 10 | Cancer, Cellular Development, Gene Expression                                                       | 11    | 19              |

\* Focus molecules: the number of Network Eligible Molecules per network.

## Supplemental References

1. Li H, Durbin R (2009) Fast and accurate short read alignment with Burrows-Wheeler transform. *Bioinformatics* 25: 1754-1760.
2. McKenna A, Hanna M, Banks E, Sivachenko A, Cibulskis K, et al. (2010) The Genome Analysis Toolkit: a MapReduce framework for analyzing next-generation DNA sequencing data. *Genome research* 20: 1297-1303.
3. Koboldt DC, Chen K, Wylie T, Larson DE, McLellan MD, et al. (2009) VarScan: variant detection in massively parallel sequencing of individual and pooled samples. *Bioinformatics* 25: 2283-2285.
4. Ng PC, Henikoff S (2003) SIFT: Predicting amino acid changes that affect protein function. *Nucleic acids research* 31: 3812-3814.
5. Robinson MD, McCarthy DJ, Smyth GK (2010) edgeR: a Bioconductor package for differential expression analysis of digital gene expression data. *Bioinformatics* 26: 139-140.
6. Ning Z, Cox AJ, Mullikin JC (2001) SSAHA: a fast search method for large DNA databases. *Genome research* 11: 1725-1729.
7. Robinson MD, Oshlack A (2010) A scaling normalization method for differential expression analysis of RNA-seq data. *Genome biology* 11: R25.
8. Xiao F, Zuo Z, Cai G, Kang S, Gao X, et al. (2009) miRecords: an integrated resource for microRNA-target interactions. *Nucleic acids research* 37: D105-110.
9. Hsu SD, Lin FM, Wu WY, Liang C, Huang WC, et al. (2011) miRTarBase: a database curates experimentally validated microRNA-target interactions. *Nucleic acids research* 39: D163-169.
10. Papadopoulos GL, Reczko M, Simossis VA, Sethupathy P, Hatzigeorgiou AG (2009) The database of experimentally supported targets: a functional update of TarBase. *Nucleic acids research* 37: D155-158.
11. Dweep H, Sticht C, Pandey P, Gretz N (2011) miRWalk--database: prediction of possible miRNA binding sites by "walking" the genes of three genomes. *Journal of biomedical informatics* 44: 839-847.
12. Garcia DM, Baek D, Shin C, Bell GW, Grimson A, et al. (2011) Weak seed-pairing stability and high target-site abundance decrease the proficiency of lsy-6 and other microRNAs. *Nature structural & molecular biology* 18: 1139-1146.
